# Supplementary material for: Construction and analysis of a lncRNA (PWRN2)-mediated ceRNA network reveal its potential roles in oocyte nuclear maturation of patients with PCOS
Source: Reprod Biol Endocrinol. 2018 Aug 3;16:73. doi: 10.1186/s12958-018-0392-4 (PMC6091030; doi:10.1186/s12958-018-0392-4)
Supplement: Supplementary file 2 — GO annotation of the target genes regulated by PWRN2. (XLSX 283 kb) [file 12958_2018_392_MOESM2_ESM.xlsx]

## Sheet: Cellular Component
Term	Database	ID	Input number	Background number	All input number	All background number	Input frequency	Background frequency	P-Value	Corrected P-Value	Input	Hyperlink
occluding junction	Cellular Component	GO:0070160	5	110	103	17517	0.0485436893203883	0.00627961408917052	0.0004785676	0.3616955	hsa:79983,POF1B,79983:down|hsa:154810,AMOTL1,154810:up|hsa:153562,MARVELD2,153562:down|hsa:56288,PARD3,56288:up|hsa:4810,NHS,4810:down	http://amigo.geneontology.org/cgi-bin/amigo/term_details?term=GO:0070160
bicellular tight junction	Cellular Component	GO:0005923	5	110	103	17517	0.0485436893203883	0.00627961408917052	0.0004785676	0.3616955	hsa:79983,POF1B,79983:down|hsa:154810,AMOTL1,154810:up|hsa:153562,MARVELD2,153562:down|hsa:56288,PARD3,56288:up|hsa:4810,NHS,4810:down	http://amigo.geneontology.org/cgi-bin/amigo/term_details?term=GO:0005923
apical junction complex	Cellular Component	GO:0043296	5	126	103	17517	0.0485436893203883	0.00719301250214078	0.0008868316	0.3616955	hsa:79983,POF1B,79983:down|hsa:154810,AMOTL1,154810:up|hsa:153562,MARVELD2,153562:down|hsa:56288,PARD3,56288:up|hsa:4810,NHS,4810:down	http://amigo.geneontology.org/cgi-bin/amigo/term_details?term=GO:0043296
cell-cell junction	Cellular Component	GO:0005911	8	364	103	17517	0.0776699029126214	0.0207798138950734	0.0013775364	0.3616955	hsa:154810,AMOTL1,154810:up|hsa:153562,MARVELD2,153562:down|hsa:10397,NDRG1,10397:up|hsa:4810,NHS,4810:down|hsa:79983,POF1B,79983:down|hsa:2709,GJB5,2709:down|hsa:56288,PARD3,56288:up|hsa:30011,SH3KBP1,30011:down	http://amigo.geneontology.org/cgi-bin/amigo/term_details?term=GO:0005911
cytosolic ribosome	Cellular Component	GO:0022626	4	96	103	17517	0.0388349514563107	0.00548039047782154	0.0024750832	0.3616955	hsa:6202,RPS8,6202:down|hsa:6143,RPL19,6143:down|hsa:6187,RPS2,6187:down|hsa:6161,RPL32,6161:down	http://amigo.geneontology.org/cgi-bin/amigo/term_details?term=GO:0022626
axonal growth cone	Cellular Component	GO:0044295	2	13	103	17517	0.0194174757281553	0.000742136210538334	0.0025602203	0.3616955	hsa:56288,PARD3,56288:up|hsa:2043,EPHA4,2043:up	http://amigo.geneontology.org/cgi-bin/amigo/term_details?term=GO:0044295
adherens junction	Cellular Component	GO:0005912	8	447	103	17517	0.0776699029126214	0.0255180681623566	0.0048567350	0.3616955	hsa:6202,RPS8,6202:down|hsa:6187,RPS2,6187:down|hsa:10397,NDRG1,10397:up|hsa:4810,NHS,4810:down|hsa:2274,FHL2,2274:up|hsa:6143,RPL19,6143:down|hsa:56288,PARD3,56288:up|hsa:30011,SH3KBP1,30011:down	http://amigo.geneontology.org/cgi-bin/amigo/term_details?term=GO:0005912
L-type voltage-gated calcium channel complex	Cellular Component	GO:1990454	1	1	103	17517	0.00970873786407767	5.70874008106411e-05	0.0058800023	0.3616955	hsa:9722,NOS1AP,9722:up	http://amigo.geneontology.org/cgi-bin/amigo/term_details?term=GO:1990454
inward rectifier potassium channel complex	Cellular Component	GO:1902937	1	1	103	17517	0.00970873786407767	5.70874008106411e-05	0.0058800023	0.3616955	hsa:9722,NOS1AP,9722:up	http://amigo.geneontology.org/cgi-bin/amigo/term_details?term=GO:1902937
anchoring junction	Cellular Component	GO:0070161	8	465	103	17517	0.0776699029126214	0.0265456413769481	0.0061263094	0.3674254	hsa:6202,RPS8,6202:down|hsa:6187,RPS2,6187:down|hsa:10397,NDRG1,10397:up|hsa:4810,NHS,4810:down|hsa:2274,FHL2,2274:up|hsa:6143,RPL19,6143:down|hsa:56288,PARD3,56288:up|hsa:30011,SH3KBP1,30011:down	http://amigo.geneontology.org/cgi-bin/amigo/term_details?term=GO:0070161
ribosome	Cellular Component	GO:0005840	5	205	103	17517	0.0485436893203883	0.0117029171661814	0.0072519388	0.3994086	hsa:6202,RPS8,6202:down|hsa:6143,RPL19,6143:down|hsa:140032,RPS4Y2,140032:down|hsa:6187,RPS2,6187:down|hsa:6161,RPL32,6161:down	http://amigo.geneontology.org/cgi-bin/amigo/term_details?term=GO:0005840
ribosomal subunit	Cellular Component	GO:0044391	4	138	103	17517	0.0388349514563107	0.00787806131186847	0.0089376609	0.4005098	hsa:6202,RPS8,6202:down|hsa:6143,RPL19,6143:down|hsa:6187,RPS2,6187:down|hsa:6161,RPL32,6161:down	http://amigo.geneontology.org/cgi-bin/amigo/term_details?term=GO:0044391
ferritin complex	Cellular Component	GO:0070288	1	2	103	17517	0.00970873786407767	0.000114174801621282	0.0117257639	0.4005098	hsa:2495,FTH1,2495:down	http://amigo.geneontology.org/cgi-bin/amigo/term_details?term=GO:0070288
intracellular ferritin complex	Cellular Component	GO:0008043	1	2	103	17517	0.00970873786407767	0.000114174801621282	0.0117257639	0.4005098	hsa:2495,FTH1,2495:down	http://amigo.geneontology.org/cgi-bin/amigo/term_details?term=GO:0008043
cell junction	Cellular Component	GO:0030054	13	1107	103	17517	0.12621359223301	0.0631957526973797	0.0128822517	0.4005098	hsa:6202,RPS8,6202:down|hsa:6187,RPS2,6187:down|hsa:154810,AMOTL1,154810:up|hsa:153562,MARVELD2,153562:down|hsa:10397,NDRG1,10397:up|hsa:2043,EPHA4,2043:up|hsa:4810,NHS,4810:down|hsa:2274,FHL2,2274:up|hsa:79983,POF1B,79983:down|hsa:6143,RPL19,6143:down|hsa:2709,GJB5,2709:down|hsa:30011,SH3KBP1,30011:down|hsa:56288,PARD3,56288:up	http://amigo.geneontology.org/cgi-bin/amigo/term_details?term=GO:0030054
apical part of cell	Cellular Component	GO:0045177	6	334	103	17517	0.058252427184466	0.0190671918707541	0.0140199178	0.4005098	hsa:257177,CFAP126,257177:down|hsa:154810,AMOTL1,154810:up|hsa:90,ACVR1,90:up|hsa:153562,MARVELD2,153562:down|hsa:56288,PARD3,56288:up|hsa:4810,NHS,4810:down	http://amigo.geneontology.org/cgi-bin/amigo/term_details?term=GO:0045177
tRNA-intron endonuclease complex	Cellular Component	GO:0000214	1	3	103	17517	0.00970873786407767	0.000171262202431923	0.0175374822	0.4005098	hsa:10978,CLP1,10978:up	http://amigo.geneontology.org/cgi-bin/amigo/term_details?term=GO:0000214
activin receptor complex	Cellular Component	GO:0048179	1	3	103	17517	0.00970873786407767	0.000171262202431923	0.0175374822	0.4005098	hsa:90,ACVR1,90:up	http://amigo.geneontology.org/cgi-bin/amigo/term_details?term=GO:0048179
clathrin-sculpted acetylcholine transport vesicle membrane	Cellular Component	GO:0060201	1	3	103	17517	0.00970873786407767	0.000171262202431923	0.0175374822	0.4005098	hsa:5864,RAB3A,5864:down	http://amigo.geneontology.org/cgi-bin/amigo/term_details?term=GO:0060201
clathrin-sculpted acetylcholine transport vesicle	Cellular Component	GO:0060200	1	3	103	17517	0.00970873786407767	0.000171262202431923	0.0175374822	0.4005098	hsa:5864,RAB3A,5864:down	http://amigo.geneontology.org/cgi-bin/amigo/term_details?term=GO:0060200
TAP complex	Cellular Component	GO:0042825	1	3	103	17517	0.00970873786407767	0.000171262202431923	0.0175374822	0.4005098	hsa:6892,TAPBP,6892:up	http://amigo.geneontology.org/cgi-bin/amigo/term_details?term=GO:0042825
cytosolic small ribosomal subunit	Cellular Component	GO:0022627	2	37	103	17517	0.0194174757281553	0.00211223382999372	0.0199486240	0.4005098	hsa:6202,RPS8,6202:down|hsa:6187,RPS2,6187:down	http://amigo.geneontology.org/cgi-bin/amigo/term_details?term=GO:0022627
sarcoplasmic reticulum membrane	Cellular Component	GO:0033017	2	37	103	17517	0.0194174757281553	0.00211223382999372	0.0199486240	0.4005098	hsa:9722,NOS1AP,9722:up|hsa:79073,TMEM109,79073:down	http://amigo.geneontology.org/cgi-bin/amigo/term_details?term=GO:0033017
clathrin-sculpted glutamate transport vesicle membrane	Cellular Component	GO:0060203	1	4	103	17517	0.00970873786407767	0.000228349603242564	0.0233153536	0.4005098	hsa:5864,RAB3A,5864:down	http://amigo.geneontology.org/cgi-bin/amigo/term_details?term=GO:0060203
MHC class I peptide loading complex	Cellular Component	GO:0042824	1	4	103	17517	0.00970873786407767	0.000228349603242564	0.0233153536	0.4005098	hsa:6892,TAPBP,6892:up	http://amigo.geneontology.org/cgi-bin/amigo/term_details?term=GO:0042824
clathrin-sculpted glutamate transport vesicle	Cellular Component	GO:0060199	1	4	103	17517	0.00970873786407767	0.000228349603242564	0.0233153536	0.4005098	hsa:5864,RAB3A,5864:down	http://amigo.geneontology.org/cgi-bin/amigo/term_details?term=GO:0060199
paranodal junction	Cellular Component	GO:0033010	1	4	103	17517	0.00970873786407767	0.000228349603242564	0.0233153536	0.4005098	hsa:153562,MARVELD2,153562:down	http://amigo.geneontology.org/cgi-bin/amigo/term_details?term=GO:0033010
internode region of axon	Cellular Component	GO:0033269	1	4	103	17517	0.00970873786407767	0.000228349603242564	0.0233153536	0.4005098	hsa:56288,PARD3,56288:up	http://amigo.geneontology.org/cgi-bin/amigo/term_details?term=GO:0033269
focal adhesion	Cellular Component	GO:0005925	6	377	103	17517	0.058252427184466	0.0215219501056117	0.0238722921	0.4061676	hsa:6202,RPS8,6202:down|hsa:6143,RPL19,6143:down|hsa:6187,RPS2,6187:down|hsa:30011,SH3KBP1,30011:down|hsa:4810,NHS,4810:down|hsa:2274,FHL2,2274:up	http://amigo.geneontology.org/cgi-bin/amigo/term_details?term=GO:0005925
cell-substrate adherens junction	Cellular Component	GO:0005924	6	382	103	17517	0.058252427184466	0.0218073871096649	0.0252581133	0.4207932	hsa:6202,RPS8,6202:down|hsa:6143,RPL19,6143:down|hsa:6187,RPS2,6187:down|hsa:30011,SH3KBP1,30011:down|hsa:4810,NHS,4810:down|hsa:2274,FHL2,2274:up	http://amigo.geneontology.org/cgi-bin/amigo/term_details?term=GO:0005924
cell-substrate junction	Cellular Component	GO:0030055	6	386	103	17517	0.058252427184466	0.0220357367129075	0.0264048532	0.4232478	hsa:6202,RPS8,6202:down|hsa:6143,RPL19,6143:down|hsa:6187,RPS2,6187:down|hsa:30011,SH3KBP1,30011:down|hsa:4810,NHS,4810:down|hsa:2274,FHL2,2274:up	http://amigo.geneontology.org/cgi-bin/amigo/term_details?term=GO:0030055
clathrin-sculpted monoamine transport vesicle membrane	Cellular Component	GO:0070083	1	5	103	17517	0.00970873786407767	0.000285437004053205	0.0290595732	0.4232478	hsa:5864,RAB3A,5864:down	http://amigo.geneontology.org/cgi-bin/amigo/term_details?term=GO:0070083
clathrin-sculpted monoamine transport vesicle	Cellular Component	GO:0070081	1	5	103	17517	0.00970873786407767	0.000285437004053205	0.0290595732	0.4232478	hsa:5864,RAB3A,5864:down	http://amigo.geneontology.org/cgi-bin/amigo/term_details?term=GO:0070081
cell-cell adherens junction	Cellular Component	GO:0005913	2	46	103	17517	0.0194174757281553	0.00262602043728949	0.0299631720	0.4232478	hsa:10397,NDRG1,10397:up|hsa:56288,PARD3,56288:up	http://amigo.geneontology.org/cgi-bin/amigo/term_details?term=GO:0005913
mitochondrial respiratory chain complex I	Cellular Component	GO:0005747	2	47	103	17517	0.0194174757281553	0.00268310783810013	0.0311769406	0.4232478	hsa:4538,ND4,4538:down|hsa:4537,ND3,4537:up	http://amigo.geneontology.org/cgi-bin/amigo/term_details?term=GO:0005747
NADH dehydrogenase complex	Cellular Component	GO:0030964	2	47	103	17517	0.0194174757281553	0.00268310783810013	0.0311769406	0.4232478	hsa:4538,ND4,4538:down|hsa:4537,ND3,4537:up	http://amigo.geneontology.org/cgi-bin/amigo/term_details?term=GO:0030964
respiratory chain complex I	Cellular Component	GO:0045271	2	47	103	17517	0.0194174757281553	0.00268310783810013	0.0311769406	0.4232478	hsa:4538,ND4,4538:down|hsa:4537,ND3,4537:up	http://amigo.geneontology.org/cgi-bin/amigo/term_details?term=GO:0045271
cytosolic part	Cellular Component	GO:0044445	4	203	103	17517	0.0388349514563107	0.0115887423645601	0.0318647810	0.4232478	hsa:6202,RPS8,6202:down|hsa:6143,RPL19,6143:down|hsa:6187,RPS2,6187:down|hsa:6161,RPL32,6161:down	http://amigo.geneontology.org/cgi-bin/amigo/term_details?term=GO:0044445
endoribonuclease complex	Cellular Component	GO:1902555	1	6	103	17517	0.00970873786407767	0.000342524404863847	0.0347703352	0.4232478	hsa:10978,CLP1,10978:up	http://amigo.geneontology.org/cgi-bin/amigo/term_details?term=GO:1902555
neuromuscular junction	Cellular Component	GO:0031594	2	50	103	17517	0.0194174757281553	0.00285437004053205	0.0349324950	0.4232478	hsa:23546,SYNGR4,23546:up|hsa:2043,EPHA4,2043:up	http://amigo.geneontology.org/cgi-bin/amigo/term_details?term=GO:0031594
cytosolic large ribosomal subunit	Cellular Component	GO:0022625	2	51	103	17517	0.0194174757281553	0.0029114574413427	0.0362215600	0.4293555	hsa:6143,RPL19,6143:down|hsa:6161,RPL32,6161:down	http://amigo.geneontology.org/cgi-bin/amigo/term_details?term=GO:0022625
cytosol	Cellular Component	GO:0005829	24	2823	103	17517	0.233009708737864	0.16115773248844	0.0363282013	0.4293555	hsa:5999,RGS4,5999:down|hsa:6202,RPS8,6202:down|hsa:55841,WWC3,55841:up|hsa:6187,RPS2,6187:down|hsa:154810,AMOTL1,154810:up|hsa:80321,CEP70,80321:up|hsa:115004,MB21D1,115004:down|hsa:10397,NDRG1,10397:up|hsa:2495,FTH1,2495:down|hsa:30011,SH3KBP1,30011:down|hsa:9722,NOS1AP,9722:up|hsa:149428,BNIPL,149428:up|hsa:6161,RPL32,6161:down|hsa:3091,HIF1A,3091:up|hsa:23263,MCF2L,23263:down|hsa:752,FMNL1,75…	http://amigo.geneontology.org/cgi-bin/amigo/term_details?term=GO:0005829
Smc5-Smc6 complex	Cellular Component	GO:0030915	1	7	103	17517	0.00970873786407767	0.000399611805674488	0.0404478325	0.4293555	hsa:56160,NDNL2,56160:up	http://amigo.geneontology.org/cgi-bin/amigo/term_details?term=GO:0030915
bleb	Cellular Component	GO:0032059	1	7	103	17517	0.00970873786407767	0.000399611805674488	0.0404478325	0.4293555	hsa:752,FMNL1,752:down	http://amigo.geneontology.org/cgi-bin/amigo/term_details?term=GO:0032059
sarcoplasmic reticulum	Cellular Component	GO:0016529	2	58	103	17517	0.0194174757281553	0.00331106924701718	0.0457399473	0.4405391	hsa:9722,NOS1AP,9722:up|hsa:79073,TMEM109,79073:down	http://amigo.geneontology.org/cgi-bin/amigo/term_details?term=GO:0016529
clathrin-sculpted gamma-aminobutyric acid transport vesicle membrane	Cellular Component	GO:0061202	1	8	103	17517	0.00970873786407767	0.000456699206485129	0.0460922570	0.4405391	hsa:5864,RAB3A,5864:down	http://amigo.geneontology.org/cgi-bin/amigo/term_details?term=GO:0061202
clathrin-sculpted gamma-aminobutyric acid transport vesicle	Cellular Component	GO:0061200	1	8	103	17517	0.00970873786407767	0.000456699206485129	0.0460922570	0.4405391	hsa:5864,RAB3A,5864:down	http://amigo.geneontology.org/cgi-bin/amigo/term_details?term=GO:0061200
small ribosomal subunit	Cellular Component	GO:0015935	2	61	103	17517	0.0194174757281553	0.00348233144944911	0.0500708778	0.4510451	hsa:6202,RPS8,6202:down|hsa:6187,RPS2,6187:down	http://amigo.geneontology.org/cgi-bin/amigo/term_details?term=GO:0015935
axon part	Cellular Component	GO:0033267	3	141	103	17517	0.029126213592233	0.00804932351430039	0.0504652222	0.4510451	hsa:56288,PARD3,56288:up|hsa:2043,EPHA4,2043:up|hsa:5864,RAB3A,5864:down	http://amigo.geneontology.org/cgi-bin/amigo/term_details?term=GO:0033267
respiratory chain complex	Cellular Component	GO:0098803	2	63	103	17517	0.0194174757281553	0.00359650625107039	0.0530372666	0.4593372	hsa:4538,ND4,4538:down|hsa:4537,ND3,4537:up	http://amigo.geneontology.org/cgi-bin/amigo/term_details?term=GO:0098803
sarcoplasm	Cellular Component	GO:0016528	2	64	103	17517	0.0194174757281553	0.00365359365188103	0.0545434969	0.4689959	hsa:9722,NOS1AP,9722:up|hsa:79073,TMEM109,79073:down	http://amigo.geneontology.org/cgi-bin/amigo/term_details?term=GO:0016528
lamellipodium	Cellular Component	GO:0030027	3	153	103	17517	0.029126213592233	0.00873437232402809	0.0614653277	0.4925711	hsa:154810,AMOTL1,154810:up|hsa:23263,MCF2L,23263:down|hsa:4810,NHS,4810:down	http://amigo.geneontology.org/cgi-bin/amigo/term_details?term=GO:0030027
apical plasma membrane	Cellular Component	GO:0016324	4	257	103	17517	0.0388349514563107	0.0146714620083348	0.0650938736	0.4983432	hsa:257177,CFAP126,257177:down|hsa:154810,AMOTL1,154810:up|hsa:153562,MARVELD2,153562:down|hsa:4810,NHS,4810:down	http://amigo.geneontology.org/cgi-bin/amigo/term_details?term=GO:0016324
nuclear membrane	Cellular Component	GO:0031965	4	259	103	17517	0.0388349514563107	0.014785636809956	0.0665764908	0.4983432	hsa:80321,CEP70,80321:up|hsa:199953,TMEM201,199953:down|hsa:9722,NOS1AP,9722:up|hsa:79073,TMEM109,79073:down	http://amigo.geneontology.org/cgi-bin/amigo/term_details?term=GO:0031965
mitochondrial respiratory chain	Cellular Component	GO:0005746	2	72	103	17517	0.0194174757281553	0.00411029285836616	0.0671166124	0.4983432	hsa:4538,ND4,4538:down|hsa:4537,ND3,4537:up	http://amigo.geneontology.org/cgi-bin/amigo/term_details?term=GO:0005746
Schmidt-Lanterman incisure	Cellular Component	GO:0043220	1	12	103	17517	0.00970873786407767	0.000685048809727693	0.0683430264	0.4983432	hsa:153562,MARVELD2,153562:down	http://amigo.geneontology.org/cgi-bin/amigo/term_details?term=GO:0043220
clathrin-sculpted vesicle	Cellular Component	GO:0060198	1	12	103	17517	0.00970873786407767	0.000685048809727693	0.0683430264	0.4983432	hsa:5864,RAB3A,5864:down	http://amigo.geneontology.org/cgi-bin/amigo/term_details?term=GO:0060198
nuclear envelope	Cellular Component	GO:0005635	5	377	103	17517	0.0485436893203883	0.0215219501056117	0.0716133191	0.5031420	hsa:10553,HTATIP2,10553:down|hsa:80321,CEP70,80321:up|hsa:199953,TMEM201,199953:down|hsa:9722,NOS1AP,9722:up|hsa:79073,TMEM109,79073:down	http://amigo.geneontology.org/cgi-bin/amigo/term_details?term=GO:0005635
cell projection	Cellular Component	GO:0042995	14	1569	103	17517	0.135922330097087	0.0895701318718959	0.0754233370	0.5068364	hsa:154810,AMOTL1,154810:up|hsa:3091,HIF1A,3091:up|hsa:23263,MCF2L,23263:down|hsa:752,FMNL1,752:down|hsa:54084,TSPEAR,54084:up|hsa:2043,EPHA4,2043:up|hsa:5864,RAB3A,5864:down|hsa:4810,NHS,4810:down|hsa:66004,LYNX1,66004:up|hsa:257177,CFAP126,257177:down|hsa:2821,GPI,2821:up|hsa:30011,SH3KBP1,30011:down|hsa:56288,PARD3,56288:up|hsa:199221,DZIP1L,199221:up	http://amigo.geneontology.org/cgi-bin/amigo/term_details?term=GO:0042995
large ribosomal subunit	Cellular Component	GO:0015934	2	78	103	17517	0.0194174757281553	0.00445281726323001	0.0771116791	0.5112378	hsa:6143,RPL19,6143:down|hsa:6161,RPL32,6161:down	http://amigo.geneontology.org/cgi-bin/amigo/term_details?term=GO:0015934
axon terminus	Cellular Component	GO:0043679	2	80	103	17517	0.0194174757281553	0.00456699206485129	0.0805421952	0.5117851	hsa:2043,EPHA4,2043:up|hsa:5864,RAB3A,5864:down	http://amigo.geneontology.org/cgi-bin/amigo/term_details?term=GO:0043679
respiratory chain	Cellular Component	GO:0070469	2	80	103	17517	0.0194174757281553	0.00456699206485129	0.0805421952	0.5117851	hsa:4538,ND4,4538:down|hsa:4537,ND3,4537:up	http://amigo.geneontology.org/cgi-bin/amigo/term_details?term=GO:0070469
voltage-gated potassium channel complex	Cellular Component	GO:0008076	2	81	103	17517	0.0194174757281553	0.00462407946566193	0.0822750884	0.5117851	hsa:389816,LRRC26,389816:up|hsa:9722,NOS1AP,9722:up	http://amigo.geneontology.org/cgi-bin/amigo/term_details?term=GO:0008076
ciliary basal body	Cellular Component	GO:0036064	2	82	103	17517	0.0194174757281553	0.00468116686647257	0.0840194792	0.5117851	hsa:257177,CFAP126,257177:down|hsa:199221,DZIP1L,199221:up	http://amigo.geneontology.org/cgi-bin/amigo/term_details?term=GO:0036064
potassium channel complex	Cellular Component	GO:0034705	2	82	103	17517	0.0194174757281553	0.00468116686647257	0.0840194792	0.5117851	hsa:389816,LRRC26,389816:up|hsa:9722,NOS1AP,9722:up	http://amigo.geneontology.org/cgi-bin/amigo/term_details?term=GO:0034705
interstitial matrix	Cellular Component	GO:0005614	1	15	103	17517	0.00970873786407767	0.000856311012159616	0.0846930791	0.5117851	hsa:64856,VWA1,64856:up	http://amigo.geneontology.org/cgi-bin/amigo/term_details?term=GO:0005614
mRNA cleavage factor complex	Cellular Component	GO:0005849	1	15	103	17517	0.00970873786407767	0.000856311012159616	0.0846930791	0.5117851	hsa:10978,CLP1,10978:up	http://amigo.geneontology.org/cgi-bin/amigo/term_details?term=GO:0005849
ribonucleoprotein complex	Cellular Component	GO:0030529	7	648	103	17517	0.0679611650485437	0.0369926357252954	0.0873473575	0.5219836	hsa:6202,RPS8,6202:down|hsa:6143,RPL19,6143:down|hsa:140032,RPS4Y2,140032:down|hsa:6187,RPS2,6187:down|hsa:339345,NANOS2,339345:up|hsa:6161,RPL32,6161:down|hsa:58509,CACTIN,58509:up	http://amigo.geneontology.org/cgi-bin/amigo/term_details?term=GO:0030529
compact myelin	Cellular Component	GO:0043218	1	16	103	17517	0.00970873786407767	0.000913398412970257	0.0900796986	0.5219836	hsa:153562,MARVELD2,153562:down	http://amigo.geneontology.org/cgi-bin/amigo/term_details?term=GO:0043218
neuron projection terminus	Cellular Component	GO:0044306	2	90	103	17517	0.0194174757281553	0.0051378660729577	0.0983658696	0.5314859	hsa:2043,EPHA4,2043:up|hsa:5864,RAB3A,5864:down	http://amigo.geneontology.org/cgi-bin/amigo/term_details?term=GO:0044306
oxidoreductase complex	Cellular Component	GO:1990204	2	90	103	17517	0.0194174757281553	0.0051378660729577	0.0983658696	0.5314859	hsa:4538,ND4,4538:down|hsa:4537,ND3,4537:up	http://amigo.geneontology.org/cgi-bin/amigo/term_details?term=GO:1990204
connexon complex	Cellular Component	GO:0005922	1	20	103	17517	0.00970873786407767	0.00114174801621282	0.1113140379	0.5368307	hsa:2709,GJB5,2709:down	http://amigo.geneontology.org/cgi-bin/amigo/term_details?term=GO:0005922
M band	Cellular Component	GO:0031430	1	20	103	17517	0.00970873786407767	0.00114174801621282	0.1113140379	0.5368307	hsa:2274,FHL2,2274:up	http://amigo.geneontology.org/cgi-bin/amigo/term_details?term=GO:0031430
inner mitochondrial membrane protein complex	Cellular Component	GO:0098800	2	98	103	17517	0.0194174757281553	0.00559456527944283	0.1133422479	0.5384318	hsa:4538,ND4,4538:down|hsa:4537,ND3,4537:up	http://amigo.geneontology.org/cgi-bin/amigo/term_details?term=GO:0098800
exon-exon junction complex	Cellular Component	GO:0035145	1	21	103	17517	0.00970873786407767	0.00119883541702346	0.1165454864	0.5418462	hsa:26019,UPF2,26019:up	http://amigo.geneontology.org/cgi-bin/amigo/term_details?term=GO:0035145
cell cortex	Cellular Component	GO:0005938	3	211	103	17517	0.029126213592233	0.0120454415710453	0.1279139566	0.5569248	hsa:752,FMNL1,752:down|hsa:56288,PARD3,56288:up|hsa:79816,TLE6,79816:down	http://amigo.geneontology.org/cgi-bin/amigo/term_details?term=GO:0005938
nuclear outer membrane	Cellular Component	GO:0005640	1	24	103	17517	0.00970873786407767	0.00137009761945539	0.1320575421	0.5617128	hsa:79073,TMEM109,79073:down	http://amigo.geneontology.org/cgi-bin/amigo/term_details?term=GO:0005640
Z disc	Cellular Component	GO:0030018	2	109	103	17517	0.0194174757281553	0.00622252668835988	0.1348043891	0.5663789	hsa:9722,NOS1AP,9722:up|hsa:2274,FHL2,2274:up	http://amigo.geneontology.org/cgi-bin/amigo/term_details?term=GO:0030018
organelle envelope	Cellular Component	GO:0031967	9	1017	103	17517	0.087378640776699	0.058057886624422	0.1437969089	0.5690375	hsa:1373,CPS1,1373:up|hsa:80321,CEP70,80321:up|hsa:2043,EPHA4,2043:up|hsa:79073,TMEM109,79073:down|hsa:10553,HTATIP2,10553:down|hsa:4538,ND4,4538:down|hsa:199953,TMEM201,199953:down|hsa:9722,NOS1AP,9722:up|hsa:4537,ND3,4537:up	http://amigo.geneontology.org/cgi-bin/amigo/term_details?term=GO:0031967
envelope	Cellular Component	GO:0031975	9	1022	103	17517	0.087378640776699	0.0583433236284752	0.1468251061	0.5690375	hsa:1373,CPS1,1373:up|hsa:80321,CEP70,80321:up|hsa:2043,EPHA4,2043:up|hsa:79073,TMEM109,79073:down|hsa:10553,HTATIP2,10553:down|hsa:4538,ND4,4538:down|hsa:199953,TMEM201,199953:down|hsa:9722,NOS1AP,9722:up|hsa:4537,ND3,4537:up	http://amigo.geneontology.org/cgi-bin/amigo/term_details?term=GO:0031975
stereocilium	Cellular Component	GO:0032420	1	28	103	17517	0.00970873786407767	0.00159844722269795	0.1523214481	0.5707725	hsa:54084,TSPEAR,54084:up	http://amigo.geneontology.org/cgi-bin/amigo/term_details?term=GO:0032420
lumenal side of endoplasmic reticulum membrane	Cellular Component	GO:0098553	1	28	103	17517	0.00970873786407767	0.00159844722269795	0.1523214481	0.5707725	hsa:6892,TAPBP,6892:up	http://amigo.geneontology.org/cgi-bin/amigo/term_details?term=GO:0098553
integral component of lumenal side of endoplasmic reticulum membrane	Cellular Component	GO:0071556	1	28	103	17517	0.00970873786407767	0.00159844722269795	0.1523214481	0.5707725	hsa:6892,TAPBP,6892:up	http://amigo.geneontology.org/cgi-bin/amigo/term_details?term=GO:0071556
lumenal side of membrane	Cellular Component	GO:0098576	1	28	103	17517	0.00970873786407767	0.00159844722269795	0.1523214481	0.5707725	hsa:6892,TAPBP,6892:up	http://amigo.geneontology.org/cgi-bin/amigo/term_details?term=GO:0098576
gap junction	Cellular Component	GO:0005921	1	29	103	17517	0.00970873786407767	0.00165553462350859	0.1573137799	0.5761767	hsa:2709,GJB5,2709:down	http://amigo.geneontology.org/cgi-bin/amigo/term_details?term=GO:0005921
I band	Cellular Component	GO:0031674	2	123	103	17517	0.0194174757281553	0.00702175029970885	0.1632816623	0.5786008	hsa:9722,NOS1AP,9722:up|hsa:2274,FHL2,2274:up	http://amigo.geneontology.org/cgi-bin/amigo/term_details?term=GO:0031674
growth cone	Cellular Component	GO:0030426	2	127	103	17517	0.0194174757281553	0.00725009990295142	0.1716084984	0.5932587	hsa:56288,PARD3,56288:up|hsa:2043,EPHA4,2043:up	http://amigo.geneontology.org/cgi-bin/amigo/term_details?term=GO:0030426
A band	Cellular Component	GO:0031672	1	32	103	17517	0.00970873786407767	0.00182679682594051	0.1721167383	0.5932587	hsa:2274,FHL2,2274:up	http://amigo.geneontology.org/cgi-bin/amigo/term_details?term=GO:0031672
mitochondrial protein complex	Cellular Component	GO:0098798	2	128	103	17517	0.0194174757281553	0.00730718730376206	0.1737013897	0.5952995	hsa:4538,ND4,4538:down|hsa:4537,ND3,4537:up	http://amigo.geneontology.org/cgi-bin/amigo/term_details?term=GO:0098798
synaptic vesicle	Cellular Component	GO:0008021	2	128	103	17517	0.0194174757281553	0.00730718730376206	0.1737013897	0.5952995	hsa:23546,SYNGR4,23546:up|hsa:5864,RAB3A,5864:down	http://amigo.geneontology.org/cgi-bin/amigo/term_details?term=GO:0008021
plasma membrane region	Cellular Component	GO:0098590	6	640	103	17517	0.058252427184466	0.0365359365188103	0.1750842394	0.5967755	hsa:257177,CFAP126,257177:down|hsa:154810,AMOTL1,154810:up|hsa:153562,MARVELD2,153562:down|hsa:9722,NOS1AP,9722:up|hsa:54084,TSPEAR,54084:up|hsa:4810,NHS,4810:down	http://amigo.geneontology.org/cgi-bin/amigo/term_details?term=GO:0098590
site of polarized growth	Cellular Component	GO:0030427	2	130	103	17517	0.0194174757281553	0.00742136210538334	0.1778997349	0.5968972	hsa:56288,PARD3,56288:up|hsa:2043,EPHA4,2043:up	http://amigo.geneontology.org/cgi-bin/amigo/term_details?term=GO:0030427
COP9 signalosome	Cellular Component	GO:0008180	1	35	103	17517	0.00970873786407767	0.00199805902837244	0.1866621427	0.6076017	hsa:154810,AMOTL1,154810:up	http://amigo.geneontology.org/cgi-bin/amigo/term_details?term=GO:0008180
endoplasmic reticulum-Golgi intermediate compartment membrane	Cellular Component	GO:0033116	1	35	103	17517	0.00970873786407767	0.00199805902837244	0.1866621427	0.6076017	hsa:57222,ERGIC1,57222:down	http://amigo.geneontology.org/cgi-bin/amigo/term_details?term=GO:0033116
stereocilium bundle	Cellular Component	GO:0032421	1	38	103	17517	0.00970873786407767	0.00216932123080436	0.2009544310	0.6221893	hsa:54084,TSPEAR,54084:up	http://amigo.geneontology.org/cgi-bin/amigo/term_details?term=GO:0032421
T-tubule	Cellular Component	GO:0030315	1	39	103	17517	0.00970873786407767	0.002226408631615	0.2056630353	0.6221893	hsa:9722,NOS1AP,9722:up	http://amigo.geneontology.org/cgi-bin/amigo/term_details?term=GO:0030315
recycling endosome membrane	Cellular Component	GO:0055038	1	39	103	17517	0.00970873786407767	0.002226408631615	0.2056630353	0.6221893	hsa:10397,NDRG1,10397:up	http://amigo.geneontology.org/cgi-bin/amigo/term_details?term=GO:0055038
nucleoid	Cellular Component	GO:0009295	1	40	103	17517	0.00970873786407767	0.00228349603242564	0.2103441605	0.6252982	hsa:1373,CPS1,1373:up	http://amigo.geneontology.org/cgi-bin/amigo/term_details?term=GO:0009295
mitochondrial nucleoid	Cellular Component	GO:0042645	1	40	103	17517	0.00970873786407767	0.00228349603242564	0.2103441605	0.6252982	hsa:1373,CPS1,1373:up	http://amigo.geneontology.org/cgi-bin/amigo/term_details?term=GO:0042645
voltage-gated calcium channel complex	Cellular Component	GO:0005891	1	40	103	17517	0.00970873786407767	0.00228349603242564	0.2103441605	0.6252982	hsa:9722,NOS1AP,9722:up	http://amigo.geneontology.org/cgi-bin/amigo/term_details?term=GO:0005891
presynapse	Cellular Component	GO:0098793	2	148	103	17517	0.0194174757281553	0.00844893531997488	0.2162941050	0.6332686	hsa:23546,SYNGR4,23546:up|hsa:5864,RAB3A,5864:down	http://amigo.geneontology.org/cgi-bin/amigo/term_details?term=GO:0098793
myelin sheath	Cellular Component	GO:0043209	1	42	103	17517	0.00970873786407767	0.00239767083404693	0.2196246084	0.6332686	hsa:153562,MARVELD2,153562:down	http://amigo.geneontology.org/cgi-bin/amigo/term_details?term=GO:0043209
terminal bouton	Cellular Component	GO:0043195	1	43	103	17517	0.00970873786407767	0.00245475823485757	0.2242242459	0.6365846	hsa:5864,RAB3A,5864:down	http://amigo.geneontology.org/cgi-bin/amigo/term_details?term=GO:0043195
ciliary part	Cellular Component	GO:0044441	3	280	103	17517	0.029126213592233	0.0159844722269795	0.2276575099	0.6410454	hsa:257177,CFAP126,257177:down|hsa:54084,TSPEAR,54084:up|hsa:199221,DZIP1L,199221:up	http://amigo.geneontology.org/cgi-bin/amigo/term_details?term=GO:0044441
cytoplasm	Cellular Component	GO:0005737	62	9824	103	17517	0.601941747572815	0.560826625563738	0.2291529559	0.6410454	hsa:5999,RGS4,5999:down|hsa:6202,RPS8,6202:down|hsa:6187,RPS2,6187:down|hsa:154810,AMOTL1,154810:up|hsa:1850,DUSP8,1850:up|hsa:80321,CEP70,80321:up|hsa:9473,THEMIS2,9473:up|hsa:10397,NDRG1,10397:up|hsa:4291,MLF1,4291:up|hsa:389816,LRRC26,389816:up|hsa:2043,EPHA4,2043:up|hsa:10978,CLP1,10978:up|hsa:4810,NHS,4810:down|hsa:79073,TMEM109,79073:down|hsa:79856,SNX22,79856:down|hsa:9666,DZIP3,9666:up|hs…	http://amigo.geneontology.org/cgi-bin/amigo/term_details?term=GO:0005737
nuclear inner membrane	Cellular Component	GO:0005637	1	45	103	17517	0.00970873786407767	0.00256893303647885	0.2333431285	0.6448324	hsa:199953,TMEM201,199953:down	http://amigo.geneontology.org/cgi-bin/amigo/term_details?term=GO:0005637
cilium	Cellular Component	GO:0005929	4	420	103	17517	0.0388349514563107	0.0239767083404693	0.2342068153	0.6450771	hsa:257177,CFAP126,257177:down|hsa:3091,HIF1A,3091:up|hsa:54084,TSPEAR,54084:up|hsa:199221,DZIP1L,199221:up	http://amigo.geneontology.org/cgi-bin/amigo/term_details?term=GO:0005929
non-membrane-bounded organelle	Cellular Component	GO:0043228	24	3526	103	17517	0.233009708737864	0.20129017525832	0.2435675695	0.6580164	hsa:6202,RPS8,6202:down|hsa:6187,RPS2,6187:down|hsa:1373,CPS1,1373:up|hsa:80321,CEP70,80321:up|hsa:10397,NDRG1,10397:up|hsa:389816,LRRC26,389816:up|hsa:54084,TSPEAR,54084:up|hsa:51667,NUB1,51667:up|hsa:2274,FHL2,2274:up|hsa:257177,CFAP126,257177:down|hsa:23567,ZNF346,23567:up|hsa:56160,NDNL2,56160:up|hsa:30011,SH3KBP1,30011:down|hsa:9722,NOS1AP,9722:up|hsa:199221,DZIP1L,199221:up|hsa:55930,MYO5C,…	http://amigo.geneontology.org/cgi-bin/amigo/term_details?term=GO:0043228
intracellular non-membrane-bounded organelle	Cellular Component	GO:0043232	24	3526	103	17517	0.233009708737864	0.20129017525832	0.2435675695	0.6580164	hsa:6202,RPS8,6202:down|hsa:6187,RPS2,6187:down|hsa:1373,CPS1,1373:up|hsa:80321,CEP70,80321:up|hsa:10397,NDRG1,10397:up|hsa:389816,LRRC26,389816:up|hsa:54084,TSPEAR,54084:up|hsa:51667,NUB1,51667:up|hsa:2274,FHL2,2274:up|hsa:257177,CFAP126,257177:down|hsa:23567,ZNF346,23567:up|hsa:56160,NDNL2,56160:up|hsa:30011,SH3KBP1,30011:down|hsa:9722,NOS1AP,9722:up|hsa:199221,DZIP1L,199221:up|hsa:55930,MYO5C,…	http://amigo.geneontology.org/cgi-bin/amigo/term_details?term=GO:0043232
cation channel complex	Cellular Component	GO:0034703	2	162	103	17517	0.0194174757281553	0.00924815893132386	0.2466489239	0.6586517	hsa:389816,LRRC26,389816:up|hsa:9722,NOS1AP,9722:up	http://amigo.geneontology.org/cgi-bin/amigo/term_details?term=GO:0034703
microtubule organizing center	Cellular Component	GO:0005815	5	573	103	17517	0.0485436893203883	0.0327110806644973	0.2477778996	0.6604658	hsa:257177,CFAP126,257177:down|hsa:6161,RPL32,6161:down|hsa:80321,CEP70,80321:up|hsa:10397,NDRG1,10397:up|hsa:199221,DZIP1L,199221:up	http://amigo.geneontology.org/cgi-bin/amigo/term_details?term=GO:0005815
organelle outer membrane	Cellular Component	GO:0031968	2	163	103	17517	0.0194174757281553	0.0093052463321345	0.2488257621	0.6617883	hsa:2043,EPHA4,2043:up|hsa:79073,TMEM109,79073:down	http://amigo.geneontology.org/cgi-bin/amigo/term_details?term=GO:0031968
mitochondrial membrane part	Cellular Component	GO:0044455	2	167	103	17517	0.0194174757281553	0.00953359593537706	0.2575391939	0.6737585	hsa:4538,ND4,4538:down|hsa:4537,ND3,4537:up	http://amigo.geneontology.org/cgi-bin/amigo/term_details?term=GO:0044455
centrosome	Cellular Component	GO:0005813	4	442	103	17517	0.0388349514563107	0.0252326311583034	0.2623595141	0.6770229	hsa:6161,RPL32,6161:down|hsa:80321,CEP70,80321:up|hsa:10397,NDRG1,10397:up|hsa:199221,DZIP1L,199221:up	http://amigo.geneontology.org/cgi-bin/amigo/term_details?term=GO:0005813
outer membrane	Cellular Component	GO:0019867	2	170	103	17517	0.0194174757281553	0.00970485813780898	0.2640783919	0.6770229	hsa:2043,EPHA4,2043:up|hsa:79073,TMEM109,79073:down	http://amigo.geneontology.org/cgi-bin/amigo/term_details?term=GO:0019867
main axon	Cellular Component	GO:0044304	1	52	103	17517	0.00970873786407767	0.00296854484215334	0.2644312076	0.6770229	hsa:56288,PARD3,56288:up	http://amigo.geneontology.org/cgi-bin/amigo/term_details?term=GO:0044304
synaptic vesicle membrane	Cellular Component	GO:0030672	1	54	103	17517	0.00970873786407767	0.00308271964377462	0.2730819186	0.6852757	hsa:23546,SYNGR4,23546:up	http://amigo.geneontology.org/cgi-bin/amigo/term_details?term=GO:0030672
axon	Cellular Component	GO:0030424	3	318	103	17517	0.029126213592233	0.0181537934577839	0.2876939642	0.7025780	hsa:56288,PARD3,56288:up|hsa:2043,EPHA4,2043:up|hsa:5864,RAB3A,5864:down	http://amigo.geneontology.org/cgi-bin/amigo/term_details?term=GO:0030424
sarcomere	Cellular Component	GO:0030017	2	181	103	17517	0.0194174757281553	0.010332819546726	0.2880503886	0.7025780	hsa:9722,NOS1AP,9722:up|hsa:2274,FHL2,2274:up	http://amigo.geneontology.org/cgi-bin/amigo/term_details?term=GO:0030017
chromosome, telomeric region	Cellular Component	GO:0000781	1	58	103	17517	0.00970873786407767	0.00331106924701718	0.2900822196	0.7025780	hsa:56160,NDNL2,56160:up	http://amigo.geneontology.org/cgi-bin/amigo/term_details?term=GO:0000781
cell leading edge	Cellular Component	GO:0031252	3	322	103	17517	0.029126213592233	0.0183821430610264	0.2941098378	0.7038432	hsa:154810,AMOTL1,154810:up|hsa:23263,MCF2L,23263:down|hsa:4810,NHS,4810:down	http://amigo.geneontology.org/cgi-bin/amigo/term_details?term=GO:0031252
myosin complex	Cellular Component	GO:0016459	1	62	103	17517	0.00970873786407767	0.00353941885025975	0.3066887080	0.7220277	hsa:55930,MYO5C,55930:up	http://amigo.geneontology.org/cgi-bin/amigo/term_details?term=GO:0016459
calcium channel complex	Cellular Component	GO:0034704	1	62	103	17517	0.00970873786407767	0.00353941885025975	0.3066887080	0.7220277	hsa:9722,NOS1AP,9722:up	http://amigo.geneontology.org/cgi-bin/amigo/term_details?term=GO:0034704
serine/threonine protein kinase complex	Cellular Component	GO:1902554	1	63	103	17517	0.00970873786407767	0.00359650625107039	0.3107798603	0.7237023	hsa:90,ACVR1,90:up	http://amigo.geneontology.org/cgi-bin/amigo/term_details?term=GO:1902554
cytoplasmic mRNA processing body	Cellular Component	GO:0000932	1	63	103	17517	0.00970873786407767	0.00359650625107039	0.3107798603	0.7237023	hsa:339345,NANOS2,339345:up	http://amigo.geneontology.org/cgi-bin/amigo/term_details?term=GO:0000932
plasma membrane protein complex	Cellular Component	GO:0098797	4	479	103	17517	0.0388349514563107	0.0273448649882971	0.3110135143	0.7237023	hsa:90,ACVR1,90:up|hsa:2709,GJB5,2709:down|hsa:389816,LRRC26,389816:up|hsa:9722,NOS1AP,9722:up	http://amigo.geneontology.org/cgi-bin/amigo/term_details?term=GO:0098797
vesicle	Cellular Component	GO:0031982	23	3504	103	17517	0.223300970873786	0.200034252440486	0.3130228188	0.7245803	hsa:6202,RPS8,6202:down|hsa:6187,RPS2,6187:down|hsa:154810,AMOTL1,154810:up|hsa:55023,PHIP,55023:up|hsa:10397,NDRG1,10397:up|hsa:84957,RELT,84957:up|hsa:54622,ARL15,54622:up|hsa:389816,LRRC26,389816:up|hsa:79073,TMEM109,79073:down|hsa:79856,SNX22,79856:down|hsa:64856,VWA1,64856:up|hsa:66004,LYNX1,66004:up|hsa:2495,FTH1,2495:down|hsa:3029,HAGH,3029:down|hsa:58509,CACTIN,58509:up|hsa:30011,SH3KBP1,…	http://amigo.geneontology.org/cgi-bin/amigo/term_details?term=GO:0031982
cell projection part	Cellular Component	GO:0044463	6	784	103	17517	0.058252427184466	0.0447565222355426	0.3141337244	0.7245803	hsa:257177,CFAP126,257177:down|hsa:56288,PARD3,56288:up|hsa:54084,TSPEAR,54084:up|hsa:2043,EPHA4,2043:up|hsa:199221,DZIP1L,199221:up|hsa:5864,RAB3A,5864:down	http://amigo.geneontology.org/cgi-bin/amigo/term_details?term=GO:0044463
perikaryon	Cellular Component	GO:0043204	1	65	103	17517	0.00970873786407767	0.00371068105269167	0.3188905780	0.7263987	hsa:2043,EPHA4,2043:up	http://amigo.geneontology.org/cgi-bin/amigo/term_details?term=GO:0043204
proteasome complex	Cellular Component	GO:0000502	1	65	103	17517	0.00970873786407767	0.00371068105269167	0.3188905780	0.7263987	hsa:5886,RAD23A,5886:down	http://amigo.geneontology.org/cgi-bin/amigo/term_details?term=GO:0000502
neuron projection	Cellular Component	GO:0043005	6	791	103	17517	0.058252427184466	0.0451561340412171	0.3214198393	0.7263987	hsa:66004,LYNX1,66004:up|hsa:2821,GPI,2821:up|hsa:30011,SH3KBP1,30011:down|hsa:56288,PARD3,56288:up|hsa:2043,EPHA4,2043:up|hsa:5864,RAB3A,5864:down	http://amigo.geneontology.org/cgi-bin/amigo/term_details?term=GO:0043005
contractile fiber part	Cellular Component	GO:0044449	2	198	103	17517	0.0194174757281553	0.0113033053605069	0.3249124871	0.7290993	hsa:9722,NOS1AP,9722:up|hsa:2274,FHL2,2274:up	http://amigo.geneontology.org/cgi-bin/amigo/term_details?term=GO:0044449
caveola	Cellular Component	GO:0005901	1	68	103	17517	0.00970873786407767	0.00388194325512359	0.3308797507	0.7340427	hsa:9722,NOS1AP,9722:up	http://amigo.geneontology.org/cgi-bin/amigo/term_details?term=GO:0005901
plasma membrane raft	Cellular Component	GO:0044853	1	69	103	17517	0.00970873786407767	0.00393903065593424	0.3348295121	0.7369321	hsa:9722,NOS1AP,9722:up	http://amigo.geneontology.org/cgi-bin/amigo/term_details?term=GO:0044853
organelle inner membrane	Cellular Component	GO:0019866	4	499	103	17517	0.0388349514563107	0.0284866130045099	0.3377175695	0.7394687	hsa:1373,CPS1,1373:up|hsa:4538,ND4,4538:down|hsa:199953,TMEM201,199953:down|hsa:4537,ND3,4537:up	http://amigo.geneontology.org/cgi-bin/amigo/term_details?term=GO:0019866
myofibril	Cellular Component	GO:0030016	2	204	103	17517	0.0194174757281553	0.0116458297653708	0.3378204881	0.7394687	hsa:9722,NOS1AP,9722:up|hsa:2274,FHL2,2274:up	http://amigo.geneontology.org/cgi-bin/amigo/term_details?term=GO:0030016
ciliary membrane	Cellular Component	GO:0060170	1	70	103	17517	0.00970873786407767	0.00399611805674488	0.3387561833	0.7394687	hsa:54084,TSPEAR,54084:up	http://amigo.geneontology.org/cgi-bin/amigo/term_details?term=GO:0060170
nucleolus	Cellular Component	GO:0005730	6	814	103	17517	0.058252427184466	0.0464691442598619	0.3455333244	0.7461156	hsa:6143,RPL19,6143:down|hsa:1373,CPS1,1373:up|hsa:23567,ZNF346,23567:up|hsa:3091,HIF1A,3091:up|hsa:51388,NIP7,51388:up|hsa:51667,NUB1,51667:up	http://amigo.geneontology.org/cgi-bin/amigo/term_details?term=GO:0005730
endoplasmic reticulum-Golgi intermediate compartment	Cellular Component	GO:0005793	1	74	103	17517	0.00970873786407767	0.00422446765998744	0.3542346295	0.7500520	hsa:57222,ERGIC1,57222:down	http://amigo.geneontology.org/cgi-bin/amigo/term_details?term=GO:0005793
secretory granule membrane	Cellular Component	GO:0030667	1	74	103	17517	0.00970873786407767	0.00422446765998744	0.3542346295	0.7500520	hsa:5864,RAB3A,5864:down	http://amigo.geneontology.org/cgi-bin/amigo/term_details?term=GO:0030667
filopodium	Cellular Component	GO:0030175	1	76	103	17517	0.00970873786407767	0.00433864246160872	0.3618387513	0.7522107	hsa:2043,EPHA4,2043:up	http://amigo.geneontology.org/cgi-bin/amigo/term_details?term=GO:0030175
clathrin-coated vesicle membrane	Cellular Component	GO:0030665	1	76	103	17517	0.00970873786407767	0.00433864246160872	0.3618387513	0.7522107	hsa:5864,RAB3A,5864:down	http://amigo.geneontology.org/cgi-bin/amigo/term_details?term=GO:0030665
contractile fiber	Cellular Component	GO:0043292	2	216	103	17517	0.0194174757281553	0.0123308785750985	0.3634090800	0.7535158	hsa:9722,NOS1AP,9722:up|hsa:2274,FHL2,2274:up	http://amigo.geneontology.org/cgi-bin/amigo/term_details?term=GO:0043292
nucleus	Cellular Component	GO:0005634	40	6438	103	17517	0.388349514563107	0.367528686418907	0.3651239798	0.7535158	hsa:6202,RPS8,6202:down|hsa:6187,RPS2,6187:down|hsa:154810,AMOTL1,154810:up|hsa:1850,DUSP8,1850:up|hsa:80321,CEP70,80321:up|hsa:9473,THEMIS2,9473:up|hsa:10397,NDRG1,10397:up|hsa:4291,MLF1,4291:up|hsa:10978,CLP1,10978:up|hsa:79073,TMEM109,79073:down|hsa:2495,FTH1,2495:down|hsa:54925,ZSCAN32,54925:up|hsa:23567,ZNF346,23567:up|hsa:9722,NOS1AP,9722:up|hsa:79650,USB1,79650:up|hsa:5886,RAD23A,5886:down…	http://amigo.geneontology.org/cgi-bin/amigo/term_details?term=GO:0005634
phagocytic vesicle	Cellular Component	GO:0045335	1	79	103	17517	0.00970873786407767	0.00450990466404065	0.3730789756	0.7545075	hsa:752,FMNL1,752:down	http://amigo.geneontology.org/cgi-bin/amigo/term_details?term=GO:0045335
RNA polymerase II transcription factor complex	Cellular Component	GO:0090575	1	79	103	17517	0.00970873786407767	0.00450990466404065	0.3730789756	0.7545075	hsa:3091,HIF1A,3091:up	http://amigo.geneontology.org/cgi-bin/amigo/term_details?term=GO:0090575
cytoplasmic vesicle part	Cellular Component	GO:0044433	4	527	103	17517	0.0388349514563107	0.0300850602272079	0.3752515758	0.7545075	hsa:79856,SNX22,79856:down|hsa:23546,SYNGR4,23546:up|hsa:30011,SH3KBP1,30011:down|hsa:5864,RAB3A,5864:down	http://amigo.geneontology.org/cgi-bin/amigo/term_details?term=GO:0044433
nuclear part	Cellular Component	GO:0044428	23	3624	103	17517	0.223300970873786	0.206884740537763	0.3775543387	0.7553950	hsa:6187,RPS2,6187:down|hsa:154810,AMOTL1,154810:up|hsa:1373,CPS1,1373:up|hsa:80321,CEP70,80321:up|hsa:4291,MLF1,4291:up|hsa:51667,NUB1,51667:up|hsa:10978,CLP1,10978:up|hsa:2274,FHL2,2274:up|hsa:79073,TMEM109,79073:down|hsa:10553,HTATIP2,10553:down|hsa:23567,ZNF346,23567:up|hsa:58509,CACTIN,58509:up|hsa:199953,TMEM201,199953:down|hsa:9722,NOS1AP,9722:up|hsa:5886,RAD23A,5886:down|hsa:3091,HIF1A,30…	http://amigo.geneontology.org/cgi-bin/amigo/term_details?term=GO:0044428
catalytic step 2 spliceosome	Cellular Component	GO:0071013	1	82	103	17517	0.00970873786407767	0.00468116686647257	0.3841231092	0.7596961	hsa:58509,CACTIN,58509:up	http://amigo.geneontology.org/cgi-bin/amigo/term_details?term=GO:0071013
protein kinase complex	Cellular Component	GO:1902911	1	82	103	17517	0.00970873786407767	0.00468116686647257	0.3841231092	0.7596961	hsa:90,ACVR1,90:up	http://amigo.geneontology.org/cgi-bin/amigo/term_details?term=GO:1902911
Golgi lumen	Cellular Component	GO:0005796	1	82	103	17517	0.00970873786407767	0.00468116686647257	0.3841231092	0.7596961	hsa:8548,BLZF1,8548:up	http://amigo.geneontology.org/cgi-bin/amigo/term_details?term=GO:0005796
membrane protein complex	Cellular Component	GO:0098796	7	1020	103	17517	0.0679611650485437	0.0582291488268539	0.3932221155	0.7647651	hsa:6892,TAPBP,6892:up|hsa:90,ACVR1,90:up|hsa:4538,ND4,4538:down|hsa:2709,GJB5,2709:down|hsa:389816,LRRC26,389816:up|hsa:9722,NOS1AP,9722:up|hsa:4537,ND3,4537:up	http://amigo.geneontology.org/cgi-bin/amigo/term_details?term=GO:0098796
transport vesicle membrane	Cellular Component	GO:0030658	1	85	103	17517	0.00970873786407767	0.00485242906890449	0.3949745402	0.7647651	hsa:5864,RAB3A,5864:down	http://amigo.geneontology.org/cgi-bin/amigo/term_details?term=GO:0030658
microvillus	Cellular Component	GO:0005902	1	85	103	17517	0.00970873786407767	0.00485242906890449	0.3949745402	0.7647651	hsa:54084,TSPEAR,54084:up	http://amigo.geneontology.org/cgi-bin/amigo/term_details?term=GO:0005902
centriole	Cellular Component	GO:0005814	1	87	103	17517	0.00970873786407767	0.00496660387052577	0.4021034172	0.7748161	hsa:199221,DZIP1L,199221:up	http://amigo.geneontology.org/cgi-bin/amigo/term_details?term=GO:0005814
neuron part	Cellular Component	GO:0097458	7	1033	103	17517	0.0679611650485437	0.0589712850373922	0.4059132631	0.7750419	hsa:66004,LYNX1,66004:up|hsa:2821,GPI,2821:up|hsa:23546,SYNGR4,23546:up|hsa:30011,SH3KBP1,30011:down|hsa:56288,PARD3,56288:up|hsa:2043,EPHA4,2043:up|hsa:5864,RAB3A,5864:down	http://amigo.geneontology.org/cgi-bin/amigo/term_details?term=GO:0097458
motile cilium	Cellular Component	GO:0031514	1	89	103	17517	0.00970873786407767	0.00508077867214706	0.4091491023	0.7750419	hsa:3091,HIF1A,3091:up	http://amigo.geneontology.org/cgi-bin/amigo/term_details?term=GO:0031514
acrosomal vesicle	Cellular Component	GO:0001669	1	90	103	17517	0.00970873786407767	0.0051378660729577	0.4126410487	0.7750419	hsa:5864,RAB3A,5864:down	http://amigo.geneontology.org/cgi-bin/amigo/term_details?term=GO:0001669
extracellular exosome	Cellular Component	GO:0070062	17	2689	103	17517	0.16504854368932	0.153508020779814	0.4133584274	0.7750419	hsa:6202,RPS8,6202:down|hsa:6187,RPS2,6187:down|hsa:55023,PHIP,55023:up|hsa:10397,NDRG1,10397:up|hsa:84957,RELT,84957:up|hsa:54622,ARL15,54622:up|hsa:389816,LRRC26,389816:up|hsa:79073,TMEM109,79073:down|hsa:64856,VWA1,64856:up|hsa:66004,LYNX1,66004:up|hsa:2495,FTH1,2495:down|hsa:3029,HAGH,3029:down|hsa:58509,CACTIN,58509:up|hsa:55930,MYO5C,55930:up|hsa:752,FMNL1,752:down|hsa:23473,CAPN7,23473:up|…	http://amigo.geneontology.org/cgi-bin/amigo/term_details?term=GO:0070062
extracellular vesicle	Cellular Component	GO:1903561	17	2689	103	17517	0.16504854368932	0.153508020779814	0.4133584274	0.7750419	hsa:6202,RPS8,6202:down|hsa:6187,RPS2,6187:down|hsa:55023,PHIP,55023:up|hsa:10397,NDRG1,10397:up|hsa:84957,RELT,84957:up|hsa:54622,ARL15,54622:up|hsa:389816,LRRC26,389816:up|hsa:79073,TMEM109,79073:down|hsa:64856,VWA1,64856:up|hsa:66004,LYNX1,66004:up|hsa:2495,FTH1,2495:down|hsa:3029,HAGH,3029:down|hsa:58509,CACTIN,58509:up|hsa:55930,MYO5C,55930:up|hsa:752,FMNL1,752:down|hsa:23473,CAPN7,23473:up|…	http://amigo.geneontology.org/cgi-bin/amigo/term_details?term=GO:1903561
extracellular organelle	Cellular Component	GO:0043230	17	2690	103	17517	0.16504854368932	0.153565108180625	0.4139927839	0.7750419	hsa:6202,RPS8,6202:down|hsa:6187,RPS2,6187:down|hsa:55023,PHIP,55023:up|hsa:10397,NDRG1,10397:up|hsa:84957,RELT,84957:up|hsa:54622,ARL15,54622:up|hsa:389816,LRRC26,389816:up|hsa:79073,TMEM109,79073:down|hsa:64856,VWA1,64856:up|hsa:66004,LYNX1,66004:up|hsa:2495,FTH1,2495:down|hsa:3029,HAGH,3029:down|hsa:58509,CACTIN,58509:up|hsa:55930,MYO5C,55930:up|hsa:752,FMNL1,752:down|hsa:23473,CAPN7,23473:up|…	http://amigo.geneontology.org/cgi-bin/amigo/term_details?term=GO:0043230
extracellular membrane-bounded organelle	Cellular Component	GO:0065010	17	2690	103	17517	0.16504854368932	0.153565108180625	0.4139927839	0.7750419	hsa:6202,RPS8,6202:down|hsa:6187,RPS2,6187:down|hsa:55023,PHIP,55023:up|hsa:10397,NDRG1,10397:up|hsa:84957,RELT,84957:up|hsa:54622,ARL15,54622:up|hsa:389816,LRRC26,389816:up|hsa:79073,TMEM109,79073:down|hsa:64856,VWA1,64856:up|hsa:66004,LYNX1,66004:up|hsa:2495,FTH1,2495:down|hsa:3029,HAGH,3029:down|hsa:58509,CACTIN,58509:up|hsa:55930,MYO5C,55930:up|hsa:752,FMNL1,752:down|hsa:23473,CAPN7,23473:up|…	http://amigo.geneontology.org/cgi-bin/amigo/term_details?term=GO:0065010
basement membrane	Cellular Component	GO:0005604	1	93	103	17517	0.00970873786407767	0.00530912827538962	0.4229947313	0.7787908	hsa:64856,VWA1,64856:up	http://amigo.geneontology.org/cgi-bin/amigo/term_details?term=GO:0005604
cytoplasmic vesicle membrane	Cellular Component	GO:0030659	3	405	103	17517	0.029126213592233	0.0231203973283096	0.4268697385	0.7829209	hsa:79856,SNX22,79856:down|hsa:30011,SH3KBP1,30011:down|hsa:5864,RAB3A,5864:down	http://amigo.geneontology.org/cgi-bin/amigo/term_details?term=GO:0030659
early endosome membrane	Cellular Component	GO:0031901	1	96	103	17517	0.00970873786407767	0.00548039047782154	0.4331676450	0.7854642	hsa:2043,EPHA4,2043:up	http://amigo.geneontology.org/cgi-bin/amigo/term_details?term=GO:0031901
dendritic spine	Cellular Component	GO:0043197	1	97	103	17517	0.00970873786407767	0.00553747787863219	0.4365189872	0.7873752	hsa:2043,EPHA4,2043:up	http://amigo.geneontology.org/cgi-bin/amigo/term_details?term=GO:0043197
membrane-bounded vesicle	Cellular Component	GO:0031988	21	3403	103	17517	0.203883495145631	0.194268424958612	0.4414625447	0.7896084	hsa:6202,RPS8,6202:down|hsa:6187,RPS2,6187:down|hsa:55023,PHIP,55023:up|hsa:10397,NDRG1,10397:up|hsa:84957,RELT,84957:up|hsa:54622,ARL15,54622:up|hsa:389816,LRRC26,389816:up|hsa:79073,TMEM109,79073:down|hsa:79856,SNX22,79856:down|hsa:64856,VWA1,64856:up|hsa:66004,LYNX1,66004:up|hsa:2495,FTH1,2495:down|hsa:3029,HAGH,3029:down|hsa:58509,CACTIN,58509:up|hsa:30011,SH3KBP1,30011:down|hsa:55930,MYO5C,5…	http://amigo.geneontology.org/cgi-bin/amigo/term_details?term=GO:0031988
perinuclear region of cytoplasm	Cellular Component	GO:0048471	4	578	103	17517	0.0388349514563107	0.0329965176685506	0.4430412026	0.7896084	hsa:26019,UPF2,26019:up|hsa:339345,NANOS2,339345:up|hsa:10397,NDRG1,10397:up|hsa:9722,NOS1AP,9722:up	http://amigo.geneontology.org/cgi-bin/amigo/term_details?term=GO:0048471
neuron spine	Cellular Component	GO:0044309	1	99	103	17517	0.00970873786407767	0.00565165268025347	0.4431629157	0.7896084	hsa:2043,EPHA4,2043:up	http://amigo.geneontology.org/cgi-bin/amigo/term_details?term=GO:0044309
synapse	Cellular Component	GO:0045202	4	579	103	17517	0.0388349514563107	0.0330536050693612	0.4443534043	0.7898247	hsa:23546,SYNGR4,23546:up|hsa:30011,SH3KBP1,30011:down|hsa:2043,EPHA4,2043:up|hsa:5864,RAB3A,5864:down	http://amigo.geneontology.org/cgi-bin/amigo/term_details?term=GO:0045202
macromolecular complex	Cellular Component	GO:0032991	28	4587	103	17517	0.271844660194175	0.261859907518411	0.4458580781	0.7898247	hsa:5999,RGS4,5999:down|hsa:6202,RPS8,6202:down|hsa:6187,RPS2,6187:down|hsa:154810,AMOTL1,154810:up|hsa:1373,CPS1,1373:up|hsa:90,ACVR1,90:up|hsa:10397,NDRG1,10397:up|hsa:389816,LRRC26,389816:up|hsa:10978,CLP1,10978:up|hsa:2495,FTH1,2495:down|hsa:56160,NDNL2,56160:up|hsa:58509,CACTIN,58509:up|hsa:9722,NOS1AP,9722:up|hsa:5886,RAD23A,5886:down|hsa:55930,MYO5C,55930:up|hsa:6892,TAPBP,6892:up|hsa:3393…	http://amigo.geneontology.org/cgi-bin/amigo/term_details?term=GO:0032991
vesicle membrane	Cellular Component	GO:0012506	3	419	103	17517	0.029126213592233	0.0239196209396586	0.4486342717	0.7898247	hsa:79856,SNX22,79856:down|hsa:30011,SH3KBP1,30011:down|hsa:5864,RAB3A,5864:down	http://amigo.geneontology.org/cgi-bin/amigo/term_details?term=GO:0012506
nuclear transcription factor complex	Cellular Component	GO:0044798	1	101	103	17517	0.00970873786407767	0.00576582748187475	0.4497292582	0.7898247	hsa:3091,HIF1A,3091:up	http://amigo.geneontology.org/cgi-bin/amigo/term_details?term=GO:0044798
sarcolemma	Cellular Component	GO:0042383	1	103	103	17517	0.00970873786407767	0.00588000228349603	0.4562189119	0.7965569	hsa:9722,NOS1AP,9722:up	http://amigo.geneontology.org/cgi-bin/amigo/term_details?term=GO:0042383
synapse part	Cellular Component	GO:0044456	3	429	103	17517	0.029126213592233	0.024490494947765	0.4639829702	0.8039438	hsa:23546,SYNGR4,23546:up|hsa:2043,EPHA4,2043:up|hsa:5864,RAB3A,5864:down	http://amigo.geneontology.org/cgi-bin/amigo/term_details?term=GO:0044456
ion channel complex	Cellular Component	GO:0034702	2	273	103	17517	0.0194174757281553	0.015584860421305	0.4788581657	0.8101416	hsa:389816,LRRC26,389816:up|hsa:9722,NOS1AP,9722:up	http://amigo.geneontology.org/cgi-bin/amigo/term_details?term=GO:0034702
integral component of endoplasmic reticulum membrane	Cellular Component	GO:0030176	1	112	103	17517	0.00970873786407767	0.0063937888907918	0.4844968755	0.8150828	hsa:6892,TAPBP,6892:up	http://amigo.geneontology.org/cgi-bin/amigo/term_details?term=GO:0030176
cytoplasmic vesicle	Cellular Component	GO:0031410	7	1117	103	17517	0.0679611650485437	0.0637666267054861	0.4873148843	0.8167783	hsa:79856,SNX22,79856:down|hsa:154810,AMOTL1,154810:up|hsa:23546,SYNGR4,23546:up|hsa:153562,MARVELD2,153562:down|hsa:752,FMNL1,752:down|hsa:30011,SH3KBP1,30011:down|hsa:5864,RAB3A,5864:down	http://amigo.geneontology.org/cgi-bin/amigo/term_details?term=GO:0031410
cell periphery	Cellular Component	GO:0071944	28	4666	103	17517	0.271844660194175	0.266369812182451	0.4874077710	0.8167783	hsa:5999,RGS4,5999:down|hsa:10501,SEMA6B,10501:down|hsa:154810,AMOTL1,154810:up|hsa:29933,GPR132,29933:up|hsa:90,ACVR1,90:up|hsa:10397,NDRG1,10397:up|hsa:84957,RELT,84957:up|hsa:390036,OR52K1,390036:up|hsa:389816,LRRC26,389816:up|hsa:54084,TSPEAR,54084:up|hsa:2043,EPHA4,2043:up|hsa:4810,NHS,4810:down|hsa:66004,LYNX1,66004:up|hsa:257177,CFAP126,257177:down|hsa:971,CD72,971:down|hsa:30011,SH3KBP1,3…	http://amigo.geneontology.org/cgi-bin/amigo/term_details?term=GO:0071944
intrinsic component of endoplasmic reticulum membrane	Cellular Component	GO:0031227	1	117	103	17517	0.00970873786407767	0.00667922589484501	0.4995724434	0.8295864	hsa:6892,TAPBP,6892:up	http://amigo.geneontology.org/cgi-bin/amigo/term_details?term=GO:0031227
mitochondrial inner membrane	Cellular Component	GO:0005743	3	454	103	17517	0.029126213592233	0.0259176799680311	0.5015255179	0.8297184	hsa:1373,CPS1,1373:up|hsa:4538,ND4,4538:down|hsa:4537,ND3,4537:up	http://amigo.geneontology.org/cgi-bin/amigo/term_details?term=GO:0005743
mitochondrial membrane	Cellular Component	GO:0031966	4	624	103	17517	0.0388349514563107	0.03562253810584	0.5023305503	0.8297184	hsa:1373,CPS1,1373:up|hsa:4538,ND4,4538:down|hsa:2043,EPHA4,2043:up|hsa:4537,ND3,4537:up	http://amigo.geneontology.org/cgi-bin/amigo/term_details?term=GO:0031966
recycling endosome	Cellular Component	GO:0055037	1	119	103	17517	0.00970873786407767	0.00679340069646629	0.5054796793	0.8317186	hsa:10397,NDRG1,10397:up	http://amigo.geneontology.org/cgi-bin/amigo/term_details?term=GO:0055037
coated vesicle membrane	Cellular Component	GO:0030662	1	120	103	17517	0.00970873786407767	0.00685048809727693	0.5084073488	0.8319708	hsa:5864,RAB3A,5864:down	http://amigo.geneontology.org/cgi-bin/amigo/term_details?term=GO:0030662
microtubule organizing center part	Cellular Component	GO:0044450	1	120	103	17517	0.00970873786407767	0.00685048809727693	0.5084073488	0.8319708	hsa:199221,DZIP1L,199221:up	http://amigo.geneontology.org/cgi-bin/amigo/term_details?term=GO:0044450
organelle membrane	Cellular Component	GO:0031090	17	2841	103	17517	0.16504854368932	0.162185305703031	0.5099313495	0.8338959	hsa:57222,ERGIC1,57222:down|hsa:1373,CPS1,1373:up|hsa:80321,CEP70,80321:up|hsa:10397,NDRG1,10397:up|hsa:54084,TSPEAR,54084:up|hsa:2043,EPHA4,2043:up|hsa:79073,TMEM109,79073:down|hsa:79856,SNX22,79856:down|hsa:30011,SH3KBP1,30011:down|hsa:199953,TMEM201,199953:down|hsa:9722,NOS1AP,9722:up|hsa:6892,TAPBP,6892:up|hsa:5864,RAB3A,5864:down|hsa:23546,SYNGR4,23546:up|hsa:4538,ND4,4538:down|hsa:4537,ND3,…	http://amigo.geneontology.org/cgi-bin/amigo/term_details?term=GO:0031090
ribonucleoprotein granule	Cellular Component	GO:0035770	1	123	103	17517	0.00970873786407767	0.00702175029970885	0.5170877642	0.8381713	hsa:339345,NANOS2,339345:up	http://amigo.geneontology.org/cgi-bin/amigo/term_details?term=GO:0035770
cytoplasmic ribonucleoprotein granule	Cellular Component	GO:0036464	1	123	103	17517	0.00970873786407767	0.00702175029970885	0.5170877642	0.8381713	hsa:339345,NANOS2,339345:up	http://amigo.geneontology.org/cgi-bin/amigo/term_details?term=GO:0036464
sperm part	Cellular Component	GO:0097223	1	123	103	17517	0.00970873786407767	0.00702175029970885	0.5170877642	0.8381713	hsa:5864,RAB3A,5864:down	http://amigo.geneontology.org/cgi-bin/amigo/term_details?term=GO:0097223
microtubule cytoskeleton	Cellular Component	GO:0015630	6	982	103	17517	0.058252427184466	0.0560598275960495	0.5214788604	0.8400360	hsa:257177,CFAP126,257177:down|hsa:6161,RPL32,6161:down|hsa:80321,CEP70,80321:up|hsa:10397,NDRG1,10397:up|hsa:56288,PARD3,56288:up|hsa:199221,DZIP1L,199221:up	http://amigo.geneontology.org/cgi-bin/amigo/term_details?term=GO:0015630
extracellular matrix component	Cellular Component	GO:0044420	1	127	103	17517	0.00970873786407767	0.00725009990295142	0.5284259515	0.8440641	hsa:64856,VWA1,64856:up	http://amigo.geneontology.org/cgi-bin/amigo/term_details?term=GO:0044420
plasma membrane	Cellular Component	GO:0005886	27	4575	103	17517	0.262135922330097	0.261174858708683	0.5288808056	0.8440641	hsa:5999,RGS4,5999:down|hsa:10501,SEMA6B,10501:down|hsa:154810,AMOTL1,154810:up|hsa:29933,GPR132,29933:up|hsa:90,ACVR1,90:up|hsa:10397,NDRG1,10397:up|hsa:84957,RELT,84957:up|hsa:390036,OR52K1,390036:up|hsa:389816,LRRC26,389816:up|hsa:54084,TSPEAR,54084:up|hsa:2043,EPHA4,2043:up|hsa:4810,NHS,4810:down|hsa:66004,LYNX1,66004:up|hsa:257177,CFAP126,257177:down|hsa:971,CD72,971:down|hsa:30011,SH3KBP1,3…	http://amigo.geneontology.org/cgi-bin/amigo/term_details?term=GO:0005886
postsynaptic density	Cellular Component	GO:0014069	1	128	103	17517	0.00970873786407767	0.00730718730376206	0.5312190582	0.8450892	hsa:2043,EPHA4,2043:up	http://amigo.geneontology.org/cgi-bin/amigo/term_details?term=GO:0014069
transmembrane transporter complex	Cellular Component	GO:1902495	2	305	103	17517	0.0194174757281553	0.0174116572472455	0.5379657551	0.8485075	hsa:389816,LRRC26,389816:up|hsa:9722,NOS1AP,9722:up	http://amigo.geneontology.org/cgi-bin/amigo/term_details?term=GO:1902495
cytoskeleton	Cellular Component	GO:0005856	11	1865	103	17517	0.106796116504854	0.106468002511846	0.5429538114	0.8486958	hsa:6161,RPL32,6161:down|hsa:80321,CEP70,80321:up|hsa:8030,CCDC6,8030:up|hsa:10397,NDRG1,10397:up|hsa:389816,LRRC26,389816:up|hsa:2274,FHL2,2274:up|hsa:257177,CFAP126,257177:down|hsa:30011,SH3KBP1,30011:down|hsa:56288,PARD3,56288:up|hsa:55930,MYO5C,55930:up|hsa:199221,DZIP1L,199221:up	http://amigo.geneontology.org/cgi-bin/amigo/term_details?term=GO:0005856
clathrin-coated vesicle	Cellular Component	GO:0030136	1	133	103	17517	0.00970873786407767	0.00759262430781527	0.5449407312	0.8486958	hsa:5864,RAB3A,5864:down	http://amigo.geneontology.org/cgi-bin/amigo/term_details?term=GO:0030136
transporter complex	Cellular Component	GO:1990351	2	310	103	17517	0.0194174757281553	0.0176970942512987	0.5467825140	0.8486958	hsa:389816,LRRC26,389816:up|hsa:9722,NOS1AP,9722:up	http://amigo.geneontology.org/cgi-bin/amigo/term_details?term=GO:1990351
mitochondrial envelope	Cellular Component	GO:0005740	4	660	103	17517	0.0388349514563107	0.0376776845350231	0.5468169490	0.8486958	hsa:1373,CPS1,1373:up|hsa:4538,ND4,4538:down|hsa:2043,EPHA4,2043:up|hsa:4537,ND3,4537:up	http://amigo.geneontology.org/cgi-bin/amigo/term_details?term=GO:0005740
anchored component of membrane	Cellular Component	GO:0031225	1	140	103	17517	0.00970873786407767	0.00799223611348975	0.5634852381	0.8526750	hsa:66004,LYNX1,66004:up	http://amigo.geneontology.org/cgi-bin/amigo/term_details?term=GO:0031225
mitochondrial outer membrane	Cellular Component	GO:0005741	1	140	103	17517	0.00970873786407767	0.00799223611348975	0.5634852381	0.8526750	hsa:2043,EPHA4,2043:up	http://amigo.geneontology.org/cgi-bin/amigo/term_details?term=GO:0005741
intracellular	Cellular Component	GO:0005622	75	12799	103	17517	0.728155339805825	0.730661642975395	0.5734838084	0.8554917	hsa:5999,RGS4,5999:down|hsa:154810,AMOTL1,154810:up|hsa:1850,DUSP8,1850:up|hsa:80321,CEP70,80321:up|hsa:10397,NDRG1,10397:up|hsa:54084,TSPEAR,54084:up|hsa:2043,EPHA4,2043:up|hsa:10978,CLP1,10978:up|hsa:79073,TMEM109,79073:down|hsa:9666,DZIP3,9666:up|hsa:2495,FTH1,2495:down|hsa:54925,ZSCAN32,54925:up|hsa:30011,SH3KBP1,30011:down|hsa:9722,NOS1AP,9722:up|hsa:5886,RAD23A,5886:down|hsa:153562,MARVELD2…	http://amigo.geneontology.org/cgi-bin/amigo/term_details?term=GO:0005622
mitochondrial part	Cellular Component	GO:0044429	5	866	103	17517	0.0485436893203883	0.0494376891020152	0.5808346138	0.8580667	hsa:1373,CPS1,1373:up|hsa:4538,ND4,4538:down|hsa:3029,HAGH,3029:down|hsa:2043,EPHA4,2043:up|hsa:4537,ND3,4537:up	http://amigo.geneontology.org/cgi-bin/amigo/term_details?term=GO:0044429
intracellular part	Cellular Component	GO:0044424	74	12677	103	17517	0.718446601941748	0.723696980076497	0.5968861307	0.8667856	hsa:5999,RGS4,5999:down|hsa:154810,AMOTL1,154810:up|hsa:1850,DUSP8,1850:up|hsa:80321,CEP70,80321:up|hsa:10397,NDRG1,10397:up|hsa:54084,TSPEAR,54084:up|hsa:2043,EPHA4,2043:up|hsa:10978,CLP1,10978:up|hsa:79073,TMEM109,79073:down|hsa:9666,DZIP3,9666:up|hsa:2495,FTH1,2495:down|hsa:54925,ZSCAN32,54925:up|hsa:30011,SH3KBP1,30011:down|hsa:9722,NOS1AP,9722:up|hsa:5886,RAD23A,5886:down|hsa:153562,MARVELD2…	http://amigo.geneontology.org/cgi-bin/amigo/term_details?term=GO:0044424
mitochondrial matrix	Cellular Component	GO:0005759	2	341	103	17517	0.0194174757281553	0.0194668036764286	0.5988272125	0.8680281	hsa:1373,CPS1,1373:up|hsa:3029,HAGH,3029:down	http://amigo.geneontology.org/cgi-bin/amigo/term_details?term=GO:0005759
plasma membrane receptor complex	Cellular Component	GO:0098802	1	159	103	17517	0.00970873786407767	0.00907689672889193	0.6101319887	0.8738547	hsa:90,ACVR1,90:up	http://amigo.geneontology.org/cgi-bin/amigo/term_details?term=GO:0098802
spliceosomal complex	Cellular Component	GO:0005681	1	159	103	17517	0.00970873786407767	0.00907689672889193	0.6101319887	0.8738547	hsa:58509,CACTIN,58509:up	http://amigo.geneontology.org/cgi-bin/amigo/term_details?term=GO:0005681
neuronal cell body	Cellular Component	GO:0043025	2	349	103	17517	0.0194174757281553	0.0199235028829137	0.6115187706	0.8747964	hsa:56288,PARD3,56288:up|hsa:2043,EPHA4,2043:up	http://amigo.geneontology.org/cgi-bin/amigo/term_details?term=GO:0043025
endosome membrane	Cellular Component	GO:0010008	2	361	103	17517	0.0194174757281553	0.0206085516926414	0.6299863257	0.8886589	hsa:10397,NDRG1,10397:up|hsa:2043,EPHA4,2043:up	http://amigo.geneontology.org/cgi-bin/amigo/term_details?term=GO:0010008
transport vesicle	Cellular Component	GO:0030133	1	168	103	17517	0.00970873786407767	0.0095906833361877	0.6304699670	0.8886589	hsa:5864,RAB3A,5864:down	http://amigo.geneontology.org/cgi-bin/amigo/term_details?term=GO:0030133
somatodendritic compartment	Cellular Component	GO:0036477	3	558	103	17517	0.029126213592233	0.0318547696523377	0.6417051355	0.8932511	hsa:66004,LYNX1,66004:up|hsa:56288,PARD3,56288:up|hsa:2043,EPHA4,2043:up	http://amigo.geneontology.org/cgi-bin/amigo/term_details?term=GO:0036477
membrane region	Cellular Component	GO:0098589	9	1654	103	17517	0.087378640776699	0.0944225609408004	0.6462667872	0.8932759	hsa:6892,TAPBP,6892:up|hsa:57222,ERGIC1,57222:down|hsa:154810,AMOTL1,154810:up|hsa:153562,MARVELD2,153562:down|hsa:54084,TSPEAR,54084:up|hsa:4810,NHS,4810:down|hsa:79073,TMEM109,79073:down|hsa:257177,CFAP126,257177:down|hsa:9722,NOS1AP,9722:up	http://amigo.geneontology.org/cgi-bin/amigo/term_details?term=GO:0098589
nuclear speck	Cellular Component	GO:0016607	1	177	103	17517	0.00970873786407767	0.0101044699434835	0.6497567538	0.8932759	hsa:3091,HIF1A,3091:up	http://amigo.geneontology.org/cgi-bin/amigo/term_details?term=GO:0016607
primary cilium	Cellular Component	GO:0072372	1	177	103	17517	0.00970873786407767	0.0101044699434835	0.6497567538	0.8932759	hsa:257177,CFAP126,257177:down	http://amigo.geneontology.org/cgi-bin/amigo/term_details?term=GO:0072372
dendrite	Cellular Component	GO:0030425	2	377	103	17517	0.0194174757281553	0.0215219501056117	0.6535517513	0.8964109	hsa:66004,LYNX1,66004:up|hsa:2043,EPHA4,2043:up	http://amigo.geneontology.org/cgi-bin/amigo/term_details?term=GO:0030425
endosomal part	Cellular Component	GO:0044440	2	378	103	17517	0.0194174757281553	0.0215790375064223	0.6549847157	0.8966723	hsa:10397,NDRG1,10397:up|hsa:2043,EPHA4,2043:up	http://amigo.geneontology.org/cgi-bin/amigo/term_details?term=GO:0044440
basolateral plasma membrane	Cellular Component	GO:0016323	1	184	103	17517	0.00970873786407767	0.010504081749158	0.6640653936	0.9005613	hsa:153562,MARVELD2,153562:down	http://amigo.geneontology.org/cgi-bin/amigo/term_details?term=GO:0016323
condensed chromosome	Cellular Component	GO:0000793	1	186	103	17517	0.00970873786407767	0.0106182565507792	0.6680461758	0.9008672	hsa:56160,NDNL2,56160:up	http://amigo.geneontology.org/cgi-bin/amigo/term_details?term=GO:0000793
cytoskeletal part	Cellular Component	GO:0044430	7	1332	103	17517	0.0679611650485437	0.0760404178797739	0.6756340628	0.9032952	hsa:257177,CFAP126,257177:down|hsa:6161,RPL32,6161:down|hsa:80321,CEP70,80321:up|hsa:10397,NDRG1,10397:up|hsa:56288,PARD3,56288:up|hsa:199221,DZIP1L,199221:up|hsa:55930,MYO5C,55930:up	http://amigo.geneontology.org/cgi-bin/amigo/term_details?term=GO:0044430
coated vesicle	Cellular Component	GO:0030135	1	190	103	17517	0.00970873786407767	0.0108466061540218	0.6758681257	0.9032952	hsa:5864,RAB3A,5864:down	http://amigo.geneontology.org/cgi-bin/amigo/term_details?term=GO:0030135
cell body	Cellular Component	GO:0044297	2	398	103	17517	0.0194174757281553	0.0227207855226352	0.6826710704	0.9073285	hsa:56288,PARD3,56288:up|hsa:2043,EPHA4,2043:up	http://amigo.geneontology.org/cgi-bin/amigo/term_details?term=GO:0044297
postsynaptic membrane	Cellular Component	GO:0045211	1	195	103	17517	0.00970873786407767	0.011132043158075	0.6853893294	0.9088501	hsa:2043,EPHA4,2043:up	http://amigo.geneontology.org/cgi-bin/amigo/term_details?term=GO:0045211
cytoplasmic part	Cellular Component	GO:0044444	41	7304	103	17517	0.398058252427184	0.416966375520923	0.6865384415	0.9088501	hsa:5999,RGS4,5999:down|hsa:6202,RPS8,6202:down|hsa:6187,RPS2,6187:down|hsa:154810,AMOTL1,154810:up|hsa:80321,CEP70,80321:up|hsa:10397,NDRG1,10397:up|hsa:2043,EPHA4,2043:up|hsa:79073,TMEM109,79073:down|hsa:79856,SNX22,79856:down|hsa:2495,FTH1,2495:down|hsa:30011,SH3KBP1,30011:down|hsa:9722,NOS1AP,9722:up|hsa:23263,MCF2L,23263:down|hsa:153562,MARVELD2,153562:down|hsa:752,FMNL1,752:down|hsa:5864,RA…	http://amigo.geneontology.org/cgi-bin/amigo/term_details?term=GO:0044444
Golgi membrane	Cellular Component	GO:0000139	3	599	103	17517	0.029126213592233	0.034195353085574	0.6888886174	0.9088501	hsa:6892,TAPBP,6892:up|hsa:57222,ERGIC1,57222:down|hsa:8548,BLZF1,8548:up	http://amigo.geneontology.org/cgi-bin/amigo/term_details?term=GO:0000139
extracellular matrix	Cellular Component	GO:0031012	2	407	103	17517	0.0194174757281553	0.0232345721299309	0.6945329489	0.9121104	hsa:64856,VWA1,64856:up|hsa:4185,ADAM11,4185:up	http://amigo.geneontology.org/cgi-bin/amigo/term_details?term=GO:0031012
transferase complex, transferring phosphorus-containing groups	Cellular Component	GO:0061695	1	214	103	17517	0.00970873786407767	0.0122167037734772	0.7191103557	0.9148788	hsa:90,ACVR1,90:up	http://amigo.geneontology.org/cgi-bin/amigo/term_details?term=GO:0061695
actin cytoskeleton	Cellular Component	GO:0015629	2	429	103	17517	0.0194174757281553	0.024490494947765	0.7220087571	0.9148788	hsa:2274,FHL2,2274:up|hsa:55930,MYO5C,55930:up	http://amigo.geneontology.org/cgi-bin/amigo/term_details?term=GO:0015629
extracellular region	Cellular Component	GO:0005576	23	4282	103	17517	0.223300970873786	0.244448250271165	0.7268690861	0.9148788	hsa:6202,RPS8,6202:down|hsa:256933,NPB,256933:up|hsa:27299,ADAMDEC1,27299:down|hsa:6187,RPS2,6187:down|hsa:55023,PHIP,55023:up|hsa:10397,NDRG1,10397:up|hsa:84957,RELT,84957:up|hsa:54622,ARL15,54622:up|hsa:389816,LRRC26,389816:up|hsa:54084,TSPEAR,54084:up|hsa:79073,TMEM109,79073:down|hsa:64856,VWA1,64856:up|hsa:66004,LYNX1,66004:up|hsa:2495,FTH1,2495:down|hsa:3029,HAGH,3029:down|hsa:58509,CACTIN,5…	http://amigo.geneontology.org/cgi-bin/amigo/term_details?term=GO:0005576
whole membrane	Cellular Component	GO:0098805	12	2329	103	17517	0.116504854368932	0.132956556487983	0.7314461544	0.9170902	hsa:6892,TAPBP,6892:up|hsa:57222,ERGIC1,57222:down|hsa:154810,AMOTL1,154810:up|hsa:153562,MARVELD2,153562:down|hsa:10397,NDRG1,10397:up|hsa:54084,TSPEAR,54084:up|hsa:2043,EPHA4,2043:up|hsa:5864,RAB3A,5864:down|hsa:4810,NHS,4810:down|hsa:79073,TMEM109,79073:down|hsa:257177,CFAP126,257177:down|hsa:9722,NOS1AP,9722:up	http://amigo.geneontology.org/cgi-bin/amigo/term_details?term=GO:0098805
cytoplasmic membrane-bounded vesicle	Cellular Component	GO:0016023	5	1032	103	17517	0.0485436893203883	0.0589141976365816	0.7329623415	0.9170902	hsa:79856,SNX22,79856:down|hsa:23546,SYNGR4,23546:up|hsa:752,FMNL1,752:down|hsa:30011,SH3KBP1,30011:down|hsa:5864,RAB3A,5864:down	http://amigo.geneontology.org/cgi-bin/amigo/term_details?term=GO:0016023
endocytic vesicle	Cellular Component	GO:0030139	1	223	103	17517	0.00970873786407767	0.012730490380773	0.7338088162	0.9170902	hsa:752,FMNL1,752:down	http://amigo.geneontology.org/cgi-bin/amigo/term_details?term=GO:0030139
protein complex	Cellular Component	GO:0043234	21	3946	103	17517	0.203883495145631	0.22526688359879	0.7343987236	0.9170902	hsa:5999,RGS4,5999:down|hsa:154810,AMOTL1,154810:up|hsa:1373,CPS1,1373:up|hsa:90,ACVR1,90:up|hsa:10397,NDRG1,10397:up|hsa:389816,LRRC26,389816:up|hsa:10978,CLP1,10978:up|hsa:2495,FTH1,2495:down|hsa:56160,NDNL2,56160:up|hsa:9722,NOS1AP,9722:up|hsa:5886,RAD23A,5886:down|hsa:55930,MYO5C,55930:up|hsa:6892,TAPBP,6892:up|hsa:3091,HIF1A,3091:up|hsa:5864,RAB3A,5864:down|hsa:26019,UPF2,26019:up|hsa:4538,N…	http://amigo.geneontology.org/cgi-bin/amigo/term_details?term=GO:0043234
intracellular organelle part	Cellular Component	GO:0044446	41	7424	103	17517	0.398058252427184	0.423816863618199	0.7347405483	0.9170902	hsa:6202,RPS8,6202:down|hsa:6187,RPS2,6187:down|hsa:154810,AMOTL1,154810:up|hsa:80321,CEP70,80321:up|hsa:10397,NDRG1,10397:up|hsa:4291,MLF1,4291:up|hsa:2043,EPHA4,2043:up|hsa:10978,CLP1,10978:up|hsa:79073,TMEM109,79073:down|hsa:79856,SNX22,79856:down|hsa:257177,CFAP126,257177:down|hsa:23567,ZNF346,23567:up|hsa:30011,SH3KBP1,30011:down|hsa:9722,NOS1AP,9722:up|hsa:5886,RAD23A,5886:down|hsa:55930,MY…	http://amigo.geneontology.org/cgi-bin/amigo/term_details?term=GO:0044446
chromosomal region	Cellular Component	GO:0098687	1	225	103	17517	0.00970873786407767	0.0128446651823942	0.7369702401	0.9170902	hsa:56160,NDNL2,56160:up	http://amigo.geneontology.org/cgi-bin/amigo/term_details?term=GO:0098687
organelle part	Cellular Component	GO:0044422	42	7625	103	17517	0.407766990291262	0.435291431181138	0.7460318515	0.9195342	hsa:6202,RPS8,6202:down|hsa:6187,RPS2,6187:down|hsa:154810,AMOTL1,154810:up|hsa:80321,CEP70,80321:up|hsa:10397,NDRG1,10397:up|hsa:4291,MLF1,4291:up|hsa:54084,TSPEAR,54084:up|hsa:2043,EPHA4,2043:up|hsa:10978,CLP1,10978:up|hsa:79073,TMEM109,79073:down|hsa:79856,SNX22,79856:down|hsa:257177,CFAP126,257177:down|hsa:23567,ZNF346,23567:up|hsa:30011,SH3KBP1,30011:down|hsa:9722,NOS1AP,9722:up|hsa:5886,RAD…	http://amigo.geneontology.org/cgi-bin/amigo/term_details?term=GO:0044422
membrane	Cellular Component	GO:0016020	47	8479	103	17517	0.456310679611651	0.484044071473426	0.7462898816	0.9195342	hsa:5999,RGS4,5999:down|hsa:6202,RPS8,6202:down|hsa:10501,SEMA6B,10501:down|hsa:6187,RPS2,6187:down|hsa:154810,AMOTL1,154810:up|hsa:29933,GPR132,29933:up|hsa:90,ACVR1,90:up|hsa:80321,CEP70,80321:up|hsa:10397,NDRG1,10397:up|hsa:389816,LRRC26,389816:up|hsa:54084,TSPEAR,54084:up|hsa:2043,EPHA4,2043:up|hsa:4810,NHS,4810:down|hsa:79073,TMEM109,79073:down|hsa:79856,SNX22,79856:down|hsa:66004,LYNX1,6600…	http://amigo.geneontology.org/cgi-bin/amigo/term_details?term=GO:0016020
integral component of organelle membrane	Cellular Component	GO:0031301	1	233	103	17517	0.00970873786407767	0.0133013643888794	0.7492483779	0.9195342	hsa:6892,TAPBP,6892:up	http://amigo.geneontology.org/cgi-bin/amigo/term_details?term=GO:0031301
membrane raft	Cellular Component	GO:0045121	1	233	103	17517	0.00970873786407767	0.0133013643888794	0.7492483779	0.9195342	hsa:9722,NOS1AP,9722:up	http://amigo.geneontology.org/cgi-bin/amigo/term_details?term=GO:0045121
endoplasmic reticulum membrane	Cellular Component	GO:0005789	4	866	103	17517	0.0388349514563107	0.0494376891020152	0.7556428036	0.9195342	hsa:6892,TAPBP,6892:up|hsa:57222,ERGIC1,57222:down|hsa:9722,NOS1AP,9722:up|hsa:79073,TMEM109,79073:down	http://amigo.geneontology.org/cgi-bin/amigo/term_details?term=GO:0005789
nuclear lumen	Cellular Component	GO:0031981	17	3288	103	17517	0.16504854368932	0.187703373865388	0.7593130694	0.9198527	hsa:6187,RPS2,6187:down|hsa:1373,CPS1,1373:up|hsa:80321,CEP70,80321:up|hsa:4291,MLF1,4291:up|hsa:51667,NUB1,51667:up|hsa:10978,CLP1,10978:up|hsa:2274,FHL2,2274:up|hsa:23567,ZNF346,23567:up|hsa:58509,CACTIN,58509:up|hsa:5886,RAD23A,5886:down|hsa:51388,NIP7,51388:up|hsa:3091,HIF1A,3091:up|hsa:23473,CAPN7,23473:up|hsa:6143,RPL19,6143:down|hsa:2821,GPI,2821:up|hsa:8548,BLZF1,8548:up|hsa:64344,HIF3A,6…	http://amigo.geneontology.org/cgi-bin/amigo/term_details?term=GO:0031981
synaptic membrane	Cellular Component	GO:0097060	1	241	103	17517	0.00970873786407767	0.0137580635953645	0.7609586826	0.9198527	hsa:2043,EPHA4,2043:up	http://amigo.geneontology.org/cgi-bin/amigo/term_details?term=GO:0097060
postsynapse	Cellular Component	GO:0098794	1	245	103	17517	0.00970873786407767	0.0139864131986071	0.7666090740	0.9198527	hsa:2043,EPHA4,2043:up	http://amigo.geneontology.org/cgi-bin/amigo/term_details?term=GO:0098794
intrinsic component of organelle membrane	Cellular Component	GO:0031300	1	246	103	17517	0.00970873786407767	0.0140435005994177	0.7680008796	0.9198527	hsa:6892,TAPBP,6892:up	http://amigo.geneontology.org/cgi-bin/amigo/term_details?term=GO:0031300
nuclear outer membrane-endoplasmic reticulum membrane network	Cellular Component	GO:0042175	4	885	103	17517	0.0388349514563107	0.0505223497174174	0.7706037480	0.9206566	hsa:6892,TAPBP,6892:up|hsa:57222,ERGIC1,57222:down|hsa:9722,NOS1AP,9722:up|hsa:79073,TMEM109,79073:down	http://amigo.geneontology.org/cgi-bin/amigo/term_details?term=GO:0042175
catalytic complex	Cellular Component	GO:1902494	4	889	103	17517	0.0388349514563107	0.0507506993206599	0.7736619981	0.9224727	hsa:90,ACVR1,90:up|hsa:4538,ND4,4538:down|hsa:10978,CLP1,10978:up|hsa:4537,ND3,4537:up	http://amigo.geneontology.org/cgi-bin/amigo/term_details?term=GO:1902494
early endosome	Cellular Component	GO:0005769	1	254	103	17517	0.00970873786407767	0.0145001998059028	0.7788434143	0.9250757	hsa:2043,EPHA4,2043:up	http://amigo.geneontology.org/cgi-bin/amigo/term_details?term=GO:0005769
plasma membrane part	Cellular Component	GO:0044459	11	2239	103	17517	0.106796116504854	0.127818690415025	0.7808659774	0.9250757	hsa:154810,AMOTL1,154810:up|hsa:90,ACVR1,90:up|hsa:153562,MARVELD2,153562:down|hsa:389816,LRRC26,389816:up|hsa:54084,TSPEAR,54084:up|hsa:2043,EPHA4,2043:up|hsa:4810,NHS,4810:down|hsa:257177,CFAP126,257177:down|hsa:971,CD72,971:down|hsa:2709,GJB5,2709:down|hsa:9722,NOS1AP,9722:up	http://amigo.geneontology.org/cgi-bin/amigo/term_details?term=GO:0044459
cell projection membrane	Cellular Component	GO:0031253	1	265	103	17517	0.00970873786407767	0.0151281612148199	0.7929369005	0.9300873	hsa:54084,TSPEAR,54084:up	http://amigo.geneontology.org/cgi-bin/amigo/term_details?term=GO:0031253
endosome	Cellular Component	GO:0005768	3	716	103	17517	0.029126213592233	0.040874578980419	0.7979756036	0.9300873	hsa:10397,NDRG1,10397:up|hsa:2043,EPHA4,2043:up|hsa:5864,RAB3A,5864:down	http://amigo.geneontology.org/cgi-bin/amigo/term_details?term=GO:0005768
spindle	Cellular Component	GO:0005819	1	275	103	17517	0.00970873786407767	0.0156990352229263	0.8049753923	0.9329159	hsa:56288,PARD3,56288:up	http://amigo.geneontology.org/cgi-bin/amigo/term_details?term=GO:0005819
extracellular region part	Cellular Component	GO:0044421	18	3594	103	17517	0.174757281553398	0.205172118513444	0.8117097531	0.9345774	hsa:6202,RPS8,6202:down|hsa:6187,RPS2,6187:down|hsa:55023,PHIP,55023:up|hsa:10397,NDRG1,10397:up|hsa:84957,RELT,84957:up|hsa:54622,ARL15,54622:up|hsa:389816,LRRC26,389816:up|hsa:79073,TMEM109,79073:down|hsa:64856,VWA1,64856:up|hsa:66004,LYNX1,66004:up|hsa:2495,FTH1,2495:down|hsa:3029,HAGH,3029:down|hsa:58509,CACTIN,58509:up|hsa:55930,MYO5C,55930:up|hsa:23263,MCF2L,23263:down|hsa:752,FMNL1,752:dow…	http://amigo.geneontology.org/cgi-bin/amigo/term_details?term=GO:0044421
transcription factor complex	Cellular Component	GO:0005667	1	284	103	17517	0.00970873786407767	0.0162128218302221	0.8152159404	0.9359127	hsa:3091,HIF1A,3091:up	http://amigo.geneontology.org/cgi-bin/amigo/term_details?term=GO:0005667
bounding membrane of organelle	Cellular Component	GO:0098588	10	2125	103	17517	0.0970873786407767	0.121310726722612	0.8161439894	0.9359127	hsa:6892,TAPBP,6892:up|hsa:57222,ERGIC1,57222:down|hsa:10397,NDRG1,10397:up|hsa:54084,TSPEAR,54084:up|hsa:2043,EPHA4,2043:up|hsa:5864,RAB3A,5864:down|hsa:79073,TMEM109,79073:down|hsa:23546,SYNGR4,23546:up|hsa:9722,NOS1AP,9722:up|hsa:8548,BLZF1,8548:up	http://amigo.geneontology.org/cgi-bin/amigo/term_details?term=GO:0098588
receptor complex	Cellular Component	GO:0043235	1	294	103	17517	0.00970873786407767	0.0167836958383285	0.8259706764	0.9391831	hsa:90,ACVR1,90:up	http://amigo.geneontology.org/cgi-bin/amigo/term_details?term=GO:0043235
intracellular organelle	Cellular Component	GO:0043229	61	11068	103	17517	0.592233009708738	0.631843352172176	0.8262597216	0.9391831	hsa:6202,RPS8,6202:down|hsa:6187,RPS2,6187:down|hsa:154810,AMOTL1,154810:up|hsa:1850,DUSP8,1850:up|hsa:80321,CEP70,80321:up|hsa:9473,THEMIS2,9473:up|hsa:10397,NDRG1,10397:up|hsa:4291,MLF1,4291:up|hsa:389816,LRRC26,389816:up|hsa:54084,TSPEAR,54084:up|hsa:2043,EPHA4,2043:up|hsa:10978,CLP1,10978:up|hsa:79073,TMEM109,79073:down|hsa:79856,SNX22,79856:down|hsa:2495,FTH1,2495:down|hsa:257177,CFAP126,257…	http://amigo.geneontology.org/cgi-bin/amigo/term_details?term=GO:0043229
nucleoplasm	Cellular Component	GO:0005654	13	2722	103	17517	0.12621359223301	0.155391905006565	0.8300918974	0.9406663	hsa:6187,RPS2,6187:down|hsa:80321,CEP70,80321:up|hsa:3091,HIF1A,3091:up|hsa:4291,MLF1,4291:up|hsa:23473,CAPN7,23473:up|hsa:10978,CLP1,10978:up|hsa:2274,FHL2,2274:up|hsa:2821,GPI,2821:up|hsa:23567,ZNF346,23567:up|hsa:58509,CACTIN,58509:up|hsa:5886,RAD23A,5886:down|hsa:8548,BLZF1,8548:up|hsa:64344,HIF3A,64344:up	http://amigo.geneontology.org/cgi-bin/amigo/term_details?term=GO:0005654
mitochondrion	Cellular Component	GO:0005739	7	1588	103	17517	0.0679611650485437	0.090654792487298	0.8357463371	0.9416561	hsa:2495,FTH1,2495:down|hsa:1373,CPS1,1373:up|hsa:4538,ND4,4538:down|hsa:3029,HAGH,3029:down|hsa:9722,NOS1AP,9722:up|hsa:2043,EPHA4,2043:up|hsa:4537,ND3,4537:up	http://amigo.geneontology.org/cgi-bin/amigo/term_details?term=GO:0005739
secretory granule	Cellular Component	GO:0030141	1	308	103	17517	0.00970873786407767	0.0175829194496775	0.8399933465	0.9416561	hsa:5864,RAB3A,5864:down	http://amigo.geneontology.org/cgi-bin/amigo/term_details?term=GO:0030141
Golgi apparatus part	Cellular Component	GO:0044431	3	787	103	17517	0.029126213592233	0.0449277844379745	0.8473321773	0.9445864	hsa:6892,TAPBP,6892:up|hsa:57222,ERGIC1,57222:down|hsa:8548,BLZF1,8548:up	http://amigo.geneontology.org/cgi-bin/amigo/term_details?term=GO:0044431
nuclear body	Cellular Component	GO:0016604	1	327	103	17517	0.00970873786407767	0.0186675800650796	0.8572500819	0.9471472	hsa:3091,HIF1A,3091:up	http://amigo.geneontology.org/cgi-bin/amigo/term_details?term=GO:0016604
proteinaceous extracellular matrix	Cellular Component	GO:0005578	1	337	103	17517	0.00970873786407767	0.019238454073186	0.8655785922	0.9497726	hsa:64856,VWA1,64856:up	http://amigo.geneontology.org/cgi-bin/amigo/term_details?term=GO:0005578
endoplasmic reticulum part	Cellular Component	GO:0044432	4	1040	103	17517	0.0388349514563107	0.0593708968430667	0.8674584207	0.9497726	hsa:6892,TAPBP,6892:up|hsa:57222,ERGIC1,57222:down|hsa:9722,NOS1AP,9722:up|hsa:79073,TMEM109,79073:down	http://amigo.geneontology.org/cgi-bin/amigo/term_details?term=GO:0044432
cell	Cellular Component	GO:0005623	84	14900	103	17517	0.815533980582524	0.850602272078552	0.8713981353	0.9515659	hsa:5999,RGS4,5999:down|hsa:154810,AMOTL1,154810:up|hsa:29933,GPR132,29933:up|hsa:90,ACVR1,90:up|hsa:1850,DUSP8,1850:up|hsa:80321,CEP70,80321:up|hsa:10397,NDRG1,10397:up|hsa:54084,TSPEAR,54084:up|hsa:2043,EPHA4,2043:up|hsa:10978,CLP1,10978:up|hsa:79073,TMEM109,79073:down|hsa:9666,DZIP3,9666:up|hsa:66004,LYNX1,66004:up|hsa:2495,FTH1,2495:down|hsa:54925,ZSCAN32,54925:up|hsa:30011,SH3KBP1,30011:down…	http://amigo.geneontology.org/cgi-bin/amigo/term_details?term=GO:0005623
cell part	Cellular Component	GO:0044464	84	14900	103	17517	0.815533980582524	0.850602272078552	0.8713981353	0.9515659	hsa:5999,RGS4,5999:down|hsa:154810,AMOTL1,154810:up|hsa:29933,GPR132,29933:up|hsa:90,ACVR1,90:up|hsa:1850,DUSP8,1850:up|hsa:80321,CEP70,80321:up|hsa:10397,NDRG1,10397:up|hsa:54084,TSPEAR,54084:up|hsa:2043,EPHA4,2043:up|hsa:10978,CLP1,10978:up|hsa:79073,TMEM109,79073:down|hsa:9666,DZIP3,9666:up|hsa:66004,LYNX1,66004:up|hsa:2495,FTH1,2495:down|hsa:54925,ZSCAN32,54925:up|hsa:30011,SH3KBP1,30011:down…	http://amigo.geneontology.org/cgi-bin/amigo/term_details?term=GO:0044464
microtubule	Cellular Component	GO:0005874	1	366	103	17517	0.00970873786407767	0.0208939886966946	0.8871060635	0.9594984	hsa:10397,NDRG1,10397:up	http://amigo.geneontology.org/cgi-bin/amigo/term_details?term=GO:0005874
integral component of plasma membrane	Cellular Component	GO:0005887	5	1313	103	17517	0.0485436893203883	0.0749557572643718	0.8932216163	0.9630736	hsa:971,CD72,971:down|hsa:90,ACVR1,90:up|hsa:389816,LRRC26,389816:up|hsa:9722,NOS1AP,9722:up|hsa:2043,EPHA4,2043:up	http://amigo.geneontology.org/cgi-bin/amigo/term_details?term=GO:0005887
intracellular organelle lumen	Cellular Component	GO:0070013	18	3890	103	17517	0.174757281553398	0.222069989153394	0.9021818472	0.9644633	hsa:6187,RPS2,6187:down|hsa:1373,CPS1,1373:up|hsa:80321,CEP70,80321:up|hsa:4291,MLF1,4291:up|hsa:51667,NUB1,51667:up|hsa:10978,CLP1,10978:up|hsa:2274,FHL2,2274:up|hsa:23567,ZNF346,23567:up|hsa:3029,HAGH,3029:down|hsa:58509,CACTIN,58509:up|hsa:5886,RAD23A,5886:down|hsa:3091,HIF1A,3091:up|hsa:51388,NIP7,51388:up|hsa:23473,CAPN7,23473:up|hsa:6143,RPL19,6143:down|hsa:2821,GPI,2821:up|hsa:8548,BLZF1,8…	http://amigo.geneontology.org/cgi-bin/amigo/term_details?term=GO:0070013
nucleoplasm part	Cellular Component	GO:0044451	2	657	103	17517	0.0194174757281553	0.0375064223325912	0.9029150985	0.9644633	hsa:3091,HIF1A,3091:up|hsa:10978,CLP1,10978:up	http://amigo.geneontology.org/cgi-bin/amigo/term_details?term=GO:0044451
cell surface	Cellular Component	GO:0009986	2	665	103	17517	0.0194174757281553	0.0379631215390763	0.9066226598	0.9644633	hsa:54084,TSPEAR,54084:up|hsa:2043,EPHA4,2043:up	http://amigo.geneontology.org/cgi-bin/amigo/term_details?term=GO:0009986
side of membrane	Cellular Component	GO:0098552	1	398	103	17517	0.00970873786407767	0.0227207855226352	0.9069144405	0.9644633	hsa:6892,TAPBP,6892:up	http://amigo.geneontology.org/cgi-bin/amigo/term_details?term=GO:0098552
intrinsic component of plasma membrane	Cellular Component	GO:0031226	5	1363	103	17517	0.0485436893203883	0.0778101273049038	0.9108385450	0.9647532	hsa:971,CD72,971:down|hsa:90,ACVR1,90:up|hsa:389816,LRRC26,389816:up|hsa:9722,NOS1AP,9722:up|hsa:2043,EPHA4,2043:up	http://amigo.geneontology.org/cgi-bin/amigo/term_details?term=GO:0031226
organelle lumen	Cellular Component	GO:0043233	18	3945	103	17517	0.174757281553398	0.225209796197979	0.9144411012	0.9647532	hsa:6187,RPS2,6187:down|hsa:1373,CPS1,1373:up|hsa:80321,CEP70,80321:up|hsa:4291,MLF1,4291:up|hsa:51667,NUB1,51667:up|hsa:10978,CLP1,10978:up|hsa:2274,FHL2,2274:up|hsa:23567,ZNF346,23567:up|hsa:3029,HAGH,3029:down|hsa:58509,CACTIN,58509:up|hsa:5886,RAD23A,5886:down|hsa:3091,HIF1A,3091:up|hsa:51388,NIP7,51388:up|hsa:23473,CAPN7,23473:up|hsa:6143,RPL19,6143:down|hsa:2821,GPI,2821:up|hsa:8548,BLZF1,8…	http://amigo.geneontology.org/cgi-bin/amigo/term_details?term=GO:0043233
organelle	Cellular Component	GO:0043226	65	12080	103	17517	0.631067961165049	0.689615801792544	0.9168436952	0.9647532	hsa:154810,AMOTL1,154810:up|hsa:1850,DUSP8,1850:up|hsa:80321,CEP70,80321:up|hsa:10397,NDRG1,10397:up|hsa:54084,TSPEAR,54084:up|hsa:2043,EPHA4,2043:up|hsa:10978,CLP1,10978:up|hsa:79073,TMEM109,79073:down|hsa:66004,LYNX1,66004:up|hsa:2495,FTH1,2495:down|hsa:54925,ZSCAN32,54925:up|hsa:30011,SH3KBP1,30011:down|hsa:9722,NOS1AP,9722:up|hsa:5886,RAD23A,5886:down|hsa:153562,MARVELD2,153562:down|hsa:752,F…	http://amigo.geneontology.org/cgi-bin/amigo/term_details?term=GO:0043226
membrane-enclosed lumen	Cellular Component	GO:0031974	18	4001	103	17517	0.174757281553398	0.228406690643375	0.9256346298	0.9658971	hsa:6187,RPS2,6187:down|hsa:1373,CPS1,1373:up|hsa:80321,CEP70,80321:up|hsa:4291,MLF1,4291:up|hsa:51667,NUB1,51667:up|hsa:10978,CLP1,10978:up|hsa:2274,FHL2,2274:up|hsa:23567,ZNF346,23567:up|hsa:3029,HAGH,3029:down|hsa:58509,CACTIN,58509:up|hsa:5886,RAD23A,5886:down|hsa:3091,HIF1A,3091:up|hsa:51388,NIP7,51388:up|hsa:23473,CAPN7,23473:up|hsa:6143,RPL19,6143:down|hsa:2821,GPI,2821:up|hsa:8548,BLZF1,8…	http://amigo.geneontology.org/cgi-bin/amigo/term_details?term=GO:0031974
endoplasmic reticulum	Cellular Component	GO:0005783	5	1461	103	17517	0.0485436893203883	0.0834046925843466	0.9382072209	0.9739330	hsa:6892,TAPBP,6892:up|hsa:57222,ERGIC1,57222:down|hsa:9722,NOS1AP,9722:up|hsa:2043,EPHA4,2043:up|hsa:79073,TMEM109,79073:down	http://amigo.geneontology.org/cgi-bin/amigo/term_details?term=GO:0005783
intrinsic component of membrane	Cellular Component	GO:0031224	24	5258	103	17517	0.233009708737864	0.300165553462351	0.9479805075	0.9802609	hsa:10501,SEMA6B,10501:down|hsa:57222,ERGIC1,57222:down|hsa:29933,GPR132,29933:up|hsa:90,ACVR1,90:up|hsa:84957,RELT,84957:up|hsa:390036,OR52K1,390036:up|hsa:389816,LRRC26,389816:up|hsa:2043,EPHA4,2043:up|hsa:79073,TMEM109,79073:down|hsa:66004,LYNX1,66004:up|hsa:56063,TMEM234,56063:up|hsa:971,CD72,971:down|hsa:199953,TMEM201,199953:down|hsa:9722,NOS1AP,9722:up|hsa:6892,TAPBP,6892:up|hsa:4185,ADAM1…	http://amigo.geneontology.org/cgi-bin/amigo/term_details?term=GO:0031224
integral component of membrane	Cellular Component	GO:0016021	23	5144	103	17517	0.223300970873786	0.293657589769938	0.9566651486	0.9845730	hsa:10501,SEMA6B,10501:down|hsa:57222,ERGIC1,57222:down|hsa:29933,GPR132,29933:up|hsa:90,ACVR1,90:up|hsa:84957,RELT,84957:up|hsa:390036,OR52K1,390036:up|hsa:389816,LRRC26,389816:up|hsa:2043,EPHA4,2043:up|hsa:79073,TMEM109,79073:down|hsa:56063,TMEM234,56063:up|hsa:971,CD72,971:down|hsa:199953,TMEM201,199953:down|hsa:9722,NOS1AP,9722:up|hsa:6892,TAPBP,6892:up|hsa:4185,ADAM11,4185:up|hsa:153562,MARV…	http://amigo.geneontology.org/cgi-bin/amigo/term_details?term=GO:0016021
Golgi apparatus	Cellular Component	GO:0005794	4	1331	103	17517	0.0388349514563107	0.0759833304789633	0.9586036127	0.9849657	hsa:6892,TAPBP,6892:up|hsa:57222,ERGIC1,57222:down|hsa:2043,EPHA4,2043:up|hsa:8548,BLZF1,8548:up	http://amigo.geneontology.org/cgi-bin/amigo/term_details?term=GO:0005794
membrane-bounded organelle	Cellular Component	GO:0043227	58	11238	103	17517	0.563106796116505	0.641548210309985	0.9600591308	0.9849657	hsa:6202,RPS8,6202:down|hsa:6187,RPS2,6187:down|hsa:154810,AMOTL1,154810:up|hsa:1850,DUSP8,1850:up|hsa:80321,CEP70,80321:up|hsa:9473,THEMIS2,9473:up|hsa:10397,NDRG1,10397:up|hsa:54622,ARL15,54622:up|hsa:4291,MLF1,4291:up|hsa:389816,LRRC26,389816:up|hsa:54084,TSPEAR,54084:up|hsa:2043,EPHA4,2043:up|hsa:10978,CLP1,10978:up|hsa:79073,TMEM109,79073:down|hsa:79856,SNX22,79856:down|hsa:66004,LYNX1,66004…	http://amigo.geneontology.org/cgi-bin/amigo/term_details?term=GO:0043227
intracellular membrane-bounded organelle	Cellular Component	GO:0043231	51	10095	103	17517	0.495145631067961	0.576297311183422	0.9611386220	0.9853725	hsa:6202,RPS8,6202:down|hsa:6187,RPS2,6187:down|hsa:154810,AMOTL1,154810:up|hsa:1850,DUSP8,1850:up|hsa:80321,CEP70,80321:up|hsa:9473,THEMIS2,9473:up|hsa:10397,NDRG1,10397:up|hsa:4291,MLF1,4291:up|hsa:2043,EPHA4,2043:up|hsa:10978,CLP1,10978:up|hsa:79073,TMEM109,79073:down|hsa:79856,SNX22,79856:down|hsa:2495,FTH1,2495:down|hsa:54925,ZSCAN32,54925:up|hsa:23567,ZNF346,23567:up|hsa:30011,SH3KBP1,30011…	http://amigo.geneontology.org/cgi-bin/amigo/term_details?term=GO:0043231
transferase complex	Cellular Component	GO:1990234	1	582	103	17517	0.00970873786407767	0.0332248672717931	0.9695189528	0.9878440	hsa:90,ACVR1,90:up	http://amigo.geneontology.org/cgi-bin/amigo/term_details?term=GO:1990234
membrane part	Cellular Component	GO:0044425	28	6250	103	17517	0.271844660194175	0.356796255066507	0.9738160498	0.9894842	hsa:10501,SEMA6B,10501:down|hsa:57222,ERGIC1,57222:down|hsa:154810,AMOTL1,154810:up|hsa:29933,GPR132,29933:up|hsa:90,ACVR1,90:up|hsa:84957,RELT,84957:up|hsa:390036,OR52K1,390036:up|hsa:389816,LRRC26,389816:up|hsa:54084,TSPEAR,54084:up|hsa:2043,EPHA4,2043:up|hsa:4810,NHS,4810:down|hsa:79073,TMEM109,79073:down|hsa:66004,LYNX1,66004:up|hsa:257177,CFAP126,257177:down|hsa:56063,TMEM234,56063:up|hsa:97…	http://amigo.geneontology.org/cgi-bin/amigo/term_details?term=GO:0044425
extracellular space	Cellular Component	GO:0005615	3	1189	103	17517	0.029126213592233	0.0678769195638523	0.9742232908	0.9894842	hsa:64856,VWA1,64856:up|hsa:2821,GPI,2821:up|hsa:23263,MCF2L,23263:down	http://amigo.geneontology.org/cgi-bin/amigo/term_details?term=GO:0005615
chromosomal part	Cellular Component	GO:0044427	1	686	103	17517	0.00970873786407767	0.0391619569560998	0.9838697848	0.9942307	hsa:56160,NDNL2,56160:up	http://amigo.geneontology.org/cgi-bin/amigo/term_details?term=GO:0044427
endomembrane system	Cellular Component	GO:0012505	12	3421	103	17517	0.116504854368932	0.195295998173203	0.9882481298	0.9965562	hsa:6892,TAPBP,6892:up|hsa:57222,ERGIC1,57222:down|hsa:80321,CEP70,80321:up|hsa:10397,NDRG1,10397:up|hsa:2043,EPHA4,2043:up|hsa:5864,RAB3A,5864:down|hsa:79073,TMEM109,79073:down|hsa:10553,HTATIP2,10553:down|hsa:199953,TMEM201,199953:down|hsa:9722,NOS1AP,9722:up|hsa:56288,PARD3,56288:up|hsa:8548,BLZF1,8548:up	http://amigo.geneontology.org/cgi-bin/amigo/term_details?term=GO:0012505
chromosome	Cellular Component	GO:0005694	1	779	103	17517	0.00970873786407767	0.0444710852314894	0.9909002544	0.9979470	hsa:56160,NDNL2,56160:up	http://amigo.geneontology.org/cgi-bin/amigo/term_details?term=GO:0005694
cellular_component	Cellular Component	GO:0005575	92	16680	103	17517	0.893203883495146	0.952217845521493	0.9963093260	0.9979470	hsa:5999,RGS4,5999:down|hsa:27299,ADAMDEC1,27299:down|hsa:154810,AMOTL1,154810:up|hsa:29933,GPR132,29933:up|hsa:90,ACVR1,90:up|hsa:1850,DUSP8,1850:up|hsa:80321,CEP70,80321:up|hsa:10397,NDRG1,10397:up|hsa:54084,TSPEAR,54084:up|hsa:2043,EPHA4,2043:up|hsa:10978,CLP1,10978:up|hsa:79073,TMEM109,79073:down|hsa:9666,DZIP3,9666:up|hsa:66004,LYNX1,66004:up|hsa:2495,FTH1,2495:down|hsa:54925,ZSCAN32,54925:u…	http://amigo.geneontology.org/cgi-bin/amigo/term_details?term=GO:0005575

## Sheet: Biological Process
Term	Database	ID	Input number	Background number	All input number	All background number	Input frequency	Background frequency	P-Value	Corrected P-Value	Input	Hyperlink
nuclear-transcribed mRNA catabolic process, nonsense-mediated decay	Biological Process	GO:0000184	5	116	103	17517	0.0485436893203883	0.00662213849403437	0.0006099726	0.3616955	hsa:6202,RPS8,6202:down|hsa:6143,RPL19,6143:down|hsa:26019,UPF2,26019:up|hsa:6187,RPS2,6187:down|hsa:6161,RPL32,6161:down	http://amigo.geneontology.org/cgi-bin/amigo/term_details?term=GO:0000184
nuclear-transcribed mRNA catabolic process	Biological Process	GO:0000956	6	185	103	17517	0.058252427184466	0.0105611691499686	0.0007838535	0.3616955	hsa:6202,RPS8,6202:down|hsa:6143,RPL19,6143:down|hsa:26019,UPF2,26019:up|hsa:6187,RPS2,6187:down|hsa:339345,NANOS2,339345:up|hsa:6161,RPL32,6161:down	http://amigo.geneontology.org/cgi-bin/amigo/term_details?term=GO:0000956
mRNA catabolic process	Biological Process	GO:0006402	6	198	103	17517	0.058252427184466	0.0113033053605069	0.0011142498	0.3616955	hsa:6202,RPS8,6202:down|hsa:6143,RPL19,6143:down|hsa:26019,UPF2,26019:up|hsa:6187,RPS2,6187:down|hsa:339345,NANOS2,339345:up|hsa:6161,RPL32,6161:down	http://amigo.geneontology.org/cgi-bin/amigo/term_details?term=GO:0006402
RNA catabolic process	Biological Process	GO:0006401	6	226	103	17517	0.058252427184466	0.0129017525832049	0.0021809678	0.3616955	hsa:6202,RPS8,6202:down|hsa:6143,RPL19,6143:down|hsa:26019,UPF2,26019:up|hsa:6187,RPS2,6187:down|hsa:339345,NANOS2,339345:up|hsa:6161,RPL32,6161:down	http://amigo.geneontology.org/cgi-bin/amigo/term_details?term=GO:0006401
SRP-dependent cotranslational protein targeting to membrane	Biological Process	GO:0006614	4	104	103	17517	0.0388349514563107	0.00593708968430667	0.0033056627	0.3616955	hsa:6202,RPS8,6202:down|hsa:6143,RPL19,6143:down|hsa:6187,RPS2,6187:down|hsa:6161,RPL32,6161:down	http://amigo.geneontology.org/cgi-bin/amigo/term_details?term=GO:0006614
cotranslational protein targeting to membrane	Biological Process	GO:0006613	4	106	103	17517	0.0388349514563107	0.00605126448592796	0.0035396146	0.3616955	hsa:6202,RPS8,6202:down|hsa:6143,RPL19,6143:down|hsa:6187,RPS2,6187:down|hsa:6161,RPL32,6161:down	http://amigo.geneontology.org/cgi-bin/amigo/term_details?term=GO:0006613
protein targeting to ER	Biological Process	GO:0045047	4	108	103	17517	0.0388349514563107	0.00616543928754924	0.0037845833	0.3616955	hsa:6202,RPS8,6202:down|hsa:6143,RPL19,6143:down|hsa:6187,RPS2,6187:down|hsa:6161,RPL32,6161:down	http://amigo.geneontology.org/cgi-bin/amigo/term_details?term=GO:0045047
protein targeting to membrane	Biological Process	GO:0006612	5	179	103	17517	0.0485436893203883	0.0102186447451048	0.0041173291	0.3616955	hsa:6202,RPS8,6202:down|hsa:6143,RPL19,6143:down|hsa:6187,RPS2,6187:down|hsa:6161,RPL32,6161:down|hsa:56288,PARD3,56288:up	http://amigo.geneontology.org/cgi-bin/amigo/term_details?term=GO:0006612
establishment of protein localization to endoplasmic reticulum	Biological Process	GO:0072599	4	112	103	17517	0.0388349514563107	0.0063937888907918	0.0043085360	0.3616955	hsa:6202,RPS8,6202:down|hsa:6143,RPL19,6143:down|hsa:6187,RPS2,6187:down|hsa:6161,RPL32,6161:down	http://amigo.geneontology.org/cgi-bin/amigo/term_details?term=GO:0072599
positive regulation of nitric-oxide synthase activity	Biological Process	GO:0051000	2	19	103	17517	0.0194174757281553	0.00108466061540218	0.0054853232	0.3616955	hsa:3091,HIF1A,3091:up|hsa:9722,NOS1AP,9722:up	http://amigo.geneontology.org/cgi-bin/amigo/term_details?term=GO:0051000
positive regulation of ventricular cardiac muscle cell action potential	Biological Process	GO:1903947	1	1	103	17517	0.00970873786407767	5.70874008106411e-05	0.0058800023	0.3616955	hsa:9722,NOS1AP,9722:up	http://amigo.geneontology.org/cgi-bin/amigo/term_details?term=GO:1903947
positive regulation of Rho guanyl-nucleotide exchange factor activity	Biological Process	GO:2001108	1	1	103	17517	0.00970873786407767	5.70874008106411e-05	0.0058800023	0.3616955	hsa:2043,EPHA4,2043:up	http://amigo.geneontology.org/cgi-bin/amigo/term_details?term=GO:2001108
U6 snRNA 3'-end processing	Biological Process	GO:0034477	1	1	103	17517	0.00970873786407767	5.70874008106411e-05	0.0058800023	0.3616955	hsa:79650,USB1,79650:up	http://amigo.geneontology.org/cgi-bin/amigo/term_details?term=GO:0034477
endocardial cushion cell fate commitment	Biological Process	GO:0061445	1	1	103	17517	0.00970873786407767	5.70874008106411e-05	0.0058800023	0.3616955	hsa:90,ACVR1,90:up	http://amigo.geneontology.org/cgi-bin/amigo/term_details?term=GO:0061445
positive regulation of nitric oxide mediated signal transduction	Biological Process	GO:0010750	1	1	103	17517	0.00970873786407767	5.70874008106411e-05	0.0058800023	0.3616955	hsa:9722,NOS1AP,9722:up	http://amigo.geneontology.org/cgi-bin/amigo/term_details?term=GO:0010750
methylglyoxal biosynthetic process	Biological Process	GO:0019242	1	1	103	17517	0.00970873786407767	5.70874008106411e-05	0.0058800023	0.3616955	hsa:2821,GPI,2821:up	http://amigo.geneontology.org/cgi-bin/amigo/term_details?term=GO:0019242
positive regulation of voltage-gated potassium channel activity involved in ventricular cardiac muscle cell action potential repolarization	Biological Process	GO:1903762	1	1	103	17517	0.00970873786407767	5.70874008106411e-05	0.0058800023	0.3616955	hsa:9722,NOS1AP,9722:up	http://amigo.geneontology.org/cgi-bin/amigo/term_details?term=GO:1903762
maintenance of presynaptic active zone structure	Biological Process	GO:0048790	1	1	103	17517	0.00970873786407767	5.70874008106411e-05	0.0058800023	0.3616955	hsa:5864,RAB3A,5864:down	http://amigo.geneontology.org/cgi-bin/amigo/term_details?term=GO:0048790
neural fold elevation formation	Biological Process	GO:0021502	1	1	103	17517	0.00970873786407767	5.70874008106411e-05	0.0058800023	0.3616955	hsa:3091,HIF1A,3091:up	http://amigo.geneontology.org/cgi-bin/amigo/term_details?term=GO:0021502
regulation of Rho guanyl-nucleotide exchange factor activity	Biological Process	GO:2001106	1	1	103	17517	0.00970873786407767	5.70874008106411e-05	0.0058800023	0.3616955	hsa:2043,EPHA4,2043:up	http://amigo.geneontology.org/cgi-bin/amigo/term_details?term=GO:2001106
peptide stabilization	Biological Process	GO:0050822	1	1	103	17517	0.00970873786407767	5.70874008106411e-05	0.0058800023	0.3616955	hsa:6892,TAPBP,6892:up	http://amigo.geneontology.org/cgi-bin/amigo/term_details?term=GO:0050822
peptide antigen stabilization	Biological Process	GO:0050823	1	1	103	17517	0.00970873786407767	5.70874008106411e-05	0.0058800023	0.3616955	hsa:6892,TAPBP,6892:up	http://amigo.geneontology.org/cgi-bin/amigo/term_details?term=GO:0050823
endocardial cell fate commitment	Biological Process	GO:0060957	1	1	103	17517	0.00970873786407767	5.70874008106411e-05	0.0058800023	0.3616955	hsa:90,ACVR1,90:up	http://amigo.geneontology.org/cgi-bin/amigo/term_details?term=GO:0060957
regulation of voltage-gated potassium channel activity involved in ventricular cardiac muscle cell action potential repolarization	Biological Process	GO:1903760	1	1	103	17517	0.00970873786407767	5.70874008106411e-05	0.0058800023	0.3616955	hsa:9722,NOS1AP,9722:up	http://amigo.geneontology.org/cgi-bin/amigo/term_details?term=GO:1903760
protein localization to endoplasmic reticulum	Biological Process	GO:0070972	4	130	103	17517	0.0388349514563107	0.00742136210538334	0.0072732038	0.3994086	hsa:6202,RPS8,6202:down|hsa:6143,RPL19,6143:down|hsa:6187,RPS2,6187:down|hsa:6161,RPL32,6161:down	http://amigo.geneontology.org/cgi-bin/amigo/term_details?term=GO:0070972
peripheral nervous system axon ensheathment	Biological Process	GO:0032292	2	22	103	17517	0.0194174757281553	0.0012559228178341	0.0073255439	0.3994086	hsa:10397,NDRG1,10397:up|hsa:56288,PARD3,56288:up	http://amigo.geneontology.org/cgi-bin/amigo/term_details?term=GO:0032292
myelination in peripheral nervous system	Biological Process	GO:0022011	2	22	103	17517	0.0194174757281553	0.0012559228178341	0.0073255439	0.3994086	hsa:10397,NDRG1,10397:up|hsa:56288,PARD3,56288:up	http://amigo.geneontology.org/cgi-bin/amigo/term_details?term=GO:0022011
mRNA metabolic process	Biological Process	GO:0016071	9	592	103	17517	0.087378640776699	0.0337957412798995	0.0081268335	0.4005098	hsa:6202,RPS8,6202:down|hsa:6187,RPS2,6187:down|hsa:339345,NANOS2,339345:up|hsa:6161,RPL32,6161:down|hsa:10978,CLP1,10978:up|hsa:6143,RPL19,6143:down|hsa:26019,UPF2,26019:up|hsa:58509,CACTIN,58509:up|hsa:79650,USB1,79650:up	http://amigo.geneontology.org/cgi-bin/amigo/term_details?term=GO:0016071
peptidyl-threonine phosphorylation	Biological Process	GO:0018107	3	71	103	17517	0.029126213592233	0.00405320545755552	0.0084494668	0.4005098	hsa:55023,PHIP,55023:up|hsa:90,ACVR1,90:up|hsa:56288,PARD3,56288:up	http://amigo.geneontology.org/cgi-bin/amigo/term_details?term=GO:0018107
Schwann cell development	Biological Process	GO:0014044	2	25	103	17517	0.0194174757281553	0.00142718502026603	0.0094054094	0.4005098	hsa:10397,NDRG1,10397:up|hsa:56288,PARD3,56288:up	http://amigo.geneontology.org/cgi-bin/amigo/term_details?term=GO:0014044
peptidyl-threonine modification	Biological Process	GO:0018210	3	75	103	17517	0.029126213592233	0.00428155506079808	0.0098155758	0.4005098	hsa:55023,PHIP,55023:up|hsa:90,ACVR1,90:up|hsa:56288,PARD3,56288:up	http://amigo.geneontology.org/cgi-bin/amigo/term_details?term=GO:0018210
positive regulation of monooxygenase activity	Biological Process	GO:0032770	2	26	103	17517	0.0194174757281553	0.00148427242107667	0.0101504237	0.4005098	hsa:3091,HIF1A,3091:up|hsa:9722,NOS1AP,9722:up	http://amigo.geneontology.org/cgi-bin/amigo/term_details?term=GO:0032770
establishment of protein localization to membrane	Biological Process	GO:0090150	6	318	103	17517	0.058252427184466	0.0181537934577839	0.0112247600	0.4005098	hsa:6202,RPS8,6202:down|hsa:6143,RPL19,6143:down|hsa:6187,RPS2,6187:down|hsa:6161,RPL32,6161:down|hsa:56288,PARD3,56288:up|hsa:8548,BLZF1,8548:up	http://amigo.geneontology.org/cgi-bin/amigo/term_details?term=GO:0090150
intracellular sequestering of iron ion	Biological Process	GO:0006880	1	2	103	17517	0.00970873786407767	0.000114174801621282	0.0117257639	0.4005098	hsa:2495,FTH1,2495:down	http://amigo.geneontology.org/cgi-bin/amigo/term_details?term=GO:0006880
carbamoyl phosphate metabolic process	Biological Process	GO:0070408	1	2	103	17517	0.00970873786407767	0.000114174801621282	0.0117257639	0.4005098	hsa:1373,CPS1,1373:up	http://amigo.geneontology.org/cgi-bin/amigo/term_details?term=GO:0070408
positive regulation of peptidyl-cysteine S-nitrosylation	Biological Process	GO:2000170	1	2	103	17517	0.00970873786407767	0.000114174801621282	0.0117257639	0.4005098	hsa:9722,NOS1AP,9722:up	http://amigo.geneontology.org/cgi-bin/amigo/term_details?term=GO:2000170
fasciculation of motor neuron axon	Biological Process	GO:0097156	1	2	103	17517	0.00970873786407767	0.000114174801621282	0.0117257639	0.4005098	hsa:2043,EPHA4,2043:up	http://amigo.geneontology.org/cgi-bin/amigo/term_details?term=GO:0097156
regulation of membrane repolarization during action potential	Biological Process	GO:0098903	1	2	103	17517	0.00970873786407767	0.000114174801621282	0.0117257639	0.4005098	hsa:9722,NOS1AP,9722:up	http://amigo.geneontology.org/cgi-bin/amigo/term_details?term=GO:0098903
establishment of cell polarity involved in ameboidal cell migration	Biological Process	GO:0003365	1	2	103	17517	0.00970873786407767	0.000114174801621282	0.0117257639	0.4005098	hsa:154810,AMOTL1,154810:up	http://amigo.geneontology.org/cgi-bin/amigo/term_details?term=GO:0003365
siRNA loading onto RISC involved in RNA interference	Biological Process	GO:0035087	1	2	103	17517	0.00970873786407767	0.000114174801621282	0.0117257639	0.4005098	hsa:10978,CLP1,10978:up	http://amigo.geneontology.org/cgi-bin/amigo/term_details?term=GO:0035087
sequestering of iron ion	Biological Process	GO:0097577	1	2	103	17517	0.00970873786407767	0.000114174801621282	0.0117257639	0.4005098	hsa:2495,FTH1,2495:down	http://amigo.geneontology.org/cgi-bin/amigo/term_details?term=GO:0097577
endocardial cushion cell differentiation	Biological Process	GO:0061443	1	2	103	17517	0.00970873786407767	0.000114174801621282	0.0117257639	0.4005098	hsa:90,ACVR1,90:up	http://amigo.geneontology.org/cgi-bin/amigo/term_details?term=GO:0061443
carbamoyl phosphate biosynthetic process	Biological Process	GO:0070409	1	2	103	17517	0.00970873786407767	0.000114174801621282	0.0117257639	0.4005098	hsa:1373,CPS1,1373:up	http://amigo.geneontology.org/cgi-bin/amigo/term_details?term=GO:0070409
inactivation of MAPK activity	Biological Process	GO:0000188	2	29	103	17517	0.0194174757281553	0.00165553462350859	0.0125361577	0.4005098	hsa:5999,RGS4,5999:down|hsa:1850,DUSP8,1850:up	http://amigo.geneontology.org/cgi-bin/amigo/term_details?term=GO:0000188
regulation of transcription from RNA polymerase II promoter in response to hypoxia	Biological Process	GO:0061418	2	29	103	17517	0.0194174757281553	0.00165553462350859	0.0125361577	0.4005098	hsa:3091,HIF1A,3091:up|hsa:64344,HIF3A,64344:up	http://amigo.geneontology.org/cgi-bin/amigo/term_details?term=GO:0061418
regulation of peptidyl-threonine phosphorylation	Biological Process	GO:0010799	2	30	103	17517	0.0194174757281553	0.00171262202431923	0.0133805834	0.4005098	hsa:55023,PHIP,55023:up|hsa:56288,PARD3,56288:up	http://amigo.geneontology.org/cgi-bin/amigo/term_details?term=GO:0010799
positive regulation of epithelial cell migration	Biological Process	GO:0010634	3	86	103	17517	0.029126213592233	0.00490951646971513	0.0142035495	0.4005098	hsa:154810,AMOTL1,154810:up|hsa:3091,HIF1A,3091:up|hsa:23473,CAPN7,23473:up	http://amigo.geneontology.org/cgi-bin/amigo/term_details?term=GO:0010634
nucleobase-containing compound catabolic process	Biological Process	GO:0034655	7	435	103	17517	0.0679611650485437	0.0248330193526289	0.0142931567	0.4005098	hsa:6202,RPS8,6202:down|hsa:6143,RPL19,6143:down|hsa:26019,UPF2,26019:up|hsa:6187,RPS2,6187:down|hsa:339345,NANOS2,339345:up|hsa:6161,RPL32,6161:down|hsa:3091,HIF1A,3091:up	http://amigo.geneontology.org/cgi-bin/amigo/term_details?term=GO:0034655
Schwann cell differentiation	Biological Process	GO:0014037	2	33	103	17517	0.0194174757281553	0.00188388422675116	0.0160570739	0.4005098	hsa:10397,NDRG1,10397:up|hsa:56288,PARD3,56288:up	http://amigo.geneontology.org/cgi-bin/amigo/term_details?term=GO:0014037
hippo signaling	Biological Process	GO:0035329	2	34	103	17517	0.0194174757281553	0.0019409716275618	0.0169959624	0.4005098	hsa:55841,WWC3,55841:up|hsa:154810,AMOTL1,154810:up	http://amigo.geneontology.org/cgi-bin/amigo/term_details?term=GO:0035329
positive regulation of determination of dorsal identity	Biological Process	GO:2000017	1	3	103	17517	0.00970873786407767	0.000171262202431923	0.0175374822	0.4005098	hsa:90,ACVR1,90:up	http://amigo.geneontology.org/cgi-bin/amigo/term_details?term=GO:2000017
fasciculation of sensory neuron axon	Biological Process	GO:0097155	1	3	103	17517	0.00970873786407767	0.000171262202431923	0.0175374822	0.4005098	hsa:2043,EPHA4,2043:up	http://amigo.geneontology.org/cgi-bin/amigo/term_details?term=GO:0097155
regulation of synaptic vesicle fusion to presynaptic membrane	Biological Process	GO:0031630	1	3	103	17517	0.00970873786407767	0.000171262202431923	0.0175374822	0.4005098	hsa:5864,RAB3A,5864:down	http://amigo.geneontology.org/cgi-bin/amigo/term_details?term=GO:0031630
atrial cardiac muscle cell development	Biological Process	GO:0055014	1	3	103	17517	0.00970873786407767	0.000171262202431923	0.0175374822	0.4005098	hsa:2274,FHL2,2274:up	http://amigo.geneontology.org/cgi-bin/amigo/term_details?term=GO:0055014
targeting of mRNA for destruction involved in RNA interference	Biological Process	GO:0030423	1	3	103	17517	0.00970873786407767	0.000171262202431923	0.0175374822	0.4005098	hsa:10978,CLP1,10978:up	http://amigo.geneontology.org/cgi-bin/amigo/term_details?term=GO:0030423
atrial cardiac muscle cell differentiation	Biological Process	GO:0055011	1	3	103	17517	0.00970873786407767	0.000171262202431923	0.0175374822	0.4005098	hsa:2274,FHL2,2274:up	http://amigo.geneontology.org/cgi-bin/amigo/term_details?term=GO:0055011
methylglyoxal metabolic process	Biological Process	GO:0009438	1	3	103	17517	0.00970873786407767	0.000171262202431923	0.0175374822	0.4005098	hsa:2821,GPI,2821:up	http://amigo.geneontology.org/cgi-bin/amigo/term_details?term=GO:0009438
positive regulation of transcription from RNA polymerase II promoter in response to hypoxia	Biological Process	GO:0061419	1	3	103	17517	0.00970873786407767	0.000171262202431923	0.0175374822	0.4005098	hsa:3091,HIF1A,3091:up	http://amigo.geneontology.org/cgi-bin/amigo/term_details?term=GO:0061419
sensory perception of touch	Biological Process	GO:0050975	1	3	103	17517	0.00970873786407767	0.000171262202431923	0.0175374822	0.4005098	hsa:5864,RAB3A,5864:down	http://amigo.geneontology.org/cgi-bin/amigo/term_details?term=GO:0050975
regulation of growth rate	Biological Process	GO:0040009	1	3	103	17517	0.00970873786407767	0.000171262202431923	0.0175374822	0.4005098	hsa:149428,BNIPL,149428:up	http://amigo.geneontology.org/cgi-bin/amigo/term_details?term=GO:0040009
cellular response to oleic acid	Biological Process	GO:0071400	1	3	103	17517	0.00970873786407767	0.000171262202431923	0.0175374822	0.4005098	hsa:1373,CPS1,1373:up	http://amigo.geneontology.org/cgi-bin/amigo/term_details?term=GO:0071400
positive regulation of chemokine-mediated signaling pathway	Biological Process	GO:0070101	1	3	103	17517	0.00970873786407767	0.000171262202431923	0.0175374822	0.4005098	hsa:3091,HIF1A,3091:up	http://amigo.geneontology.org/cgi-bin/amigo/term_details?term=GO:0070101
neural crest cell migration	Biological Process	GO:0001755	2	36	103	17517	0.0194174757281553	0.00205514642918308	0.0189420319	0.4005098	hsa:90,ACVR1,90:up|hsa:3091,HIF1A,3091:up	http://amigo.geneontology.org/cgi-bin/amigo/term_details?term=GO:0001755
translational termination	Biological Process	GO:0006415	4	173	103	17517	0.0388349514563107	0.00987612034024091	0.0190781726	0.4005098	hsa:6202,RPS8,6202:down|hsa:6143,RPL19,6143:down|hsa:6187,RPS2,6187:down|hsa:6161,RPL32,6161:down	http://amigo.geneontology.org/cgi-bin/amigo/term_details?term=GO:0006415
ameboidal-type cell migration	Biological Process	GO:0001667	5	273	103	17517	0.0485436893203883	0.015584860421305	0.0225516820	0.4005098	hsa:154810,AMOTL1,154810:up|hsa:90,ACVR1,90:up|hsa:3091,HIF1A,3091:up|hsa:23473,CAPN7,23473:up|hsa:199953,TMEM201,199953:down	http://amigo.geneontology.org/cgi-bin/amigo/term_details?term=GO:0001667
heterocycle catabolic process	Biological Process	GO:0046700	7	478	103	17517	0.0679611650485437	0.0272877775874864	0.0226826248	0.4005098	hsa:6202,RPS8,6202:down|hsa:6143,RPL19,6143:down|hsa:26019,UPF2,26019:up|hsa:6187,RPS2,6187:down|hsa:339345,NANOS2,339345:up|hsa:6161,RPL32,6161:down|hsa:3091,HIF1A,3091:up	http://amigo.geneontology.org/cgi-bin/amigo/term_details?term=GO:0046700
viral transcription	Biological Process	GO:0019083	4	183	103	17517	0.0388349514563107	0.0104469943483473	0.0229013397	0.4005098	hsa:6202,RPS8,6202:down|hsa:6143,RPL19,6143:down|hsa:6187,RPS2,6187:down|hsa:6161,RPL32,6161:down	http://amigo.geneontology.org/cgi-bin/amigo/term_details?term=GO:0019083
cellular nitrogen compound catabolic process	Biological Process	GO:0044270	7	479	103	17517	0.0679611650485437	0.0273448649882971	0.0229110901	0.4005098	hsa:6202,RPS8,6202:down|hsa:6143,RPL19,6143:down|hsa:26019,UPF2,26019:up|hsa:6187,RPS2,6187:down|hsa:339345,NANOS2,339345:up|hsa:6161,RPL32,6161:down|hsa:3091,HIF1A,3091:up	http://amigo.geneontology.org/cgi-bin/amigo/term_details?term=GO:0044270
connective tissue replacement involved in inflammatory response wound healing	Biological Process	GO:0002248	1	4	103	17517	0.00970873786407767	0.000228349603242564	0.0233153536	0.4005098	hsa:3091,HIF1A,3091:up	http://amigo.geneontology.org/cgi-bin/amigo/term_details?term=GO:0002248
intestinal epithelial cell maturation	Biological Process	GO:0060574	1	4	103	17517	0.00970873786407767	0.000228349603242564	0.0233153536	0.4005098	hsa:3091,HIF1A,3091:up	http://amigo.geneontology.org/cgi-bin/amigo/term_details?term=GO:0060574
atrial septum primum morphogenesis	Biological Process	GO:0003289	1	4	103	17517	0.00970873786407767	0.000228349603242564	0.0233153536	0.4005098	hsa:90,ACVR1,90:up	http://amigo.geneontology.org/cgi-bin/amigo/term_details?term=GO:0003289
generation of L-type calcium current	Biological Process	GO:0061577	1	4	103	17517	0.00970873786407767	0.000228349603242564	0.0233153536	0.4005098	hsa:9722,NOS1AP,9722:up	http://amigo.geneontology.org/cgi-bin/amigo/term_details?term=GO:0061577
B-1 B cell homeostasis	Biological Process	GO:0001922	1	4	103	17517	0.00970873786407767	0.000228349603242564	0.0233153536	0.4005098	hsa:3091,HIF1A,3091:up	http://amigo.geneontology.org/cgi-bin/amigo/term_details?term=GO:0001922
self proteolysis	Biological Process	GO:0097264	1	4	103	17517	0.00970873786407767	0.000228349603242564	0.0233153536	0.4005098	hsa:23473,CAPN7,23473:up	http://amigo.geneontology.org/cgi-bin/amigo/term_details?term=GO:0097264
negative regulation of axon regeneration	Biological Process	GO:0048681	1	4	103	17517	0.00970873786407767	0.000228349603242564	0.0233153536	0.4005098	hsa:2043,EPHA4,2043:up	http://amigo.geneontology.org/cgi-bin/amigo/term_details?term=GO:0048681
apical constriction	Biological Process	GO:0003383	1	4	103	17517	0.00970873786407767	0.000228349603242564	0.0233153536	0.4005098	hsa:56288,PARD3,56288:up	http://amigo.geneontology.org/cgi-bin/amigo/term_details?term=GO:0003383
epithelial cell differentiation involved in mammary gland alveolus development	Biological Process	GO:0061030	1	4	103	17517	0.00970873786407767	0.000228349603242564	0.0233153536	0.4005098	hsa:3091,HIF1A,3091:up	http://amigo.geneontology.org/cgi-bin/amigo/term_details?term=GO:0061030
constitutive secretory pathway	Biological Process	GO:0045054	1	4	103	17517	0.00970873786407767	0.000228349603242564	0.0233153536	0.4005098	hsa:5864,RAB3A,5864:down	http://amigo.geneontology.org/cgi-bin/amigo/term_details?term=GO:0045054
regulation of nitric oxide mediated signal transduction	Biological Process	GO:0010749	1	4	103	17517	0.00970873786407767	0.000228349603242564	0.0233153536	0.4005098	hsa:9722,NOS1AP,9722:up	http://amigo.geneontology.org/cgi-bin/amigo/term_details?term=GO:0010749
elastin metabolic process	Biological Process	GO:0051541	1	4	103	17517	0.00970873786407767	0.000228349603242564	0.0233153536	0.4005098	hsa:3091,HIF1A,3091:up	http://amigo.geneontology.org/cgi-bin/amigo/term_details?term=GO:0051541
snRNA 3'-end processing	Biological Process	GO:0034472	1	4	103	17517	0.00970873786407767	0.000228349603242564	0.0233153536	0.4005098	hsa:79650,USB1,79650:up	http://amigo.geneontology.org/cgi-bin/amigo/term_details?term=GO:0034472
positive regulation of delayed rectifier potassium channel activity	Biological Process	GO:1902261	1	4	103	17517	0.00970873786407767	0.000228349603242564	0.0233153536	0.4005098	hsa:9722,NOS1AP,9722:up	http://amigo.geneontology.org/cgi-bin/amigo/term_details?term=GO:1902261
regulation of determination of dorsal identity	Biological Process	GO:2000015	1	4	103	17517	0.00970873786407767	0.000228349603242564	0.0233153536	0.4005098	hsa:90,ACVR1,90:up	http://amigo.geneontology.org/cgi-bin/amigo/term_details?term=GO:2000015
negative regulation of neuron projection regeneration	Biological Process	GO:0070571	1	4	103	17517	0.00970873786407767	0.000228349603242564	0.0233153536	0.4005098	hsa:2043,EPHA4,2043:up	http://amigo.geneontology.org/cgi-bin/amigo/term_details?term=GO:0070571
regulation of generation of L-type calcium current	Biological Process	GO:1902514	1	4	103	17517	0.00970873786407767	0.000228349603242564	0.0233153536	0.4005098	hsa:9722,NOS1AP,9722:up	http://amigo.geneontology.org/cgi-bin/amigo/term_details?term=GO:1902514
spongiotrophoblast differentiation	Biological Process	GO:0060708	1	4	103	17517	0.00970873786407767	0.000228349603242564	0.0233153536	0.4005098	hsa:2709,GJB5,2709:down	http://amigo.geneontology.org/cgi-bin/amigo/term_details?term=GO:0060708
glutamine catabolic process	Biological Process	GO:0006543	1	4	103	17517	0.00970873786407767	0.000228349603242564	0.0233153536	0.4005098	hsa:1373,CPS1,1373:up	http://amigo.geneontology.org/cgi-bin/amigo/term_details?term=GO:0006543
positive regulation of voltage-gated potassium channel activity	Biological Process	GO:1903818	1	4	103	17517	0.00970873786407767	0.000228349603242564	0.0233153536	0.4005098	hsa:9722,NOS1AP,9722:up	http://amigo.geneontology.org/cgi-bin/amigo/term_details?term=GO:1903818
aromatic compound catabolic process	Biological Process	GO:0019439	7	481	103	17517	0.0679611650485437	0.0274590397899184	0.0233728092	0.4005098	hsa:6202,RPS8,6202:down|hsa:6143,RPL19,6143:down|hsa:26019,UPF2,26019:up|hsa:6187,RPS2,6187:down|hsa:339345,NANOS2,339345:up|hsa:6161,RPL32,6161:down|hsa:3091,HIF1A,3091:up	http://amigo.geneontology.org/cgi-bin/amigo/term_details?term=GO:0019439
regulation of nitric-oxide synthase activity	Biological Process	GO:0050999	2	41	103	17517	0.0194174757281553	0.00234058343323628	0.0241919572	0.4087078	hsa:3091,HIF1A,3091:up|hsa:9722,NOS1AP,9722:up	http://amigo.geneontology.org/cgi-bin/amigo/term_details?term=GO:0050999
cardiac chamber morphogenesis	Biological Process	GO:0003206	3	106	103	17517	0.029126213592233	0.00605126448592796	0.0246229503	0.4130801	hsa:90,ACVR1,90:up|hsa:3091,HIF1A,3091:up|hsa:2274,FHL2,2274:up	http://amigo.geneontology.org/cgi-bin/amigo/term_details?term=GO:0003206
positive regulation of oxidoreductase activity	Biological Process	GO:0051353	2	43	103	17517	0.0194174757281553	0.00245475823485757	0.0264398334	0.4232478	hsa:3091,HIF1A,3091:up|hsa:9722,NOS1AP,9722:up	http://amigo.geneontology.org/cgi-bin/amigo/term_details?term=GO:0051353
viral gene expression	Biological Process	GO:0019080	4	193	103	17517	0.0388349514563107	0.0110178683564537	0.0271606044	0.4232478	hsa:6202,RPS8,6202:down|hsa:6143,RPL19,6143:down|hsa:6187,RPS2,6187:down|hsa:6161,RPL32,6161:down	http://amigo.geneontology.org/cgi-bin/amigo/term_details?term=GO:0019080
small RNA loading onto RISC	Biological Process	GO:0070922	1	5	103	17517	0.00970873786407767	0.000285437004053205	0.0290595732	0.4232478	hsa:10978,CLP1,10978:up	http://amigo.geneontology.org/cgi-bin/amigo/term_details?term=GO:0070922
presynaptic active zone organization	Biological Process	GO:1990709	1	5	103	17517	0.00970873786407767	0.000285437004053205	0.0290595732	0.4232478	hsa:5864,RAB3A,5864:down	http://amigo.geneontology.org/cgi-bin/amigo/term_details?term=GO:1990709
germ-line stem cell maintenance	Biological Process	GO:0030718	1	5	103	17517	0.00970873786407767	0.000285437004053205	0.0290595732	0.4232478	hsa:339345,NANOS2,339345:up	http://amigo.geneontology.org/cgi-bin/amigo/term_details?term=GO:0030718
negative regulation of type I interferon-mediated signaling pathway	Biological Process	GO:0060339	1	5	103	17517	0.00970873786407767	0.000285437004053205	0.0290595732	0.4232478	hsa:58509,CACTIN,58509:up	http://amigo.geneontology.org/cgi-bin/amigo/term_details?term=GO:0060339
septum primum development	Biological Process	GO:0003284	1	5	103	17517	0.00970873786407767	0.000285437004053205	0.0290595732	0.4232478	hsa:90,ACVR1,90:up	http://amigo.geneontology.org/cgi-bin/amigo/term_details?term=GO:0003284
aldehyde biosynthetic process	Biological Process	GO:0046184	1	5	103	17517	0.00970873786407767	0.000285437004053205	0.0290595732	0.4232478	hsa:2821,GPI,2821:up	http://amigo.geneontology.org/cgi-bin/amigo/term_details?term=GO:0046184
axon transport of mitochondrion	Biological Process	GO:0019896	1	5	103	17517	0.00970873786407767	0.000285437004053205	0.0290595732	0.4232478	hsa:3091,HIF1A,3091:up	http://amigo.geneontology.org/cgi-bin/amigo/term_details?term=GO:0019896
regulation of peptidyl-cysteine S-nitrosylation	Biological Process	GO:2000169	1	5	103	17517	0.00970873786407767	0.000285437004053205	0.0290595732	0.4232478	hsa:9722,NOS1AP,9722:up	http://amigo.geneontology.org/cgi-bin/amigo/term_details?term=GO:2000169
negative regulation of oxidative stress-induced neuron intrinsic apoptotic signaling pathway	Biological Process	GO:1903377	1	5	103	17517	0.00970873786407767	0.000285437004053205	0.0290595732	0.4232478	hsa:3091,HIF1A,3091:up	http://amigo.geneontology.org/cgi-bin/amigo/term_details?term=GO:1903377
translational elongation	Biological Process	GO:0006414	4	198	103	17517	0.0388349514563107	0.0113033053605069	0.0294566360	0.4232478	hsa:6202,RPS8,6202:down|hsa:6143,RPL19,6143:down|hsa:6187,RPS2,6187:down|hsa:6161,RPL32,6161:down	http://amigo.geneontology.org/cgi-bin/amigo/term_details?term=GO:0006414
cellular response to hypoxia	Biological Process	GO:0071456	3	114	103	17517	0.029126213592233	0.00650796369241308	0.0296834817	0.4232478	hsa:3091,HIF1A,3091:up|hsa:10397,NDRG1,10397:up|hsa:64344,HIF3A,64344:up	http://amigo.geneontology.org/cgi-bin/amigo/term_details?term=GO:0071456
cellular response to decreased oxygen levels	Biological Process	GO:0036294	3	116	103	17517	0.029126213592233	0.00662213849403437	0.0310280781	0.4232478	hsa:3091,HIF1A,3091:up|hsa:10397,NDRG1,10397:up|hsa:64344,HIF3A,64344:up	http://amigo.geneontology.org/cgi-bin/amigo/term_details?term=GO:0036294
multi-organism metabolic process	Biological Process	GO:0044033	4	202	103	17517	0.0388349514563107	0.0115316549637495	0.0313741482	0.4232478	hsa:6202,RPS8,6202:down|hsa:6143,RPL19,6143:down|hsa:6187,RPS2,6187:down|hsa:6161,RPL32,6161:down	http://amigo.geneontology.org/cgi-bin/amigo/term_details?term=GO:0044033
mitochondrial electron transport, NADH to ubiquinone	Biological Process	GO:0006120	2	48	103	17517	0.0194174757281553	0.00274019523891077	0.0324099256	0.4232478	hsa:4538,ND4,4538:down|hsa:4537,ND3,4537:up	http://amigo.geneontology.org/cgi-bin/amigo/term_details?term=GO:0006120
organic cyclic compound catabolic process	Biological Process	GO:1901361	7	516	103	17517	0.0679611650485437	0.0294570988182908	0.0325247955	0.4232478	hsa:6202,RPS8,6202:down|hsa:6143,RPL19,6143:down|hsa:26019,UPF2,26019:up|hsa:6187,RPS2,6187:down|hsa:339345,NANOS2,339345:up|hsa:6161,RPL32,6161:down|hsa:3091,HIF1A,3091:up	http://amigo.geneontology.org/cgi-bin/amigo/term_details?term=GO:1901361
bicellular tight junction assembly	Biological Process	GO:0070830	2	49	103	17517	0.0194174757281553	0.00279728263972141	0.0336618640	0.4232478	hsa:153562,MARVELD2,153562:down|hsa:56288,PARD3,56288:up	http://amigo.geneontology.org/cgi-bin/amigo/term_details?term=GO:0070830
purine ribonucleoside monophosphate metabolic process	Biological Process	GO:0009167	4	207	103	17517	0.0388349514563107	0.0118170919678027	0.0338724769	0.4232478	hsa:2821,GPI,2821:up|hsa:4538,ND4,4538:down|hsa:3091,HIF1A,3091:up|hsa:4537,ND3,4537:up	http://amigo.geneontology.org/cgi-bin/amigo/term_details?term=GO:0009167
purine nucleoside monophosphate metabolic process	Biological Process	GO:0009126	4	208	103	17517	0.0388349514563107	0.0118741793686133	0.0343857131	0.4232478	hsa:2821,GPI,2821:up|hsa:4538,ND4,4538:down|hsa:3091,HIF1A,3091:up|hsa:4537,ND3,4537:up	http://amigo.geneontology.org/cgi-bin/amigo/term_details?term=GO:0009126
endothelial cell fate commitment	Biological Process	GO:0060839	1	6	103	17517	0.00970873786407767	0.000342524404863847	0.0347703352	0.4232478	hsa:90,ACVR1,90:up	http://amigo.geneontology.org/cgi-bin/amigo/term_details?term=GO:0060839
arginine biosynthetic process	Biological Process	GO:0006526	1	6	103	17517	0.00970873786407767	0.000342524404863847	0.0347703352	0.4232478	hsa:1373,CPS1,1373:up	http://amigo.geneontology.org/cgi-bin/amigo/term_details?term=GO:0006526
corticospinal tract morphogenesis	Biological Process	GO:0021957	1	6	103	17517	0.00970873786407767	0.000342524404863847	0.0347703352	0.4232478	hsa:2043,EPHA4,2043:up	http://amigo.geneontology.org/cgi-bin/amigo/term_details?term=GO:0021957
activation of JNKK activity	Biological Process	GO:0007256	1	6	103	17517	0.00970873786407767	0.000342524404863847	0.0347703352	0.4232478	hsa:4293,MAP3K9,4293:down	http://amigo.geneontology.org/cgi-bin/amigo/term_details?term=GO:0007256
oxygen homeostasis	Biological Process	GO:0032364	1	6	103	17517	0.00970873786407767	0.000342524404863847	0.0347703352	0.4232478	hsa:3091,HIF1A,3091:up	http://amigo.geneontology.org/cgi-bin/amigo/term_details?term=GO:0032364
inflammatory response to wounding	Biological Process	GO:0090594	1	6	103	17517	0.00970873786407767	0.000342524404863847	0.0347703352	0.4232478	hsa:3091,HIF1A,3091:up	http://amigo.geneontology.org/cgi-bin/amigo/term_details?term=GO:0090594
cardiac endothelial cell differentiation	Biological Process	GO:0003348	1	6	103	17517	0.00970873786407767	0.000342524404863847	0.0347703352	0.4232478	hsa:90,ACVR1,90:up	http://amigo.geneontology.org/cgi-bin/amigo/term_details?term=GO:0003348
negative regulation of hippo signaling	Biological Process	GO:0035331	1	6	103	17517	0.00970873786407767	0.000342524404863847	0.0347703352	0.4232478	hsa:55841,WWC3,55841:up	http://amigo.geneontology.org/cgi-bin/amigo/term_details?term=GO:0035331
mitral valve morphogenesis	Biological Process	GO:0003183	1	6	103	17517	0.00970873786407767	0.000342524404863847	0.0347703352	0.4232478	hsa:90,ACVR1,90:up	http://amigo.geneontology.org/cgi-bin/amigo/term_details?term=GO:0003183
response to oleic acid	Biological Process	GO:0034201	1	6	103	17517	0.00970873786407767	0.000342524404863847	0.0347703352	0.4232478	hsa:1373,CPS1,1373:up	http://amigo.geneontology.org/cgi-bin/amigo/term_details?term=GO:0034201
wound healing involved in inflammatory response	Biological Process	GO:0002246	1	6	103	17517	0.00970873786407767	0.000342524404863847	0.0347703352	0.4232478	hsa:3091,HIF1A,3091:up	http://amigo.geneontology.org/cgi-bin/amigo/term_details?term=GO:0002246
endocardial cell differentiation	Biological Process	GO:0060956	1	6	103	17517	0.00970873786407767	0.000342524404863847	0.0347703352	0.4232478	hsa:90,ACVR1,90:up	http://amigo.geneontology.org/cgi-bin/amigo/term_details?term=GO:0060956
cellular modified amino acid biosynthetic process	Biological Process	GO:0042398	2	50	103	17517	0.0194174757281553	0.00285437004053205	0.0349324950	0.4232478	hsa:1373,CPS1,1373:up|hsa:3029,HAGH,3029:down	http://amigo.geneontology.org/cgi-bin/amigo/term_details?term=GO:0042398
cellular response to interleukin-1	Biological Process	GO:0071347	2	50	103	17517	0.0194174757281553	0.00285437004053205	0.0349324950	0.4232478	hsa:3091,HIF1A,3091:up|hsa:58509,CACTIN,58509:up	http://amigo.geneontology.org/cgi-bin/amigo/term_details?term=GO:0071347
cellular response to oxygen levels	Biological Process	GO:0071453	3	125	103	17517	0.029126213592233	0.00713592510133014	0.0374688114	0.4293555	hsa:3091,HIF1A,3091:up|hsa:10397,NDRG1,10397:up|hsa:64344,HIF3A,64344:up	http://amigo.geneontology.org/cgi-bin/amigo/term_details?term=GO:0071453
single-organism carbohydrate catabolic process	Biological Process	GO:0044724	3	126	103	17517	0.029126213592233	0.00719301250214078	0.0382235650	0.4293555	hsa:1373,CPS1,1373:up|hsa:2821,GPI,2821:up|hsa:3091,HIF1A,3091:up	http://amigo.geneontology.org/cgi-bin/amigo/term_details?term=GO:0044724
cardiac chamber development	Biological Process	GO:0003205	3	126	103	17517	0.029126213592233	0.00719301250214078	0.0382235650	0.4293555	hsa:90,ACVR1,90:up|hsa:3091,HIF1A,3091:up|hsa:2274,FHL2,2274:up	http://amigo.geneontology.org/cgi-bin/amigo/term_details?term=GO:0003205
neural crest cell development	Biological Process	GO:0014032	2	53	103	17517	0.0194174757281553	0.00302563224296398	0.0388539702	0.4293555	hsa:90,ACVR1,90:up|hsa:3091,HIF1A,3091:up	http://amigo.geneontology.org/cgi-bin/amigo/term_details?term=GO:0014032
regulation of transcription from RNA polymerase II promoter in response to stress	Biological Process	GO:0043618	2	53	103	17517	0.0194174757281553	0.00302563224296398	0.0388539702	0.4293555	hsa:3091,HIF1A,3091:up|hsa:64344,HIF3A,64344:up	http://amigo.geneontology.org/cgi-bin/amigo/term_details?term=GO:0043618
regulation of monooxygenase activity	Biological Process	GO:0032768	2	53	103	17517	0.0194174757281553	0.00302563224296398	0.0388539702	0.4293555	hsa:3091,HIF1A,3091:up|hsa:9722,NOS1AP,9722:up	http://amigo.geneontology.org/cgi-bin/amigo/term_details?term=GO:0032768
regulation of cell shape	Biological Process	GO:0008360	3	127	103	17517	0.029126213592233	0.00725009990295142	0.0389860822	0.4293555	hsa:55023,PHIP,55023:up|hsa:752,FMNL1,752:down|hsa:30011,SH3KBP1,30011:down	http://amigo.geneontology.org/cgi-bin/amigo/term_details?term=GO:0008360
peripheral nervous system myelin maintenance	Biological Process	GO:0032287	1	7	103	17517	0.00970873786407767	0.000399611805674488	0.0404478325	0.4293555	hsa:10397,NDRG1,10397:up	http://amigo.geneontology.org/cgi-bin/amigo/term_details?term=GO:0032287
antigen processing and presentation of endogenous peptide antigen via MHC class I	Biological Process	GO:0019885	1	7	103	17517	0.00970873786407767	0.000399611805674488	0.0404478325	0.4293555	hsa:6892,TAPBP,6892:up	http://amigo.geneontology.org/cgi-bin/amigo/term_details?term=GO:0019885
neural fold formation	Biological Process	GO:0001842	1	7	103	17517	0.00970873786407767	0.000399611805674488	0.0404478325	0.4293555	hsa:3091,HIF1A,3091:up	http://amigo.geneontology.org/cgi-bin/amigo/term_details?term=GO:0001842
actin filament severing	Biological Process	GO:0051014	1	7	103	17517	0.00970873786407767	0.000399611805674488	0.0404478325	0.4293555	hsa:752,FMNL1,752:down	http://amigo.geneontology.org/cgi-bin/amigo/term_details?term=GO:0051014
negative regulation of interferon-beta production	Biological Process	GO:0032688	1	7	103	17517	0.00970873786407767	0.000399611805674488	0.0404478325	0.4293555	hsa:58509,CACTIN,58509:up	http://amigo.geneontology.org/cgi-bin/amigo/term_details?term=GO:0032688
regulation of oxidative stress-induced neuron intrinsic apoptotic signaling pathway	Biological Process	GO:1903376	1	7	103	17517	0.00970873786407767	0.000399611805674488	0.0404478325	0.4293555	hsa:3091,HIF1A,3091:up	http://amigo.geneontology.org/cgi-bin/amigo/term_details?term=GO:1903376
regulation of heart rate by chemical signal	Biological Process	GO:0003062	1	7	103	17517	0.00970873786407767	0.000399611805674488	0.0404478325	0.4293555	hsa:9722,NOS1AP,9722:up	http://amigo.geneontology.org/cgi-bin/amigo/term_details?term=GO:0003062
columnar/cuboidal epithelial cell maturation	Biological Process	GO:0002069	1	7	103	17517	0.00970873786407767	0.000399611805674488	0.0404478325	0.4293555	hsa:3091,HIF1A,3091:up	http://amigo.geneontology.org/cgi-bin/amigo/term_details?term=GO:0002069
positive regulation of spindle checkpoint	Biological Process	GO:0090232	1	7	103	17517	0.00970873786407767	0.000399611805674488	0.0404478325	0.4293555	hsa:10397,NDRG1,10397:up	http://amigo.geneontology.org/cgi-bin/amigo/term_details?term=GO:0090232
neuron intrinsic apoptotic signaling pathway in response to oxidative stress	Biological Process	GO:0036480	1	7	103	17517	0.00970873786407767	0.000399611805674488	0.0404478325	0.4293555	hsa:3091,HIF1A,3091:up	http://amigo.geneontology.org/cgi-bin/amigo/term_details?term=GO:0036480
myeloid progenitor cell differentiation	Biological Process	GO:0002318	1	7	103	17517	0.00970873786407767	0.000399611805674488	0.0404478325	0.4293555	hsa:4291,MLF1,4291:up	http://amigo.geneontology.org/cgi-bin/amigo/term_details?term=GO:0002318
regulation of high voltage-gated calcium channel activity	Biological Process	GO:1901841	1	7	103	17517	0.00970873786407767	0.000399611805674488	0.0404478325	0.4293555	hsa:9722,NOS1AP,9722:up	http://amigo.geneontology.org/cgi-bin/amigo/term_details?term=GO:1901841
mitral valve development	Biological Process	GO:0003174	1	7	103	17517	0.00970873786407767	0.000399611805674488	0.0404478325	0.4293555	hsa:90,ACVR1,90:up	http://amigo.geneontology.org/cgi-bin/amigo/term_details?term=GO:0003174
negative regulation of thymocyte apoptotic process	Biological Process	GO:0070244	1	7	103	17517	0.00970873786407767	0.000399611805674488	0.0404478325	0.4293555	hsa:3091,HIF1A,3091:up	http://amigo.geneontology.org/cgi-bin/amigo/term_details?term=GO:0070244
lactate metabolic process	Biological Process	GO:0006089	1	7	103	17517	0.00970873786407767	0.000399611805674488	0.0404478325	0.4293555	hsa:3091,HIF1A,3091:up	http://amigo.geneontology.org/cgi-bin/amigo/term_details?term=GO:0006089
negative regulation of oxidative stress-induced neuron death	Biological Process	GO:1903204	1	7	103	17517	0.00970873786407767	0.000399611805674488	0.0404478325	0.4293555	hsa:3091,HIF1A,3091:up	http://amigo.geneontology.org/cgi-bin/amigo/term_details?term=GO:1903204
protein localization to membrane	Biological Process	GO:0072657	6	430	103	17517	0.058252427184466	0.0245475823485757	0.0413528816	0.4363567	hsa:6202,RPS8,6202:down|hsa:6143,RPL19,6143:down|hsa:6187,RPS2,6187:down|hsa:6161,RPL32,6161:down|hsa:56288,PARD3,56288:up|hsa:8548,BLZF1,8548:up	http://amigo.geneontology.org/cgi-bin/amigo/term_details?term=GO:0072657
ribonucleoside monophosphate metabolic process	Biological Process	GO:0009161	4	221	103	17517	0.0388349514563107	0.0126163155791517	0.0414711618	0.4363567	hsa:2821,GPI,2821:up|hsa:4538,ND4,4538:down|hsa:3091,HIF1A,3091:up|hsa:4537,ND3,4537:up	http://amigo.geneontology.org/cgi-bin/amigo/term_details?term=GO:0009161
carbohydrate catabolic process	Biological Process	GO:0016052	3	133	103	17517	0.029126213592233	0.00759262430781527	0.0437231566	0.4405391	hsa:1373,CPS1,1373:up|hsa:2821,GPI,2821:up|hsa:3091,HIF1A,3091:up	http://amigo.geneontology.org/cgi-bin/amigo/term_details?term=GO:0016052
apical junction assembly	Biological Process	GO:0043297	2	57	103	17517	0.0194174757281553	0.00325398184620654	0.0443288857	0.4405391	hsa:153562,MARVELD2,153562:down|hsa:56288,PARD3,56288:up	http://amigo.geneontology.org/cgi-bin/amigo/term_details?term=GO:0043297
regulation of DNA-templated transcription in response to stress	Biological Process	GO:0043620	2	57	103	17517	0.0194174757281553	0.00325398184620654	0.0443288857	0.4405391	hsa:3091,HIF1A,3091:up|hsa:64344,HIF3A,64344:up	http://amigo.geneontology.org/cgi-bin/amigo/term_details?term=GO:0043620
RNA interference	Biological Process	GO:0016246	1	8	103	17517	0.00970873786407767	0.000456699206485129	0.0460922570	0.4405391	hsa:10978,CLP1,10978:up	http://amigo.geneontology.org/cgi-bin/amigo/term_details?term=GO:0016246
positive regulation of myelination	Biological Process	GO:0031643	1	8	103	17517	0.00970873786407767	0.000456699206485129	0.0460922570	0.4405391	hsa:56288,PARD3,56288:up	http://amigo.geneontology.org/cgi-bin/amigo/term_details?term=GO:0031643
synaptic vesicle maturation	Biological Process	GO:0016188	1	8	103	17517	0.00970873786407767	0.000456699206485129	0.0460922570	0.4405391	hsa:5864,RAB3A,5864:down	http://amigo.geneontology.org/cgi-bin/amigo/term_details?term=GO:0016188
regulation of chemokine-mediated signaling pathway	Biological Process	GO:0070099	1	8	103	17517	0.00970873786407767	0.000456699206485129	0.0460922570	0.4405391	hsa:3091,HIF1A,3091:up	http://amigo.geneontology.org/cgi-bin/amigo/term_details?term=GO:0070099
transforming growth factor beta2 production	Biological Process	GO:0032906	1	8	103	17517	0.00970873786407767	0.000456699206485129	0.0460922570	0.4405391	hsa:3091,HIF1A,3091:up	http://amigo.geneontology.org/cgi-bin/amigo/term_details?term=GO:0032906
antigen processing and presentation of endogenous peptide antigen	Biological Process	GO:0002483	1	8	103	17517	0.00970873786407767	0.000456699206485129	0.0460922570	0.4405391	hsa:6892,TAPBP,6892:up	http://amigo.geneontology.org/cgi-bin/amigo/term_details?term=GO:0002483
gas homeostasis	Biological Process	GO:0033483	1	8	103	17517	0.00970873786407767	0.000456699206485129	0.0460922570	0.4405391	hsa:3091,HIF1A,3091:up	http://amigo.geneontology.org/cgi-bin/amigo/term_details?term=GO:0033483
cellular response to exogenous dsRNA	Biological Process	GO:0071360	1	8	103	17517	0.00970873786407767	0.000456699206485129	0.0460922570	0.4405391	hsa:115004,MB21D1,115004:down	http://amigo.geneontology.org/cgi-bin/amigo/term_details?term=GO:0071360
cardiac muscle cell fate commitment	Biological Process	GO:0060923	1	8	103	17517	0.00970873786407767	0.000456699206485129	0.0460922570	0.4405391	hsa:90,ACVR1,90:up	http://amigo.geneontology.org/cgi-bin/amigo/term_details?term=GO:0060923
nuclear migration	Biological Process	GO:0007097	1	8	103	17517	0.00970873786407767	0.000456699206485129	0.0460922570	0.4405391	hsa:199953,TMEM201,199953:down	http://amigo.geneontology.org/cgi-bin/amigo/term_details?term=GO:0007097
regulation of cardiac muscle cell action potential	Biological Process	GO:0098901	1	8	103	17517	0.00970873786407767	0.000456699206485129	0.0460922570	0.4405391	hsa:9722,NOS1AP,9722:up	http://amigo.geneontology.org/cgi-bin/amigo/term_details?term=GO:0098901
regulation of transforming growth factor beta2 production	Biological Process	GO:0032909	1	8	103	17517	0.00970873786407767	0.000456699206485129	0.0460922570	0.4405391	hsa:3091,HIF1A,3091:up	http://amigo.geneontology.org/cgi-bin/amigo/term_details?term=GO:0032909
nucleoside monophosphate metabolic process	Biological Process	GO:0009123	4	232	103	17517	0.0388349514563107	0.0132442769880687	0.0480674171	0.4510451	hsa:2821,GPI,2821:up|hsa:4538,ND4,4538:down|hsa:3091,HIF1A,3091:up|hsa:4537,ND3,4537:up	http://amigo.geneontology.org/cgi-bin/amigo/term_details?term=GO:0009123
Golgi vesicle transport	Biological Process	GO:0048193	4	235	103	17517	0.0388349514563107	0.0134155391905007	0.0499618819	0.4510451	hsa:6892,TAPBP,6892:up|hsa:2495,FTH1,2495:down|hsa:57222,ERGIC1,57222:down|hsa:8548,BLZF1,8548:up	http://amigo.geneontology.org/cgi-bin/amigo/term_details?term=GO:0048193
embryonic heart tube morphogenesis	Biological Process	GO:0003143	2	61	103	17517	0.0194174757281553	0.00348233144944911	0.0500708778	0.4510451	hsa:90,ACVR1,90:up|hsa:3091,HIF1A,3091:up	http://amigo.geneontology.org/cgi-bin/amigo/term_details?term=GO:0003143
ATP synthesis coupled electron transport	Biological Process	GO:0042773	2	61	103	17517	0.0194174757281553	0.00348233144944911	0.0500708778	0.4510451	hsa:4538,ND4,4538:down|hsa:4537,ND3,4537:up	http://amigo.geneontology.org/cgi-bin/amigo/term_details?term=GO:0042773
positive regulation of JUN kinase activity	Biological Process	GO:0043507	2	61	103	17517	0.0194174757281553	0.00348233144944911	0.0500708778	0.4510451	hsa:2043,EPHA4,2043:up|hsa:4293,MAP3K9,4293:down	http://amigo.geneontology.org/cgi-bin/amigo/term_details?term=GO:0043507
neural crest cell differentiation	Biological Process	GO:0014033	2	61	103	17517	0.0194174757281553	0.00348233144944911	0.0500708778	0.4510451	hsa:90,ACVR1,90:up|hsa:3091,HIF1A,3091:up	http://amigo.geneontology.org/cgi-bin/amigo/term_details?term=GO:0014033
mitochondrial ATP synthesis coupled electron transport	Biological Process	GO:0042775	2	61	103	17517	0.0194174757281553	0.00348233144944911	0.0500708778	0.4510451	hsa:4538,ND4,4538:down|hsa:4537,ND3,4537:up	http://amigo.geneontology.org/cgi-bin/amigo/term_details?term=GO:0042775
regulation of epithelial cell migration	Biological Process	GO:0010632	3	142	103	17517	0.029126213592233	0.00810641091511104	0.0513416824	0.4510451	hsa:154810,AMOTL1,154810:up|hsa:3091,HIF1A,3091:up|hsa:23473,CAPN7,23473:up	http://amigo.geneontology.org/cgi-bin/amigo/term_details?term=GO:0010632
determination of dorsal identity	Biological Process	GO:0048263	1	9	103	17517	0.00970873786407767	0.00051378660729577	0.0517037995	0.4510451	hsa:90,ACVR1,90:up	http://amigo.geneontology.org/cgi-bin/amigo/term_details?term=GO:0048263
citrulline biosynthetic process	Biological Process	GO:0019240	1	9	103	17517	0.00970873786407767	0.00051378660729577	0.0517037995	0.4510451	hsa:1373,CPS1,1373:up	http://amigo.geneontology.org/cgi-bin/amigo/term_details?term=GO:0019240
regulation of hippo signaling	Biological Process	GO:0035330	1	9	103	17517	0.00970873786407767	0.00051378660729577	0.0517037995	0.4510451	hsa:55841,WWC3,55841:up	http://amigo.geneontology.org/cgi-bin/amigo/term_details?term=GO:0035330
negative regulation of lipopolysaccharide-mediated signaling pathway	Biological Process	GO:0031665	1	9	103	17517	0.00970873786407767	0.00051378660729577	0.0517037995	0.4510451	hsa:58509,CACTIN,58509:up	http://amigo.geneontology.org/cgi-bin/amigo/term_details?term=GO:0031665
positive regulation of hormone biosynthetic process	Biological Process	GO:0046886	1	9	103	17517	0.00970873786407767	0.00051378660729577	0.0517037995	0.4510451	hsa:3091,HIF1A,3091:up	http://amigo.geneontology.org/cgi-bin/amigo/term_details?term=GO:0046886
regulation of delayed rectifier potassium channel activity	Biological Process	GO:1902259	1	9	103	17517	0.00970873786407767	0.00051378660729577	0.0517037995	0.4510451	hsa:9722,NOS1AP,9722:up	http://amigo.geneontology.org/cgi-bin/amigo/term_details?term=GO:1902259
protein nitrosylation	Biological Process	GO:0017014	1	9	103	17517	0.00970873786407767	0.00051378660729577	0.0517037995	0.4510451	hsa:9722,NOS1AP,9722:up	http://amigo.geneontology.org/cgi-bin/amigo/term_details?term=GO:0017014
peptidyl-cysteine S-nitrosylation	Biological Process	GO:0018119	1	9	103	17517	0.00970873786407767	0.00051378660729577	0.0517037995	0.4510451	hsa:9722,NOS1AP,9722:up	http://amigo.geneontology.org/cgi-bin/amigo/term_details?term=GO:0018119
positive regulation of cell cycle checkpoint	Biological Process	GO:1901978	1	9	103	17517	0.00970873786407767	0.00051378660729577	0.0517037995	0.4510451	hsa:10397,NDRG1,10397:up	http://amigo.geneontology.org/cgi-bin/amigo/term_details?term=GO:1901978
neuron death in response to oxidative stress	Biological Process	GO:0036475	1	9	103	17517	0.00970873786407767	0.00051378660729577	0.0517037995	0.4510451	hsa:3091,HIF1A,3091:up	http://amigo.geneontology.org/cgi-bin/amigo/term_details?term=GO:0036475
regulation of oxidative stress-induced neuron death	Biological Process	GO:1903203	1	9	103	17517	0.00970873786407767	0.00051378660729577	0.0517037995	0.4510451	hsa:3091,HIF1A,3091:up	http://amigo.geneontology.org/cgi-bin/amigo/term_details?term=GO:1903203
determination of dorsal/ventral asymmetry	Biological Process	GO:0048262	1	9	103	17517	0.00970873786407767	0.00051378660729577	0.0517037995	0.4510451	hsa:90,ACVR1,90:up	http://amigo.geneontology.org/cgi-bin/amigo/term_details?term=GO:0048262
glycolytic process	Biological Process	GO:0006096	2	63	103	17517	0.0194174757281553	0.00359650625107039	0.0530372666	0.4593372	hsa:2821,GPI,2821:up|hsa:3091,HIF1A,3091:up	http://amigo.geneontology.org/cgi-bin/amigo/term_details?term=GO:0006096
cellular carbohydrate catabolic process	Biological Process	GO:0044275	2	64	103	17517	0.0194174757281553	0.00365359365188103	0.0545434969	0.4689959	hsa:1373,CPS1,1373:up|hsa:3091,HIF1A,3091:up	http://amigo.geneontology.org/cgi-bin/amigo/term_details?term=GO:0044275
regulation of bone mineralization	Biological Process	GO:0030500	2	65	103	17517	0.0194174757281553	0.00371068105269167	0.0560647808	0.4690139	hsa:90,ACVR1,90:up|hsa:3091,HIF1A,3091:up	http://amigo.geneontology.org/cgi-bin/amigo/term_details?term=GO:0030500
regulation of short-term neuronal synaptic plasticity	Biological Process	GO:0048172	1	10	103	17517	0.00970873786407767	0.000570874008106411	0.0572826497	0.4690139	hsa:5864,RAB3A,5864:down	http://amigo.geneontology.org/cgi-bin/amigo/term_details?term=GO:0048172
negative regulation of mesenchymal cell apoptotic process	Biological Process	GO:2001054	1	10	103	17517	0.00970873786407767	0.000570874008106411	0.0572826497	0.4690139	hsa:3091,HIF1A,3091:up	http://amigo.geneontology.org/cgi-bin/amigo/term_details?term=GO:2001054
regulation of axon regeneration	Biological Process	GO:0048679	1	10	103	17517	0.00970873786407767	0.000570874008106411	0.0572826497	0.4690139	hsa:2043,EPHA4,2043:up	http://amigo.geneontology.org/cgi-bin/amigo/term_details?term=GO:0048679
negative regulation of activin receptor signaling pathway	Biological Process	GO:0032926	1	10	103	17517	0.00970873786407767	0.000570874008106411	0.0572826497	0.4690139	hsa:90,ACVR1,90:up	http://amigo.geneontology.org/cgi-bin/amigo/term_details?term=GO:0032926
tRNA splicing, via endonucleolytic cleavage and ligation	Biological Process	GO:0006388	1	10	103	17517	0.00970873786407767	0.000570874008106411	0.0572826497	0.4690139	hsa:10978,CLP1,10978:up	http://amigo.geneontology.org/cgi-bin/amigo/term_details?term=GO:0006388
antigen processing and presentation of endogenous antigen	Biological Process	GO:0019883	1	10	103	17517	0.00970873786407767	0.000570874008106411	0.0572826497	0.4690139	hsa:6892,TAPBP,6892:up	http://amigo.geneontology.org/cgi-bin/amigo/term_details?term=GO:0019883
hemoglobin biosynthetic process	Biological Process	GO:0042541	1	10	103	17517	0.00970873786407767	0.000570874008106411	0.0572826497	0.4690139	hsa:3091,HIF1A,3091:up	http://amigo.geneontology.org/cgi-bin/amigo/term_details?term=GO:0042541
aldehyde catabolic process	Biological Process	GO:0046185	1	10	103	17517	0.00970873786407767	0.000570874008106411	0.0572826497	0.4690139	hsa:2821,GPI,2821:up	http://amigo.geneontology.org/cgi-bin/amigo/term_details?term=GO:0046185
homocysteine metabolic process	Biological Process	GO:0050667	1	10	103	17517	0.00970873786407767	0.000570874008106411	0.0572826497	0.4690139	hsa:1373,CPS1,1373:up	http://amigo.geneontology.org/cgi-bin/amigo/term_details?term=GO:0050667
positive regulation of action potential	Biological Process	GO:0045760	1	10	103	17517	0.00970873786407767	0.000570874008106411	0.0572826497	0.4690139	hsa:9722,NOS1AP,9722:up	http://amigo.geneontology.org/cgi-bin/amigo/term_details?term=GO:0045760
regulation of transcription from RNA polymerase II promoter in response to oxidative stress	Biological Process	GO:0043619	1	10	103	17517	0.00970873786407767	0.000570874008106411	0.0572826497	0.4690139	hsa:3091,HIF1A,3091:up	http://amigo.geneontology.org/cgi-bin/amigo/term_details?term=GO:0043619
cellular iron ion homeostasis	Biological Process	GO:0006879	2	67	103	17517	0.0194174757281553	0.00382485585431295	0.0591516106	0.4826691	hsa:2495,FTH1,2495:down|hsa:3091,HIF1A,3091:up	http://amigo.geneontology.org/cgi-bin/amigo/term_details?term=GO:0006879
translational initiation	Biological Process	GO:0006413	4	253	103	17517	0.0388349514563107	0.0144431124050922	0.0621816621	0.4925711	hsa:6202,RPS8,6202:down|hsa:6143,RPL19,6143:down|hsa:6187,RPS2,6187:down|hsa:6161,RPL32,6161:down	http://amigo.geneontology.org/cgi-bin/amigo/term_details?term=GO:0006413
ncRNA processing	Biological Process	GO:0034470	4	253	103	17517	0.0388349514563107	0.0144431124050922	0.0621816621	0.4925711	hsa:6202,RPS8,6202:down|hsa:152992,TRMT44,152992:up|hsa:79650,USB1,79650:up|hsa:10978,CLP1,10978:up	http://amigo.geneontology.org/cgi-bin/amigo/term_details?term=GO:0034470
negative regulation of meiotic nuclear division	Biological Process	GO:0045835	1	11	103	17517	0.00970873786407767	0.000627961408917052	0.0628289961	0.4925711	hsa:339345,NANOS2,339345:up	http://amigo.geneontology.org/cgi-bin/amigo/term_details?term=GO:0045835
ncRNA 3'-end processing	Biological Process	GO:0043628	1	11	103	17517	0.00970873786407767	0.000627961408917052	0.0628289961	0.4925711	hsa:79650,USB1,79650:up	http://amigo.geneontology.org/cgi-bin/amigo/term_details?term=GO:0043628
membrane repolarization during action potential	Biological Process	GO:0086011	1	11	103	17517	0.00970873786407767	0.000627961408917052	0.0628289961	0.4925711	hsa:9722,NOS1AP,9722:up	http://amigo.geneontology.org/cgi-bin/amigo/term_details?term=GO:0086011
regulation of neuron projection regeneration	Biological Process	GO:0070570	1	11	103	17517	0.00970873786407767	0.000627961408917052	0.0628289961	0.4925711	hsa:2043,EPHA4,2043:up	http://amigo.geneontology.org/cgi-bin/amigo/term_details?term=GO:0070570
endocardium development	Biological Process	GO:0003157	1	11	103	17517	0.00970873786407767	0.000627961408917052	0.0628289961	0.4925711	hsa:90,ACVR1,90:up	http://amigo.geneontology.org/cgi-bin/amigo/term_details?term=GO:0003157
RNA splicing, via endonucleolytic cleavage and ligation	Biological Process	GO:0000394	1	11	103	17517	0.00970873786407767	0.000627961408917052	0.0628289961	0.4925711	hsa:10978,CLP1,10978:up	http://amigo.geneontology.org/cgi-bin/amigo/term_details?term=GO:0000394
response to muscle activity	Biological Process	GO:0014850	1	11	103	17517	0.00970873786407767	0.000627961408917052	0.0628289961	0.4925711	hsa:3091,HIF1A,3091:up	http://amigo.geneontology.org/cgi-bin/amigo/term_details?term=GO:0014850
hepatocyte differentiation	Biological Process	GO:0070365	1	11	103	17517	0.00970873786407767	0.000627961408917052	0.0628289961	0.4925711	hsa:1373,CPS1,1373:up	http://amigo.geneontology.org/cgi-bin/amigo/term_details?term=GO:0070365
sensory perception of mechanical stimulus	Biological Process	GO:0050954	3	155	103	17517	0.029126213592233	0.00884854712564937	0.0633992839	0.4954231	hsa:153562,MARVELD2,153562:down|hsa:54084,TSPEAR,54084:up|hsa:5864,RAB3A,5864:down	http://amigo.geneontology.org/cgi-bin/amigo/term_details?term=GO:0050954
glial cell development	Biological Process	GO:0021782	2	71	103	17517	0.0194174757281553	0.00405320545755552	0.0654961433	0.4983432	hsa:10397,NDRG1,10397:up|hsa:56288,PARD3,56288:up	http://amigo.geneontology.org/cgi-bin/amigo/term_details?term=GO:0021782
regulation of biomineral tissue development	Biological Process	GO:0070167	2	72	103	17517	0.0194174757281553	0.00411029285836616	0.0671166124	0.4983432	hsa:90,ACVR1,90:up|hsa:3091,HIF1A,3091:up	http://amigo.geneontology.org/cgi-bin/amigo/term_details?term=GO:0070167
viral life cycle	Biological Process	GO:0019058	5	370	103	17517	0.0485436893203883	0.0211223382999372	0.0672470273	0.4983432	hsa:6202,RPS8,6202:down|hsa:6143,RPL19,6143:down|hsa:6187,RPS2,6187:down|hsa:6161,RPL32,6161:down|hsa:5886,RAD23A,5886:down	http://amigo.geneontology.org/cgi-bin/amigo/term_details?term=GO:0019058
regulation of cell death	Biological Process	GO:0010941	13	1403	103	17517	0.12621359223301	0.0800936233373294	0.0675648201	0.4983432	hsa:55023,PHIP,55023:up|hsa:90,ACVR1,90:up|hsa:3091,HIF1A,3091:up|hsa:23263,MCF2L,23263:down|hsa:2274,FHL2,2274:up|hsa:4293,MAP3K9,4293:down|hsa:79073,TMEM109,79073:down|hsa:10553,HTATIP2,10553:down|hsa:2821,GPI,2821:up|hsa:23567,ZNF346,23567:up|hsa:9722,NOS1AP,9722:up|hsa:64857,PLEKHG2,64857:down|hsa:653619,PRAMEF15,653619:up	http://amigo.geneontology.org/cgi-bin/amigo/term_details?term=GO:0010941
positive regulation of potassium ion transmembrane transporter activity	Biological Process	GO:1901018	1	12	103	17517	0.00970873786407767	0.000685048809727693	0.0683430264	0.4983432	hsa:9722,NOS1AP,9722:up	http://amigo.geneontology.org/cgi-bin/amigo/term_details?term=GO:1901018
myelin maintenance	Biological Process	GO:0043217	1	12	103	17517	0.00970873786407767	0.000685048809727693	0.0683430264	0.4983432	hsa:10397,NDRG1,10397:up	http://amigo.geneontology.org/cgi-bin/amigo/term_details?term=GO:0043217
urea cycle	Biological Process	GO:0000050	1	12	103	17517	0.00970873786407767	0.000685048809727693	0.0683430264	0.4983432	hsa:1373,CPS1,1373:up	http://amigo.geneontology.org/cgi-bin/amigo/term_details?term=GO:0000050
midgut development	Biological Process	GO:0007494	1	12	103	17517	0.00970873786407767	0.000685048809727693	0.0683430264	0.4983432	hsa:1373,CPS1,1373:up	http://amigo.geneontology.org/cgi-bin/amigo/term_details?term=GO:0007494
positive regulation of receptor biosynthetic process	Biological Process	GO:0010870	1	12	103	17517	0.00970873786407767	0.000685048809727693	0.0683430264	0.4983432	hsa:3091,HIF1A,3091:up	http://amigo.geneontology.org/cgi-bin/amigo/term_details?term=GO:0010870
establishment of nucleus localization	Biological Process	GO:0040023	1	12	103	17517	0.00970873786407767	0.000685048809727693	0.0683430264	0.4983432	hsa:199953,TMEM201,199953:down	http://amigo.geneontology.org/cgi-bin/amigo/term_details?term=GO:0040023
positive regulation of hormone metabolic process	Biological Process	GO:0032352	1	12	103	17517	0.00970873786407767	0.000685048809727693	0.0683430264	0.4983432	hsa:3091,HIF1A,3091:up	http://amigo.geneontology.org/cgi-bin/amigo/term_details?term=GO:0032352
negative regulation of MAP kinase activity	Biological Process	GO:0043407	2	73	103	17517	0.0194174757281553	0.0041673802591768	0.0687503909	0.4997945	hsa:5999,RGS4,5999:down|hsa:1850,DUSP8,1850:up	http://amigo.geneontology.org/cgi-bin/amigo/term_details?term=GO:0043407
peripheral nervous system development	Biological Process	GO:0007422	2	74	103	17517	0.0194174757281553	0.00422446765998744	0.0703972699	0.5031420	hsa:10397,NDRG1,10397:up|hsa:56288,PARD3,56288:up	http://amigo.geneontology.org/cgi-bin/amigo/term_details?term=GO:0007422
nitric oxide metabolic process	Biological Process	GO:0046209	2	74	103	17517	0.0194174757281553	0.00422446765998744	0.0703972699	0.5031420	hsa:1373,CPS1,1373:up|hsa:9722,NOS1AP,9722:up	http://amigo.geneontology.org/cgi-bin/amigo/term_details?term=GO:0046209
response to interleukin-1	Biological Process	GO:0070555	2	75	103	17517	0.0194174757281553	0.00428155506079808	0.0720570423	0.5031420	hsa:3091,HIF1A,3091:up|hsa:58509,CACTIN,58509:up	http://amigo.geneontology.org/cgi-bin/amigo/term_details?term=GO:0070555
embryonic heart tube development	Biological Process	GO:0035050	2	75	103	17517	0.0194174757281553	0.00428155506079808	0.0720570423	0.5031420	hsa:90,ACVR1,90:up|hsa:3091,HIF1A,3091:up	http://amigo.geneontology.org/cgi-bin/amigo/term_details?term=GO:0035050
glial cell differentiation	Biological Process	GO:0010001	3	164	103	17517	0.029126213592233	0.00936233373294514	0.0724459799	0.5031420	hsa:10397,NDRG1,10397:up|hsa:56288,PARD3,56288:up|hsa:2043,EPHA4,2043:up	http://amigo.geneontology.org/cgi-bin/amigo/term_details?term=GO:0010001
regulation of JUN kinase activity	Biological Process	GO:0043506	2	76	103	17517	0.0194174757281553	0.00433864246160872	0.0737295031	0.5031420	hsa:2043,EPHA4,2043:up|hsa:4293,MAP3K9,4293:down	http://amigo.geneontology.org/cgi-bin/amigo/term_details?term=GO:0043506
citrulline metabolic process	Biological Process	GO:0000052	1	13	103	17517	0.00970873786407767	0.000742136210538334	0.0738249269	0.5031420	hsa:1373,CPS1,1373:up	http://amigo.geneontology.org/cgi-bin/amigo/term_details?term=GO:0000052
ventricular cardiac muscle cell development	Biological Process	GO:0055015	1	13	103	17517	0.00970873786407767	0.000742136210538334	0.0738249269	0.5031420	hsa:2274,FHL2,2274:up	http://amigo.geneontology.org/cgi-bin/amigo/term_details?term=GO:0055015
positive regulation of insulin-like growth factor receptor signaling pathway	Biological Process	GO:0043568	1	13	103	17517	0.00970873786407767	0.000742136210538334	0.0738249269	0.5031420	hsa:55023,PHIP,55023:up	http://amigo.geneontology.org/cgi-bin/amigo/term_details?term=GO:0043568
cardiac cell fate commitment	Biological Process	GO:0060911	1	13	103	17517	0.00970873786407767	0.000742136210538334	0.0738249269	0.5031420	hsa:90,ACVR1,90:up	http://amigo.geneontology.org/cgi-bin/amigo/term_details?term=GO:0060911
positive regulation of cofactor metabolic process	Biological Process	GO:0051194	1	13	103	17517	0.00970873786407767	0.000742136210538334	0.0738249269	0.5031420	hsa:3091,HIF1A,3091:up	http://amigo.geneontology.org/cgi-bin/amigo/term_details?term=GO:0051194
negative regulation of peptidyl-threonine phosphorylation	Biological Process	GO:0010801	1	13	103	17517	0.00970873786407767	0.000742136210538334	0.0738249269	0.5031420	hsa:56288,PARD3,56288:up	http://amigo.geneontology.org/cgi-bin/amigo/term_details?term=GO:0010801
establishment of epithelial cell polarity	Biological Process	GO:0090162	1	13	103	17517	0.00970873786407767	0.000742136210538334	0.0738249269	0.5031420	hsa:56288,PARD3,56288:up	http://amigo.geneontology.org/cgi-bin/amigo/term_details?term=GO:0090162
mRNA transcription from RNA polymerase II promoter	Biological Process	GO:0042789	1	13	103	17517	0.00970873786407767	0.000742136210538334	0.0738249269	0.5031420	hsa:3091,HIF1A,3091:up	http://amigo.geneontology.org/cgi-bin/amigo/term_details?term=GO:0042789
mesenchymal cell apoptotic process	Biological Process	GO:0097152	1	13	103	17517	0.00970873786407767	0.000742136210538334	0.0738249269	0.5031420	hsa:3091,HIF1A,3091:up	http://amigo.geneontology.org/cgi-bin/amigo/term_details?term=GO:0097152
positive regulation of neurological system process	Biological Process	GO:0031646	1	13	103	17517	0.00970873786407767	0.000742136210538334	0.0738249269	0.5031420	hsa:56288,PARD3,56288:up	http://amigo.geneontology.org/cgi-bin/amigo/term_details?term=GO:0031646
positive regulation of glycolytic process	Biological Process	GO:0045821	1	13	103	17517	0.00970873786407767	0.000742136210538334	0.0738249269	0.5031420	hsa:3091,HIF1A,3091:up	http://amigo.geneontology.org/cgi-bin/amigo/term_details?term=GO:0045821
regulation of mesenchymal cell apoptotic process	Biological Process	GO:2001053	1	13	103	17517	0.00970873786407767	0.000742136210538334	0.0738249269	0.5031420	hsa:3091,HIF1A,3091:up	http://amigo.geneontology.org/cgi-bin/amigo/term_details?term=GO:2001053
positive regulation of coenzyme metabolic process	Biological Process	GO:0051197	1	13	103	17517	0.00970873786407767	0.000742136210538334	0.0738249269	0.5031420	hsa:3091,HIF1A,3091:up	http://amigo.geneontology.org/cgi-bin/amigo/term_details?term=GO:0051197
intestinal epithelial cell development	Biological Process	GO:0060576	1	13	103	17517	0.00970873786407767	0.000742136210538334	0.0738249269	0.5031420	hsa:3091,HIF1A,3091:up	http://amigo.geneontology.org/cgi-bin/amigo/term_details?term=GO:0060576
cellular protein complex disassembly	Biological Process	GO:0043624	4	270	103	17517	0.0388349514563107	0.0154135982188731	0.0750434978	0.5068364	hsa:6202,RPS8,6202:down|hsa:6143,RPL19,6143:down|hsa:6187,RPS2,6187:down|hsa:6161,RPL32,6161:down	http://amigo.geneontology.org/cgi-bin/amigo/term_details?term=GO:0043624
single-organism membrane organization	Biological Process	GO:0044802	8	752	103	17517	0.0776699029126214	0.0429297254096021	0.0752299775	0.5068364	hsa:6202,RPS8,6202:down|hsa:6187,RPS2,6187:down|hsa:6161,RPL32,6161:down|hsa:10397,NDRG1,10397:up|hsa:5864,RAB3A,5864:down|hsa:6143,RPL19,6143:down|hsa:56288,PARD3,56288:up|hsa:8548,BLZF1,8548:up	http://amigo.geneontology.org/cgi-bin/amigo/term_details?term=GO:0044802
reactive nitrogen species metabolic process	Biological Process	GO:2001057	2	77	103	17517	0.0194174757281553	0.00439572986241936	0.0754144491	0.5068364	hsa:1373,CPS1,1373:up|hsa:9722,NOS1AP,9722:up	http://amigo.geneontology.org/cgi-bin/amigo/term_details?term=GO:2001057
intracellular transport	Biological Process	GO:0046907	14	1573	103	17517	0.135922330097087	0.0897984814751384	0.0766672622	0.5112378	hsa:6202,RPS8,6202:down|hsa:6892,TAPBP,6892:up|hsa:6187,RPS2,6187:down|hsa:57222,ERGIC1,57222:down|hsa:55023,PHIP,55023:up|hsa:6161,RPL32,6161:down|hsa:3091,HIF1A,3091:up|hsa:5864,RAB3A,5864:down|hsa:10553,HTATIP2,10553:down|hsa:6143,RPL19,6143:down|hsa:26019,UPF2,26019:up|hsa:2495,FTH1,2495:down|hsa:56288,PARD3,56288:up|hsa:8548,BLZF1,8548:up	http://amigo.geneontology.org/cgi-bin/amigo/term_details?term=GO:0046907
endothelial cell differentiation	Biological Process	GO:0045446	2	78	103	17517	0.0194174757281553	0.00445281726323001	0.0771116791	0.5112378	hsa:90,ACVR1,90:up|hsa:153562,MARVELD2,153562:down	http://amigo.geneontology.org/cgi-bin/amigo/term_details?term=GO:0045446
oxidative phosphorylation	Biological Process	GO:0006119	2	78	103	17517	0.0194174757281553	0.00445281726323001	0.0771116791	0.5112378	hsa:4538,ND4,4538:down|hsa:4537,ND3,4537:up	http://amigo.geneontology.org/cgi-bin/amigo/term_details?term=GO:0006119
negative regulation of interleukin-8 production	Biological Process	GO:0032717	1	14	103	17517	0.00970873786407767	0.000799223611348975	0.0792748830	0.5112378	hsa:58509,CACTIN,58509:up	http://amigo.geneontology.org/cgi-bin/amigo/term_details?term=GO:0032717
atrioventricular valve morphogenesis	Biological Process	GO:0003181	1	14	103	17517	0.00970873786407767	0.000799223611348975	0.0792748830	0.5112378	hsa:90,ACVR1,90:up	http://amigo.geneontology.org/cgi-bin/amigo/term_details?term=GO:0003181
atrial septum morphogenesis	Biological Process	GO:0060413	1	14	103	17517	0.00970873786407767	0.000799223611348975	0.0792748830	0.5112378	hsa:90,ACVR1,90:up	http://amigo.geneontology.org/cgi-bin/amigo/term_details?term=GO:0060413
urea metabolic process	Biological Process	GO:0019627	1	14	103	17517	0.00970873786407767	0.000799223611348975	0.0792748830	0.5112378	hsa:1373,CPS1,1373:up	http://amigo.geneontology.org/cgi-bin/amigo/term_details?term=GO:0019627
regulation of thymocyte apoptotic process	Biological Process	GO:0070243	1	14	103	17517	0.00970873786407767	0.000799223611348975	0.0792748830	0.5112378	hsa:3091,HIF1A,3091:up	http://amigo.geneontology.org/cgi-bin/amigo/term_details?term=GO:0070243
dopaminergic neuron differentiation	Biological Process	GO:0071542	1	14	103	17517	0.00970873786407767	0.000799223611348975	0.0792748830	0.5112378	hsa:3091,HIF1A,3091:up	http://amigo.geneontology.org/cgi-bin/amigo/term_details?term=GO:0071542
spongiotrophoblast layer development	Biological Process	GO:0060712	1	14	103	17517	0.00970873786407767	0.000799223611348975	0.0792748830	0.5112378	hsa:2709,GJB5,2709:down	http://amigo.geneontology.org/cgi-bin/amigo/term_details?term=GO:0060712
glutathione biosynthetic process	Biological Process	GO:0006750	1	14	103	17517	0.00970873786407767	0.000799223611348975	0.0792748830	0.5112378	hsa:3029,HAGH,3029:down	http://amigo.geneontology.org/cgi-bin/amigo/term_details?term=GO:0006750
purine ribonucleoside metabolic process	Biological Process	GO:0046128	4	277	103	17517	0.0388349514563107	0.0158132100245476	0.0807031511	0.5117851	hsa:2821,GPI,2821:up|hsa:4538,ND4,4538:down|hsa:3091,HIF1A,3091:up|hsa:4537,ND3,4537:up	http://amigo.geneontology.org/cgi-bin/amigo/term_details?term=GO:0046128
regulation of oxidoreductase activity	Biological Process	GO:0051341	2	81	103	17517	0.0194174757281553	0.00462407946566193	0.0822750884	0.5117851	hsa:3091,HIF1A,3091:up|hsa:9722,NOS1AP,9722:up	http://amigo.geneontology.org/cgi-bin/amigo/term_details?term=GO:0051341
membrane organization	Biological Process	GO:0061024	9	899	103	17517	0.087378640776699	0.0513215733287663	0.0822925302	0.5117851	hsa:6202,RPS8,6202:down|hsa:6187,RPS2,6187:down|hsa:6161,RPL32,6161:down|hsa:10397,NDRG1,10397:up|hsa:5864,RAB3A,5864:down|hsa:6143,RPL19,6143:down|hsa:2495,FTH1,2495:down|hsa:56288,PARD3,56288:up|hsa:8548,BLZF1,8548:up	http://amigo.geneontology.org/cgi-bin/amigo/term_details?term=GO:0061024
regulation of MAP kinase activity	Biological Process	GO:0043405	4	279	103	17517	0.0388349514563107	0.0159273848261689	0.0823583765	0.5117851	hsa:5999,RGS4,5999:down|hsa:1850,DUSP8,1850:up|hsa:2043,EPHA4,2043:up|hsa:4293,MAP3K9,4293:down	http://amigo.geneontology.org/cgi-bin/amigo/term_details?term=GO:0043405
purine nucleoside metabolic process	Biological Process	GO:0042278	4	280	103	17517	0.0388349514563107	0.0159844722269795	0.0831922974	0.5117851	hsa:2821,GPI,2821:up|hsa:4538,ND4,4538:down|hsa:3091,HIF1A,3091:up|hsa:4537,ND3,4537:up	http://amigo.geneontology.org/cgi-bin/amigo/term_details?term=GO:0042278
asymmetric cell division	Biological Process	GO:0008356	1	15	103	17517	0.00970873786407767	0.000856311012159616	0.0846930791	0.5117851	hsa:56288,PARD3,56288:up	http://amigo.geneontology.org/cgi-bin/amigo/term_details?term=GO:0008356
positive regulation of nucleotide catabolic process	Biological Process	GO:0030813	1	15	103	17517	0.00970873786407767	0.000856311012159616	0.0846930791	0.5117851	hsa:3091,HIF1A,3091:up	http://amigo.geneontology.org/cgi-bin/amigo/term_details?term=GO:0030813
regulation of nuclear-transcribed mRNA catabolic process, deadenylation-dependent decay	Biological Process	GO:1900151	1	15	103	17517	0.00970873786407767	0.000856311012159616	0.0846930791	0.5117851	hsa:339345,NANOS2,339345:up	http://amigo.geneontology.org/cgi-bin/amigo/term_details?term=GO:1900151
regulation of ventricular cardiac muscle cell membrane repolarization	Biological Process	GO:0060307	1	15	103	17517	0.00970873786407767	0.000856311012159616	0.0846930791	0.5117851	hsa:9722,NOS1AP,9722:up	http://amigo.geneontology.org/cgi-bin/amigo/term_details?term=GO:0060307
nonribosomal peptide biosynthetic process	Biological Process	GO:0019184	1	15	103	17517	0.00970873786407767	0.000856311012159616	0.0846930791	0.5117851	hsa:3029,HAGH,3029:down	http://amigo.geneontology.org/cgi-bin/amigo/term_details?term=GO:0019184
nitrogen cycle metabolic process	Biological Process	GO:0071941	1	15	103	17517	0.00970873786407767	0.000856311012159616	0.0846930791	0.5117851	hsa:1373,CPS1,1373:up	http://amigo.geneontology.org/cgi-bin/amigo/term_details?term=GO:0071941
synaptic vesicle fusion to presynaptic membrane	Biological Process	GO:0031629	1	15	103	17517	0.00970873786407767	0.000856311012159616	0.0846930791	0.5117851	hsa:5864,RAB3A,5864:down	http://amigo.geneontology.org/cgi-bin/amigo/term_details?term=GO:0031629
cellular response to gamma radiation	Biological Process	GO:0071480	1	15	103	17517	0.00970873786407767	0.000856311012159616	0.0846930791	0.5117851	hsa:79073,TMEM109,79073:down	http://amigo.geneontology.org/cgi-bin/amigo/term_details?term=GO:0071480
positive regulation of nuclear-transcribed mRNA catabolic process, deadenylation-dependent decay	Biological Process	GO:1900153	1	15	103	17517	0.00970873786407767	0.000856311012159616	0.0846930791	0.5117851	hsa:339345,NANOS2,339345:up	http://amigo.geneontology.org/cgi-bin/amigo/term_details?term=GO:1900153
heart trabecula formation	Biological Process	GO:0060347	1	15	103	17517	0.00970873786407767	0.000856311012159616	0.0846930791	0.5117851	hsa:2274,FHL2,2274:up	http://amigo.geneontology.org/cgi-bin/amigo/term_details?term=GO:0060347
apoptotic process	Biological Process	GO:0006915	15	1746	103	17517	0.145631067961165	0.0996746018153793	0.0861711747	0.5181069	hsa:55023,PHIP,55023:up|hsa:90,ACVR1,90:up|hsa:3091,HIF1A,3091:up|hsa:23263,MCF2L,23263:down|hsa:2274,FHL2,2274:up|hsa:4293,MAP3K9,4293:down|hsa:79073,TMEM109,79073:down|hsa:10553,HTATIP2,10553:down|hsa:2821,GPI,2821:up|hsa:23567,ZNF346,23567:up|hsa:30011,SH3KBP1,30011:down|hsa:9722,NOS1AP,9722:up|hsa:64857,PLEKHG2,64857:down|hsa:653619,PRAMEF15,653619:up|hsa:149428,BNIPL,149428:up	http://amigo.geneontology.org/cgi-bin/amigo/term_details?term=GO:0006915
regulation of apoptotic process	Biological Process	GO:0042981	12	1327	103	17517	0.116504854368932	0.0757549808757207	0.0891631792	0.5219836	hsa:55023,PHIP,55023:up|hsa:90,ACVR1,90:up|hsa:3091,HIF1A,3091:up|hsa:23263,MCF2L,23263:down|hsa:2274,FHL2,2274:up|hsa:4293,MAP3K9,4293:down|hsa:10553,HTATIP2,10553:down|hsa:2821,GPI,2821:up|hsa:23567,ZNF346,23567:up|hsa:9722,NOS1AP,9722:up|hsa:64857,PLEKHG2,64857:down|hsa:653619,PRAMEF15,653619:up	http://amigo.geneontology.org/cgi-bin/amigo/term_details?term=GO:0042981
mammary gland epithelial cell differentiation	Biological Process	GO:0060644	1	16	103	17517	0.00970873786407767	0.000913398412970257	0.0900796986	0.5219836	hsa:3091,HIF1A,3091:up	http://amigo.geneontology.org/cgi-bin/amigo/term_details?term=GO:0060644
centrosome localization	Biological Process	GO:0051642	1	16	103	17517	0.00970873786407767	0.000913398412970257	0.0900796986	0.5219836	hsa:56288,PARD3,56288:up	http://amigo.geneontology.org/cgi-bin/amigo/term_details?term=GO:0051642
regulation of spindle checkpoint	Biological Process	GO:0090231	1	16	103	17517	0.00970873786407767	0.000913398412970257	0.0900796986	0.5219836	hsa:10397,NDRG1,10397:up	http://amigo.geneontology.org/cgi-bin/amigo/term_details?term=GO:0090231
snRNA processing	Biological Process	GO:0016180	1	16	103	17517	0.00970873786407767	0.000913398412970257	0.0900796986	0.5219836	hsa:79650,USB1,79650:up	http://amigo.geneontology.org/cgi-bin/amigo/term_details?term=GO:0016180
negative regulation of bone mineralization	Biological Process	GO:0030502	1	16	103	17517	0.00970873786407767	0.000913398412970257	0.0900796986	0.5219836	hsa:3091,HIF1A,3091:up	http://amigo.geneontology.org/cgi-bin/amigo/term_details?term=GO:0030502
hemoglobin metabolic process	Biological Process	GO:0020027	1	16	103	17517	0.00970873786407767	0.000913398412970257	0.0900796986	0.5219836	hsa:3091,HIF1A,3091:up	http://amigo.geneontology.org/cgi-bin/amigo/term_details?term=GO:0020027
positive regulation of vascular endothelial growth factor receptor signaling pathway	Biological Process	GO:0030949	1	16	103	17517	0.00970873786407767	0.000913398412970257	0.0900796986	0.5219836	hsa:3091,HIF1A,3091:up	http://amigo.geneontology.org/cgi-bin/amigo/term_details?term=GO:0030949
behavioral response to pain	Biological Process	GO:0048266	1	16	103	17517	0.00970873786407767	0.000913398412970257	0.0900796986	0.5219836	hsa:64856,VWA1,64856:up	http://amigo.geneontology.org/cgi-bin/amigo/term_details?term=GO:0048266
establishment of cell polarity	Biological Process	GO:0030010	2	86	103	17517	0.0194174757281553	0.00490951646971513	0.0911082081	0.5239093	hsa:154810,AMOTL1,154810:up|hsa:56288,PARD3,56288:up	http://amigo.geneontology.org/cgi-bin/amigo/term_details?term=GO:0030010
cytoplasmic transport	Biological Process	GO:0016482	9	919	103	17517	0.087378640776699	0.0524633213449792	0.0913351297	0.5239093	hsa:6202,RPS8,6202:down|hsa:6187,RPS2,6187:down|hsa:57222,ERGIC1,57222:down|hsa:55023,PHIP,55023:up|hsa:6161,RPL32,6161:down|hsa:10553,HTATIP2,10553:down|hsa:6143,RPL19,6143:down|hsa:26019,UPF2,26019:up|hsa:8548,BLZF1,8548:up	http://amigo.geneontology.org/cgi-bin/amigo/term_details?term=GO:0016482
programmed cell death	Biological Process	GO:0012501	15	1764	103	17517	0.145631067961165	0.100702175029971	0.0921270036	0.5239093	hsa:55023,PHIP,55023:up|hsa:90,ACVR1,90:up|hsa:3091,HIF1A,3091:up|hsa:23263,MCF2L,23263:down|hsa:2274,FHL2,2274:up|hsa:4293,MAP3K9,4293:down|hsa:79073,TMEM109,79073:down|hsa:10553,HTATIP2,10553:down|hsa:2821,GPI,2821:up|hsa:23567,ZNF346,23567:up|hsa:30011,SH3KBP1,30011:down|hsa:9722,NOS1AP,9722:up|hsa:64857,PLEKHG2,64857:down|hsa:653619,PRAMEF15,653619:up|hsa:149428,BNIPL,149428:up	http://amigo.geneontology.org/cgi-bin/amigo/term_details?term=GO:0012501
regulation of programmed cell death	Biological Process	GO:0043067	12	1336	103	17517	0.116504854368932	0.0762687674830165	0.0926237334	0.5239093	hsa:55023,PHIP,55023:up|hsa:90,ACVR1,90:up|hsa:3091,HIF1A,3091:up|hsa:23263,MCF2L,23263:down|hsa:2274,FHL2,2274:up|hsa:4293,MAP3K9,4293:down|hsa:10553,HTATIP2,10553:down|hsa:2821,GPI,2821:up|hsa:23567,ZNF346,23567:up|hsa:9722,NOS1AP,9722:up|hsa:64857,PLEKHG2,64857:down|hsa:653619,PRAMEF15,653619:up	http://amigo.geneontology.org/cgi-bin/amigo/term_details?term=GO:0043067
actin-mediated cell contraction	Biological Process	GO:0070252	2	88	103	17517	0.0194174757281553	0.00502369127133642	0.0947166542	0.5239093	hsa:9722,NOS1AP,9722:up|hsa:56288,PARD3,56288:up	http://amigo.geneontology.org/cgi-bin/amigo/term_details?term=GO:0070252
protein complex disassembly	Biological Process	GO:0043241	4	294	103	17517	0.0388349514563107	0.0167836958383285	0.0953016369	0.5239093	hsa:6202,RPS8,6202:down|hsa:6143,RPL19,6143:down|hsa:6187,RPS2,6187:down|hsa:6161,RPL32,6161:down	http://amigo.geneontology.org/cgi-bin/amigo/term_details?term=GO:0043241
positive regulation of nucleoside metabolic process	Biological Process	GO:0045979	1	17	103	17517	0.00970873786407767	0.000970485813780899	0.0954349235	0.5239093	hsa:3091,HIF1A,3091:up	http://amigo.geneontology.org/cgi-bin/amigo/term_details?term=GO:0045979
epithelial cell fate commitment	Biological Process	GO:0072148	1	17	103	17517	0.00970873786407767	0.000970485813780899	0.0954349235	0.5239093	hsa:90,ACVR1,90:up	http://amigo.geneontology.org/cgi-bin/amigo/term_details?term=GO:0072148
mRNA cleavage	Biological Process	GO:0006379	1	17	103	17517	0.00970873786407767	0.000970485813780899	0.0954349235	0.5239093	hsa:10978,CLP1,10978:up	http://amigo.geneontology.org/cgi-bin/amigo/term_details?term=GO:0006379
epithelial cell maturation	Biological Process	GO:0002070	1	17	103	17517	0.00970873786407767	0.000970485813780899	0.0954349235	0.5239093	hsa:3091,HIF1A,3091:up	http://amigo.geneontology.org/cgi-bin/amigo/term_details?term=GO:0002070
negative regulation of T cell apoptotic process	Biological Process	GO:0070233	1	17	103	17517	0.00970873786407767	0.000970485813780899	0.0954349235	0.5239093	hsa:3091,HIF1A,3091:up	http://amigo.geneontology.org/cgi-bin/amigo/term_details?term=GO:0070233
positive regulation of insulin secretion involved in cellular response to glucose stimulus	Biological Process	GO:0035774	1	17	103	17517	0.00970873786407767	0.000970485813780899	0.0954349235	0.5239093	hsa:3091,HIF1A,3091:up	http://amigo.geneontology.org/cgi-bin/amigo/term_details?term=GO:0035774
positive regulation of defense response to virus by host	Biological Process	GO:0002230	1	17	103	17517	0.00970873786407767	0.000970485813780899	0.0954349235	0.5239093	hsa:115004,MB21D1,115004:down	http://amigo.geneontology.org/cgi-bin/amigo/term_details?term=GO:0002230
muscle cell fate commitment	Biological Process	GO:0042693	1	17	103	17517	0.00970873786407767	0.000970485813780899	0.0954349235	0.5239093	hsa:90,ACVR1,90:up	http://amigo.geneontology.org/cgi-bin/amigo/term_details?term=GO:0042693
atrial septum development	Biological Process	GO:0003283	1	17	103	17517	0.00970873786407767	0.000970485813780899	0.0954349235	0.5239093	hsa:90,ACVR1,90:up	http://amigo.geneontology.org/cgi-bin/amigo/term_details?term=GO:0003283
arginine metabolic process	Biological Process	GO:0006525	1	17	103	17517	0.00970873786407767	0.000970485813780899	0.0954349235	0.5239093	hsa:1373,CPS1,1373:up	http://amigo.geneontology.org/cgi-bin/amigo/term_details?term=GO:0006525
atrioventricular valve development	Biological Process	GO:0003171	1	17	103	17517	0.00970873786407767	0.000970485813780899	0.0954349235	0.5239093	hsa:90,ACVR1,90:up	http://amigo.geneontology.org/cgi-bin/amigo/term_details?term=GO:0003171
pharyngeal system development	Biological Process	GO:0060037	1	17	103	17517	0.00970873786407767	0.000970485813780899	0.0954349235	0.5239093	hsa:90,ACVR1,90:up	http://amigo.geneontology.org/cgi-bin/amigo/term_details?term=GO:0060037
cardiac muscle cell differentiation	Biological Process	GO:0055007	2	89	103	17517	0.0194174757281553	0.00508077867214706	0.0965362557	0.5251485	hsa:90,ACVR1,90:up|hsa:2274,FHL2,2274:up	http://amigo.geneontology.org/cgi-bin/amigo/term_details?term=GO:0055007
amide biosynthetic process	Biological Process	GO:0043604	2	89	103	17517	0.0194174757281553	0.00508077867214706	0.0965362557	0.5251485	hsa:1373,CPS1,1373:up|hsa:3029,HAGH,3029:down	http://amigo.geneontology.org/cgi-bin/amigo/term_details?term=GO:0043604
embryonic placenta development	Biological Process	GO:0001892	2	89	103	17517	0.0194174757281553	0.00508077867214706	0.0965362557	0.5251485	hsa:3091,HIF1A,3091:up|hsa:2709,GJB5,2709:down	http://amigo.geneontology.org/cgi-bin/amigo/term_details?term=GO:0001892
cell-cell junction assembly	Biological Process	GO:0007043	2	89	103	17517	0.0194174757281553	0.00508077867214706	0.0965362557	0.5251485	hsa:153562,MARVELD2,153562:down|hsa:56288,PARD3,56288:up	http://amigo.geneontology.org/cgi-bin/amigo/term_details?term=GO:0007043
translation	Biological Process	GO:0006412	6	539	103	17517	0.058252427184466	0.0307701090369355	0.0981112474	0.5314859	hsa:6202,RPS8,6202:down|hsa:6143,RPL19,6143:down|hsa:140032,RPS4Y2,140032:down|hsa:6187,RPS2,6187:down|hsa:339345,NANOS2,339345:up|hsa:6161,RPL32,6161:down	http://amigo.geneontology.org/cgi-bin/amigo/term_details?term=GO:0006412
intestinal epithelial cell differentiation	Biological Process	GO:0060575	1	18	103	17517	0.00970873786407767	0.00102757321459154	0.1007589351	0.5335997	hsa:3091,HIF1A,3091:up	http://amigo.geneontology.org/cgi-bin/amigo/term_details?term=GO:0060575
negative regulation of biomineral tissue development	Biological Process	GO:0070168	1	18	103	17517	0.00970873786407767	0.00102757321459154	0.1007589351	0.5335997	hsa:3091,HIF1A,3091:up	http://amigo.geneontology.org/cgi-bin/amigo/term_details?term=GO:0070168
muscle cell cellular homeostasis	Biological Process	GO:0046716	1	18	103	17517	0.00970873786407767	0.00102757321459154	0.1007589351	0.5335997	hsa:3091,HIF1A,3091:up	http://amigo.geneontology.org/cgi-bin/amigo/term_details?term=GO:0046716
mRNA transcription	Biological Process	GO:0009299	1	18	103	17517	0.00970873786407767	0.00102757321459154	0.1007589351	0.5335997	hsa:3091,HIF1A,3091:up	http://amigo.geneontology.org/cgi-bin/amigo/term_details?term=GO:0009299
regulation of synaptic vesicle exocytosis	Biological Process	GO:2000300	1	18	103	17517	0.00970873786407767	0.00102757321459154	0.1007589351	0.5335997	hsa:5864,RAB3A,5864:down	http://amigo.geneontology.org/cgi-bin/amigo/term_details?term=GO:2000300
retina vasculature development in camera-type eye	Biological Process	GO:0061298	1	18	103	17517	0.00970873786407767	0.00102757321459154	0.1007589351	0.5335997	hsa:3091,HIF1A,3091:up	http://amigo.geneontology.org/cgi-bin/amigo/term_details?term=GO:0061298
negative regulation of meiotic cell cycle	Biological Process	GO:0051447	1	18	103	17517	0.00970873786407767	0.00102757321459154	0.1007589351	0.5335997	hsa:339345,NANOS2,339345:up	http://amigo.geneontology.org/cgi-bin/amigo/term_details?term=GO:0051447
pyruvate metabolic process	Biological Process	GO:0006090	2	92	103	17517	0.0194174757281553	0.00525204087457898	0.1020544250	0.5368307	hsa:2821,GPI,2821:up|hsa:3091,HIF1A,3091:up	http://amigo.geneontology.org/cgi-bin/amigo/term_details?term=GO:0006090
ribonucleoside metabolic process	Biological Process	GO:0009119	4	302	103	17517	0.0388349514563107	0.0172403950448136	0.1025766777	0.5368307	hsa:2821,GPI,2821:up|hsa:4538,ND4,4538:down|hsa:3091,HIF1A,3091:up|hsa:4537,ND3,4537:up	http://amigo.geneontology.org/cgi-bin/amigo/term_details?term=GO:0009119
single-organism intracellular transport	Biological Process	GO:1902582	12	1363	103	17517	0.116504854368932	0.0778101273049038	0.1035025090	0.5368307	hsa:6202,RPS8,6202:down|hsa:6892,TAPBP,6892:up|hsa:6187,RPS2,6187:down|hsa:57222,ERGIC1,57222:down|hsa:55023,PHIP,55023:up|hsa:6161,RPL32,6161:down|hsa:3091,HIF1A,3091:up|hsa:6143,RPL19,6143:down|hsa:26019,UPF2,26019:up|hsa:2495,FTH1,2495:down|hsa:56288,PARD3,56288:up|hsa:8548,BLZF1,8548:up	http://amigo.geneontology.org/cgi-bin/amigo/term_details?term=GO:1902582
macromolecular complex disassembly	Biological Process	GO:0032984	4	303	103	17517	0.0388349514563107	0.0172974824456243	0.1035037604	0.5368307	hsa:6202,RPS8,6202:down|hsa:6143,RPL19,6143:down|hsa:6187,RPS2,6187:down|hsa:6161,RPL32,6161:down	http://amigo.geneontology.org/cgi-bin/amigo/term_details?term=GO:0032984
iron ion homeostasis	Biological Process	GO:0055072	2	93	103	17517	0.0194174757281553	0.00530912827538962	0.1039130162	0.5368307	hsa:2495,FTH1,2495:down|hsa:3091,HIF1A,3091:up	http://amigo.geneontology.org/cgi-bin/amigo/term_details?term=GO:0055072
tRNA processing	Biological Process	GO:0008033	2	94	103	17517	0.0194174757281553	0.00536621567620026	0.1057809188	0.5368307	hsa:152992,TRMT44,152992:up|hsa:10978,CLP1,10978:up	http://amigo.geneontology.org/cgi-bin/amigo/term_details?term=GO:0008033
endothelium development	Biological Process	GO:0003158	2	94	103	17517	0.0194174757281553	0.00536621567620026	0.1057809188	0.5368307	hsa:90,ACVR1,90:up|hsa:153562,MARVELD2,153562:down	http://amigo.geneontology.org/cgi-bin/amigo/term_details?term=GO:0003158
positive regulation of potassium ion transmembrane transport	Biological Process	GO:1901381	1	19	103	17517	0.00970873786407767	0.00108466061540218	0.1060519135	0.5368307	hsa:9722,NOS1AP,9722:up	http://amigo.geneontology.org/cgi-bin/amigo/term_details?term=GO:1901381
negative regulation of oxidative stress-induced intrinsic apoptotic signaling pathway	Biological Process	GO:1902176	1	19	103	17517	0.00970873786407767	0.00108466061540218	0.1060519135	0.5368307	hsa:3091,HIF1A,3091:up	http://amigo.geneontology.org/cgi-bin/amigo/term_details?term=GO:1902176
regulation of lipopolysaccharide-mediated signaling pathway	Biological Process	GO:0031664	1	19	103	17517	0.00970873786407767	0.00108466061540218	0.1060519135	0.5368307	hsa:58509,CACTIN,58509:up	http://amigo.geneontology.org/cgi-bin/amigo/term_details?term=GO:0031664
epiboly involved in wound healing	Biological Process	GO:0090505	1	19	103	17517	0.00970873786407767	0.00108466061540218	0.1060519135	0.5368307	hsa:56288,PARD3,56288:up	http://amigo.geneontology.org/cgi-bin/amigo/term_details?term=GO:0090505
wound healing, spreading of cells	Biological Process	GO:0044319	1	19	103	17517	0.00970873786407767	0.00108466061540218	0.1060519135	0.5368307	hsa:56288,PARD3,56288:up	http://amigo.geneontology.org/cgi-bin/amigo/term_details?term=GO:0044319
thymocyte apoptotic process	Biological Process	GO:0070242	1	19	103	17517	0.00970873786407767	0.00108466061540218	0.1060519135	0.5368307	hsa:3091,HIF1A,3091:up	http://amigo.geneontology.org/cgi-bin/amigo/term_details?term=GO:0070242
glutamine family amino acid biosynthetic process	Biological Process	GO:0009084	1	19	103	17517	0.00970873786407767	0.00108466061540218	0.1060519135	0.5368307	hsa:1373,CPS1,1373:up	http://amigo.geneontology.org/cgi-bin/amigo/term_details?term=GO:0009084
positive regulation of transcription from RNA polymerase II promoter in response to stress	Biological Process	GO:0036003	1	19	103	17517	0.00970873786407767	0.00108466061540218	0.1060519135	0.5368307	hsa:3091,HIF1A,3091:up	http://amigo.geneontology.org/cgi-bin/amigo/term_details?term=GO:0036003
positive regulation of mRNA catabolic process	Biological Process	GO:0061014	1	19	103	17517	0.00970873786407767	0.00108466061540218	0.1060519135	0.5368307	hsa:339345,NANOS2,339345:up	http://amigo.geneontology.org/cgi-bin/amigo/term_details?term=GO:0061014
protein targeting	Biological Process	GO:0006605	6	551	103	17517	0.058252427184466	0.0314551578466632	0.1060953698	0.5368307	hsa:6202,RPS8,6202:down|hsa:6143,RPL19,6143:down|hsa:6187,RPS2,6187:down|hsa:55023,PHIP,55023:up|hsa:6161,RPL32,6161:down|hsa:56288,PARD3,56288:up	http://amigo.geneontology.org/cgi-bin/amigo/term_details?term=GO:0006605
epithelial cell migration	Biological Process	GO:0010631	3	194	103	17517	0.029126213592233	0.0110749557572644	0.1063844338	0.5368307	hsa:154810,AMOTL1,154810:up|hsa:3091,HIF1A,3091:up|hsa:23473,CAPN7,23473:up	http://amigo.geneontology.org/cgi-bin/amigo/term_details?term=GO:0010631
regulation of cytokine-mediated signaling pathway	Biological Process	GO:0001959	2	95	103	17517	0.0194174757281553	0.0054233030770109	0.1076579618	0.5368307	hsa:3091,HIF1A,3091:up|hsa:58509,CACTIN,58509:up	http://amigo.geneontology.org/cgi-bin/amigo/term_details?term=GO:0001959
negative regulation of extrinsic apoptotic signaling pathway	Biological Process	GO:2001237	2	96	103	17517	0.0194174757281553	0.00548039047782154	0.1095439759	0.5368307	hsa:55023,PHIP,55023:up|hsa:90,ACVR1,90:up	http://amigo.geneontology.org/cgi-bin/amigo/term_details?term=GO:2001237
determination of left/right symmetry	Biological Process	GO:0007368	2	96	103	17517	0.0194174757281553	0.00548039047782154	0.1095439759	0.5368307	hsa:90,ACVR1,90:up|hsa:3091,HIF1A,3091:up	http://amigo.geneontology.org/cgi-bin/amigo/term_details?term=GO:0007368
epithelium migration	Biological Process	GO:0090132	3	197	103	17517	0.029126213592233	0.0112462179596963	0.1100722180	0.5368307	hsa:154810,AMOTL1,154810:up|hsa:3091,HIF1A,3091:up|hsa:23473,CAPN7,23473:up	http://amigo.geneontology.org/cgi-bin/amigo/term_details?term=GO:0090132
negative regulation of apoptotic signaling pathway	Biological Process	GO:2001234	3	197	103	17517	0.029126213592233	0.0112462179596963	0.1100722180	0.5368307	hsa:55023,PHIP,55023:up|hsa:90,ACVR1,90:up|hsa:3091,HIF1A,3091:up	http://amigo.geneontology.org/cgi-bin/amigo/term_details?term=GO:2001234
labyrinthine layer morphogenesis	Biological Process	GO:0060713	1	20	103	17517	0.00970873786407767	0.00114174801621282	0.1113140379	0.5368307	hsa:2709,GJB5,2709:down	http://amigo.geneontology.org/cgi-bin/amigo/term_details?term=GO:0060713
positive regulation of neuroblast proliferation	Biological Process	GO:0002052	1	20	103	17517	0.00970873786407767	0.00114174801621282	0.1113140379	0.5368307	hsa:3091,HIF1A,3091:up	http://amigo.geneontology.org/cgi-bin/amigo/term_details?term=GO:0002052
ventricular cardiac muscle cell differentiation	Biological Process	GO:0055012	1	20	103	17517	0.00970873786407767	0.00114174801621282	0.1113140379	0.5368307	hsa:2274,FHL2,2274:up	http://amigo.geneontology.org/cgi-bin/amigo/term_details?term=GO:0055012
positive regulation of peptidyl-threonine phosphorylation	Biological Process	GO:0010800	1	20	103	17517	0.00970873786407767	0.00114174801621282	0.1113140379	0.5368307	hsa:55023,PHIP,55023:up	http://amigo.geneontology.org/cgi-bin/amigo/term_details?term=GO:0010800
mammary gland lobule development	Biological Process	GO:0061377	1	20	103	17517	0.00970873786407767	0.00114174801621282	0.1113140379	0.5368307	hsa:3091,HIF1A,3091:up	http://amigo.geneontology.org/cgi-bin/amigo/term_details?term=GO:0061377
mammary gland alveolus development	Biological Process	GO:0060749	1	20	103	17517	0.00970873786407767	0.00114174801621282	0.1113140379	0.5368307	hsa:3091,HIF1A,3091:up	http://amigo.geneontology.org/cgi-bin/amigo/term_details?term=GO:0060749
epiboly	Biological Process	GO:0090504	1	20	103	17517	0.00970873786407767	0.00114174801621282	0.1113140379	0.5368307	hsa:56288,PARD3,56288:up	http://amigo.geneontology.org/cgi-bin/amigo/term_details?term=GO:0090504
axonal fasciculation	Biological Process	GO:0007413	1	20	103	17517	0.00970873786407767	0.00114174801621282	0.1113140379	0.5368307	hsa:2043,EPHA4,2043:up	http://amigo.geneontology.org/cgi-bin/amigo/term_details?term=GO:0007413
regulation of voltage-gated calcium channel activity	Biological Process	GO:1901385	1	20	103	17517	0.00970873786407767	0.00114174801621282	0.1113140379	0.5368307	hsa:9722,NOS1AP,9722:up	http://amigo.geneontology.org/cgi-bin/amigo/term_details?term=GO:1901385
cortical actin cytoskeleton organization	Biological Process	GO:0030866	1	20	103	17517	0.00970873786407767	0.00114174801621282	0.1113140379	0.5368307	hsa:752,FMNL1,752:down	http://amigo.geneontology.org/cgi-bin/amigo/term_details?term=GO:0030866
regulation of receptor biosynthetic process	Biological Process	GO:0010869	1	20	103	17517	0.00970873786407767	0.00114174801621282	0.1113140379	0.5368307	hsa:3091,HIF1A,3091:up	http://amigo.geneontology.org/cgi-bin/amigo/term_details?term=GO:0010869
epithelial cell differentiation	Biological Process	GO:0030855	6	560	103	17517	0.058252427184466	0.031968944453959	0.1123008529	0.5379022	hsa:1373,CPS1,1373:up|hsa:90,ACVR1,90:up|hsa:3091,HIF1A,3091:up|hsa:153562,MARVELD2,153562:down|hsa:56288,PARD3,56288:up|hsa:353131,LCE1A,353131:up	http://amigo.geneontology.org/cgi-bin/amigo/term_details?term=GO:0030855
epithelial cell development	Biological Process	GO:0002064	3	199	103	17517	0.029126213592233	0.0113603927613176	0.1125581187	0.5379022	hsa:3091,HIF1A,3091:up|hsa:153562,MARVELD2,153562:down|hsa:56288,PARD3,56288:up	http://amigo.geneontology.org/cgi-bin/amigo/term_details?term=GO:0002064
tissue migration	Biological Process	GO:0090130	3	199	103	17517	0.029126213592233	0.0113603927613176	0.1125581187	0.5379022	hsa:154810,AMOTL1,154810:up|hsa:3091,HIF1A,3091:up|hsa:23473,CAPN7,23473:up	http://amigo.geneontology.org/cgi-bin/amigo/term_details?term=GO:0090130
bone mineralization	Biological Process	GO:0030282	2	98	103	17517	0.0194174757281553	0.00559456527944283	0.1133422479	0.5384318	hsa:90,ACVR1,90:up|hsa:3091,HIF1A,3091:up	http://amigo.geneontology.org/cgi-bin/amigo/term_details?term=GO:0030282
cellular transition metal ion homeostasis	Biological Process	GO:0046916	2	98	103	17517	0.0194174757281553	0.00559456527944283	0.1133422479	0.5384318	hsa:2495,FTH1,2495:down|hsa:3091,HIF1A,3091:up	http://amigo.geneontology.org/cgi-bin/amigo/term_details?term=GO:0046916
generation of precursor metabolites and energy	Biological Process	GO:0006091	5	436	103	17517	0.0485436893203883	0.0248901067534395	0.1143688171	0.5418462	hsa:1373,CPS1,1373:up|hsa:2821,GPI,2821:up|hsa:4538,ND4,4538:down|hsa:3091,HIF1A,3091:up|hsa:4537,ND3,4537:up	http://amigo.geneontology.org/cgi-bin/amigo/term_details?term=GO:0006091
gliogenesis	Biological Process	GO:0042063	3	202	103	17517	0.029126213592233	0.0115316549637495	0.1163272203	0.5418462	hsa:10397,NDRG1,10397:up|hsa:56288,PARD3,56288:up|hsa:2043,EPHA4,2043:up	http://amigo.geneontology.org/cgi-bin/amigo/term_details?term=GO:0042063
positive regulation of regulated secretory pathway	Biological Process	GO:1903307	1	21	103	17517	0.00970873786407767	0.00119883541702346	0.1165454864	0.5418462	hsa:5864,RAB3A,5864:down	http://amigo.geneontology.org/cgi-bin/amigo/term_details?term=GO:1903307
regulation of hormone biosynthetic process	Biological Process	GO:0046885	1	21	103	17517	0.00970873786407767	0.00119883541702346	0.1165454864	0.5418462	hsa:3091,HIF1A,3091:up	http://amigo.geneontology.org/cgi-bin/amigo/term_details?term=GO:0046885
ventricular cardiac muscle cell action potential	Biological Process	GO:0086005	1	21	103	17517	0.00970873786407767	0.00119883541702346	0.1165454864	0.5418462	hsa:9722,NOS1AP,9722:up	http://amigo.geneontology.org/cgi-bin/amigo/term_details?term=GO:0086005
positive regulation of erythrocyte differentiation	Biological Process	GO:0045648	1	21	103	17517	0.00970873786407767	0.00119883541702346	0.1165454864	0.5418462	hsa:3091,HIF1A,3091:up	http://amigo.geneontology.org/cgi-bin/amigo/term_details?term=GO:0045648
negative regulation of TOR signaling	Biological Process	GO:0032007	1	21	103	17517	0.00970873786407767	0.00119883541702346	0.1165454864	0.5418462	hsa:3091,HIF1A,3091:up	http://amigo.geneontology.org/cgi-bin/amigo/term_details?term=GO:0032007
negative regulation of toll-like receptor signaling pathway	Biological Process	GO:0034122	1	21	103	17517	0.00970873786407767	0.00119883541702346	0.1165454864	0.5418462	hsa:58509,CACTIN,58509:up	http://amigo.geneontology.org/cgi-bin/amigo/term_details?term=GO:0034122
response to dexamethasone	Biological Process	GO:0071548	1	21	103	17517	0.00970873786407767	0.00119883541702346	0.1165454864	0.5418462	hsa:1373,CPS1,1373:up	http://amigo.geneontology.org/cgi-bin/amigo/term_details?term=GO:0071548
regulation of growth	Biological Process	GO:0040008	6	567	103	17517	0.058252427184466	0.0323685562596335	0.1172541225	0.5440863	hsa:55841,WWC3,55841:up|hsa:55023,PHIP,55023:up|hsa:3091,HIF1A,3091:up|hsa:56160,NDNL2,56160:up|hsa:149428,BNIPL,149428:up|hsa:8548,BLZF1,8548:up	http://amigo.geneontology.org/cgi-bin/amigo/term_details?term=GO:0040008
regulation of response to cytokine stimulus	Biological Process	GO:0060759	2	101	103	17517	0.0194174757281553	0.00576582748187475	0.1191027982	0.5490032	hsa:3091,HIF1A,3091:up|hsa:58509,CACTIN,58509:up	http://amigo.geneontology.org/cgi-bin/amigo/term_details?term=GO:0060759
cellular component maintenance	Biological Process	GO:0043954	1	22	103	17517	0.00970873786407767	0.0012559228178341	0.1217464360	0.5490032	hsa:5864,RAB3A,5864:down	http://amigo.geneontology.org/cgi-bin/amigo/term_details?term=GO:0043954
regulation of vesicle fusion	Biological Process	GO:0031338	1	22	103	17517	0.00970873786407767	0.0012559228178341	0.1217464360	0.5490032	hsa:5864,RAB3A,5864:down	http://amigo.geneontology.org/cgi-bin/amigo/term_details?term=GO:0031338
nucleus localization	Biological Process	GO:0051647	1	22	103	17517	0.00970873786407767	0.0012559228178341	0.1217464360	0.5490032	hsa:199953,TMEM201,199953:down	http://amigo.geneontology.org/cgi-bin/amigo/term_details?term=GO:0051647
regulation of action potential	Biological Process	GO:0098900	1	22	103	17517	0.00970873786407767	0.0012559228178341	0.1217464360	0.5490032	hsa:9722,NOS1AP,9722:up	http://amigo.geneontology.org/cgi-bin/amigo/term_details?term=GO:0098900
negative regulation of retinoic acid receptor signaling pathway	Biological Process	GO:0048387	1	22	103	17517	0.00970873786407767	0.0012559228178341	0.1217464360	0.5490032	hsa:653619,PRAMEF15,653619:up	http://amigo.geneontology.org/cgi-bin/amigo/term_details?term=GO:0048387
nitric oxide mediated signal transduction	Biological Process	GO:0007263	1	22	103	17517	0.00970873786407767	0.0012559228178341	0.1217464360	0.5490032	hsa:9722,NOS1AP,9722:up	http://amigo.geneontology.org/cgi-bin/amigo/term_details?term=GO:0007263
regulation of transforming growth factor beta production	Biological Process	GO:0071634	1	22	103	17517	0.00970873786407767	0.0012559228178341	0.1217464360	0.5490032	hsa:3091,HIF1A,3091:up	http://amigo.geneontology.org/cgi-bin/amigo/term_details?term=GO:0071634
regulation of mRNA catabolic process	Biological Process	GO:0061013	1	22	103	17517	0.00970873786407767	0.0012559228178341	0.1217464360	0.5490032	hsa:339345,NANOS2,339345:up	http://amigo.geneontology.org/cgi-bin/amigo/term_details?term=GO:0061013
glucose 6-phosphate metabolic process	Biological Process	GO:0051156	1	22	103	17517	0.00970873786407767	0.0012559228178341	0.1217464360	0.5490032	hsa:2821,GPI,2821:up	http://amigo.geneontology.org/cgi-bin/amigo/term_details?term=GO:0051156
peptidyl-cysteine modification	Biological Process	GO:0018198	1	22	103	17517	0.00970873786407767	0.0012559228178341	0.1217464360	0.5490032	hsa:9722,NOS1AP,9722:up	http://amigo.geneontology.org/cgi-bin/amigo/term_details?term=GO:0018198
positive regulation of blood vessel endothelial cell migration	Biological Process	GO:0043536	1	22	103	17517	0.00970873786407767	0.0012559228178341	0.1217464360	0.5490032	hsa:154810,AMOTL1,154810:up	http://amigo.geneontology.org/cgi-bin/amigo/term_details?term=GO:0043536
neuromuscular synaptic transmission	Biological Process	GO:0007274	1	22	103	17517	0.00970873786407767	0.0012559228178341	0.1217464360	0.5490032	hsa:5864,RAB3A,5864:down	http://amigo.geneontology.org/cgi-bin/amigo/term_details?term=GO:0007274
nucleoside metabolic process	Biological Process	GO:0009116	4	323	103	17517	0.0388349514563107	0.0184392304618371	0.1228410988	0.5529002	hsa:2821,GPI,2821:up|hsa:4538,ND4,4538:down|hsa:3091,HIF1A,3091:up|hsa:4537,ND3,4537:up	http://amigo.geneontology.org/cgi-bin/amigo/term_details?term=GO:0009116
cell death	Biological Process	GO:0008219	15	1850	103	17517	0.145631067961165	0.105611691499686	0.1241713014	0.5535892	hsa:55023,PHIP,55023:up|hsa:90,ACVR1,90:up|hsa:3091,HIF1A,3091:up|hsa:23263,MCF2L,23263:down|hsa:2274,FHL2,2274:up|hsa:4293,MAP3K9,4293:down|hsa:79073,TMEM109,79073:down|hsa:10553,HTATIP2,10553:down|hsa:2821,GPI,2821:up|hsa:23567,ZNF346,23567:up|hsa:30011,SH3KBP1,30011:down|hsa:9722,NOS1AP,9722:up|hsa:64857,PLEKHG2,64857:down|hsa:653619,PRAMEF15,653619:up|hsa:149428,BNIPL,149428:up	http://amigo.geneontology.org/cgi-bin/amigo/term_details?term=GO:0008219
actin filament-based movement	Biological Process	GO:0030048	2	104	103	17517	0.0194174757281553	0.00593708968430667	0.1249352571	0.5535892	hsa:9722,NOS1AP,9722:up|hsa:56288,PARD3,56288:up	http://amigo.geneontology.org/cgi-bin/amigo/term_details?term=GO:0030048
myelination	Biological Process	GO:0042552	2	104	103	17517	0.0194174757281553	0.00593708968430667	0.1249352571	0.5535892	hsa:10397,NDRG1,10397:up|hsa:56288,PARD3,56288:up	http://amigo.geneontology.org/cgi-bin/amigo/term_details?term=GO:0042552
death	Biological Process	GO:0016265	15	1854	103	17517	0.145631067961165	0.105840041102929	0.1258062755	0.5535892	hsa:55023,PHIP,55023:up|hsa:90,ACVR1,90:up|hsa:3091,HIF1A,3091:up|hsa:23263,MCF2L,23263:down|hsa:2274,FHL2,2274:up|hsa:4293,MAP3K9,4293:down|hsa:79073,TMEM109,79073:down|hsa:10553,HTATIP2,10553:down|hsa:2821,GPI,2821:up|hsa:23567,ZNF346,23567:up|hsa:30011,SH3KBP1,30011:down|hsa:9722,NOS1AP,9722:up|hsa:64857,PLEKHG2,64857:down|hsa:653619,PRAMEF15,653619:up|hsa:149428,BNIPL,149428:up	http://amigo.geneontology.org/cgi-bin/amigo/term_details?term=GO:0016265
negative regulation of protein phosphorylation	Biological Process	GO:0001933	4	327	103	17517	0.0388349514563107	0.0186675800650796	0.1268840867	0.5535892	hsa:5999,RGS4,5999:down|hsa:1850,DUSP8,1850:up|hsa:58509,CACTIN,58509:up|hsa:56288,PARD3,56288:up	http://amigo.geneontology.org/cgi-bin/amigo/term_details?term=GO:0001933
negative regulation of signal transduction	Biological Process	GO:0009968	9	988	103	17517	0.087378640776699	0.0564023520009134	0.1268894802	0.5535892	hsa:5999,RGS4,5999:down|hsa:55841,WWC3,55841:up|hsa:55023,PHIP,55023:up|hsa:90,ACVR1,90:up|hsa:1850,DUSP8,1850:up|hsa:3091,HIF1A,3091:up|hsa:58509,CACTIN,58509:up|hsa:30011,SH3KBP1,30011:down|hsa:653619,PRAMEF15,653619:up	http://amigo.geneontology.org/cgi-bin/amigo/term_details?term=GO:0009968
determination of bilateral symmetry	Biological Process	GO:0009855	2	105	103	17517	0.0194174757281553	0.00599417708511731	0.1268946553	0.5535892	hsa:90,ACVR1,90:up|hsa:3091,HIF1A,3091:up	http://amigo.geneontology.org/cgi-bin/amigo/term_details?term=GO:0009855
embryonic placenta morphogenesis	Biological Process	GO:0060669	1	23	103	17517	0.00970873786407767	0.00131301021864475	0.1269170629	0.5535892	hsa:2709,GJB5,2709:down	http://amigo.geneontology.org/cgi-bin/amigo/term_details?term=GO:0060669
regulation of dendritic spine morphogenesis	Biological Process	GO:0061001	1	23	103	17517	0.00970873786407767	0.00131301021864475	0.1269170629	0.5535892	hsa:2043,EPHA4,2043:up	http://amigo.geneontology.org/cgi-bin/amigo/term_details?term=GO:0061001
negative regulation of organ growth	Biological Process	GO:0046621	1	23	103	17517	0.00970873786407767	0.00131301021864475	0.1269170629	0.5535892	hsa:55841,WWC3,55841:up	http://amigo.geneontology.org/cgi-bin/amigo/term_details?term=GO:0046621
regulation of activin receptor signaling pathway	Biological Process	GO:0032925	1	23	103	17517	0.00970873786407767	0.00131301021864475	0.1269170629	0.5535892	hsa:90,ACVR1,90:up	http://amigo.geneontology.org/cgi-bin/amigo/term_details?term=GO:0032925
central nervous system projection neuron axonogenesis	Biological Process	GO:0021952	1	23	103	17517	0.00970873786407767	0.00131301021864475	0.1269170629	0.5535892	hsa:2043,EPHA4,2043:up	http://amigo.geneontology.org/cgi-bin/amigo/term_details?term=GO:0021952
positive regulation of transcription from RNA polymerase II promoter involved in cellular response to chemical stimulus	Biological Process	GO:1901522	1	23	103	17517	0.00970873786407767	0.00131301021864475	0.1269170629	0.5535892	hsa:3091,HIF1A,3091:up	http://amigo.geneontology.org/cgi-bin/amigo/term_details?term=GO:1901522
transforming growth factor beta production	Biological Process	GO:0071604	1	23	103	17517	0.00970873786407767	0.00131301021864475	0.1269170629	0.5535892	hsa:3091,HIF1A,3091:up	http://amigo.geneontology.org/cgi-bin/amigo/term_details?term=GO:0071604
cortical cytoskeleton organization	Biological Process	GO:0030865	1	23	103	17517	0.00970873786407767	0.00131301021864475	0.1269170629	0.5535892	hsa:752,FMNL1,752:down	http://amigo.geneontology.org/cgi-bin/amigo/term_details?term=GO:0030865
regulation of insulin-like growth factor receptor signaling pathway	Biological Process	GO:0043567	1	23	103	17517	0.00970873786407767	0.00131301021864475	0.1269170629	0.5535892	hsa:55023,PHIP,55023:up	http://amigo.geneontology.org/cgi-bin/amigo/term_details?term=GO:0043567
specification of symmetry	Biological Process	GO:0009799	2	106	103	17517	0.0194174757281553	0.00605126448592796	0.1288614189	0.5600336	hsa:90,ACVR1,90:up|hsa:3091,HIF1A,3091:up	http://amigo.geneontology.org/cgi-bin/amigo/term_details?term=GO:0009799
heart morphogenesis	Biological Process	GO:0003007	3	212	103	17517	0.029126213592233	0.0121025289718559	0.1292263482	0.5606040	hsa:90,ACVR1,90:up|hsa:3091,HIF1A,3091:up|hsa:2274,FHL2,2274:up	http://amigo.geneontology.org/cgi-bin/amigo/term_details?term=GO:0003007
negative regulation of cell death	Biological Process	GO:0060548	8	855	103	17517	0.0776699029126214	0.0488097276930981	0.1303584295	0.5614922	hsa:55023,PHIP,55023:up|hsa:90,ACVR1,90:up|hsa:3091,HIF1A,3091:up|hsa:2274,FHL2,2274:up|hsa:79073,TMEM109,79073:down|hsa:10553,HTATIP2,10553:down|hsa:2821,GPI,2821:up|hsa:653619,PRAMEF15,653619:up	http://amigo.geneontology.org/cgi-bin/amigo/term_details?term=GO:0060548
cardiocyte differentiation	Biological Process	GO:0035051	2	107	103	17517	0.0194174757281553	0.0061083518867386	0.1308353958	0.5614922	hsa:90,ACVR1,90:up|hsa:2274,FHL2,2274:up	http://amigo.geneontology.org/cgi-bin/amigo/term_details?term=GO:0035051
axon ensheathment	Biological Process	GO:0008366	2	107	103	17517	0.0194174757281553	0.0061083518867386	0.1308353958	0.5614922	hsa:10397,NDRG1,10397:up|hsa:56288,PARD3,56288:up	http://amigo.geneontology.org/cgi-bin/amigo/term_details?term=GO:0008366
ensheathment of neurons	Biological Process	GO:0007272	2	107	103	17517	0.0194174757281553	0.0061083518867386	0.1308353958	0.5614922	hsa:10397,NDRG1,10397:up|hsa:56288,PARD3,56288:up	http://amigo.geneontology.org/cgi-bin/amigo/term_details?term=GO:0007272
regulation of type I interferon production	Biological Process	GO:0032479	2	107	103	17517	0.0194174757281553	0.0061083518867386	0.1308353958	0.5614922	hsa:115004,MB21D1,115004:down|hsa:58509,CACTIN,58509:up	http://amigo.geneontology.org/cgi-bin/amigo/term_details?term=GO:0032479
positive regulation of JNK cascade	Biological Process	GO:0046330	2	107	103	17517	0.0194174757281553	0.0061083518867386	0.1308353958	0.5614922	hsa:2043,EPHA4,2043:up|hsa:4293,MAP3K9,4293:down	http://amigo.geneontology.org/cgi-bin/amigo/term_details?term=GO:0046330
positive regulation of dendrite morphogenesis	Biological Process	GO:0050775	1	24	103	17517	0.00970873786407767	0.00137009761945539	0.1320575421	0.5617128	hsa:2043,EPHA4,2043:up	http://amigo.geneontology.org/cgi-bin/amigo/term_details?term=GO:0050775
glutamine metabolic process	Biological Process	GO:0006541	1	24	103	17517	0.00970873786407767	0.00137009761945539	0.1320575421	0.5617128	hsa:1373,CPS1,1373:up	http://amigo.geneontology.org/cgi-bin/amigo/term_details?term=GO:0006541
cell differentiation involved in embryonic placenta development	Biological Process	GO:0060706	1	24	103	17517	0.00970873786407767	0.00137009761945539	0.1320575421	0.5617128	hsa:2709,GJB5,2709:down	http://amigo.geneontology.org/cgi-bin/amigo/term_details?term=GO:0060706
receptor biosynthetic process	Biological Process	GO:0032800	1	24	103	17517	0.00970873786407767	0.00137009761945539	0.1320575421	0.5617128	hsa:3091,HIF1A,3091:up	http://amigo.geneontology.org/cgi-bin/amigo/term_details?term=GO:0032800
post-Golgi vesicle-mediated transport	Biological Process	GO:0006892	2	108	103	17517	0.0194174757281553	0.00616543928754924	0.1328164355	0.5639409	hsa:2495,FTH1,2495:down|hsa:8548,BLZF1,8548:up	http://amigo.geneontology.org/cgi-bin/amigo/term_details?term=GO:0006892
nucleic acid phosphodiester bond hydrolysis	Biological Process	GO:0090305	3	215	103	17517	0.029126213592233	0.0122737911742878	0.1331924131	0.5645382	hsa:197342,EME2,197342:up|hsa:79650,USB1,79650:up|hsa:10978,CLP1,10978:up	http://amigo.geneontology.org/cgi-bin/amigo/term_details?term=GO:0090305
positive regulation of nervous system development	Biological Process	GO:0051962	4	335	103	17517	0.0388349514563107	0.0191242792715648	0.1351370513	0.5663789	hsa:3091,HIF1A,3091:up|hsa:56288,PARD3,56288:up|hsa:79816,TLE6,79816:down|hsa:2043,EPHA4,2043:up	http://amigo.geneontology.org/cgi-bin/amigo/term_details?term=GO:0051962
liver development	Biological Process	GO:0001889	2	110	103	17517	0.0194174757281553	0.00627961408917052	0.1367991088	0.5663789	hsa:26019,UPF2,26019:up|hsa:1373,CPS1,1373:up	http://amigo.geneontology.org/cgi-bin/amigo/term_details?term=GO:0001889
type I interferon production	Biological Process	GO:0032606	2	110	103	17517	0.0194174757281553	0.00627961408917052	0.1367991088	0.5663789	hsa:115004,MB21D1,115004:down|hsa:58509,CACTIN,58509:up	http://amigo.geneontology.org/cgi-bin/amigo/term_details?term=GO:0032606
heart trabecula morphogenesis	Biological Process	GO:0061384	1	25	103	17517	0.00970873786407767	0.00142718502026603	0.1371680476	0.5663789	hsa:2274,FHL2,2274:up	http://amigo.geneontology.org/cgi-bin/amigo/term_details?term=GO:0061384
positive regulation of vascular endothelial growth factor production	Biological Process	GO:0010575	1	25	103	17517	0.00970873786407767	0.00142718502026603	0.1371680476	0.5663789	hsa:3091,HIF1A,3091:up	http://amigo.geneontology.org/cgi-bin/amigo/term_details?term=GO:0010575
glutamine family amino acid catabolic process	Biological Process	GO:0009065	1	25	103	17517	0.00970873786407767	0.00142718502026603	0.1371680476	0.5663789	hsa:1373,CPS1,1373:up	http://amigo.geneontology.org/cgi-bin/amigo/term_details?term=GO:0009065
regulation of synaptic vesicle transport	Biological Process	GO:1902803	1	25	103	17517	0.00970873786407767	0.00142718502026603	0.1371680476	0.5663789	hsa:5864,RAB3A,5864:down	http://amigo.geneontology.org/cgi-bin/amigo/term_details?term=GO:1902803
positive regulation of cytokine-mediated signaling pathway	Biological Process	GO:0001961	1	25	103	17517	0.00970873786407767	0.00142718502026603	0.1371680476	0.5663789	hsa:3091,HIF1A,3091:up	http://amigo.geneontology.org/cgi-bin/amigo/term_details?term=GO:0001961
heart valve morphogenesis	Biological Process	GO:0003179	1	25	103	17517	0.00970873786407767	0.00142718502026603	0.1371680476	0.5663789	hsa:90,ACVR1,90:up	http://amigo.geneontology.org/cgi-bin/amigo/term_details?term=GO:0003179
regulation of astrocyte differentiation	Biological Process	GO:0048710	1	25	103	17517	0.00970873786407767	0.00142718502026603	0.1371680476	0.5663789	hsa:2043,EPHA4,2043:up	http://amigo.geneontology.org/cgi-bin/amigo/term_details?term=GO:0048710
peptide biosynthetic process	Biological Process	GO:0043043	1	25	103	17517	0.00970873786407767	0.00142718502026603	0.1371680476	0.5663789	hsa:3029,HAGH,3029:down	http://amigo.geneontology.org/cgi-bin/amigo/term_details?term=GO:0043043
ribosome assembly	Biological Process	GO:0042255	1	25	103	17517	0.00970873786407767	0.00142718502026603	0.1371680476	0.5663789	hsa:51388,NIP7,51388:up	http://amigo.geneontology.org/cgi-bin/amigo/term_details?term=GO:0042255
glycosyl compound metabolic process	Biological Process	GO:1901657	4	340	103	17517	0.0388349514563107	0.019409716275618	0.1404050068	0.5690375	hsa:2821,GPI,2821:up|hsa:4538,ND4,4538:down|hsa:3091,HIF1A,3091:up|hsa:4537,ND3,4537:up	http://amigo.geneontology.org/cgi-bin/amigo/term_details?term=GO:1901657
hepaticobiliary system development	Biological Process	GO:0061008	2	112	103	17517	0.0194174757281553	0.0063937888907918	0.1408082640	0.5690375	hsa:26019,UPF2,26019:up|hsa:1373,CPS1,1373:up	http://amigo.geneontology.org/cgi-bin/amigo/term_details?term=GO:0061008
maturation of SSU-rRNA from tricistronic rRNA transcript (SSU-rRNA, 5.8S rRNA, LSU-rRNA)	Biological Process	GO:0000462	1	26	103	17517	0.00970873786407767	0.00148427242107667	0.1422487525	0.5690375	hsa:6202,RPS8,6202:down	http://amigo.geneontology.org/cgi-bin/amigo/term_details?term=GO:0000462
trabecula formation	Biological Process	GO:0060343	1	26	103	17517	0.00970873786407767	0.00148427242107667	0.1422487525	0.5690375	hsa:2274,FHL2,2274:up	http://amigo.geneontology.org/cgi-bin/amigo/term_details?term=GO:0060343
motor neuron axon guidance	Biological Process	GO:0008045	1	26	103	17517	0.00970873786407767	0.00148427242107667	0.1422487525	0.5690375	hsa:2043,EPHA4,2043:up	http://amigo.geneontology.org/cgi-bin/amigo/term_details?term=GO:0008045
embryonic hemopoiesis	Biological Process	GO:0035162	1	26	103	17517	0.00970873786407767	0.00148427242107667	0.1422487525	0.5690375	hsa:3091,HIF1A,3091:up	http://amigo.geneontology.org/cgi-bin/amigo/term_details?term=GO:0035162
triglyceride catabolic process	Biological Process	GO:0019433	1	26	103	17517	0.00970873786407767	0.00148427242107667	0.1422487525	0.5690375	hsa:1373,CPS1,1373:up	http://amigo.geneontology.org/cgi-bin/amigo/term_details?term=GO:0019433
positive regulation of response to cytokine stimulus	Biological Process	GO:0060760	1	26	103	17517	0.00970873786407767	0.00148427242107667	0.1422487525	0.5690375	hsa:3091,HIF1A,3091:up	http://amigo.geneontology.org/cgi-bin/amigo/term_details?term=GO:0060760
regulation of glycolytic process	Biological Process	GO:0006110	1	26	103	17517	0.00970873786407767	0.00148427242107667	0.1422487525	0.5690375	hsa:3091,HIF1A,3091:up	http://amigo.geneontology.org/cgi-bin/amigo/term_details?term=GO:0006110
glycogen catabolic process	Biological Process	GO:0005980	1	26	103	17517	0.00970873786407767	0.00148427242107667	0.1422487525	0.5690375	hsa:1373,CPS1,1373:up	http://amigo.geneontology.org/cgi-bin/amigo/term_details?term=GO:0005980
positive regulation of viral genome replication	Biological Process	GO:0045070	1	26	103	17517	0.00970873786407767	0.00148427242107667	0.1422487525	0.5690375	hsa:5886,RAD23A,5886:down	http://amigo.geneontology.org/cgi-bin/amigo/term_details?term=GO:0045070
regulation of membrane repolarization	Biological Process	GO:0060306	1	26	103	17517	0.00970873786407767	0.00148427242107667	0.1422487525	0.5690375	hsa:9722,NOS1AP,9722:up	http://amigo.geneontology.org/cgi-bin/amigo/term_details?term=GO:0060306
pyridine nucleotide metabolic process	Biological Process	GO:0019362	2	113	103	17517	0.0194174757281553	0.00645087629160244	0.1428224116	0.5690375	hsa:2821,GPI,2821:up|hsa:3091,HIF1A,3091:up	http://amigo.geneontology.org/cgi-bin/amigo/term_details?term=GO:0019362
nicotinamide nucleotide metabolic process	Biological Process	GO:0046496	2	113	103	17517	0.0194174757281553	0.00645087629160244	0.1428224116	0.5690375	hsa:2821,GPI,2821:up|hsa:3091,HIF1A,3091:up	http://amigo.geneontology.org/cgi-bin/amigo/term_details?term=GO:0046496
regulation of response to biotic stimulus	Biological Process	GO:0002831	2	114	103	17517	0.0194174757281553	0.00650796369241308	0.1448427496	0.5690375	hsa:115004,MB21D1,115004:down|hsa:58509,CACTIN,58509:up	http://amigo.geneontology.org/cgi-bin/amigo/term_details?term=GO:0002831
intracellular protein transport	Biological Process	GO:0006886	8	879	103	17517	0.0776699029126214	0.0501798253125535	0.1456268419	0.5690375	hsa:6202,RPS8,6202:down|hsa:6187,RPS2,6187:down|hsa:55023,PHIP,55023:up|hsa:6161,RPL32,6161:down|hsa:5864,RAB3A,5864:down|hsa:6143,RPL19,6143:down|hsa:56288,PARD3,56288:up|hsa:8548,BLZF1,8548:up	http://amigo.geneontology.org/cgi-bin/amigo/term_details?term=GO:0006886
apoptotic signaling pathway	Biological Process	GO:0097190	6	605	103	17517	0.058252427184466	0.0345378774904379	0.1460070928	0.5690375	hsa:55023,PHIP,55023:up|hsa:90,ACVR1,90:up|hsa:3091,HIF1A,3091:up|hsa:23263,MCF2L,23263:down|hsa:64857,PLEKHG2,64857:down|hsa:79073,TMEM109,79073:down	http://amigo.geneontology.org/cgi-bin/amigo/term_details?term=GO:0097190
regulation of oxidative stress-induced intrinsic apoptotic signaling pathway	Biological Process	GO:1902175	1	27	103	17517	0.00970873786407767	0.00154135982188731	0.1472998290	0.5690375	hsa:3091,HIF1A,3091:up	http://amigo.geneontology.org/cgi-bin/amigo/term_details?term=GO:1902175
morphogenesis of an epithelial fold	Biological Process	GO:0060571	1	27	103	17517	0.00970873786407767	0.00154135982188731	0.1472998290	0.5690375	hsa:3091,HIF1A,3091:up	http://amigo.geneontology.org/cgi-bin/amigo/term_details?term=GO:0060571
synaptic vesicle endocytosis	Biological Process	GO:0048488	1	27	103	17517	0.00970873786407767	0.00154135982188731	0.1472998290	0.5690375	hsa:5864,RAB3A,5864:down	http://amigo.geneontology.org/cgi-bin/amigo/term_details?term=GO:0048488
fibroblast migration	Biological Process	GO:0010761	1	27	103	17517	0.00970873786407767	0.00154135982188731	0.1472998290	0.5690375	hsa:199953,TMEM201,199953:down	http://amigo.geneontology.org/cgi-bin/amigo/term_details?term=GO:0010761
positive regulation of potassium ion transport	Biological Process	GO:0043268	1	27	103	17517	0.00970873786407767	0.00154135982188731	0.1472998290	0.5690375	hsa:9722,NOS1AP,9722:up	http://amigo.geneontology.org/cgi-bin/amigo/term_details?term=GO:0043268
regulation of vascular endothelial growth factor receptor signaling pathway	Biological Process	GO:0030947	1	27	103	17517	0.00970873786407767	0.00154135982188731	0.1472998290	0.5690375	hsa:3091,HIF1A,3091:up	http://amigo.geneontology.org/cgi-bin/amigo/term_details?term=GO:0030947
snRNA metabolic process	Biological Process	GO:0016073	1	27	103	17517	0.00970873786407767	0.00154135982188731	0.1472998290	0.5690375	hsa:79650,USB1,79650:up	http://amigo.geneontology.org/cgi-bin/amigo/term_details?term=GO:0016073
substrate-dependent cell migration	Biological Process	GO:0006929	1	27	103	17517	0.00970873786407767	0.00154135982188731	0.1472998290	0.5690375	hsa:752,FMNL1,752:down	http://amigo.geneontology.org/cgi-bin/amigo/term_details?term=GO:0006929
glucan catabolic process	Biological Process	GO:0009251	1	27	103	17517	0.00970873786407767	0.00154135982188731	0.1472998290	0.5690375	hsa:1373,CPS1,1373:up	http://amigo.geneontology.org/cgi-bin/amigo/term_details?term=GO:0009251
establishment of endothelial barrier	Biological Process	GO:0061028	1	27	103	17517	0.00970873786407767	0.00154135982188731	0.1472998290	0.5690375	hsa:153562,MARVELD2,153562:down	http://amigo.geneontology.org/cgi-bin/amigo/term_details?term=GO:0061028
heart valve development	Biological Process	GO:0003170	1	27	103	17517	0.00970873786407767	0.00154135982188731	0.1472998290	0.5690375	hsa:90,ACVR1,90:up	http://amigo.geneontology.org/cgi-bin/amigo/term_details?term=GO:0003170
negative regulation of lymphocyte apoptotic process	Biological Process	GO:0070229	1	27	103	17517	0.00970873786407767	0.00154135982188731	0.1472998290	0.5690375	hsa:3091,HIF1A,3091:up	http://amigo.geneontology.org/cgi-bin/amigo/term_details?term=GO:0070229
endocardial cushion development	Biological Process	GO:0003197	1	27	103	17517	0.00970873786407767	0.00154135982188731	0.1472998290	0.5690375	hsa:90,ACVR1,90:up	http://amigo.geneontology.org/cgi-bin/amigo/term_details?term=GO:0003197
negative regulation of response to biotic stimulus	Biological Process	GO:0002832	1	27	103	17517	0.00970873786407767	0.00154135982188731	0.1472998290	0.5690375	hsa:58509,CACTIN,58509:up	http://amigo.geneontology.org/cgi-bin/amigo/term_details?term=GO:0002832
negative regulation of phosphorylation	Biological Process	GO:0042326	4	351	103	17517	0.0388349514563107	0.020037677684535	0.1522793225	0.5707725	hsa:5999,RGS4,5999:down|hsa:1850,DUSP8,1850:up|hsa:58509,CACTIN,58509:up|hsa:56288,PARD3,56288:up	http://amigo.geneontology.org/cgi-bin/amigo/term_details?term=GO:0042326
negative regulation of fibroblast proliferation	Biological Process	GO:0048147	1	28	103	17517	0.00970873786407767	0.00159844722269795	0.1523214481	0.5707725	hsa:2495,FTH1,2495:down	http://amigo.geneontology.org/cgi-bin/amigo/term_details?term=GO:0048147
regulation of defense response to virus by host	Biological Process	GO:0050691	1	28	103	17517	0.00970873786407767	0.00159844722269795	0.1523214481	0.5707725	hsa:115004,MB21D1,115004:down	http://amigo.geneontology.org/cgi-bin/amigo/term_details?term=GO:0050691
positive regulation of vasodilation	Biological Process	GO:0045909	1	28	103	17517	0.00970873786407767	0.00159844722269795	0.1523214481	0.5707725	hsa:1373,CPS1,1373:up	http://amigo.geneontology.org/cgi-bin/amigo/term_details?term=GO:0045909
regulation of retinoic acid receptor signaling pathway	Biological Process	GO:0048385	1	28	103	17517	0.00970873786407767	0.00159844722269795	0.1523214481	0.5707725	hsa:653619,PRAMEF15,653619:up	http://amigo.geneontology.org/cgi-bin/amigo/term_details?term=GO:0048385
axon regeneration	Biological Process	GO:0031103	1	28	103	17517	0.00970873786407767	0.00159844722269795	0.1523214481	0.5707725	hsa:2043,EPHA4,2043:up	http://amigo.geneontology.org/cgi-bin/amigo/term_details?term=GO:0031103
respiratory system process	Biological Process	GO:0003016	1	28	103	17517	0.00970873786407767	0.00159844722269795	0.1523214481	0.5707725	hsa:5864,RAB3A,5864:down	http://amigo.geneontology.org/cgi-bin/amigo/term_details?term=GO:0003016
dendritic spine morphogenesis	Biological Process	GO:0060997	1	28	103	17517	0.00970873786407767	0.00159844722269795	0.1523214481	0.5707725	hsa:2043,EPHA4,2043:up	http://amigo.geneontology.org/cgi-bin/amigo/term_details?term=GO:0060997
negative regulation of oxidative stress-induced cell death	Biological Process	GO:1903202	1	28	103	17517	0.00970873786407767	0.00159844722269795	0.1523214481	0.5707725	hsa:3091,HIF1A,3091:up	http://amigo.geneontology.org/cgi-bin/amigo/term_details?term=GO:1903202
cellular polysaccharide catabolic process	Biological Process	GO:0044247	1	28	103	17517	0.00970873786407767	0.00159844722269795	0.1523214481	0.5707725	hsa:1373,CPS1,1373:up	http://amigo.geneontology.org/cgi-bin/amigo/term_details?term=GO:0044247
cellular response to dsRNA	Biological Process	GO:0071359	1	28	103	17517	0.00970873786407767	0.00159844722269795	0.1523214481	0.5707725	hsa:115004,MB21D1,115004:down	http://amigo.geneontology.org/cgi-bin/amigo/term_details?term=GO:0071359
cardiac atrium morphogenesis	Biological Process	GO:0003209	1	28	103	17517	0.00970873786407767	0.00159844722269795	0.1523214481	0.5707725	hsa:90,ACVR1,90:up	http://amigo.geneontology.org/cgi-bin/amigo/term_details?term=GO:0003209
B cell homeostasis	Biological Process	GO:0001782	1	28	103	17517	0.00970873786407767	0.00159844722269795	0.1523214481	0.5707725	hsa:3091,HIF1A,3091:up	http://amigo.geneontology.org/cgi-bin/amigo/term_details?term=GO:0001782
cellular macromolecule catabolic process	Biological Process	GO:0044265	8	890	103	17517	0.0776699029126214	0.0508077867214706	0.1529128844	0.5707725	hsa:6202,RPS8,6202:down|hsa:6187,RPS2,6187:down|hsa:339345,NANOS2,339345:up|hsa:6161,RPL32,6161:down|hsa:51667,NUB1,51667:up|hsa:26019,UPF2,26019:up|hsa:6143,RPL19,6143:down|hsa:5886,RAD23A,5886:down	http://amigo.geneontology.org/cgi-bin/amigo/term_details?term=GO:0044265
RNA 3'-end processing	Biological Process	GO:0031123	2	118	103	17517	0.0194174757281553	0.00673631329565565	0.1529832202	0.5707725	hsa:79650,USB1,79650:up|hsa:10978,CLP1,10978:up	http://amigo.geneontology.org/cgi-bin/amigo/term_details?term=GO:0031123
respiratory electron transport chain	Biological Process	GO:0022904	2	119	103	17517	0.0194174757281553	0.00679340069646629	0.1550324331	0.5761767	hsa:4538,ND4,4538:down|hsa:4537,ND3,4537:up	http://amigo.geneontology.org/cgi-bin/amigo/term_details?term=GO:0022904
pyridine-containing compound metabolic process	Biological Process	GO:0072524	2	120	103	17517	0.0194174757281553	0.00685048809727693	0.1570870152	0.5761767	hsa:2821,GPI,2821:up|hsa:3091,HIF1A,3091:up	http://amigo.geneontology.org/cgi-bin/amigo/term_details?term=GO:0072524
regulation of myelination	Biological Process	GO:0031641	1	29	103	17517	0.00970873786407767	0.00165553462350859	0.1573137799	0.5761767	hsa:56288,PARD3,56288:up	http://amigo.geneontology.org/cgi-bin/amigo/term_details?term=GO:0031641
synaptic vesicle recycling	Biological Process	GO:0036465	1	29	103	17517	0.00970873786407767	0.00165553462350859	0.1573137799	0.5761767	hsa:5864,RAB3A,5864:down	http://amigo.geneontology.org/cgi-bin/amigo/term_details?term=GO:0036465
negative regulation of response to oxidative stress	Biological Process	GO:1902883	1	29	103	17517	0.00970873786407767	0.00165553462350859	0.1573137799	0.5761767	hsa:3091,HIF1A,3091:up	http://amigo.geneontology.org/cgi-bin/amigo/term_details?term=GO:1902883
regulation of vascular endothelial growth factor production	Biological Process	GO:0010574	1	29	103	17517	0.00970873786407767	0.00165553462350859	0.1573137799	0.5761767	hsa:3091,HIF1A,3091:up	http://amigo.geneontology.org/cgi-bin/amigo/term_details?term=GO:0010574
regulation of hormone metabolic process	Biological Process	GO:0032350	1	29	103	17517	0.00970873786407767	0.00165553462350859	0.1573137799	0.5761767	hsa:3091,HIF1A,3091:up	http://amigo.geneontology.org/cgi-bin/amigo/term_details?term=GO:0032350
negative regulation of cellular response to oxidative stress	Biological Process	GO:1900408	1	29	103	17517	0.00970873786407767	0.00165553462350859	0.1573137799	0.5761767	hsa:3091,HIF1A,3091:up	http://amigo.geneontology.org/cgi-bin/amigo/term_details?term=GO:1900408
positive regulation of stress-activated MAPK cascade	Biological Process	GO:0032874	2	121	103	17517	0.0194174757281553	0.00690757549808757	0.1591468344	0.5776002	hsa:2043,EPHA4,2043:up|hsa:4293,MAP3K9,4293:down	http://amigo.geneontology.org/cgi-bin/amigo/term_details?term=GO:0032874
electron transport chain	Biological Process	GO:0022900	2	121	103	17517	0.0194174757281553	0.00690757549808757	0.1591468344	0.5776002	hsa:4538,ND4,4538:down|hsa:4537,ND3,4537:up	http://amigo.geneontology.org/cgi-bin/amigo/term_details?term=GO:0022900
positive regulation of stress-activated protein kinase signaling cascade	Biological Process	GO:0070304	2	122	103	17517	0.0194174757281553	0.00696466289889821	0.1612117599	0.5776002	hsa:2043,EPHA4,2043:up|hsa:4293,MAP3K9,4293:down	http://amigo.geneontology.org/cgi-bin/amigo/term_details?term=GO:0070304
positive regulation of ATPase activity	Biological Process	GO:0032781	1	30	103	17517	0.00970873786407767	0.00171262202431923	0.1622769936	0.5776002	hsa:5864,RAB3A,5864:down	http://amigo.geneontology.org/cgi-bin/amigo/term_details?term=GO:0032781
negative regulation of innate immune response	Biological Process	GO:0045824	1	30	103	17517	0.00970873786407767	0.00171262202431923	0.1622769936	0.5776002	hsa:58509,CACTIN,58509:up	http://amigo.geneontology.org/cgi-bin/amigo/term_details?term=GO:0045824
gastrulation with mouth forming second	Biological Process	GO:0001702	1	30	103	17517	0.00970873786407767	0.00171262202431923	0.1622769936	0.5776002	hsa:90,ACVR1,90:up	http://amigo.geneontology.org/cgi-bin/amigo/term_details?term=GO:0001702
cardiac muscle cell action potential involved in contraction	Biological Process	GO:0086002	1	30	103	17517	0.00970873786407767	0.00171262202431923	0.1622769936	0.5776002	hsa:9722,NOS1AP,9722:up	http://amigo.geneontology.org/cgi-bin/amigo/term_details?term=GO:0086002
central nervous system neuron axonogenesis	Biological Process	GO:0021955	1	30	103	17517	0.00970873786407767	0.00171262202431923	0.1622769936	0.5776002	hsa:2043,EPHA4,2043:up	http://amigo.geneontology.org/cgi-bin/amigo/term_details?term=GO:0021955
regulation of neuroblast proliferation	Biological Process	GO:1902692	1	30	103	17517	0.00970873786407767	0.00171262202431923	0.1622769936	0.5776002	hsa:3091,HIF1A,3091:up	http://amigo.geneontology.org/cgi-bin/amigo/term_details?term=GO:1902692
polysaccharide catabolic process	Biological Process	GO:0000272	1	30	103	17517	0.00970873786407767	0.00171262202431923	0.1622769936	0.5776002	hsa:1373,CPS1,1373:up	http://amigo.geneontology.org/cgi-bin/amigo/term_details?term=GO:0000272
acylglycerol catabolic process	Biological Process	GO:0046464	1	30	103	17517	0.00970873786407767	0.00171262202431923	0.1622769936	0.5776002	hsa:1373,CPS1,1373:up	http://amigo.geneontology.org/cgi-bin/amigo/term_details?term=GO:0046464
positive regulation of cation channel activity	Biological Process	GO:2001259	1	30	103	17517	0.00970873786407767	0.00171262202431923	0.1622769936	0.5776002	hsa:9722,NOS1AP,9722:up	http://amigo.geneontology.org/cgi-bin/amigo/term_details?term=GO:2001259
regulation of potassium ion transmembrane transporter activity	Biological Process	GO:1901016	1	30	103	17517	0.00970873786407767	0.00171262202431923	0.1622769936	0.5776002	hsa:9722,NOS1AP,9722:up	http://amigo.geneontology.org/cgi-bin/amigo/term_details?term=GO:1901016
neutral lipid catabolic process	Biological Process	GO:0046461	1	30	103	17517	0.00970873786407767	0.00171262202431923	0.1622769936	0.5776002	hsa:1373,CPS1,1373:up	http://amigo.geneontology.org/cgi-bin/amigo/term_details?term=GO:0046461
RNA phosphodiester bond hydrolysis, exonucleolytic	Biological Process	GO:0090503	1	30	103	17517	0.00970873786407767	0.00171262202431923	0.1622769936	0.5776002	hsa:79650,USB1,79650:up	http://amigo.geneontology.org/cgi-bin/amigo/term_details?term=GO:0090503
regulation of meiotic nuclear division	Biological Process	GO:0040020	1	30	103	17517	0.00970873786407767	0.00171262202431923	0.1622769936	0.5776002	hsa:339345,NANOS2,339345:up	http://amigo.geneontology.org/cgi-bin/amigo/term_details?term=GO:0040020
regeneration	Biological Process	GO:0031099	2	123	103	17517	0.0194174757281553	0.00702175029970885	0.1632816623	0.5786008	hsa:26019,UPF2,26019:up|hsa:2043,EPHA4,2043:up	http://amigo.geneontology.org/cgi-bin/amigo/term_details?term=GO:0031099
peptide metabolic process	Biological Process	GO:0006518	2	123	103	17517	0.0194174757281553	0.00702175029970885	0.1632816623	0.5786008	hsa:6892,TAPBP,6892:up|hsa:3029,HAGH,3029:down	http://amigo.geneontology.org/cgi-bin/amigo/term_details?term=GO:0006518
negative regulation of protein serine/threonine kinase activity	Biological Process	GO:0071901	2	124	103	17517	0.0194174757281553	0.00707883770051949	0.1653564135	0.5850885	hsa:5999,RGS4,5999:down|hsa:1850,DUSP8,1850:up	http://amigo.geneontology.org/cgi-bin/amigo/term_details?term=GO:0071901
cellular nitrogen compound metabolic process	Biological Process	GO:0034641	39	5764	103	17517	0.378640776699029	0.329051778272535	0.1660316790	0.5866127	hsa:6202,RPS8,6202:down|hsa:6187,RPS2,6187:down|hsa:90,ACVR1,90:up|hsa:4291,MLF1,4291:up|hsa:10978,CLP1,10978:up|hsa:54925,ZSCAN32,54925:up|hsa:9722,NOS1AP,9722:up|hsa:653619,PRAMEF15,653619:up|hsa:79650,USB1,79650:up|hsa:5886,RAD23A,5886:down|hsa:339559,ZFP69,339559:up|hsa:23263,MCF2L,23263:down|hsa:4293,MAP3K9,4293:down|hsa:6143,RPL19,6143:down|hsa:26019,UPF2,26019:up|hsa:79816,TLE6,79816:down|…	http://amigo.geneontology.org/cgi-bin/amigo/term_details?term=GO:0034641
regulation of cell cycle checkpoint	Biological Process	GO:1901976	1	31	103	17517	0.00970873786407767	0.00176970942512987	0.1672112573	0.5872495	hsa:10397,NDRG1,10397:up	http://amigo.geneontology.org/cgi-bin/amigo/term_details?term=GO:1901976
vascular endothelial growth factor production	Biological Process	GO:0010573	1	31	103	17517	0.00970873786407767	0.00176970942512987	0.1672112573	0.5872495	hsa:3091,HIF1A,3091:up	http://amigo.geneontology.org/cgi-bin/amigo/term_details?term=GO:0010573
regulation of nucleotide catabolic process	Biological Process	GO:0030811	1	31	103	17517	0.00970873786407767	0.00176970942512987	0.1672112573	0.5872495	hsa:3091,HIF1A,3091:up	http://amigo.geneontology.org/cgi-bin/amigo/term_details?term=GO:0030811
cardiac atrium development	Biological Process	GO:0003230	1	31	103	17517	0.00970873786407767	0.00176970942512987	0.1672112573	0.5872495	hsa:90,ACVR1,90:up	http://amigo.geneontology.org/cgi-bin/amigo/term_details?term=GO:0003230
ATP metabolic process	Biological Process	GO:0046034	2	125	103	17517	0.0194174757281553	0.00713592510133014	0.1674358867	0.5872495	hsa:4538,ND4,4538:down|hsa:4537,ND3,4537:up	http://amigo.geneontology.org/cgi-bin/amigo/term_details?term=GO:0046034
oxidoreduction coenzyme metabolic process	Biological Process	GO:0006733	2	126	103	17517	0.0194174757281553	0.00719301250214078	0.1695199564	0.5932587	hsa:2821,GPI,2821:up|hsa:3091,HIF1A,3091:up	http://amigo.geneontology.org/cgi-bin/amigo/term_details?term=GO:0006733
membrane repolarization	Biological Process	GO:0086009	1	32	103	17517	0.00970873786407767	0.00182679682594051	0.1721167383	0.5932587	hsa:9722,NOS1AP,9722:up	http://amigo.geneontology.org/cgi-bin/amigo/term_details?term=GO:0086009
glial cell migration	Biological Process	GO:0008347	1	32	103	17517	0.00970873786407767	0.00182679682594051	0.1721167383	0.5932587	hsa:2043,EPHA4,2043:up	http://amigo.geneontology.org/cgi-bin/amigo/term_details?term=GO:0008347
cellular response to fatty acid	Biological Process	GO:0071398	1	32	103	17517	0.00970873786407767	0.00182679682594051	0.1721167383	0.5932587	hsa:1373,CPS1,1373:up	http://amigo.geneontology.org/cgi-bin/amigo/term_details?term=GO:0071398
regulation of T cell apoptotic process	Biological Process	GO:0070232	1	32	103	17517	0.00970873786407767	0.00182679682594051	0.1721167383	0.5932587	hsa:3091,HIF1A,3091:up	http://amigo.geneontology.org/cgi-bin/amigo/term_details?term=GO:0070232
response to pain	Biological Process	GO:0048265	1	32	103	17517	0.00970873786407767	0.00182679682594051	0.1721167383	0.5932587	hsa:64856,VWA1,64856:up	http://amigo.geneontology.org/cgi-bin/amigo/term_details?term=GO:0048265
response to food	Biological Process	GO:0032094	1	32	103	17517	0.00970873786407767	0.00182679682594051	0.1721167383	0.5932587	hsa:1373,CPS1,1373:up	http://amigo.geneontology.org/cgi-bin/amigo/term_details?term=GO:0032094
establishment of protein localization to organelle	Biological Process	GO:0072594	5	501	103	17517	0.0485436893203883	0.0286007878061312	0.1726454269	0.5942272	hsa:6202,RPS8,6202:down|hsa:6143,RPL19,6143:down|hsa:6187,RPS2,6187:down|hsa:55023,PHIP,55023:up|hsa:6161,RPL32,6161:down	http://amigo.geneontology.org/cgi-bin/amigo/term_details?term=GO:0072594
biomineral tissue development	Biological Process	GO:0031214	2	128	103	17517	0.0194174757281553	0.00730718730376206	0.1737013897	0.5952995	hsa:90,ACVR1,90:up|hsa:3091,HIF1A,3091:up	http://amigo.geneontology.org/cgi-bin/amigo/term_details?term=GO:0031214
response to tumor necrosis factor	Biological Process	GO:0034612	2	129	103	17517	0.0194174757281553	0.0073642747045727	0.1757985087	0.5967755	hsa:58509,CACTIN,58509:up|hsa:51667,NUB1,51667:up	http://amigo.geneontology.org/cgi-bin/amigo/term_details?term=GO:0034612
response to glucocorticoid	Biological Process	GO:0051384	2	129	103	17517	0.0194174757281553	0.0073642747045727	0.1757985087	0.5967755	hsa:1373,CPS1,1373:up|hsa:90,ACVR1,90:up	http://amigo.geneontology.org/cgi-bin/amigo/term_details?term=GO:0051384
negative regulation of response to stimulus	Biological Process	GO:0048585	10	1215	103	17517	0.0970873786407767	0.0693611919849289	0.1766508719	0.5967755	hsa:5999,RGS4,5999:down|hsa:55841,WWC3,55841:up|hsa:55023,PHIP,55023:up|hsa:90,ACVR1,90:up|hsa:1850,DUSP8,1850:up|hsa:3091,HIF1A,3091:up|hsa:2043,EPHA4,2043:up|hsa:58509,CACTIN,58509:up|hsa:30011,SH3KBP1,30011:down|hsa:653619,PRAMEF15,653619:up	http://amigo.geneontology.org/cgi-bin/amigo/term_details?term=GO:0048585
positive regulation of bone mineralization	Biological Process	GO:0030501	1	33	103	17517	0.00970873786407767	0.00188388422675116	0.1769936028	0.5967755	hsa:90,ACVR1,90:up	http://amigo.geneontology.org/cgi-bin/amigo/term_details?term=GO:0030501
regulation of cellular carbohydrate catabolic process	Biological Process	GO:0043471	1	33	103	17517	0.00970873786407767	0.00188388422675116	0.1769936028	0.5967755	hsa:3091,HIF1A,3091:up	http://amigo.geneontology.org/cgi-bin/amigo/term_details?term=GO:0043471
Golgi to plasma membrane protein transport	Biological Process	GO:0043001	1	33	103	17517	0.00970873786407767	0.00188388422675116	0.1769936028	0.5967755	hsa:8548,BLZF1,8548:up	http://amigo.geneontology.org/cgi-bin/amigo/term_details?term=GO:0043001
regulation of carbohydrate catabolic process	Biological Process	GO:0043470	1	33	103	17517	0.00970873786407767	0.00188388422675116	0.1769936028	0.5967755	hsa:3091,HIF1A,3091:up	http://amigo.geneontology.org/cgi-bin/amigo/term_details?term=GO:0043470
negative regulation of cytokine-mediated signaling pathway	Biological Process	GO:0001960	1	33	103	17517	0.00970873786407767	0.00188388422675116	0.1769936028	0.5967755	hsa:58509,CACTIN,58509:up	http://amigo.geneontology.org/cgi-bin/amigo/term_details?term=GO:0001960
negative regulation of intracellular signal transduction	Biological Process	GO:1902532	4	373	103	17517	0.0388349514563107	0.0212936005023691	0.1771172024	0.5967755	hsa:5999,RGS4,5999:down|hsa:55841,WWC3,55841:up|hsa:1850,DUSP8,1850:up|hsa:3091,HIF1A,3091:up	http://amigo.geneontology.org/cgi-bin/amigo/term_details?term=GO:1902532
digestive tract development	Biological Process	GO:0048565	2	130	103	17517	0.0194174757281553	0.00742136210538334	0.1778997349	0.5968972	hsa:1373,CPS1,1373:up|hsa:3091,HIF1A,3091:up	http://amigo.geneontology.org/cgi-bin/amigo/term_details?term=GO:0048565
transition metal ion homeostasis	Biological Process	GO:0055076	2	130	103	17517	0.0194174757281553	0.00742136210538334	0.1778997349	0.5968972	hsa:2495,FTH1,2495:down|hsa:3091,HIF1A,3091:up	http://amigo.geneontology.org/cgi-bin/amigo/term_details?term=GO:0055076
positive regulation of cellular catabolic process	Biological Process	GO:0031331	3	248	103	17517	0.029126213592233	0.014157675401039	0.1793735118	0.6010015	hsa:339345,NANOS2,339345:up|hsa:3091,HIF1A,3091:up|hsa:51667,NUB1,51667:up	http://amigo.geneontology.org/cgi-bin/amigo/term_details?term=GO:0031331
single-organism behavior	Biological Process	GO:0044708	4	376	103	17517	0.0388349514563107	0.0214648627048011	0.1806081189	0.6017090	hsa:64856,VWA1,64856:up|hsa:2821,GPI,2821:up|hsa:3091,HIF1A,3091:up|hsa:2043,EPHA4,2043:up	http://amigo.geneontology.org/cgi-bin/amigo/term_details?term=GO:0044708
cell migration	Biological Process	GO:0016477	9	1075	103	17517	0.087378640776699	0.0613689558714392	0.1808729680	0.6017090	hsa:154810,AMOTL1,154810:up|hsa:90,ACVR1,90:up|hsa:3091,HIF1A,3091:up|hsa:752,FMNL1,752:down|hsa:23473,CAPN7,23473:up|hsa:2043,EPHA4,2043:up|hsa:30011,SH3KBP1,30011:down|hsa:56288,PARD3,56288:up|hsa:199953,TMEM201,199953:down	http://amigo.geneontology.org/cgi-bin/amigo/term_details?term=GO:0016477
neuron projection regeneration	Biological Process	GO:0031102	1	34	103	17517	0.00970873786407767	0.0019409716275618	0.1818420161	0.6017090	hsa:2043,EPHA4,2043:up	http://amigo.geneontology.org/cgi-bin/amigo/term_details?term=GO:0031102
retrograde vesicle-mediated transport, Golgi to ER	Biological Process	GO:0006890	1	34	103	17517	0.00970873786407767	0.0019409716275618	0.1818420161	0.6017090	hsa:6892,TAPBP,6892:up	http://amigo.geneontology.org/cgi-bin/amigo/term_details?term=GO:0006890
mRNA polyadenylation	Biological Process	GO:0006378	1	34	103	17517	0.00970873786407767	0.0019409716275618	0.1818420161	0.6017090	hsa:10978,CLP1,10978:up	http://amigo.geneontology.org/cgi-bin/amigo/term_details?term=GO:0006378
maturation of SSU-rRNA	Biological Process	GO:0030490	1	34	103	17517	0.00970873786407767	0.0019409716275618	0.1818420161	0.6017090	hsa:6202,RPS8,6202:down	http://amigo.geneontology.org/cgi-bin/amigo/term_details?term=GO:0030490
regulation of interferon-beta production	Biological Process	GO:0032648	1	34	103	17517	0.00970873786407767	0.0019409716275618	0.1818420161	0.6017090	hsa:58509,CACTIN,58509:up	http://amigo.geneontology.org/cgi-bin/amigo/term_details?term=GO:0032648
ketone biosynthetic process	Biological Process	GO:0042181	1	34	103	17517	0.00970873786407767	0.0019409716275618	0.1818420161	0.6017090	hsa:2821,GPI,2821:up	http://amigo.geneontology.org/cgi-bin/amigo/term_details?term=GO:0042181
neuron recognition	Biological Process	GO:0008038	1	34	103	17517	0.00970873786407767	0.0019409716275618	0.1818420161	0.6017090	hsa:2043,EPHA4,2043:up	http://amigo.geneontology.org/cgi-bin/amigo/term_details?term=GO:0008038
negative regulation of neuron apoptotic process	Biological Process	GO:0043524	2	132	103	17517	0.0194174757281553	0.00753553690700462	0.1821140336	0.6017790	hsa:2821,GPI,2821:up|hsa:3091,HIF1A,3091:up	http://amigo.geneontology.org/cgi-bin/amigo/term_details?term=GO:0043524
negative regulation of signaling	Biological Process	GO:0023057	9	1079	103	17517	0.087378640776699	0.0615973054746817	0.1835812317	0.6057928	hsa:5999,RGS4,5999:down|hsa:55841,WWC3,55841:up|hsa:55023,PHIP,55023:up|hsa:90,ACVR1,90:up|hsa:1850,DUSP8,1850:up|hsa:3091,HIF1A,3091:up|hsa:58509,CACTIN,58509:up|hsa:30011,SH3KBP1,30011:down|hsa:653619,PRAMEF15,653619:up	http://amigo.geneontology.org/cgi-bin/amigo/term_details?term=GO:0023057
regulation of proteasomal ubiquitin-dependent protein catabolic process	Biological Process	GO:0032434	2	133	103	17517	0.0194174757281553	0.00759262430781527	0.1842268715	0.6062555	hsa:51667,NUB1,51667:up|hsa:5886,RAD23A,5886:down	http://amigo.geneontology.org/cgi-bin/amigo/term_details?term=GO:0032434
negative regulation of MAPK cascade	Biological Process	GO:0043409	2	133	103	17517	0.0194174757281553	0.00759262430781527	0.1842268715	0.6062555	hsa:5999,RGS4,5999:down|hsa:1850,DUSP8,1850:up	http://amigo.geneontology.org/cgi-bin/amigo/term_details?term=GO:0043409
response to hypoxia	Biological Process	GO:0001666	3	252	103	17517	0.029126213592233	0.0143860250042816	0.1852484591	0.6076017	hsa:3091,HIF1A,3091:up|hsa:10397,NDRG1,10397:up|hsa:64344,HIF3A,64344:up	http://amigo.geneontology.org/cgi-bin/amigo/term_details?term=GO:0001666
regulation of erythrocyte differentiation	Biological Process	GO:0045646	1	35	103	17517	0.00970873786407767	0.00199805902837244	0.1866621427	0.6076017	hsa:3091,HIF1A,3091:up	http://amigo.geneontology.org/cgi-bin/amigo/term_details?term=GO:0045646
negative regulation of tumor necrosis factor production	Biological Process	GO:0032720	1	35	103	17517	0.00970873786407767	0.00199805902837244	0.1866621427	0.6076017	hsa:58509,CACTIN,58509:up	http://amigo.geneontology.org/cgi-bin/amigo/term_details?term=GO:0032720
adult walking behavior	Biological Process	GO:0007628	1	35	103	17517	0.00970873786407767	0.00199805902837244	0.1866621427	0.6076017	hsa:2043,EPHA4,2043:up	http://amigo.geneontology.org/cgi-bin/amigo/term_details?term=GO:0007628
regulation of regulated secretory pathway	Biological Process	GO:1903305	1	35	103	17517	0.00970873786407767	0.00199805902837244	0.1866621427	0.6076017	hsa:5864,RAB3A,5864:down	http://amigo.geneontology.org/cgi-bin/amigo/term_details?term=GO:1903305
negative regulation of cell communication	Biological Process	GO:0010648	9	1085	103	17517	0.087378640776699	0.0619398298795456	0.1876783594	0.6100818	hsa:5999,RGS4,5999:down|hsa:55841,WWC3,55841:up|hsa:55023,PHIP,55023:up|hsa:90,ACVR1,90:up|hsa:1850,DUSP8,1850:up|hsa:3091,HIF1A,3091:up|hsa:58509,CACTIN,58509:up|hsa:30011,SH3KBP1,30011:down|hsa:653619,PRAMEF15,653619:up	http://amigo.geneontology.org/cgi-bin/amigo/term_details?term=GO:0010648
negative regulation of apoptotic process	Biological Process	GO:0043066	7	797	103	17517	0.0679611650485437	0.0454986584460809	0.1887772036	0.6107693	hsa:10553,HTATIP2,10553:down|hsa:55023,PHIP,55023:up|hsa:2821,GPI,2821:up|hsa:90,ACVR1,90:up|hsa:3091,HIF1A,3091:up|hsa:653619,PRAMEF15,653619:up|hsa:2274,FHL2,2274:up	http://amigo.geneontology.org/cgi-bin/amigo/term_details?term=GO:0043066
response to decreased oxygen levels	Biological Process	GO:0036293	3	256	103	17517	0.029126213592233	0.0146143746075241	0.1911743738	0.6107693	hsa:3091,HIF1A,3091:up|hsa:10397,NDRG1,10397:up|hsa:64344,HIF3A,64344:up	http://amigo.geneontology.org/cgi-bin/amigo/term_details?term=GO:0036293
regulation of toll-like receptor signaling pathway	Biological Process	GO:0034121	1	36	103	17517	0.00970873786407767	0.00205514642918308	0.1914541458	0.6107693	hsa:58509,CACTIN,58509:up	http://amigo.geneontology.org/cgi-bin/amigo/term_details?term=GO:0034121
regulation of type I interferon-mediated signaling pathway	Biological Process	GO:0060338	1	36	103	17517	0.00970873786407767	0.00205514642918308	0.1914541458	0.6107693	hsa:58509,CACTIN,58509:up	http://amigo.geneontology.org/cgi-bin/amigo/term_details?term=GO:0060338
interferon-beta production	Biological Process	GO:0032608	1	36	103	17517	0.00970873786407767	0.00205514642918308	0.1914541458	0.6107693	hsa:58509,CACTIN,58509:up	http://amigo.geneontology.org/cgi-bin/amigo/term_details?term=GO:0032608
activation of JUN kinase activity	Biological Process	GO:0007257	1	36	103	17517	0.00970873786407767	0.00205514642918308	0.1914541458	0.6107693	hsa:4293,MAP3K9,4293:down	http://amigo.geneontology.org/cgi-bin/amigo/term_details?term=GO:0007257
insulin-like growth factor receptor signaling pathway	Biological Process	GO:0048009	1	36	103	17517	0.00970873786407767	0.00205514642918308	0.1914541458	0.6107693	hsa:55023,PHIP,55023:up	http://amigo.geneontology.org/cgi-bin/amigo/term_details?term=GO:0048009
dendritic spine organization	Biological Process	GO:0097061	1	36	103	17517	0.00970873786407767	0.00205514642918308	0.1914541458	0.6107693	hsa:2043,EPHA4,2043:up	http://amigo.geneontology.org/cgi-bin/amigo/term_details?term=GO:0097061
RNA polyadenylation	Biological Process	GO:0043631	1	36	103	17517	0.00970873786407767	0.00205514642918308	0.1914541458	0.6107693	hsa:10978,CLP1,10978:up	http://amigo.geneontology.org/cgi-bin/amigo/term_details?term=GO:0043631
positive regulation of biomineral tissue development	Biological Process	GO:0070169	1	36	103	17517	0.00970873786407767	0.00205514642918308	0.1914541458	0.6107693	hsa:90,ACVR1,90:up	http://amigo.geneontology.org/cgi-bin/amigo/term_details?term=GO:0070169
regulation of dendritic spine development	Biological Process	GO:0060998	1	36	103	17517	0.00970873786407767	0.00205514642918308	0.1914541458	0.6107693	hsa:2043,EPHA4,2043:up	http://amigo.geneontology.org/cgi-bin/amigo/term_details?term=GO:0060998
purine ribonucleoside triphosphate metabolic process	Biological Process	GO:0009205	2	137	103	17517	0.0194174757281553	0.00782097391105783	0.1927134645	0.6131560	hsa:4538,ND4,4538:down|hsa:4537,ND3,4537:up	http://amigo.geneontology.org/cgi-bin/amigo/term_details?term=GO:0009205
macromolecule catabolic process	Biological Process	GO:0009057	9	1096	103	17517	0.087378640776699	0.0625677912884626	0.1952960299	0.6153300	hsa:6202,RPS8,6202:down|hsa:6187,RPS2,6187:down|hsa:1373,CPS1,1373:up|hsa:339345,NANOS2,339345:up|hsa:6161,RPL32,6161:down|hsa:51667,NUB1,51667:up|hsa:6143,RPL19,6143:down|hsa:26019,UPF2,26019:up|hsa:5886,RAD23A,5886:down	http://amigo.geneontology.org/cgi-bin/amigo/term_details?term=GO:0009057
negative regulation of programmed cell death	Biological Process	GO:0043069	7	806	103	17517	0.0679611650485437	0.0460124450533767	0.1960815515	0.6153300	hsa:10553,HTATIP2,10553:down|hsa:55023,PHIP,55023:up|hsa:2821,GPI,2821:up|hsa:90,ACVR1,90:up|hsa:3091,HIF1A,3091:up|hsa:653619,PRAMEF15,653619:up|hsa:2274,FHL2,2274:up	http://amigo.geneontology.org/cgi-bin/amigo/term_details?term=GO:0043069
negative regulation of response to cytokine stimulus	Biological Process	GO:0060761	1	37	103	17517	0.00970873786407767	0.00211223382999372	0.1962181881	0.6153300	hsa:58509,CACTIN,58509:up	http://amigo.geneontology.org/cgi-bin/amigo/term_details?term=GO:0060761
regulation of insulin secretion involved in cellular response to glucose stimulus	Biological Process	GO:0061178	1	37	103	17517	0.00970873786407767	0.00211223382999372	0.1962181881	0.6153300	hsa:3091,HIF1A,3091:up	http://amigo.geneontology.org/cgi-bin/amigo/term_details?term=GO:0061178
regulation of meiotic cell cycle	Biological Process	GO:0051445	1	37	103	17517	0.00970873786407767	0.00211223382999372	0.1962181881	0.6153300	hsa:339345,NANOS2,339345:up	http://amigo.geneontology.org/cgi-bin/amigo/term_details?term=GO:0051445
negative regulation of tumor necrosis factor superfamily cytokine production	Biological Process	GO:1903556	1	37	103	17517	0.00970873786407767	0.00211223382999372	0.1962181881	0.6153300	hsa:58509,CACTIN,58509:up	http://amigo.geneontology.org/cgi-bin/amigo/term_details?term=GO:1903556
glutamate secretion	Biological Process	GO:0014047	1	37	103	17517	0.00970873786407767	0.00211223382999372	0.1962181881	0.6153300	hsa:5864,RAB3A,5864:down	http://amigo.geneontology.org/cgi-bin/amigo/term_details?term=GO:0014047
protein kinase C-activating G-protein coupled receptor signaling pathway	Biological Process	GO:0007205	1	37	103	17517	0.00970873786407767	0.00211223382999372	0.1962181881	0.6153300	hsa:56288,PARD3,56288:up	http://amigo.geneontology.org/cgi-bin/amigo/term_details?term=GO:0007205
regulation of nucleoside metabolic process	Biological Process	GO:0009118	1	37	103	17517	0.00970873786407767	0.00211223382999372	0.1962181881	0.6153300	hsa:3091,HIF1A,3091:up	http://amigo.geneontology.org/cgi-bin/amigo/term_details?term=GO:0009118
response to exogenous dsRNA	Biological Process	GO:0043330	1	37	103	17517	0.00970873786407767	0.00211223382999372	0.1962181881	0.6153300	hsa:115004,MB21D1,115004:down	http://amigo.geneontology.org/cgi-bin/amigo/term_details?term=GO:0043330
positive regulation of nitric oxide biosynthetic process	Biological Process	GO:0045429	1	37	103	17517	0.00970873786407767	0.00211223382999372	0.1962181881	0.6153300	hsa:9722,NOS1AP,9722:up	http://amigo.geneontology.org/cgi-bin/amigo/term_details?term=GO:0045429
cellular nitrogen compound biosynthetic process	Biological Process	GO:0044271	28	4062	103	17517	0.271844660194175	0.231889022092824	0.1969392526	0.6167849	hsa:6202,RPS8,6202:down|hsa:55841,WWC3,55841:up|hsa:6187,RPS2,6187:down|hsa:1373,CPS1,1373:up|hsa:55023,PHIP,55023:up|hsa:90,ACVR1,90:up|hsa:115004,MB21D1,115004:down|hsa:55279,ZNF654,55279:up|hsa:4291,MLF1,4291:up|hsa:10978,CLP1,10978:up|hsa:2274,FHL2,2274:up|hsa:10553,HTATIP2,10553:down|hsa:54925,ZSCAN32,54925:up|hsa:3029,HAGH,3029:down|hsa:58509,CACTIN,58509:up|hsa:9722,NOS1AP,9722:up|hsa:6536…	http://amigo.geneontology.org/cgi-bin/amigo/term_details?term=GO:0044271
cellular response to growth factor stimulus	Biological Process	GO:0071363	6	667	103	17517	0.058252427184466	0.0380772963406976	0.1990321493	0.6203511	hsa:1373,CPS1,1373:up|hsa:90,ACVR1,90:up|hsa:3091,HIF1A,3091:up|hsa:23263,MCF2L,23263:down|hsa:64857,PLEKHG2,64857:down|hsa:56288,PARD3,56288:up	http://amigo.geneontology.org/cgi-bin/amigo/term_details?term=GO:0071363
establishment or maintenance of cell polarity	Biological Process	GO:0007163	2	140	103	17517	0.0194174757281553	0.00799223611348975	0.1991122791	0.6203511	hsa:154810,AMOTL1,154810:up|hsa:56288,PARD3,56288:up	http://amigo.geneontology.org/cgi-bin/amigo/term_details?term=GO:0007163
sensory perception of sound	Biological Process	GO:0007605	2	140	103	17517	0.0194174757281553	0.00799223611348975	0.1991122791	0.6203511	hsa:153562,MARVELD2,153562:down|hsa:54084,TSPEAR,54084:up	http://amigo.geneontology.org/cgi-bin/amigo/term_details?term=GO:0007605
cellular response to glucagon stimulus	Biological Process	GO:0071377	1	38	103	17517	0.00970873786407767	0.00216932123080436	0.2009544310	0.6221893	hsa:1373,CPS1,1373:up	http://amigo.geneontology.org/cgi-bin/amigo/term_details?term=GO:0071377
response to corticosteroid	Biological Process	GO:0031960	2	141	103	17517	0.0194174757281553	0.00804932351430039	0.2012510856	0.6221893	hsa:1373,CPS1,1373:up|hsa:90,ACVR1,90:up	http://amigo.geneontology.org/cgi-bin/amigo/term_details?term=GO:0031960
digestive system development	Biological Process	GO:0055123	2	142	103	17517	0.0194174757281553	0.00810641091511104	0.2033926485	0.6221893	hsa:1373,CPS1,1373:up|hsa:3091,HIF1A,3091:up	http://amigo.geneontology.org/cgi-bin/amigo/term_details?term=GO:0055123
mesenchymal cell development	Biological Process	GO:0014031	2	142	103	17517	0.0194174757281553	0.00810641091511104	0.2033926485	0.6221893	hsa:90,ACVR1,90:up|hsa:3091,HIF1A,3091:up	http://amigo.geneontology.org/cgi-bin/amigo/term_details?term=GO:0014031
ribonucleoside triphosphate metabolic process	Biological Process	GO:0009199	2	143	103	17517	0.0194174757281553	0.00816349831592168	0.2055368627	0.6221893	hsa:4538,ND4,4538:down|hsa:4537,ND3,4537:up	http://amigo.geneontology.org/cgi-bin/amigo/term_details?term=GO:0009199
regulation of oxidative stress-induced cell death	Biological Process	GO:1903201	1	39	103	17517	0.00970873786407767	0.002226408631615	0.2056630353	0.6221893	hsa:3091,HIF1A,3091:up	http://amigo.geneontology.org/cgi-bin/amigo/term_details?term=GO:1903201
negative regulation of type I interferon production	Biological Process	GO:0032480	1	39	103	17517	0.00970873786407767	0.002226408631615	0.2056630353	0.6221893	hsa:58509,CACTIN,58509:up	http://amigo.geneontology.org/cgi-bin/amigo/term_details?term=GO:0032480
positive regulation of reactive oxygen species biosynthetic process	Biological Process	GO:1903428	1	39	103	17517	0.00970873786407767	0.002226408631615	0.2056630353	0.6221893	hsa:9722,NOS1AP,9722:up	http://amigo.geneontology.org/cgi-bin/amigo/term_details?term=GO:1903428
response to electrical stimulus	Biological Process	GO:0051602	1	39	103	17517	0.00970873786407767	0.002226408631615	0.2056630353	0.6221893	hsa:5864,RAB3A,5864:down	http://amigo.geneontology.org/cgi-bin/amigo/term_details?term=GO:0051602
patterning of blood vessels	Biological Process	GO:0001569	1	39	103	17517	0.00970873786407767	0.002226408631615	0.2056630353	0.6221893	hsa:90,ACVR1,90:up	http://amigo.geneontology.org/cgi-bin/amigo/term_details?term=GO:0001569
regulation of cofactor metabolic process	Biological Process	GO:0051193	1	39	103	17517	0.00970873786407767	0.002226408631615	0.2056630353	0.6221893	hsa:3091,HIF1A,3091:up	http://amigo.geneontology.org/cgi-bin/amigo/term_details?term=GO:0051193
cellular response to glucocorticoid stimulus	Biological Process	GO:0071385	1	39	103	17517	0.00970873786407767	0.002226408631615	0.2056630353	0.6221893	hsa:90,ACVR1,90:up	http://amigo.geneontology.org/cgi-bin/amigo/term_details?term=GO:0071385
glycerolipid catabolic process	Biological Process	GO:0046503	1	39	103	17517	0.00970873786407767	0.002226408631615	0.2056630353	0.6221893	hsa:1373,CPS1,1373:up	http://amigo.geneontology.org/cgi-bin/amigo/term_details?term=GO:0046503
regulation of coenzyme metabolic process	Biological Process	GO:0051196	1	39	103	17517	0.00970873786407767	0.002226408631615	0.2056630353	0.6221893	hsa:3091,HIF1A,3091:up	http://amigo.geneontology.org/cgi-bin/amigo/term_details?term=GO:0051196
posttranscriptional gene silencing by RNA	Biological Process	GO:0035194	1	39	103	17517	0.00970873786407767	0.002226408631615	0.2056630353	0.6221893	hsa:10978,CLP1,10978:up	http://amigo.geneontology.org/cgi-bin/amigo/term_details?term=GO:0035194
axon cargo transport	Biological Process	GO:0008088	1	39	103	17517	0.00970873786407767	0.002226408631615	0.2056630353	0.6221893	hsa:3091,HIF1A,3091:up	http://amigo.geneontology.org/cgi-bin/amigo/term_details?term=GO:0008088
termination of G-protein coupled receptor signaling pathway	Biological Process	GO:0038032	1	39	103	17517	0.00970873786407767	0.002226408631615	0.2056630353	0.6221893	hsa:5999,RGS4,5999:down	http://amigo.geneontology.org/cgi-bin/amigo/term_details?term=GO:0038032
activin receptor signaling pathway	Biological Process	GO:0032924	1	39	103	17517	0.00970873786407767	0.002226408631615	0.2056630353	0.6221893	hsa:90,ACVR1,90:up	http://amigo.geneontology.org/cgi-bin/amigo/term_details?term=GO:0032924
ncRNA metabolic process	Biological Process	GO:0034660	4	397	103	17517	0.0388349514563107	0.0226636981218245	0.2056674014	0.6221893	hsa:6202,RPS8,6202:down|hsa:152992,TRMT44,152992:up|hsa:79650,USB1,79650:up|hsa:10978,CLP1,10978:up	http://amigo.geneontology.org/cgi-bin/amigo/term_details?term=GO:0034660
placenta development	Biological Process	GO:0001890	2	144	103	17517	0.0194174757281553	0.00822058571673232	0.2076836243	0.6252982	hsa:3091,HIF1A,3091:up|hsa:2709,GJB5,2709:down	http://amigo.geneontology.org/cgi-bin/amigo/term_details?term=GO:0001890
tRNA metabolic process	Biological Process	GO:0006399	2	144	103	17517	0.0194174757281553	0.00822058571673232	0.2076836243	0.6252982	hsa:152992,TRMT44,152992:up|hsa:10978,CLP1,10978:up	http://amigo.geneontology.org/cgi-bin/amigo/term_details?term=GO:0006399
purine nucleoside triphosphate metabolic process	Biological Process	GO:0009144	2	145	103	17517	0.0194174757281553	0.00827767311754296	0.2098328305	0.6252982	hsa:4538,ND4,4538:down|hsa:4537,ND3,4537:up	http://amigo.geneontology.org/cgi-bin/amigo/term_details?term=GO:0009144
response to amine	Biological Process	GO:0014075	1	40	103	17517	0.00970873786407767	0.00228349603242564	0.2103441605	0.6252982	hsa:1373,CPS1,1373:up	http://amigo.geneontology.org/cgi-bin/amigo/term_details?term=GO:0014075
response to zinc ion	Biological Process	GO:0010043	1	40	103	17517	0.00970873786407767	0.00228349603242564	0.2103441605	0.6252982	hsa:1373,CPS1,1373:up	http://amigo.geneontology.org/cgi-bin/amigo/term_details?term=GO:0010043
trabecula morphogenesis	Biological Process	GO:0061383	1	40	103	17517	0.00970873786407767	0.00228349603242564	0.2103441605	0.6252982	hsa:2274,FHL2,2274:up	http://amigo.geneontology.org/cgi-bin/amigo/term_details?term=GO:0061383
positive regulation of mRNA metabolic process	Biological Process	GO:1903313	1	40	103	17517	0.00970873786407767	0.00228349603242564	0.2103441605	0.6252982	hsa:339345,NANOS2,339345:up	http://amigo.geneontology.org/cgi-bin/amigo/term_details?term=GO:1903313
morphogenesis of an epithelial sheet	Biological Process	GO:0002011	1	40	103	17517	0.00970873786407767	0.00228349603242564	0.2103441605	0.6252982	hsa:56288,PARD3,56288:up	http://amigo.geneontology.org/cgi-bin/amigo/term_details?term=GO:0002011
posttranscriptional gene silencing	Biological Process	GO:0016441	1	40	103	17517	0.00970873786407767	0.00228349603242564	0.2103441605	0.6252982	hsa:10978,CLP1,10978:up	http://amigo.geneontology.org/cgi-bin/amigo/term_details?term=GO:0016441
positive regulation of chemokine production	Biological Process	GO:0032722	1	40	103	17517	0.00970873786407767	0.00228349603242564	0.2103441605	0.6252982	hsa:3091,HIF1A,3091:up	http://amigo.geneontology.org/cgi-bin/amigo/term_details?term=GO:0032722
angiogenesis	Biological Process	GO:0001525	4	403	103	17517	0.0388349514563107	0.0230062225266884	0.2130113657	0.6320835	hsa:10553,HTATIP2,10553:down|hsa:2821,GPI,2821:up|hsa:90,ACVR1,90:up|hsa:3091,HIF1A,3091:up	http://amigo.geneontology.org/cgi-bin/amigo/term_details?term=GO:0001525
response to growth factor	Biological Process	GO:0070848	6	684	103	17517	0.058252427184466	0.0390477821544785	0.2147154476	0.6320835	hsa:1373,CPS1,1373:up|hsa:90,ACVR1,90:up|hsa:3091,HIF1A,3091:up|hsa:23263,MCF2L,23263:down|hsa:64857,PLEKHG2,64857:down|hsa:56288,PARD3,56288:up	http://amigo.geneontology.org/cgi-bin/amigo/term_details?term=GO:0070848
anion homeostasis	Biological Process	GO:0055081	1	41	103	17517	0.00970873786407767	0.00234058343323628	0.2149979656	0.6320835	hsa:1373,CPS1,1373:up	http://amigo.geneontology.org/cgi-bin/amigo/term_details?term=GO:0055081
regulation of cardiac muscle cell contraction	Biological Process	GO:0086004	1	41	103	17517	0.00970873786407767	0.00234058343323628	0.2149979656	0.6320835	hsa:9722,NOS1AP,9722:up	http://amigo.geneontology.org/cgi-bin/amigo/term_details?term=GO:0086004
lactation	Biological Process	GO:0007595	1	41	103	17517	0.00970873786407767	0.00234058343323628	0.2149979656	0.6320835	hsa:3091,HIF1A,3091:up	http://amigo.geneontology.org/cgi-bin/amigo/term_details?term=GO:0007595
cellular response to corticosteroid stimulus	Biological Process	GO:0071384	1	41	103	17517	0.00970873786407767	0.00234058343323628	0.2149979656	0.6320835	hsa:90,ACVR1,90:up	http://amigo.geneontology.org/cgi-bin/amigo/term_details?term=GO:0071384
response to growth hormone	Biological Process	GO:0060416	1	41	103	17517	0.00970873786407767	0.00234058343323628	0.2149979656	0.6320835	hsa:1373,CPS1,1373:up	http://amigo.geneontology.org/cgi-bin/amigo/term_details?term=GO:0060416
insulin secretion involved in cellular response to glucose stimulus	Biological Process	GO:0035773	1	41	103	17517	0.00970873786407767	0.00234058343323628	0.2149979656	0.6320835	hsa:3091,HIF1A,3091:up	http://amigo.geneontology.org/cgi-bin/amigo/term_details?term=GO:0035773
positive regulation of mitotic nuclear division	Biological Process	GO:0045840	1	41	103	17517	0.00970873786407767	0.00234058343323628	0.2149979656	0.6320835	hsa:55023,PHIP,55023:up	http://amigo.geneontology.org/cgi-bin/amigo/term_details?term=GO:0045840
response to oxygen levels	Biological Process	GO:0070482	3	272	103	17517	0.029126213592233	0.0155277730204944	0.2153365012	0.6323039	hsa:3091,HIF1A,3091:up|hsa:10397,NDRG1,10397:up|hsa:64344,HIF3A,64344:up	http://amigo.geneontology.org/cgi-bin/amigo/term_details?term=GO:0070482
regulation of JNK cascade	Biological Process	GO:0046328	2	149	103	17517	0.0194174757281553	0.00850602272078552	0.2184520834	0.6332686	hsa:2043,EPHA4,2043:up|hsa:4293,MAP3K9,4293:down	http://amigo.geneontology.org/cgi-bin/amigo/term_details?term=GO:0046328
nucleobase-containing compound metabolic process	Biological Process	GO:0006139	35	5261	103	17517	0.339805825242718	0.300336815664783	0.2193785261	0.6332686	hsa:6202,RPS8,6202:down|hsa:6187,RPS2,6187:down|hsa:90,ACVR1,90:up|hsa:4291,MLF1,4291:up|hsa:10978,CLP1,10978:up|hsa:54925,ZSCAN32,54925:up|hsa:653619,PRAMEF15,653619:up|hsa:79650,USB1,79650:up|hsa:5886,RAD23A,5886:down|hsa:339559,ZFP69,339559:up|hsa:23263,MCF2L,23263:down|hsa:4293,MAP3K9,4293:down|hsa:6143,RPL19,6143:down|hsa:26019,UPF2,26019:up|hsa:79816,TLE6,79816:down|hsa:55841,WWC3,55841:up|…	http://amigo.geneontology.org/cgi-bin/amigo/term_details?term=GO:0006139
vesicle docking involved in exocytosis	Biological Process	GO:0006904	1	42	103	17517	0.00970873786407767	0.00239767083404693	0.2196246084	0.6332686	hsa:5864,RAB3A,5864:down	http://amigo.geneontology.org/cgi-bin/amigo/term_details?term=GO:0006904
termination of signal transduction	Biological Process	GO:0023021	1	42	103	17517	0.00970873786407767	0.00239767083404693	0.2196246084	0.6332686	hsa:5999,RGS4,5999:down	http://amigo.geneontology.org/cgi-bin/amigo/term_details?term=GO:0023021
cardiac muscle cell action potential	Biological Process	GO:0086001	1	42	103	17517	0.00970873786407767	0.00239767083404693	0.2196246084	0.6332686	hsa:9722,NOS1AP,9722:up	http://amigo.geneontology.org/cgi-bin/amigo/term_details?term=GO:0086001
negative regulation of leukocyte apoptotic process	Biological Process	GO:2000107	1	42	103	17517	0.00970873786407767	0.00239767083404693	0.2196246084	0.6332686	hsa:3091,HIF1A,3091:up	http://amigo.geneontology.org/cgi-bin/amigo/term_details?term=GO:2000107
regulation of vasodilation	Biological Process	GO:0042312	1	42	103	17517	0.00970873786407767	0.00239767083404693	0.2196246084	0.6332686	hsa:1373,CPS1,1373:up	http://amigo.geneontology.org/cgi-bin/amigo/term_details?term=GO:0042312
cardiac muscle cell contraction	Biological Process	GO:0086003	1	42	103	17517	0.00970873786407767	0.00239767083404693	0.2196246084	0.6332686	hsa:9722,NOS1AP,9722:up	http://amigo.geneontology.org/cgi-bin/amigo/term_details?term=GO:0086003
positive regulation of neural precursor cell proliferation	Biological Process	GO:2000179	1	42	103	17517	0.00970873786407767	0.00239767083404693	0.2196246084	0.6332686	hsa:3091,HIF1A,3091:up	http://amigo.geneontology.org/cgi-bin/amigo/term_details?term=GO:2000179
positive regulation of dendrite development	Biological Process	GO:1900006	1	42	103	17517	0.00970873786407767	0.00239767083404693	0.2196246084	0.6332686	hsa:2043,EPHA4,2043:up	http://amigo.geneontology.org/cgi-bin/amigo/term_details?term=GO:1900006
cellular amide metabolic process	Biological Process	GO:0043603	3	275	103	17517	0.029126213592233	0.0156990352229263	0.2199399670	0.6334165	hsa:6892,TAPBP,6892:up|hsa:1373,CPS1,1373:up|hsa:3029,HAGH,3029:down	http://amigo.geneontology.org/cgi-bin/amigo/term_details?term=GO:0043603
ribonucleoprotein complex assembly	Biological Process	GO:0022618	2	150	103	17517	0.0194174757281553	0.00856311012159616	0.2206120086	0.6345902	hsa:51388,NIP7,51388:up|hsa:10978,CLP1,10978:up	http://amigo.geneontology.org/cgi-bin/amigo/term_details?term=GO:0022618
stem cell development	Biological Process	GO:0048864	3	276	103	17517	0.029126213592233	0.0157561226237369	0.2214790670	0.6363213	hsa:90,ACVR1,90:up|hsa:339345,NANOS2,339345:up|hsa:3091,HIF1A,3091:up	http://amigo.geneontology.org/cgi-bin/amigo/term_details?term=GO:0048864
sulfur amino acid metabolic process	Biological Process	GO:0000096	1	43	103	17517	0.00970873786407767	0.00245475823485757	0.2242242459	0.6365846	hsa:1373,CPS1,1373:up	http://amigo.geneontology.org/cgi-bin/amigo/term_details?term=GO:0000096
negative regulation of epidermal growth factor receptor signaling pathway	Biological Process	GO:0042059	1	43	103	17517	0.00970873786407767	0.00245475823485757	0.2242242459	0.6365846	hsa:30011,SH3KBP1,30011:down	http://amigo.geneontology.org/cgi-bin/amigo/term_details?term=GO:0042059
regulation of skeletal muscle tissue development	Biological Process	GO:0048641	1	43	103	17517	0.00970873786407767	0.00245475823485757	0.2242242459	0.6365846	hsa:90,ACVR1,90:up	http://amigo.geneontology.org/cgi-bin/amigo/term_details?term=GO:0048641
intrinsic apoptotic signaling pathway in response to DNA damage by p53 class mediator	Biological Process	GO:0042771	1	43	103	17517	0.00970873786407767	0.00245475823485757	0.2242242459	0.6365846	hsa:79073,TMEM109,79073:down	http://amigo.geneontology.org/cgi-bin/amigo/term_details?term=GO:0042771
regulation of ATPase activity	Biological Process	GO:0043462	1	43	103	17517	0.00970873786407767	0.00245475823485757	0.2242242459	0.6365846	hsa:5864,RAB3A,5864:down	http://amigo.geneontology.org/cgi-bin/amigo/term_details?term=GO:0043462
dendritic spine development	Biological Process	GO:0060996	1	43	103	17517	0.00970873786407767	0.00245475823485757	0.2242242459	0.6365846	hsa:2043,EPHA4,2043:up	http://amigo.geneontology.org/cgi-bin/amigo/term_details?term=GO:0060996
cellular response to cAMP	Biological Process	GO:0071320	1	43	103	17517	0.00970873786407767	0.00245475823485757	0.2242242459	0.6365846	hsa:1373,CPS1,1373:up	http://amigo.geneontology.org/cgi-bin/amigo/term_details?term=GO:0071320
retinoic acid receptor signaling pathway	Biological Process	GO:0048384	1	43	103	17517	0.00970873786407767	0.00245475823485757	0.2242242459	0.6365846	hsa:653619,PRAMEF15,653619:up	http://amigo.geneontology.org/cgi-bin/amigo/term_details?term=GO:0048384
hematopoietic progenitor cell differentiation	Biological Process	GO:0002244	2	152	103	17517	0.0194174757281553	0.00867728492321745	0.2249373152	0.6378542	hsa:79819,WDR78,79819:up|hsa:4291,MLF1,4291:up	http://amigo.geneontology.org/cgi-bin/amigo/term_details?term=GO:0002244
regulation of cell morphogenesis	Biological Process	GO:0022604	4	415	103	17517	0.0388349514563107	0.0236912713364161	0.2279169607	0.6410454	hsa:55023,PHIP,55023:up|hsa:752,FMNL1,752:down|hsa:30011,SH3KBP1,30011:down|hsa:2043,EPHA4,2043:up	http://amigo.geneontology.org/cgi-bin/amigo/term_details?term=GO:0022604
regulation of actin filament-based movement	Biological Process	GO:1903115	1	44	103	17517	0.00970873786407767	0.00251184563566821	0.2287970342	0.6410454	hsa:9722,NOS1AP,9722:up	http://amigo.geneontology.org/cgi-bin/amigo/term_details?term=GO:1903115
glutathione metabolic process	Biological Process	GO:0006749	1	44	103	17517	0.00970873786407767	0.00251184563566821	0.2287970342	0.6410454	hsa:3029,HAGH,3029:down	http://amigo.geneontology.org/cgi-bin/amigo/term_details?term=GO:0006749
negative regulation of ERBB signaling pathway	Biological Process	GO:1901185	1	44	103	17517	0.00970873786407767	0.00251184563566821	0.2287970342	0.6410454	hsa:30011,SH3KBP1,30011:down	http://amigo.geneontology.org/cgi-bin/amigo/term_details?term=GO:1901185
Golgi to plasma membrane transport	Biological Process	GO:0006893	1	44	103	17517	0.00970873786407767	0.00251184563566821	0.2287970342	0.6410454	hsa:8548,BLZF1,8548:up	http://amigo.geneontology.org/cgi-bin/amigo/term_details?term=GO:0006893
response to activity	Biological Process	GO:0014823	1	44	103	17517	0.00970873786407767	0.00251184563566821	0.2287970342	0.6410454	hsa:3091,HIF1A,3091:up	http://amigo.geneontology.org/cgi-bin/amigo/term_details?term=GO:0014823
response to gamma radiation	Biological Process	GO:0010332	1	44	103	17517	0.00970873786407767	0.00251184563566821	0.2287970342	0.6410454	hsa:79073,TMEM109,79073:down	http://amigo.geneontology.org/cgi-bin/amigo/term_details?term=GO:0010332
mesenchymal cell differentiation	Biological Process	GO:0048762	2	155	103	17517	0.0194174757281553	0.00884854712564937	0.2314375018	0.6448324	hsa:90,ACVR1,90:up|hsa:3091,HIF1A,3091:up	http://amigo.geneontology.org/cgi-bin/amigo/term_details?term=GO:0048762
regulation of blood vessel endothelial cell migration	Biological Process	GO:0043535	1	45	103	17517	0.00970873786407767	0.00256893303647885	0.2333431285	0.6448324	hsa:154810,AMOTL1,154810:up	http://amigo.geneontology.org/cgi-bin/amigo/term_details?term=GO:0043535
intrinsic apoptotic signaling pathway in response to oxidative stress	Biological Process	GO:0008631	1	45	103	17517	0.00970873786407767	0.00256893303647885	0.2333431285	0.6448324	hsa:3091,HIF1A,3091:up	http://amigo.geneontology.org/cgi-bin/amigo/term_details?term=GO:0008631
regulation of cellular response to oxidative stress	Biological Process	GO:1900407	1	45	103	17517	0.00970873786407767	0.00256893303647885	0.2333431285	0.6448324	hsa:3091,HIF1A,3091:up	http://amigo.geneontology.org/cgi-bin/amigo/term_details?term=GO:1900407
positive regulation of pathway-restricted SMAD protein phosphorylation	Biological Process	GO:0010862	1	45	103	17517	0.00970873786407767	0.00256893303647885	0.2333431285	0.6448324	hsa:90,ACVR1,90:up	http://amigo.geneontology.org/cgi-bin/amigo/term_details?term=GO:0010862
endothelial cell development	Biological Process	GO:0001885	1	45	103	17517	0.00970873786407767	0.00256893303647885	0.2333431285	0.6448324	hsa:153562,MARVELD2,153562:down	http://amigo.geneontology.org/cgi-bin/amigo/term_details?term=GO:0001885
ribosomal small subunit biogenesis	Biological Process	GO:0042274	1	45	103	17517	0.00970873786407767	0.00256893303647885	0.2333431285	0.6448324	hsa:6202,RPS8,6202:down	http://amigo.geneontology.org/cgi-bin/amigo/term_details?term=GO:0042274
negative regulation of neuron death	Biological Process	GO:1901215	2	156	103	17517	0.0194174757281553	0.00890563452646001	0.2336071211	0.6448324	hsa:2821,GPI,2821:up|hsa:3091,HIF1A,3091:up	http://amigo.geneontology.org/cgi-bin/amigo/term_details?term=GO:1901215
single-organism cellular localization	Biological Process	GO:1902580	8	999	103	17517	0.0776699029126214	0.0570303134098305	0.2338491914	0.6448324	hsa:6202,RPS8,6202:down|hsa:6187,RPS2,6187:down|hsa:55023,PHIP,55023:up|hsa:6161,RPL32,6161:down|hsa:5864,RAB3A,5864:down|hsa:6143,RPL19,6143:down|hsa:56288,PARD3,56288:up|hsa:8548,BLZF1,8548:up	http://amigo.geneontology.org/cgi-bin/amigo/term_details?term=GO:1902580
cell motility	Biological Process	GO:0048870	9	1151	103	17517	0.087378640776699	0.0657075983330479	0.2353056342	0.6466188	hsa:154810,AMOTL1,154810:up|hsa:90,ACVR1,90:up|hsa:3091,HIF1A,3091:up|hsa:752,FMNL1,752:down|hsa:23473,CAPN7,23473:up|hsa:2043,EPHA4,2043:up|hsa:30011,SH3KBP1,30011:down|hsa:56288,PARD3,56288:up|hsa:199953,TMEM201,199953:down	http://amigo.geneontology.org/cgi-bin/amigo/term_details?term=GO:0048870
localization of cell	Biological Process	GO:0051674	9	1151	103	17517	0.087378640776699	0.0657075983330479	0.2353056342	0.6466188	hsa:154810,AMOTL1,154810:up|hsa:90,ACVR1,90:up|hsa:3091,HIF1A,3091:up|hsa:752,FMNL1,752:down|hsa:23473,CAPN7,23473:up|hsa:2043,EPHA4,2043:up|hsa:30011,SH3KBP1,30011:down|hsa:56288,PARD3,56288:up|hsa:199953,TMEM201,199953:down	http://amigo.geneontology.org/cgi-bin/amigo/term_details?term=GO:0051674
regulation of nuclear division	Biological Process	GO:0051783	2	157	103	17517	0.0194174757281553	0.00896272192727065	0.2357780345	0.6471756	hsa:55023,PHIP,55023:up|hsa:339345,NANOS2,339345:up	http://amigo.geneontology.org/cgi-bin/amigo/term_details?term=GO:0051783
mast cell activation	Biological Process	GO:0045576	1	46	103	17517	0.00970873786407767	0.00262602043728949	0.2378626831	0.6499232	hsa:10397,NDRG1,10397:up	http://amigo.geneontology.org/cgi-bin/amigo/term_details?term=GO:0045576
regulation of potassium ion transmembrane transport	Biological Process	GO:1901379	1	46	103	17517	0.00970873786407767	0.00262602043728949	0.2378626831	0.6499232	hsa:9722,NOS1AP,9722:up	http://amigo.geneontology.org/cgi-bin/amigo/term_details?term=GO:1901379
lipopolysaccharide-mediated signaling pathway	Biological Process	GO:0031663	1	46	103	17517	0.00970873786407767	0.00262602043728949	0.2378626831	0.6499232	hsa:58509,CACTIN,58509:up	http://amigo.geneontology.org/cgi-bin/amigo/term_details?term=GO:0031663
ribonucleoprotein complex subunit organization	Biological Process	GO:0071826	2	159	103	17517	0.0194174757281553	0.00907689672889193	0.2401233876	0.6546091	hsa:51388,NIP7,51388:up|hsa:10978,CLP1,10978:up	http://amigo.geneontology.org/cgi-bin/amigo/term_details?term=GO:0071826
termination of RNA polymerase II transcription	Biological Process	GO:0006369	1	47	103	17517	0.00970873786407767	0.00268310783810013	0.2423558514	0.6569624	hsa:10978,CLP1,10978:up	http://amigo.geneontology.org/cgi-bin/amigo/term_details?term=GO:0006369
regulation of neurotransmitter secretion	Biological Process	GO:0046928	1	47	103	17517	0.00970873786407767	0.00268310783810013	0.2423558514	0.6569624	hsa:5864,RAB3A,5864:down	http://amigo.geneontology.org/cgi-bin/amigo/term_details?term=GO:0046928
T cell apoptotic process	Biological Process	GO:0070231	1	47	103	17517	0.00970873786407767	0.00268310783810013	0.2423558514	0.6569624	hsa:3091,HIF1A,3091:up	http://amigo.geneontology.org/cgi-bin/amigo/term_details?term=GO:0070231
smooth muscle cell differentiation	Biological Process	GO:0051145	1	47	103	17517	0.00970873786407767	0.00268310783810013	0.2423558514	0.6569624	hsa:90,ACVR1,90:up	http://amigo.geneontology.org/cgi-bin/amigo/term_details?term=GO:0051145
labyrinthine layer development	Biological Process	GO:0060711	1	47	103	17517	0.00970873786407767	0.00268310783810013	0.2423558514	0.6569624	hsa:2709,GJB5,2709:down	http://amigo.geneontology.org/cgi-bin/amigo/term_details?term=GO:0060711
purine ribonucleotide metabolic process	Biological Process	GO:0009150	4	427	103	17517	0.0388349514563107	0.0243763201461437	0.2430842292	0.6580164	hsa:2821,GPI,2821:up|hsa:4538,ND4,4538:down|hsa:3091,HIF1A,3091:up|hsa:4537,ND3,4537:up	http://amigo.geneontology.org/cgi-bin/amigo/term_details?term=GO:0009150
regulation of protein serine/threonine kinase activity	Biological Process	GO:0071900	4	428	103	17517	0.0388349514563107	0.0244334075469544	0.2443589110	0.6586517	hsa:5999,RGS4,5999:down|hsa:1850,DUSP8,1850:up|hsa:2043,EPHA4,2043:up|hsa:4293,MAP3K9,4293:down	http://amigo.geneontology.org/cgi-bin/amigo/term_details?term=GO:0071900
regulation of extrinsic apoptotic signaling pathway	Biological Process	GO:2001236	2	161	103	17517	0.0194174757281553	0.00919107153051322	0.2444728589	0.6586517	hsa:55023,PHIP,55023:up|hsa:90,ACVR1,90:up	http://amigo.geneontology.org/cgi-bin/amigo/term_details?term=GO:2001236
nucleic acid metabolic process	Biological Process	GO:0090304	31	4672	103	17517	0.300970873786408	0.266712336587315	0.2463870369	0.6586517	hsa:6202,RPS8,6202:down|hsa:55841,WWC3,55841:up|hsa:6187,RPS2,6187:down|hsa:55023,PHIP,55023:up|hsa:90,ACVR1,90:up|hsa:55279,ZNF654,55279:up|hsa:4291,MLF1,4291:up|hsa:10978,CLP1,10978:up|hsa:2274,FHL2,2274:up|hsa:10553,HTATIP2,10553:down|hsa:54925,ZSCAN32,54925:up|hsa:152992,TRMT44,152992:up|hsa:56160,NDNL2,56160:up|hsa:58509,CACTIN,58509:up|hsa:653619,PRAMEF15,653619:up|hsa:79650,USB1,79650:up|h…	http://amigo.geneontology.org/cgi-bin/amigo/term_details?term=GO:0090304
visual learning	Biological Process	GO:0008542	1	48	103	17517	0.00970873786407767	0.00274019523891077	0.2468227860	0.6586517	hsa:3091,HIF1A,3091:up	http://amigo.geneontology.org/cgi-bin/amigo/term_details?term=GO:0008542
cellular response to ionizing radiation	Biological Process	GO:0071479	1	48	103	17517	0.00970873786407767	0.00274019523891077	0.2468227860	0.6586517	hsa:79073,TMEM109,79073:down	http://amigo.geneontology.org/cgi-bin/amigo/term_details?term=GO:0071479
regulation of response to oxidative stress	Biological Process	GO:1902882	1	48	103	17517	0.00970873786407767	0.00274019523891077	0.2468227860	0.6586517	hsa:3091,HIF1A,3091:up	http://amigo.geneontology.org/cgi-bin/amigo/term_details?term=GO:1902882
regulation of nitric oxide biosynthetic process	Biological Process	GO:0045428	1	48	103	17517	0.00970873786407767	0.00274019523891077	0.2468227860	0.6586517	hsa:9722,NOS1AP,9722:up	http://amigo.geneontology.org/cgi-bin/amigo/term_details?term=GO:0045428
regulation of neuronal synaptic plasticity	Biological Process	GO:0048168	1	48	103	17517	0.00970873786407767	0.00274019523891077	0.2468227860	0.6586517	hsa:5864,RAB3A,5864:down	http://amigo.geneontology.org/cgi-bin/amigo/term_details?term=GO:0048168
viral process	Biological Process	GO:0016032	6	719	103	17517	0.058252427184466	0.0410458411828509	0.2482850288	0.6610830	hsa:6202,RPS8,6202:down|hsa:10553,HTATIP2,10553:down|hsa:6143,RPL19,6143:down|hsa:6187,RPS2,6187:down|hsa:6161,RPL32,6161:down|hsa:5886,RAD23A,5886:down	http://amigo.geneontology.org/cgi-bin/amigo/term_details?term=GO:0016032
signal transduction by p53 class mediator	Biological Process	GO:0072331	2	164	103	17517	0.0194174757281553	0.00936233373294514	0.2510032903	0.6631259	hsa:10397,NDRG1,10397:up|hsa:79073,TMEM109,79073:down	http://amigo.geneontology.org/cgi-bin/amigo/term_details?term=GO:0072331
cerebellar cortex development	Biological Process	GO:0021695	1	49	103	17517	0.00970873786407767	0.00279728263972141	0.2512636385	0.6631259	hsa:10978,CLP1,10978:up	http://amigo.geneontology.org/cgi-bin/amigo/term_details?term=GO:0021695
response to glucagon	Biological Process	GO:0033762	1	49	103	17517	0.00970873786407767	0.00279728263972141	0.2512636385	0.6631259	hsa:1373,CPS1,1373:up	http://amigo.geneontology.org/cgi-bin/amigo/term_details?term=GO:0033762
regulation of TOR signaling	Biological Process	GO:0032006	1	49	103	17517	0.00970873786407767	0.00279728263972141	0.2512636385	0.6631259	hsa:3091,HIF1A,3091:up	http://amigo.geneontology.org/cgi-bin/amigo/term_details?term=GO:0032006
keratinization	Biological Process	GO:0031424	1	49	103	17517	0.00970873786407767	0.00279728263972141	0.2512636385	0.6631259	hsa:353131,LCE1A,353131:up	http://amigo.geneontology.org/cgi-bin/amigo/term_details?term=GO:0031424
positive regulation of catabolic process	Biological Process	GO:0009896	3	296	103	17517	0.029126213592233	0.0168978706399498	0.2526822295	0.6661370	hsa:339345,NANOS2,339345:up|hsa:3091,HIF1A,3091:up|hsa:51667,NUB1,51667:up	http://amigo.geneontology.org/cgi-bin/amigo/term_details?term=GO:0009896
nucleoside triphosphate metabolic process	Biological Process	GO:0009141	2	165	103	17517	0.0194174757281553	0.00941942113375578	0.2531814259	0.6667204	hsa:4538,ND4,4538:down|hsa:4537,ND3,4537:up	http://amigo.geneontology.org/cgi-bin/amigo/term_details?term=GO:0009141
RNA metabolic process	Biological Process	GO:0016070	28	4199	103	17517	0.271844660194175	0.239709996003882	0.2540763395	0.6683434	hsa:6202,RPS8,6202:down|hsa:55841,WWC3,55841:up|hsa:6187,RPS2,6187:down|hsa:55023,PHIP,55023:up|hsa:90,ACVR1,90:up|hsa:55279,ZNF654,55279:up|hsa:4291,MLF1,4291:up|hsa:10978,CLP1,10978:up|hsa:2274,FHL2,2274:up|hsa:10553,HTATIP2,10553:down|hsa:54925,ZSCAN32,54925:up|hsa:152992,TRMT44,152992:up|hsa:58509,CACTIN,58509:up|hsa:653619,PRAMEF15,653619:up|hsa:79650,USB1,79650:up|hsa:339345,NANOS2,339345:u…	http://amigo.geneontology.org/cgi-bin/amigo/term_details?term=GO:0016070
response to axon injury	Biological Process	GO:0048678	1	50	103	17517	0.00970873786407767	0.00285437004053205	0.2556785598	0.6696210	hsa:2043,EPHA4,2043:up	http://amigo.geneontology.org/cgi-bin/amigo/term_details?term=GO:0048678
cardiac septum morphogenesis	Biological Process	GO:0060411	1	50	103	17517	0.00970873786407767	0.00285437004053205	0.2556785598	0.6696210	hsa:90,ACVR1,90:up	http://amigo.geneontology.org/cgi-bin/amigo/term_details?term=GO:0060411
multi-organism cellular process	Biological Process	GO:0044764	6	729	103	17517	0.058252427184466	0.0416167151909574	0.2581542432	0.6746318	hsa:6202,RPS8,6202:down|hsa:10553,HTATIP2,10553:down|hsa:6143,RPL19,6143:down|hsa:6187,RPS2,6187:down|hsa:6161,RPL32,6161:down|hsa:5886,RAD23A,5886:down	http://amigo.geneontology.org/cgi-bin/amigo/term_details?term=GO:0044764
RNA biosynthetic process	Biological Process	GO:0032774	24	3559	103	17517	0.233009708737864	0.203174059485072	0.2590659954	0.6762778	hsa:6202,RPS8,6202:down|hsa:55841,WWC3,55841:up|hsa:6187,RPS2,6187:down|hsa:55023,PHIP,55023:up|hsa:90,ACVR1,90:up|hsa:55279,ZNF654,55279:up|hsa:4291,MLF1,4291:up|hsa:10978,CLP1,10978:up|hsa:2274,FHL2,2274:up|hsa:10553,HTATIP2,10553:down|hsa:54925,ZSCAN32,54925:up|hsa:58509,CACTIN,58509:up|hsa:653619,PRAMEF15,653619:up|hsa:6161,RPL32,6161:down|hsa:3091,HIF1A,3091:up|hsa:339559,ZFP69,339559:up|hsa…	http://amigo.geneontology.org/cgi-bin/amigo/term_details?term=GO:0032774
positive regulation of ion transmembrane transporter activity	Biological Process	GO:0032414	1	51	103	17517	0.00970873786407767	0.0029114574413427	0.2600676998	0.6766837	hsa:9722,NOS1AP,9722:up	http://amigo.geneontology.org/cgi-bin/amigo/term_details?term=GO:0032414
cardiac muscle tissue development	Biological Process	GO:0048738	2	169	103	17517	0.0194174757281553	0.00964777073699834	0.2618984246	0.6770229	hsa:90,ACVR1,90:up|hsa:2274,FHL2,2274:up	http://amigo.geneontology.org/cgi-bin/amigo/term_details?term=GO:0048738
positive regulation of neurogenesis	Biological Process	GO:0050769	3	302	103	17517	0.029126213592233	0.0172403950448136	0.2621739575	0.6770229	hsa:3091,HIF1A,3091:up|hsa:79816,TLE6,79816:down|hsa:2043,EPHA4,2043:up	http://amigo.geneontology.org/cgi-bin/amigo/term_details?term=GO:0050769
cell morphogenesis	Biological Process	GO:0000902	9	1187	103	17517	0.087378640776699	0.067762744762231	0.2630307147	0.6770229	hsa:55023,PHIP,55023:up|hsa:3091,HIF1A,3091:up|hsa:752,FMNL1,752:down|hsa:2043,EPHA4,2043:up|hsa:5864,RAB3A,5864:down|hsa:971,CD72,971:down|hsa:30011,SH3KBP1,30011:down|hsa:56288,PARD3,56288:up|hsa:199221,DZIP1L,199221:up	http://amigo.geneontology.org/cgi-bin/amigo/term_details?term=GO:0000902
ribonucleotide metabolic process	Biological Process	GO:0009259	4	443	103	17517	0.0388349514563107	0.025289718559114	0.2636555716	0.6770229	hsa:2821,GPI,2821:up|hsa:4538,ND4,4538:down|hsa:3091,HIF1A,3091:up|hsa:4537,ND3,4537:up	http://amigo.geneontology.org/cgi-bin/amigo/term_details?term=GO:0009259
ribonucleoprotein complex biogenesis	Biological Process	GO:0022613	3	303	103	17517	0.029126213592233	0.0172974824456243	0.2637606594	0.6770229	hsa:6202,RPS8,6202:down|hsa:51388,NIP7,51388:up|hsa:10978,CLP1,10978:up	http://amigo.geneontology.org/cgi-bin/amigo/term_details?term=GO:0022613
regulation of neurological system process	Biological Process	GO:0031644	1	52	103	17517	0.00970873786407767	0.00296854484215334	0.2644312076	0.6770229	hsa:56288,PARD3,56288:up	http://amigo.geneontology.org/cgi-bin/amigo/term_details?term=GO:0031644
regulation of interleukin-8 production	Biological Process	GO:0032677	1	52	103	17517	0.00970873786407767	0.00296854484215334	0.2644312076	0.6770229	hsa:58509,CACTIN,58509:up	http://amigo.geneontology.org/cgi-bin/amigo/term_details?term=GO:0032677
astrocyte differentiation	Biological Process	GO:0048708	1	52	103	17517	0.00970873786407767	0.00296854484215334	0.2644312076	0.6770229	hsa:2043,EPHA4,2043:up	http://amigo.geneontology.org/cgi-bin/amigo/term_details?term=GO:0048708
organ regeneration	Biological Process	GO:0031100	1	52	103	17517	0.00970873786407767	0.00296854484215334	0.2644312076	0.6770229	hsa:26019,UPF2,26019:up	http://amigo.geneontology.org/cgi-bin/amigo/term_details?term=GO:0031100
regulation of lymphocyte apoptotic process	Biological Process	GO:0070228	1	52	103	17517	0.00970873786407767	0.00296854484215334	0.2644312076	0.6770229	hsa:3091,HIF1A,3091:up	http://amigo.geneontology.org/cgi-bin/amigo/term_details?term=GO:0070228
epithelial cell morphogenesis	Biological Process	GO:0003382	1	52	103	17517	0.00970873786407767	0.00296854484215334	0.2644312076	0.6770229	hsa:56288,PARD3,56288:up	http://amigo.geneontology.org/cgi-bin/amigo/term_details?term=GO:0003382
regulation of ossification	Biological Process	GO:0030278	2	172	103	17517	0.0194174757281553	0.00981903293943027	0.2684386452	0.6808631	hsa:90,ACVR1,90:up|hsa:3091,HIF1A,3091:up	http://amigo.geneontology.org/cgi-bin/amigo/term_details?term=GO:0030278
spindle checkpoint	Biological Process	GO:0031577	1	53	103	17517	0.00970873786407767	0.00302563224296398	0.2687692314	0.6808631	hsa:10397,NDRG1,10397:up	http://amigo.geneontology.org/cgi-bin/amigo/term_details?term=GO:0031577
visual behavior	Biological Process	GO:0007632	1	53	103	17517	0.00970873786407767	0.00302563224296398	0.2687692314	0.6808631	hsa:3091,HIF1A,3091:up	http://amigo.geneontology.org/cgi-bin/amigo/term_details?term=GO:0007632
positive regulation of insulin secretion	Biological Process	GO:0032024	1	53	103	17517	0.00970873786407767	0.00302563224296398	0.2687692314	0.6808631	hsa:3091,HIF1A,3091:up	http://amigo.geneontology.org/cgi-bin/amigo/term_details?term=GO:0032024
digestive tract morphogenesis	Biological Process	GO:0048546	1	53	103	17517	0.00970873786407767	0.00302563224296398	0.2687692314	0.6808631	hsa:3091,HIF1A,3091:up	http://amigo.geneontology.org/cgi-bin/amigo/term_details?term=GO:0048546
positive regulation of nuclear division	Biological Process	GO:0051785	1	53	103	17517	0.00970873786407767	0.00302563224296398	0.2687692314	0.6808631	hsa:55023,PHIP,55023:up	http://amigo.geneontology.org/cgi-bin/amigo/term_details?term=GO:0051785
columnar/cuboidal epithelial cell development	Biological Process	GO:0002066	1	53	103	17517	0.00970873786407767	0.00302563224296398	0.2687692314	0.6808631	hsa:3091,HIF1A,3091:up	http://amigo.geneontology.org/cgi-bin/amigo/term_details?term=GO:0002066
cilium organization	Biological Process	GO:0044782	2	173	103	17517	0.0194174757281553	0.00987612034024091	0.2706187797	0.6848254	hsa:257177,CFAP126,257177:down|hsa:199221,DZIP1L,199221:up	http://amigo.geneontology.org/cgi-bin/amigo/term_details?term=GO:0044782
purine nucleotide metabolic process	Biological Process	GO:0006163	4	450	103	17517	0.0388349514563107	0.0256893303647885	0.2727624817	0.6852757	hsa:2821,GPI,2821:up|hsa:4538,ND4,4538:down|hsa:3091,HIF1A,3091:up|hsa:4537,ND3,4537:up	http://amigo.geneontology.org/cgi-bin/amigo/term_details?term=GO:0006163
regulation of stress-activated MAPK cascade	Biological Process	GO:0032872	2	174	103	17517	0.0194174757281553	0.00993320774105155	0.2727988200	0.6852757	hsa:2043,EPHA4,2043:up|hsa:4293,MAP3K9,4293:down	http://amigo.geneontology.org/cgi-bin/amigo/term_details?term=GO:0032872
chemokine-mediated signaling pathway	Biological Process	GO:0070098	1	54	103	17517	0.00970873786407767	0.00308271964377462	0.2730819186	0.6852757	hsa:3091,HIF1A,3091:up	http://amigo.geneontology.org/cgi-bin/amigo/term_details?term=GO:0070098
regulation of glial cell differentiation	Biological Process	GO:0045685	1	54	103	17517	0.00970873786407767	0.00308271964377462	0.2730819186	0.6852757	hsa:2043,EPHA4,2043:up	http://amigo.geneontology.org/cgi-bin/amigo/term_details?term=GO:0045685
positive regulation of cation transmembrane transport	Biological Process	GO:1904064	1	54	103	17517	0.00970873786407767	0.00308271964377462	0.2730819186	0.6852757	hsa:9722,NOS1AP,9722:up	http://amigo.geneontology.org/cgi-bin/amigo/term_details?term=GO:1904064
regulation of chemokine production	Biological Process	GO:0032642	1	54	103	17517	0.00970873786407767	0.00308271964377462	0.2730819186	0.6852757	hsa:3091,HIF1A,3091:up	http://amigo.geneontology.org/cgi-bin/amigo/term_details?term=GO:0032642
regulation of stress-activated protein kinase signaling cascade	Biological Process	GO:0070302	2	175	103	17517	0.0194174757281553	0.00999029514186219	0.2749786924	0.6885949	hsa:2043,EPHA4,2043:up|hsa:4293,MAP3K9,4293:down	http://amigo.geneontology.org/cgi-bin/amigo/term_details?term=GO:0070302
cellular respiration	Biological Process	GO:0045333	2	175	103	17517	0.0194174757281553	0.00999029514186219	0.2749786924	0.6885949	hsa:4538,ND4,4538:down|hsa:4537,ND3,4537:up	http://amigo.geneontology.org/cgi-bin/amigo/term_details?term=GO:0045333
positive regulation of cell migration	Biological Process	GO:0030335	3	311	103	17517	0.029126213592233	0.0177541816521094	0.2764969236	0.6909753	hsa:154810,AMOTL1,154810:up|hsa:3091,HIF1A,3091:up|hsa:23473,CAPN7,23473:up	http://amigo.geneontology.org/cgi-bin/amigo/term_details?term=GO:0030335
heart looping	Biological Process	GO:0001947	1	55	103	17517	0.00970873786407767	0.00313980704458526	0.2773694157	0.6909753	hsa:3091,HIF1A,3091:up	http://amigo.geneontology.org/cgi-bin/amigo/term_details?term=GO:0001947
iron ion transport	Biological Process	GO:0006826	1	55	103	17517	0.00970873786407767	0.00313980704458526	0.2773694157	0.6909753	hsa:2495,FTH1,2495:down	http://amigo.geneontology.org/cgi-bin/amigo/term_details?term=GO:0006826
regulation of reactive oxygen species biosynthetic process	Biological Process	GO:1903426	1	55	103	17517	0.00970873786407767	0.00313980704458526	0.2773694157	0.6909753	hsa:9722,NOS1AP,9722:up	http://amigo.geneontology.org/cgi-bin/amigo/term_details?term=GO:1903426
neuroblast proliferation	Biological Process	GO:0007405	1	55	103	17517	0.00970873786407767	0.00313980704458526	0.2773694157	0.6909753	hsa:3091,HIF1A,3091:up	http://amigo.geneontology.org/cgi-bin/amigo/term_details?term=GO:0007405
nucleotide metabolic process	Biological Process	GO:0009117	5	603	103	17517	0.0485436893203883	0.0344237026888166	0.2813742098	0.6965308	hsa:2821,GPI,2821:up|hsa:4538,ND4,4538:down|hsa:3091,HIF1A,3091:up|hsa:115004,MB21D1,115004:down|hsa:4537,ND3,4537:up	http://amigo.geneontology.org/cgi-bin/amigo/term_details?term=GO:0009117
cellular aldehyde metabolic process	Biological Process	GO:0006081	1	56	103	17517	0.00970873786407767	0.0031968944453959	0.2816318685	0.6965308	hsa:2821,GPI,2821:up	http://amigo.geneontology.org/cgi-bin/amigo/term_details?term=GO:0006081
synaptic vesicle exocytosis	Biological Process	GO:0016079	1	56	103	17517	0.00970873786407767	0.0031968944453959	0.2816318685	0.6965308	hsa:5864,RAB3A,5864:down	http://amigo.geneontology.org/cgi-bin/amigo/term_details?term=GO:0016079
positive regulation of proteasomal ubiquitin-dependent protein catabolic process	Biological Process	GO:0032436	1	56	103	17517	0.00970873786407767	0.0031968944453959	0.2816318685	0.6965308	hsa:51667,NUB1,51667:up	http://amigo.geneontology.org/cgi-bin/amigo/term_details?term=GO:0032436
cardiac muscle cell development	Biological Process	GO:0055013	1	56	103	17517	0.00970873786407767	0.0031968944453959	0.2816318685	0.6965308	hsa:2274,FHL2,2274:up	http://amigo.geneontology.org/cgi-bin/amigo/term_details?term=GO:0055013
interleukin-8 production	Biological Process	GO:0032637	1	56	103	17517	0.00970873786407767	0.0031968944453959	0.2816318685	0.6965308	hsa:58509,CACTIN,58509:up	http://amigo.geneontology.org/cgi-bin/amigo/term_details?term=GO:0032637
ribose phosphate metabolic process	Biological Process	GO:0019693	4	458	103	17517	0.0388349514563107	0.0261460295712736	0.2832382499	0.6995642	hsa:2821,GPI,2821:up|hsa:4538,ND4,4538:down|hsa:3091,HIF1A,3091:up|hsa:4537,ND3,4537:up	http://amigo.geneontology.org/cgi-bin/amigo/term_details?term=GO:0019693
nitrogen compound metabolic process	Biological Process	GO:0006807	39	6084	103	17517	0.378640776699029	0.34731974653194	0.2834415914	0.6995642	hsa:6202,RPS8,6202:down|hsa:6187,RPS2,6187:down|hsa:90,ACVR1,90:up|hsa:4291,MLF1,4291:up|hsa:10978,CLP1,10978:up|hsa:54925,ZSCAN32,54925:up|hsa:9722,NOS1AP,9722:up|hsa:653619,PRAMEF15,653619:up|hsa:79650,USB1,79650:up|hsa:5886,RAD23A,5886:down|hsa:339559,ZFP69,339559:up|hsa:23263,MCF2L,23263:down|hsa:4293,MAP3K9,4293:down|hsa:6143,RPL19,6143:down|hsa:26019,UPF2,26019:up|hsa:79816,TLE6,79816:down|…	http://amigo.geneontology.org/cgi-bin/amigo/term_details?term=GO:0006807
response to fatty acid	Biological Process	GO:0070542	1	57	103	17517	0.00970873786407767	0.00325398184620654	0.2858694218	0.7005203	hsa:1373,CPS1,1373:up	http://amigo.geneontology.org/cgi-bin/amigo/term_details?term=GO:0070542
cell death in response to oxidative stress	Biological Process	GO:0036473	1	57	103	17517	0.00970873786407767	0.00325398184620654	0.2858694218	0.7005203	hsa:3091,HIF1A,3091:up	http://amigo.geneontology.org/cgi-bin/amigo/term_details?term=GO:0036473
positive regulation of cellular carbohydrate metabolic process	Biological Process	GO:0010676	1	57	103	17517	0.00970873786407767	0.00325398184620654	0.2858694218	0.7005203	hsa:3091,HIF1A,3091:up	http://amigo.geneontology.org/cgi-bin/amigo/term_details?term=GO:0010676
regulation of pathway-restricted SMAD protein phosphorylation	Biological Process	GO:0060393	1	57	103	17517	0.00970873786407767	0.00325398184620654	0.2858694218	0.7005203	hsa:90,ACVR1,90:up	http://amigo.geneontology.org/cgi-bin/amigo/term_details?term=GO:0060393
regulation of calcium ion transmembrane transporter activity	Biological Process	GO:1901019	1	57	103	17517	0.00970873786407767	0.00325398184620654	0.2858694218	0.7005203	hsa:9722,NOS1AP,9722:up	http://amigo.geneontology.org/cgi-bin/amigo/term_details?term=GO:1901019
regulation of calcium ion transmembrane transport	Biological Process	GO:1903169	1	57	103	17517	0.00970873786407767	0.00325398184620654	0.2858694218	0.7005203	hsa:9722,NOS1AP,9722:up	http://amigo.geneontology.org/cgi-bin/amigo/term_details?term=GO:1903169
positive regulation of cell motility	Biological Process	GO:2000147	3	318	103	17517	0.029126213592233	0.0181537934577839	0.2876939642	0.7025780	hsa:154810,AMOTL1,154810:up|hsa:3091,HIF1A,3091:up|hsa:23473,CAPN7,23473:up	http://amigo.geneontology.org/cgi-bin/amigo/term_details?term=GO:2000147
nucleoside phosphate metabolic process	Biological Process	GO:0006753	5	609	103	17517	0.0485436893203883	0.0347662270936804	0.2882076799	0.7025780	hsa:2821,GPI,2821:up|hsa:4538,ND4,4538:down|hsa:3091,HIF1A,3091:up|hsa:115004,MB21D1,115004:down|hsa:4537,ND3,4537:up	http://amigo.geneontology.org/cgi-bin/amigo/term_details?term=GO:0006753
heterocycle metabolic process	Biological Process	GO:0046483	35	5432	103	17517	0.339805825242718	0.310098761203402	0.2890970590	0.7025780	hsa:6202,RPS8,6202:down|hsa:6187,RPS2,6187:down|hsa:90,ACVR1,90:up|hsa:4291,MLF1,4291:up|hsa:10978,CLP1,10978:up|hsa:54925,ZSCAN32,54925:up|hsa:653619,PRAMEF15,653619:up|hsa:79650,USB1,79650:up|hsa:5886,RAD23A,5886:down|hsa:339559,ZFP69,339559:up|hsa:23263,MCF2L,23263:down|hsa:4293,MAP3K9,4293:down|hsa:6143,RPL19,6143:down|hsa:26019,UPF2,26019:up|hsa:79816,TLE6,79816:down|hsa:55841,WWC3,55841:up|…	http://amigo.geneontology.org/cgi-bin/amigo/term_details?term=GO:0046483
response to dsRNA	Biological Process	GO:0043331	1	58	103	17517	0.00970873786407767	0.00331106924701718	0.2900822196	0.7025780	hsa:115004,MB21D1,115004:down	http://amigo.geneontology.org/cgi-bin/amigo/term_details?term=GO:0043331
regulation of dendrite morphogenesis	Biological Process	GO:0048814	1	58	103	17517	0.00970873786407767	0.00331106924701718	0.2900822196	0.7025780	hsa:2043,EPHA4,2043:up	http://amigo.geneontology.org/cgi-bin/amigo/term_details?term=GO:0048814
cardiac cell development	Biological Process	GO:0055006	1	58	103	17517	0.00970873786407767	0.00331106924701718	0.2900822196	0.7025780	hsa:2274,FHL2,2274:up	http://amigo.geneontology.org/cgi-bin/amigo/term_details?term=GO:0055006
determination of heart left/right asymmetry	Biological Process	GO:0061371	1	58	103	17517	0.00970873786407767	0.00331106924701718	0.2900822196	0.7025780	hsa:3091,HIF1A,3091:up	http://amigo.geneontology.org/cgi-bin/amigo/term_details?term=GO:0061371
positive regulation of transporter activity	Biological Process	GO:0032411	1	58	103	17517	0.00970873786407767	0.00331106924701718	0.2900822196	0.7025780	hsa:9722,NOS1AP,9722:up	http://amigo.geneontology.org/cgi-bin/amigo/term_details?term=GO:0032411
ribosome biogenesis	Biological Process	GO:0042254	2	182	103	17517	0.0194174757281553	0.0103899069475367	0.2902270968	0.7025780	hsa:6202,RPS8,6202:down|hsa:51388,NIP7,51388:up	http://amigo.geneontology.org/cgi-bin/amigo/term_details?term=GO:0042254
activation of innate immune response	Biological Process	GO:0002218	2	183	103	17517	0.0194174757281553	0.0104469943483473	0.2924030787	0.7038432	hsa:115004,MB21D1,115004:down|hsa:58509,CACTIN,58509:up	http://amigo.geneontology.org/cgi-bin/amigo/term_details?term=GO:0002218
JNK cascade	Biological Process	GO:0007254	2	183	103	17517	0.0194174757281553	0.0104469943483473	0.2924030787	0.7038432	hsa:2043,EPHA4,2043:up|hsa:4293,MAP3K9,4293:down	http://amigo.geneontology.org/cgi-bin/amigo/term_details?term=GO:0007254
cellular response to organic cyclic compound	Biological Process	GO:0071407	3	321	103	17517	0.029126213592233	0.0183250556602158	0.2925048322	0.7038432	hsa:1373,CPS1,1373:up|hsa:90,ACVR1,90:up|hsa:115004,MB21D1,115004:down	http://amigo.geneontology.org/cgi-bin/amigo/term_details?term=GO:0071407
negative regulation of phosphorus metabolic process	Biological Process	GO:0010563	4	466	103	17517	0.0388349514563107	0.0266027287777587	0.2937772088	0.7038432	hsa:5999,RGS4,5999:down|hsa:1850,DUSP8,1850:up|hsa:58509,CACTIN,58509:up|hsa:56288,PARD3,56288:up	http://amigo.geneontology.org/cgi-bin/amigo/term_details?term=GO:0010563
negative regulation of phosphate metabolic process	Biological Process	GO:0045936	4	466	103	17517	0.0388349514563107	0.0266027287777587	0.2937772088	0.7038432	hsa:5999,RGS4,5999:down|hsa:1850,DUSP8,1850:up|hsa:58509,CACTIN,58509:up|hsa:56288,PARD3,56288:up	http://amigo.geneontology.org/cgi-bin/amigo/term_details?term=GO:0045936
positive regulation of multicellular organismal process	Biological Process	GO:0051240	9	1226	103	17517	0.087378640776699	0.069989153393846	0.2941954519	0.7038432	hsa:154810,AMOTL1,154810:up|hsa:1373,CPS1,1373:up|hsa:90,ACVR1,90:up|hsa:3091,HIF1A,3091:up|hsa:115004,MB21D1,115004:down|hsa:23473,CAPN7,23473:up|hsa:2043,EPHA4,2043:up|hsa:79816,TLE6,79816:down|hsa:56288,PARD3,56288:up	http://amigo.geneontology.org/cgi-bin/amigo/term_details?term=GO:0051240
regulation of neurotransmitter transport	Biological Process	GO:0051588	1	59	103	17517	0.00970873786407767	0.00336815664782782	0.2942704051	0.7038432	hsa:5864,RAB3A,5864:down	http://amigo.geneontology.org/cgi-bin/amigo/term_details?term=GO:0051588
vesicle docking	Biological Process	GO:0048278	1	59	103	17517	0.00970873786407767	0.00336815664782782	0.2942704051	0.7038432	hsa:5864,RAB3A,5864:down	http://amigo.geneontology.org/cgi-bin/amigo/term_details?term=GO:0048278
nitric oxide biosynthetic process	Biological Process	GO:0006809	1	59	103	17517	0.00970873786407767	0.00336815664782782	0.2942704051	0.7038432	hsa:9722,NOS1AP,9722:up	http://amigo.geneontology.org/cgi-bin/amigo/term_details?term=GO:0006809
positive regulation of osteoblast differentiation	Biological Process	GO:0045669	1	59	103	17517	0.00970873786407767	0.00336815664782782	0.2942704051	0.7038432	hsa:90,ACVR1,90:up	http://amigo.geneontology.org/cgi-bin/amigo/term_details?term=GO:0045669
positive regulation of endothelial cell migration	Biological Process	GO:0010595	1	59	103	17517	0.00970873786407767	0.00336815664782782	0.2942704051	0.7038432	hsa:154810,AMOTL1,154810:up	http://amigo.geneontology.org/cgi-bin/amigo/term_details?term=GO:0010595
cellular aromatic compound metabolic process	Biological Process	GO:0006725	35	5446	103	17517	0.339805825242718	0.310897984814751	0.2951948608	0.7053511	hsa:6202,RPS8,6202:down|hsa:6187,RPS2,6187:down|hsa:90,ACVR1,90:up|hsa:4291,MLF1,4291:up|hsa:10978,CLP1,10978:up|hsa:54925,ZSCAN32,54925:up|hsa:653619,PRAMEF15,653619:up|hsa:79650,USB1,79650:up|hsa:5886,RAD23A,5886:down|hsa:339559,ZFP69,339559:up|hsa:23263,MCF2L,23263:down|hsa:4293,MAP3K9,4293:down|hsa:6143,RPL19,6143:down|hsa:26019,UPF2,26019:up|hsa:79816,TLE6,79816:down|hsa:55841,WWC3,55841:up|…	http://amigo.geneontology.org/cgi-bin/amigo/term_details?term=GO:0006725
TOR signaling	Biological Process	GO:0031929	1	60	103	17517	0.00970873786407767	0.00342524404863847	0.2984341208	0.7109667	hsa:3091,HIF1A,3091:up	http://amigo.geneontology.org/cgi-bin/amigo/term_details?term=GO:0031929
pathway-restricted SMAD protein phosphorylation	Biological Process	GO:0060389	1	60	103	17517	0.00970873786407767	0.00342524404863847	0.2984341208	0.7109667	hsa:90,ACVR1,90:up	http://amigo.geneontology.org/cgi-bin/amigo/term_details?term=GO:0060389
outflow tract morphogenesis	Biological Process	GO:0003151	1	60	103	17517	0.00970873786407767	0.00342524404863847	0.2984341208	0.7109667	hsa:3091,HIF1A,3091:up	http://amigo.geneontology.org/cgi-bin/amigo/term_details?term=GO:0003151
cellular developmental process	Biological Process	GO:0048869	24	3643	103	17517	0.233009708737864	0.207969401153166	0.3003390180	0.7145547	hsa:10501,SEMA6B,10501:down|hsa:1373,CPS1,1373:up|hsa:55023,PHIP,55023:up|hsa:90,ACVR1,90:up|hsa:10397,NDRG1,10397:up|hsa:4291,MLF1,4291:up|hsa:2043,EPHA4,2043:up|hsa:4810,NHS,4810:down|hsa:2274,FHL2,2274:up|hsa:10553,HTATIP2,10553:down|hsa:971,CD72,971:down|hsa:79819,WDR78,79819:up|hsa:30011,SH3KBP1,30011:down|hsa:653619,PRAMEF15,653619:up|hsa:353131,LCE1A,353131:up|hsa:199221,DZIP1L,199221:up|h…	http://amigo.geneontology.org/cgi-bin/amigo/term_details?term=GO:0048869
regulation of multi-organism process	Biological Process	GO:0043900	3	326	103	17517	0.029126213592233	0.018610492664269	0.3005359354	0.7145547	hsa:115004,MB21D1,115004:down|hsa:58509,CACTIN,58509:up|hsa:5886,RAD23A,5886:down	http://amigo.geneontology.org/cgi-bin/amigo/term_details?term=GO:0043900
positive regulation of cellular component movement	Biological Process	GO:0051272	3	327	103	17517	0.029126213592233	0.0186675800650796	0.3021438229	0.7172666	hsa:154810,AMOTL1,154810:up|hsa:3091,HIF1A,3091:up|hsa:23473,CAPN7,23473:up	http://amigo.geneontology.org/cgi-bin/amigo/term_details?term=GO:0051272
positive regulation of proteasomal protein catabolic process	Biological Process	GO:1901800	1	61	103	17517	0.00970873786407767	0.00348233144944911	0.3025735082	0.7172666	hsa:51667,NUB1,51667:up	http://amigo.geneontology.org/cgi-bin/amigo/term_details?term=GO:1901800
lymphocyte homeostasis	Biological Process	GO:0002260	1	61	103	17517	0.00970873786407767	0.00348233144944911	0.3025735082	0.7172666	hsa:3091,HIF1A,3091:up	http://amigo.geneontology.org/cgi-bin/amigo/term_details?term=GO:0002260
regulation of neuron apoptotic process	Biological Process	GO:0043523	2	189	103	17517	0.0194174757281553	0.0107895187532112	0.3054400660	0.7220277	hsa:2821,GPI,2821:up|hsa:3091,HIF1A,3091:up	http://amigo.geneontology.org/cgi-bin/amigo/term_details?term=GO:0043523
chemokine production	Biological Process	GO:0032602	1	62	103	17517	0.00970873786407767	0.00353941885025975	0.3066887080	0.7220277	hsa:3091,HIF1A,3091:up	http://amigo.geneontology.org/cgi-bin/amigo/term_details?term=GO:0032602
respiratory gaseous exchange	Biological Process	GO:0007585	1	62	103	17517	0.00970873786407767	0.00353941885025975	0.3066887080	0.7220277	hsa:5864,RAB3A,5864:down	http://amigo.geneontology.org/cgi-bin/amigo/term_details?term=GO:0007585
androgen receptor signaling pathway	Biological Process	GO:0030521	1	62	103	17517	0.00970873786407767	0.00353941885025975	0.3066887080	0.7220277	hsa:2274,FHL2,2274:up	http://amigo.geneontology.org/cgi-bin/amigo/term_details?term=GO:0030521
regulation of angiogenesis	Biological Process	GO:0045765	2	190	103	17517	0.0194174757281553	0.0108466061540218	0.3076091545	0.7227761	hsa:10553,HTATIP2,10553:down|hsa:3091,HIF1A,3091:up	http://amigo.geneontology.org/cgi-bin/amigo/term_details?term=GO:0045765
transforming growth factor beta receptor signaling pathway	Biological Process	GO:0007179	2	190	103	17517	0.0194174757281553	0.0108466061540218	0.3076091545	0.7227761	hsa:90,ACVR1,90:up|hsa:56288,PARD3,56288:up	http://amigo.geneontology.org/cgi-bin/amigo/term_details?term=GO:0007179
regulation of potassium ion transport	Biological Process	GO:0043266	1	63	103	17517	0.00970873786407767	0.00359650625107039	0.3107798603	0.7237023	hsa:9722,NOS1AP,9722:up	http://amigo.geneontology.org/cgi-bin/amigo/term_details?term=GO:0043266
cardiac ventricle morphogenesis	Biological Process	GO:0003208	1	63	103	17517	0.00970873786407767	0.00359650625107039	0.3107798603	0.7237023	hsa:3091,HIF1A,3091:up	http://amigo.geneontology.org/cgi-bin/amigo/term_details?term=GO:0003208
activation of MAPKK activity	Biological Process	GO:0000186	1	63	103	17517	0.00970873786407767	0.00359650625107039	0.3107798603	0.7237023	hsa:4293,MAP3K9,4293:down	http://amigo.geneontology.org/cgi-bin/amigo/term_details?term=GO:0000186
enzyme linked receptor protein signaling pathway	Biological Process	GO:0007167	8	1090	103	17517	0.0776699029126214	0.0622252668835988	0.3108736107	0.7237023	hsa:55023,PHIP,55023:up|hsa:90,ACVR1,90:up|hsa:3091,HIF1A,3091:up|hsa:23263,MCF2L,23263:down|hsa:2043,EPHA4,2043:up|hsa:56288,PARD3,56288:up|hsa:64857,PLEKHG2,64857:down|hsa:30011,SH3KBP1,30011:down	http://amigo.geneontology.org/cgi-bin/amigo/term_details?term=GO:0007167
symbiosis, encompassing mutualism through parasitism	Biological Process	GO:0044403	6	781	103	17517	0.058252427184466	0.0445852600331107	0.3110200366	0.7237023	hsa:6202,RPS8,6202:down|hsa:10553,HTATIP2,10553:down|hsa:6143,RPL19,6143:down|hsa:6187,RPS2,6187:down|hsa:6161,RPL32,6161:down|hsa:5886,RAD23A,5886:down	http://amigo.geneontology.org/cgi-bin/amigo/term_details?term=GO:0044403
interspecies interaction between organisms	Biological Process	GO:0044419	6	781	103	17517	0.058252427184466	0.0445852600331107	0.3110200366	0.7237023	hsa:6202,RPS8,6202:down|hsa:10553,HTATIP2,10553:down|hsa:6143,RPL19,6143:down|hsa:6187,RPS2,6187:down|hsa:6161,RPL32,6161:down|hsa:5886,RAD23A,5886:down	http://amigo.geneontology.org/cgi-bin/amigo/term_details?term=GO:0044419
regulation of cellular catabolic process	Biological Process	GO:0031329	4	481	103	17517	0.0388349514563107	0.0274590397899184	0.3136753194	0.7245803	hsa:339345,NANOS2,339345:up|hsa:3091,HIF1A,3091:up|hsa:51667,NUB1,51667:up|hsa:5886,RAD23A,5886:down	http://amigo.geneontology.org/cgi-bin/amigo/term_details?term=GO:0031329
gene silencing by RNA	Biological Process	GO:0031047	1	64	103	17517	0.00970873786407767	0.00365359365188103	0.3148471042	0.7245803	hsa:10978,CLP1,10978:up	http://amigo.geneontology.org/cgi-bin/amigo/term_details?term=GO:0031047
hormone biosynthetic process	Biological Process	GO:0042446	1	64	103	17517	0.00970873786407767	0.00365359365188103	0.3148471042	0.7245803	hsa:3091,HIF1A,3091:up	http://amigo.geneontology.org/cgi-bin/amigo/term_details?term=GO:0042446
negative regulation of ossification	Biological Process	GO:0030279	1	64	103	17517	0.00970873786407767	0.00365359365188103	0.3148471042	0.7245803	hsa:3091,HIF1A,3091:up	http://amigo.geneontology.org/cgi-bin/amigo/term_details?term=GO:0030279
positive regulation of carbohydrate metabolic process	Biological Process	GO:0045913	1	64	103	17517	0.00970873786407767	0.00365359365188103	0.3148471042	0.7245803	hsa:3091,HIF1A,3091:up	http://amigo.geneontology.org/cgi-bin/amigo/term_details?term=GO:0045913
blood vessel morphogenesis	Biological Process	GO:0048514	4	482	103	17517	0.0388349514563107	0.027516127190729	0.3150070863	0.7245803	hsa:10553,HTATIP2,10553:down|hsa:2821,GPI,2821:up|hsa:90,ACVR1,90:up|hsa:3091,HIF1A,3091:up	http://amigo.geneontology.org/cgi-bin/amigo/term_details?term=GO:0048514
positive regulation of locomotion	Biological Process	GO:0040017	3	335	103	17517	0.029126213592233	0.0191242792715648	0.3150217798	0.7245803	hsa:154810,AMOTL1,154810:up|hsa:3091,HIF1A,3091:up|hsa:23473,CAPN7,23473:up	http://amigo.geneontology.org/cgi-bin/amigo/term_details?term=GO:0040017
regulation of proteasomal protein catabolic process	Biological Process	GO:0061136	2	194	103	17517	0.0194174757281553	0.0110749557572644	0.3162725719	0.7263987	hsa:51667,NUB1,51667:up|hsa:5886,RAD23A,5886:down	http://amigo.geneontology.org/cgi-bin/amigo/term_details?term=GO:0061136
small GTPase mediated signal transduction	Biological Process	GO:0007264	5	634	103	17517	0.0485436893203883	0.0361934121139465	0.3169946725	0.7263987	hsa:5999,RGS4,5999:down|hsa:23263,MCF2L,23263:down|hsa:54622,ARL15,54622:up|hsa:64857,PLEKHG2,64857:down|hsa:5864,RAB3A,5864:down	http://amigo.geneontology.org/cgi-bin/amigo/term_details?term=GO:0007264
positive regulation of exocytosis	Biological Process	GO:0045921	1	65	103	17517	0.00970873786407767	0.00371068105269167	0.3188905780	0.7263987	hsa:5864,RAB3A,5864:down	http://amigo.geneontology.org/cgi-bin/amigo/term_details?term=GO:0045921
nuclear-transcribed mRNA catabolic process, deadenylation-dependent decay	Biological Process	GO:0000288	1	65	103	17517	0.00970873786407767	0.00371068105269167	0.3188905780	0.7263987	hsa:339345,NANOS2,339345:up	http://amigo.geneontology.org/cgi-bin/amigo/term_details?term=GO:0000288
vasodilation	Biological Process	GO:0042311	1	65	103	17517	0.00970873786407767	0.00371068105269167	0.3188905780	0.7263987	hsa:1373,CPS1,1373:up	http://amigo.geneontology.org/cgi-bin/amigo/term_details?term=GO:0042311
regulation of anatomical structure morphogenesis	Biological Process	GO:0022603	6	789	103	17517	0.058252427184466	0.0450419592395958	0.3193352278	0.7263987	hsa:10553,HTATIP2,10553:down|hsa:55023,PHIP,55023:up|hsa:3091,HIF1A,3091:up|hsa:752,FMNL1,752:down|hsa:30011,SH3KBP1,30011:down|hsa:2043,EPHA4,2043:up	http://amigo.geneontology.org/cgi-bin/amigo/term_details?term=GO:0022603
osteoblast differentiation	Biological Process	GO:0001649	2	196	103	17517	0.0194174757281553	0.0111891305588857	0.3205956959	0.7263987	hsa:90,ACVR1,90:up|hsa:2274,FHL2,2274:up	http://amigo.geneontology.org/cgi-bin/amigo/term_details?term=GO:0001649
second-messenger-mediated signaling	Biological Process	GO:0019932	2	196	103	17517	0.0194174757281553	0.0111891305588857	0.3205956959	0.7263987	hsa:11123,RCAN3,11123:up|hsa:9722,NOS1AP,9722:up	http://amigo.geneontology.org/cgi-bin/amigo/term_details?term=GO:0019932
cellular response to lipid	Biological Process	GO:0071396	3	339	103	17517	0.029126213592233	0.0193526288748073	0.3214675521	0.7263987	hsa:1373,CPS1,1373:up|hsa:90,ACVR1,90:up|hsa:58509,CACTIN,58509:up	http://amigo.geneontology.org/cgi-bin/amigo/term_details?term=GO:0071396
negative regulation of NF-kappaB transcription factor activity	Biological Process	GO:0032088	1	66	103	17517	0.00970873786407767	0.00376776845350231	0.3229104193	0.7263987	hsa:58509,CACTIN,58509:up	http://amigo.geneontology.org/cgi-bin/amigo/term_details?term=GO:0032088
glutamine family amino acid metabolic process	Biological Process	GO:0009064	1	66	103	17517	0.00970873786407767	0.00376776845350231	0.3229104193	0.7263987	hsa:1373,CPS1,1373:up	http://amigo.geneontology.org/cgi-bin/amigo/term_details?term=GO:0009064
regulation of viral genome replication	Biological Process	GO:0045069	1	66	103	17517	0.00970873786407767	0.00376776845350231	0.3229104193	0.7263987	hsa:5886,RAD23A,5886:down	http://amigo.geneontology.org/cgi-bin/amigo/term_details?term=GO:0045069
lens development in camera-type eye	Biological Process	GO:0002088	1	66	103	17517	0.00970873786407767	0.00376776845350231	0.3229104193	0.7263987	hsa:4810,NHS,4810:down	http://amigo.geneontology.org/cgi-bin/amigo/term_details?term=GO:0002088
positive regulation of endothelial cell proliferation	Biological Process	GO:0001938	1	66	103	17517	0.00970873786407767	0.00376776845350231	0.3229104193	0.7263987	hsa:3091,HIF1A,3091:up	http://amigo.geneontology.org/cgi-bin/amigo/term_details?term=GO:0001938
negative regulation of nuclear division	Biological Process	GO:0051784	1	66	103	17517	0.00970873786407767	0.00376776845350231	0.3229104193	0.7263987	hsa:339345,NANOS2,339345:up	http://amigo.geneontology.org/cgi-bin/amigo/term_details?term=GO:0051784
mesoderm formation	Biological Process	GO:0001707	1	66	103	17517	0.00970873786407767	0.00376776845350231	0.3229104193	0.7263987	hsa:90,ACVR1,90:up	http://amigo.geneontology.org/cgi-bin/amigo/term_details?term=GO:0001707
intrinsic apoptotic signaling pathway by p53 class mediator	Biological Process	GO:0072332	1	66	103	17517	0.00970873786407767	0.00376776845350231	0.3229104193	0.7263987	hsa:79073,TMEM109,79073:down	http://amigo.geneontology.org/cgi-bin/amigo/term_details?term=GO:0072332
stem cell differentiation	Biological Process	GO:0048863	3	340	103	17517	0.029126213592233	0.019409716275618	0.3230793849	0.7263987	hsa:90,ACVR1,90:up|hsa:339345,NANOS2,339345:up|hsa:3091,HIF1A,3091:up	http://amigo.geneontology.org/cgi-bin/amigo/term_details?term=GO:0048863
transmembrane receptor protein tyrosine kinase signaling pathway	Biological Process	GO:0007169	6	795	103	17517	0.058252427184466	0.0453844836444597	0.3255955638	0.7290993	hsa:55023,PHIP,55023:up|hsa:3091,HIF1A,3091:up|hsa:23263,MCF2L,23263:down|hsa:30011,SH3KBP1,30011:down|hsa:64857,PLEKHG2,64857:down|hsa:2043,EPHA4,2043:up	http://amigo.geneontology.org/cgi-bin/amigo/term_details?term=GO:0007169
positive regulation of peptide hormone secretion	Biological Process	GO:0090277	1	67	103	17517	0.00970873786407767	0.00382485585431295	0.3269067649	0.7290993	hsa:3091,HIF1A,3091:up	http://amigo.geneontology.org/cgi-bin/amigo/term_details?term=GO:0090277
associative learning	Biological Process	GO:0008306	1	67	103	17517	0.00970873786407767	0.00382485585431295	0.3269067649	0.7290993	hsa:3091,HIF1A,3091:up	http://amigo.geneontology.org/cgi-bin/amigo/term_details?term=GO:0008306
blood vessel endothelial cell migration	Biological Process	GO:0043534	1	67	103	17517	0.00970873786407767	0.00382485585431295	0.3269067649	0.7290993	hsa:154810,AMOTL1,154810:up	http://amigo.geneontology.org/cgi-bin/amigo/term_details?term=GO:0043534
positive regulation of stem cell proliferation	Biological Process	GO:2000648	1	67	103	17517	0.00970873786407767	0.00382485585431295	0.3269067649	0.7290993	hsa:3091,HIF1A,3091:up	http://amigo.geneontology.org/cgi-bin/amigo/term_details?term=GO:2000648
lymphocyte apoptotic process	Biological Process	GO:0070227	1	67	103	17517	0.00970873786407767	0.00382485585431295	0.3269067649	0.7290993	hsa:3091,HIF1A,3091:up	http://amigo.geneontology.org/cgi-bin/amigo/term_details?term=GO:0070227
negative regulation of protein modification process	Biological Process	GO:0031400	4	491	103	17517	0.0388349514563107	0.0280299137980248	0.3270157736	0.7290993	hsa:5999,RGS4,5999:down|hsa:1850,DUSP8,1850:up|hsa:58509,CACTIN,58509:up|hsa:56288,PARD3,56288:up	http://amigo.geneontology.org/cgi-bin/amigo/term_details?term=GO:0031400
cellular component morphogenesis	Biological Process	GO:0032989	9	1270	103	17517	0.087378640776699	0.0725009990295142	0.3304691371	0.7340427	hsa:55023,PHIP,55023:up|hsa:3091,HIF1A,3091:up|hsa:752,FMNL1,752:down|hsa:2043,EPHA4,2043:up|hsa:5864,RAB3A,5864:down|hsa:971,CD72,971:down|hsa:30011,SH3KBP1,30011:down|hsa:56288,PARD3,56288:up|hsa:199221,DZIP1L,199221:up	http://amigo.geneontology.org/cgi-bin/amigo/term_details?term=GO:0032989
cardiac septum development	Biological Process	GO:0003279	1	68	103	17517	0.00970873786407767	0.00388194325512359	0.3308797507	0.7340427	hsa:90,ACVR1,90:up	http://amigo.geneontology.org/cgi-bin/amigo/term_details?term=GO:0003279
learning or memory	Biological Process	GO:0007611	2	201	103	17517	0.0194174757281553	0.0114745675629389	0.3313748337	0.7340427	hsa:2821,GPI,2821:up|hsa:3091,HIF1A,3091:up	http://amigo.geneontology.org/cgi-bin/amigo/term_details?term=GO:0007611
negative regulation of protein kinase activity	Biological Process	GO:0006469	2	201	103	17517	0.0194174757281553	0.0114745675629389	0.3313748337	0.7340427	hsa:5999,RGS4,5999:down|hsa:1850,DUSP8,1850:up	http://amigo.geneontology.org/cgi-bin/amigo/term_details?term=GO:0006469
regulation of cellular protein metabolic process	Biological Process	GO:0032268	14	2072	103	17517	0.135922330097087	0.118285094479648	0.3318250627	0.7343619	hsa:5999,RGS4,5999:down|hsa:55023,PHIP,55023:up|hsa:90,ACVR1,90:up|hsa:339345,NANOS2,339345:up|hsa:1850,DUSP8,1850:up|hsa:51667,NUB1,51667:up|hsa:2043,EPHA4,2043:up|hsa:4293,MAP3K9,4293:down|hsa:2821,GPI,2821:up|hsa:56160,NDNL2,56160:up|hsa:58509,CACTIN,58509:up|hsa:9722,NOS1AP,9722:up|hsa:56288,PARD3,56288:up|hsa:5886,RAD23A,5886:down	http://amigo.geneontology.org/cgi-bin/amigo/term_details?term=GO:0032268
purine-containing compound metabolic process	Biological Process	GO:0072521	4	496	103	17517	0.0388349514563107	0.028315350802078	0.3337019688	0.7369321	hsa:2821,GPI,2821:up|hsa:4538,ND4,4538:down|hsa:3091,HIF1A,3091:up|hsa:4537,ND3,4537:up	http://amigo.geneontology.org/cgi-bin/amigo/term_details?term=GO:0072521
negative regulation of G-protein coupled receptor protein signaling pathway	Biological Process	GO:0045744	1	69	103	17517	0.00970873786407767	0.00393903065593424	0.3348295121	0.7369321	hsa:5999,RGS4,5999:down	http://amigo.geneontology.org/cgi-bin/amigo/term_details?term=GO:0045744
multicellular organismal response to stress	Biological Process	GO:0033555	1	69	103	17517	0.00970873786407767	0.00393903065593424	0.3348295121	0.7369321	hsa:64856,VWA1,64856:up	http://amigo.geneontology.org/cgi-bin/amigo/term_details?term=GO:0033555
alpha-amino acid biosynthetic process	Biological Process	GO:1901607	1	69	103	17517	0.00970873786407767	0.00393903065593424	0.3348295121	0.7369321	hsa:1373,CPS1,1373:up	http://amigo.geneontology.org/cgi-bin/amigo/term_details?term=GO:1901607
mesenchyme development	Biological Process	GO:0060485	2	203	103	17517	0.0194174757281553	0.0115887423645601	0.3356738785	0.7374374	hsa:90,ACVR1,90:up|hsa:3091,HIF1A,3091:up	http://amigo.geneontology.org/cgi-bin/amigo/term_details?term=GO:0060485
cellular modified amino acid metabolic process	Biological Process	GO:0006575	2	203	103	17517	0.0194174757281553	0.0115887423645601	0.3356738785	0.7374374	hsa:1373,CPS1,1373:up|hsa:3029,HAGH,3029:down	http://amigo.geneontology.org/cgi-bin/amigo/term_details?term=GO:0006575
positive regulation of MAP kinase activity	Biological Process	GO:0043406	2	204	103	17517	0.0194174757281553	0.0116458297653708	0.3378204881	0.7394687	hsa:2043,EPHA4,2043:up|hsa:4293,MAP3K9,4293:down	http://amigo.geneontology.org/cgi-bin/amigo/term_details?term=GO:0043406
central nervous system neuron development	Biological Process	GO:0021954	1	70	103	17517	0.00970873786407767	0.00399611805674488	0.3387561833	0.7394687	hsa:2043,EPHA4,2043:up	http://amigo.geneontology.org/cgi-bin/amigo/term_details?term=GO:0021954
ER to Golgi vesicle-mediated transport	Biological Process	GO:0006888	1	70	103	17517	0.00970873786407767	0.00399611805674488	0.3387561833	0.7394687	hsa:57222,ERGIC1,57222:down	http://amigo.geneontology.org/cgi-bin/amigo/term_details?term=GO:0006888
mesoderm morphogenesis	Biological Process	GO:0048332	1	70	103	17517	0.00970873786407767	0.00399611805674488	0.3387561833	0.7394687	hsa:90,ACVR1,90:up	http://amigo.geneontology.org/cgi-bin/amigo/term_details?term=GO:0048332
regulation of vasculature development	Biological Process	GO:1901342	2	206	103	17517	0.0194174757281553	0.0117600045669921	0.3421076267	0.7419143	hsa:10553,HTATIP2,10553:down|hsa:3091,HIF1A,3091:up	http://amigo.geneontology.org/cgi-bin/amigo/term_details?term=GO:1901342
energy derivation by oxidation of organic compounds	Biological Process	GO:0015980	3	352	103	17517	0.029126213592233	0.0200947650853457	0.3424210028	0.7419143	hsa:1373,CPS1,1373:up|hsa:4538,ND4,4538:down|hsa:4537,ND3,4537:up	http://amigo.geneontology.org/cgi-bin/amigo/term_details?term=GO:0015980
regulated secretory pathway	Biological Process	GO:0045055	1	71	103	17517	0.00970873786407767	0.00405320545755552	0.3426598982	0.7419143	hsa:5864,RAB3A,5864:down	http://amigo.geneontology.org/cgi-bin/amigo/term_details?term=GO:0045055
regulation of epidermal growth factor receptor signaling pathway	Biological Process	GO:0042058	1	71	103	17517	0.00970873786407767	0.00405320545755552	0.3426598982	0.7419143	hsa:30011,SH3KBP1,30011:down	http://amigo.geneontology.org/cgi-bin/amigo/term_details?term=GO:0042058
negative regulation of developmental growth	Biological Process	GO:0048640	1	71	103	17517	0.00970873786407767	0.00405320545755552	0.3426598982	0.7419143	hsa:55841,WWC3,55841:up	http://amigo.geneontology.org/cgi-bin/amigo/term_details?term=GO:0048640
positive regulation of peptide secretion	Biological Process	GO:0002793	1	71	103	17517	0.00970873786407767	0.00405320545755552	0.3426598982	0.7419143	hsa:3091,HIF1A,3091:up	http://amigo.geneontology.org/cgi-bin/amigo/term_details?term=GO:0002793
membrane docking	Biological Process	GO:0022406	1	71	103	17517	0.00970873786407767	0.00405320545755552	0.3426598982	0.7419143	hsa:5864,RAB3A,5864:down	http://amigo.geneontology.org/cgi-bin/amigo/term_details?term=GO:0022406
cellular catabolic process	Biological Process	GO:0044248	11	1605	103	17517	0.106796116504854	0.091625278301079	0.3431980076	0.7424094	hsa:6202,RPS8,6202:down|hsa:6187,RPS2,6187:down|hsa:1373,CPS1,1373:up|hsa:339345,NANOS2,339345:up|hsa:6161,RPL32,6161:down|hsa:3091,HIF1A,3091:up|hsa:51667,NUB1,51667:up|hsa:6143,RPL19,6143:down|hsa:26019,UPF2,26019:up|hsa:2821,GPI,2821:up|hsa:5886,RAD23A,5886:down	http://amigo.geneontology.org/cgi-bin/amigo/term_details?term=GO:0044248
cell-cell junction organization	Biological Process	GO:0045216	2	208	103	17517	0.0194174757281553	0.0118741793686133	0.3463863256	0.7462759	hsa:153562,MARVELD2,153562:down|hsa:56288,PARD3,56288:up	http://amigo.geneontology.org/cgi-bin/amigo/term_details?term=GO:0045216
regulation of protein modification process	Biological Process	GO:0031399	10	1452	103	17517	0.0970873786407767	0.0828909059770509	0.3489724419	0.7480287	hsa:5999,RGS4,5999:down|hsa:55023,PHIP,55023:up|hsa:90,ACVR1,90:up|hsa:1850,DUSP8,1850:up|hsa:2043,EPHA4,2043:up|hsa:4293,MAP3K9,4293:down|hsa:56160,NDNL2,56160:up|hsa:58509,CACTIN,58509:up|hsa:56288,PARD3,56288:up|hsa:9722,NOS1AP,9722:up	http://amigo.geneontology.org/cgi-bin/amigo/term_details?term=GO:0031399
nucleobase-containing compound biosynthetic process	Biological Process	GO:0034654	25	3904	103	17517	0.242718446601942	0.222869212764743	0.3500176102	0.7480287	hsa:6202,RPS8,6202:down|hsa:55841,WWC3,55841:up|hsa:6187,RPS2,6187:down|hsa:55023,PHIP,55023:up|hsa:90,ACVR1,90:up|hsa:115004,MB21D1,115004:down|hsa:55279,ZNF654,55279:up|hsa:4291,MLF1,4291:up|hsa:10978,CLP1,10978:up|hsa:2274,FHL2,2274:up|hsa:10553,HTATIP2,10553:down|hsa:54925,ZSCAN32,54925:up|hsa:58509,CACTIN,58509:up|hsa:653619,PRAMEF15,653619:up|hsa:6161,RPL32,6161:down|hsa:3091,HIF1A,3091:up|…	http://amigo.geneontology.org/cgi-bin/amigo/term_details?term=GO:0034654
regulation of gliogenesis	Biological Process	GO:0014013	1	73	103	17517	0.00970873786407767	0.0041673802591768	0.3503989895	0.7480287	hsa:2043,EPHA4,2043:up	http://amigo.geneontology.org/cgi-bin/amigo/term_details?term=GO:0014013
mRNA-containing ribonucleoprotein complex export from nucleus	Biological Process	GO:0071427	1	73	103	17517	0.00970873786407767	0.0041673802591768	0.3503989895	0.7480287	hsa:26019,UPF2,26019:up	http://amigo.geneontology.org/cgi-bin/amigo/term_details?term=GO:0071427
mRNA export from nucleus	Biological Process	GO:0006406	1	73	103	17517	0.00970873786407767	0.0041673802591768	0.3503989895	0.7480287	hsa:26019,UPF2,26019:up	http://amigo.geneontology.org/cgi-bin/amigo/term_details?term=GO:0006406
regulation of neural precursor cell proliferation	Biological Process	GO:2000177	1	73	103	17517	0.00970873786407767	0.0041673802591768	0.3503989895	0.7480287	hsa:3091,HIF1A,3091:up	http://amigo.geneontology.org/cgi-bin/amigo/term_details?term=GO:2000177
regulation of cation channel activity	Biological Process	GO:2001257	1	73	103	17517	0.00970873786407767	0.0041673802591768	0.3503989895	0.7480287	hsa:9722,NOS1AP,9722:up	http://amigo.geneontology.org/cgi-bin/amigo/term_details?term=GO:2001257
mammary gland epithelium development	Biological Process	GO:0061180	1	73	103	17517	0.00970873786407767	0.0041673802591768	0.3503989895	0.7480287	hsa:3091,HIF1A,3091:up	http://amigo.geneontology.org/cgi-bin/amigo/term_details?term=GO:0061180
organelle localization	Biological Process	GO:0051640	3	357	103	17517	0.029126213592233	0.0203802020893989	0.3504728004	0.7480287	hsa:199953,TMEM201,199953:down|hsa:56288,PARD3,56288:up|hsa:5864,RAB3A,5864:down	http://amigo.geneontology.org/cgi-bin/amigo/term_details?term=GO:0051640
ossification	Biological Process	GO:0001503	3	357	103	17517	0.029126213592233	0.0203802020893989	0.3504728004	0.7480287	hsa:90,ACVR1,90:up|hsa:3091,HIF1A,3091:up|hsa:2274,FHL2,2274:up	http://amigo.geneontology.org/cgi-bin/amigo/term_details?term=GO:0001503
neuron apoptotic process	Biological Process	GO:0051402	2	211	103	17517	0.0194174757281553	0.0120454415710453	0.3527876998	0.7500520	hsa:2821,GPI,2821:up|hsa:3091,HIF1A,3091:up	http://amigo.geneontology.org/cgi-bin/amigo/term_details?term=GO:0051402
negative regulation of cellular protein metabolic process	Biological Process	GO:0032269	6	821	103	17517	0.058252427184466	0.0468687560655363	0.3529141555	0.7500520	hsa:5999,RGS4,5999:down|hsa:2821,GPI,2821:up|hsa:339345,NANOS2,339345:up|hsa:1850,DUSP8,1850:up|hsa:58509,CACTIN,58509:up|hsa:56288,PARD3,56288:up	http://amigo.geneontology.org/cgi-bin/amigo/term_details?term=GO:0032269
nucleobase-containing small molecule metabolic process	Biological Process	GO:0055086	5	665	103	17517	0.0485436893203883	0.0379631215390763	0.3531824071	0.7500520	hsa:2821,GPI,2821:up|hsa:4538,ND4,4538:down|hsa:3091,HIF1A,3091:up|hsa:115004,MB21D1,115004:down|hsa:4537,ND3,4537:up	http://amigo.geneontology.org/cgi-bin/amigo/term_details?term=GO:0055086
RNA splicing	Biological Process	GO:0008380	3	359	103	17517	0.029126213592233	0.0204943768910202	0.3536911496	0.7500520	hsa:58509,CACTIN,58509:up|hsa:79650,USB1,79650:up|hsa:10978,CLP1,10978:up	http://amigo.geneontology.org/cgi-bin/amigo/term_details?term=GO:0008380
regulation of organ growth	Biological Process	GO:0046620	1	74	103	17517	0.00970873786407767	0.00422446765998744	0.3542346295	0.7500520	hsa:55841,WWC3,55841:up	http://amigo.geneontology.org/cgi-bin/amigo/term_details?term=GO:0046620
regulation of generation of precursor metabolites and energy	Biological Process	GO:0043467	1	74	103	17517	0.00970873786407767	0.00422446765998744	0.3542346295	0.7500520	hsa:3091,HIF1A,3091:up	http://amigo.geneontology.org/cgi-bin/amigo/term_details?term=GO:0043467
regulation of ERBB signaling pathway	Biological Process	GO:1901184	1	74	103	17517	0.00970873786407767	0.00422446765998744	0.3542346295	0.7500520	hsa:30011,SH3KBP1,30011:down	http://amigo.geneontology.org/cgi-bin/amigo/term_details?term=GO:1901184
protein autophosphorylation	Biological Process	GO:0046777	2	213	103	17517	0.0194174757281553	0.0121596163726666	0.3570436164	0.7514932	hsa:2043,EPHA4,2043:up|hsa:4293,MAP3K9,4293:down	http://amigo.geneontology.org/cgi-bin/amigo/term_details?term=GO:0046777
cell junction assembly	Biological Process	GO:0034329	2	213	103	17517	0.0194174757281553	0.0121596163726666	0.3570436164	0.7514932	hsa:153562,MARVELD2,153562:down|hsa:56288,PARD3,56288:up	http://amigo.geneontology.org/cgi-bin/amigo/term_details?term=GO:0034329
reactive oxygen species biosynthetic process	Biological Process	GO:1903409	1	75	103	17517	0.00970873786407767	0.00428155506079808	0.3580478402	0.7514932	hsa:9722,NOS1AP,9722:up	http://amigo.geneontology.org/cgi-bin/amigo/term_details?term=GO:1903409
negative regulation of cysteine-type endopeptidase activity involved in apoptotic process	Biological Process	GO:0043154	1	75	103	17517	0.00970873786407767	0.00428155506079808	0.3580478402	0.7514932	hsa:2821,GPI,2821:up	http://amigo.geneontology.org/cgi-bin/amigo/term_details?term=GO:0043154
regulation of fibroblast proliferation	Biological Process	GO:0048145	1	75	103	17517	0.00970873786407767	0.00428155506079808	0.3580478402	0.7514932	hsa:2495,FTH1,2495:down	http://amigo.geneontology.org/cgi-bin/amigo/term_details?term=GO:0048145
leukocyte homeostasis	Biological Process	GO:0001776	1	75	103	17517	0.00970873786407767	0.00428155506079808	0.3580478402	0.7514932	hsa:3091,HIF1A,3091:up	http://amigo.geneontology.org/cgi-bin/amigo/term_details?term=GO:0001776
positive regulation of reactive oxygen species metabolic process	Biological Process	GO:2000379	1	75	103	17517	0.00970873786407767	0.00428155506079808	0.3580478402	0.7514932	hsa:9722,NOS1AP,9722:up	http://amigo.geneontology.org/cgi-bin/amigo/term_details?term=GO:2000379
antigen processing and presentation of exogenous peptide antigen via MHC class I, TAP-dependent	Biological Process	GO:0002479	1	75	103	17517	0.00970873786407767	0.00428155506079808	0.3580478402	0.7514932	hsa:6892,TAPBP,6892:up	http://amigo.geneontology.org/cgi-bin/amigo/term_details?term=GO:0002479
vesicle fusion	Biological Process	GO:0006906	1	75	103	17517	0.00970873786407767	0.00428155506079808	0.3580478402	0.7514932	hsa:5864,RAB3A,5864:down	http://amigo.geneontology.org/cgi-bin/amigo/term_details?term=GO:0006906
protein localization to organelle	Biological Process	GO:0033365	5	670	103	17517	0.0485436893203883	0.0382485585431295	0.3590490988	0.7522107	hsa:6202,RPS8,6202:down|hsa:6143,RPL19,6143:down|hsa:6187,RPS2,6187:down|hsa:55023,PHIP,55023:up|hsa:6161,RPL32,6161:down	http://amigo.geneontology.org/cgi-bin/amigo/term_details?term=GO:0033365
negative regulation of kinase activity	Biological Process	GO:0033673	2	215	103	17517	0.0194174757281553	0.0122737911742878	0.3612897731	0.7522107	hsa:5999,RGS4,5999:down|hsa:1850,DUSP8,1850:up	http://amigo.geneontology.org/cgi-bin/amigo/term_details?term=GO:0033673
regulation of cardiac muscle contraction	Biological Process	GO:0055117	1	76	103	17517	0.00970873786407767	0.00433864246160872	0.3618387513	0.7522107	hsa:9722,NOS1AP,9722:up	http://amigo.geneontology.org/cgi-bin/amigo/term_details?term=GO:0055117
cellular response to type I interferon	Biological Process	GO:0071357	1	76	103	17517	0.00970873786407767	0.00433864246160872	0.3618387513	0.7522107	hsa:58509,CACTIN,58509:up	http://amigo.geneontology.org/cgi-bin/amigo/term_details?term=GO:0071357
type I interferon signaling pathway	Biological Process	GO:0060337	1	76	103	17517	0.00970873786407767	0.00433864246160872	0.3618387513	0.7522107	hsa:58509,CACTIN,58509:up	http://amigo.geneontology.org/cgi-bin/amigo/term_details?term=GO:0060337
regulation of leukocyte apoptotic process	Biological Process	GO:2000106	1	76	103	17517	0.00970873786407767	0.00433864246160872	0.3618387513	0.7522107	hsa:3091,HIF1A,3091:up	http://amigo.geneontology.org/cgi-bin/amigo/term_details?term=GO:2000106
positive regulation of type I interferon production	Biological Process	GO:0032481	1	76	103	17517	0.00970873786407767	0.00433864246160872	0.3618387513	0.7522107	hsa:115004,MB21D1,115004:down	http://amigo.geneontology.org/cgi-bin/amigo/term_details?term=GO:0032481
in utero embryonic development	Biological Process	GO:0001701	3	365	103	17517	0.029126213592233	0.020836901295884	0.3633354025	0.7535158	hsa:90,ACVR1,90:up|hsa:3091,HIF1A,3091:up|hsa:2709,GJB5,2709:down	http://amigo.geneontology.org/cgi-bin/amigo/term_details?term=GO:0001701
positive regulation of myeloid cell differentiation	Biological Process	GO:0045639	1	77	103	17517	0.00970873786407767	0.00439572986241936	0.3656074921	0.7535158	hsa:3091,HIF1A,3091:up	http://amigo.geneontology.org/cgi-bin/amigo/term_details?term=GO:0045639
response to type I interferon	Biological Process	GO:0034340	1	77	103	17517	0.00970873786407767	0.00439572986241936	0.3656074921	0.7535158	hsa:58509,CACTIN,58509:up	http://amigo.geneontology.org/cgi-bin/amigo/term_details?term=GO:0034340
negative regulation of cysteine-type endopeptidase activity	Biological Process	GO:2000117	1	77	103	17517	0.00970873786407767	0.00439572986241936	0.3656074921	0.7535158	hsa:2821,GPI,2821:up	http://amigo.geneontology.org/cgi-bin/amigo/term_details?term=GO:2000117
positive regulation of blood circulation	Biological Process	GO:1903524	1	77	103	17517	0.00970873786407767	0.00439572986241936	0.3656074921	0.7535158	hsa:1373,CPS1,1373:up	http://amigo.geneontology.org/cgi-bin/amigo/term_details?term=GO:1903524
establishment of localization in cell	Biological Process	GO:0051649	15	2289	103	17517	0.145631067961165	0.130673060455557	0.3679489074	0.7545075	hsa:6202,RPS8,6202:down|hsa:6892,TAPBP,6892:up|hsa:6187,RPS2,6187:down|hsa:57222,ERGIC1,57222:down|hsa:55023,PHIP,55023:up|hsa:6161,RPL32,6161:down|hsa:3091,HIF1A,3091:up|hsa:5864,RAB3A,5864:down|hsa:10553,HTATIP2,10553:down|hsa:6143,RPL19,6143:down|hsa:26019,UPF2,26019:up|hsa:2495,FTH1,2495:down|hsa:199953,TMEM201,199953:down|hsa:56288,PARD3,56288:up|hsa:8548,BLZF1,8548:up	http://amigo.geneontology.org/cgi-bin/amigo/term_details?term=GO:0051649
regulation of apoptotic signaling pathway	Biological Process	GO:2001233	3	368	103	17517	0.029126213592233	0.0210081634983159	0.3681502181	0.7545075	hsa:55023,PHIP,55023:up|hsa:90,ACVR1,90:up|hsa:3091,HIF1A,3091:up	http://amigo.geneontology.org/cgi-bin/amigo/term_details?term=GO:2001233
negative regulation of cell division	Biological Process	GO:0051782	1	78	103	17517	0.00970873786407767	0.00445281726323001	0.3693541910	0.7545075	hsa:339345,NANOS2,339345:up	http://amigo.geneontology.org/cgi-bin/amigo/term_details?term=GO:0051782
dicarboxylic acid transport	Biological Process	GO:0006835	1	78	103	17517	0.00970873786407767	0.00445281726323001	0.3693541910	0.7545075	hsa:5864,RAB3A,5864:down	http://amigo.geneontology.org/cgi-bin/amigo/term_details?term=GO:0006835
fibroblast proliferation	Biological Process	GO:0048144	1	78	103	17517	0.00970873786407767	0.00445281726323001	0.3693541910	0.7545075	hsa:2495,FTH1,2495:down	http://amigo.geneontology.org/cgi-bin/amigo/term_details?term=GO:0048144
positive regulation of ion transmembrane transport	Biological Process	GO:0034767	1	78	103	17517	0.00970873786407767	0.00445281726323001	0.3693541910	0.7545075	hsa:9722,NOS1AP,9722:up	http://amigo.geneontology.org/cgi-bin/amigo/term_details?term=GO:0034767
cellular response to glucose stimulus	Biological Process	GO:0071333	1	78	103	17517	0.00970873786407767	0.00445281726323001	0.3693541910	0.7545075	hsa:3091,HIF1A,3091:up	http://amigo.geneontology.org/cgi-bin/amigo/term_details?term=GO:0071333
reactive oxygen species metabolic process	Biological Process	GO:0072593	2	219	103	17517	0.0194174757281553	0.0125021407775304	0.3697513954	0.7545075	hsa:1373,CPS1,1373:up|hsa:9722,NOS1AP,9722:up	http://amigo.geneontology.org/cgi-bin/amigo/term_details?term=GO:0072593
positive regulation of innate immune response	Biological Process	GO:0045089	2	220	103	17517	0.0194174757281553	0.012559228178341	0.3718601576	0.7545075	hsa:115004,MB21D1,115004:down|hsa:58509,CACTIN,58509:up	http://amigo.geneontology.org/cgi-bin/amigo/term_details?term=GO:0045089
regulation of blood circulation	Biological Process	GO:1903522	2	220	103	17517	0.0194174757281553	0.012559228178341	0.3718601576	0.7545075	hsa:1373,CPS1,1373:up|hsa:9722,NOS1AP,9722:up	http://amigo.geneontology.org/cgi-bin/amigo/term_details?term=GO:1903522
organelle membrane fusion	Biological Process	GO:0090174	1	79	103	17517	0.00970873786407767	0.00450990466404065	0.3730789756	0.7545075	hsa:5864,RAB3A,5864:down	http://amigo.geneontology.org/cgi-bin/amigo/term_details?term=GO:0090174
antigen processing and presentation of exogenous peptide antigen via MHC class I	Biological Process	GO:0042590	1	79	103	17517	0.00970873786407767	0.00450990466404065	0.3730789756	0.7545075	hsa:6892,TAPBP,6892:up	http://amigo.geneontology.org/cgi-bin/amigo/term_details?term=GO:0042590
nucleotide-excision repair	Biological Process	GO:0006289	1	79	103	17517	0.00970873786407767	0.00450990466404065	0.3730789756	0.7545075	hsa:5886,RAD23A,5886:down	http://amigo.geneontology.org/cgi-bin/amigo/term_details?term=GO:0006289
secretion by tissue	Biological Process	GO:0032941	1	79	103	17517	0.00970873786407767	0.00450990466404065	0.3730789756	0.7545075	hsa:3091,HIF1A,3091:up	http://amigo.geneontology.org/cgi-bin/amigo/term_details?term=GO:0032941
glycogen metabolic process	Biological Process	GO:0005977	1	79	103	17517	0.00970873786407767	0.00450990466404065	0.3730789756	0.7545075	hsa:1373,CPS1,1373:up	http://amigo.geneontology.org/cgi-bin/amigo/term_details?term=GO:0005977
negative regulation of growth	Biological Process	GO:0045926	2	221	103	17517	0.0194174757281553	0.0126163155791517	0.3739661792	0.7545075	hsa:55841,WWC3,55841:up|hsa:3091,HIF1A,3091:up	http://amigo.geneontology.org/cgi-bin/amigo/term_details?term=GO:0045926
developmental maturation	Biological Process	GO:0021700	2	221	103	17517	0.0194174757281553	0.0126163155791517	0.3739661792	0.7545075	hsa:3091,HIF1A,3091:up|hsa:5864,RAB3A,5864:down	http://amigo.geneontology.org/cgi-bin/amigo/term_details?term=GO:0021700
cellular response to transforming growth factor beta stimulus	Biological Process	GO:0071560	2	222	103	17517	0.0194174757281553	0.0126734029799623	0.3760694196	0.7545075	hsa:90,ACVR1,90:up|hsa:56288,PARD3,56288:up	http://amigo.geneontology.org/cgi-bin/amigo/term_details?term=GO:0071560
response to transforming growth factor beta	Biological Process	GO:0071559	2	222	103	17517	0.0194174757281553	0.0126734029799623	0.3760694196	0.7545075	hsa:90,ACVR1,90:up|hsa:56288,PARD3,56288:up	http://amigo.geneontology.org/cgi-bin/amigo/term_details?term=GO:0071559
neurological system process	Biological Process	GO:0050877	8	1163	103	17517	0.0776699029126214	0.0663926471427756	0.3762252617	0.7545075	hsa:3091,HIF1A,3091:up|hsa:153562,MARVELD2,153562:down|hsa:390036,OR52K1,390036:up|hsa:54084,TSPEAR,54084:up|hsa:5864,RAB3A,5864:down|hsa:2821,GPI,2821:up|hsa:81168,OR8J3,81168:up|hsa:56288,PARD3,56288:up	http://amigo.geneontology.org/cgi-bin/amigo/term_details?term=GO:0050877
signal transduction by protein phosphorylation	Biological Process	GO:0023014	5	685	103	17517	0.0485436893203883	0.0391048695552891	0.3766708964	0.7545075	hsa:5999,RGS4,5999:down|hsa:90,ACVR1,90:up|hsa:1850,DUSP8,1850:up|hsa:2043,EPHA4,2043:up|hsa:4293,MAP3K9,4293:down	http://amigo.geneontology.org/cgi-bin/amigo/term_details?term=GO:0023014
glucan metabolic process	Biological Process	GO:0044042	1	80	103	17517	0.00970873786407767	0.00456699206485129	0.3767819728	0.7545075	hsa:1373,CPS1,1373:up	http://amigo.geneontology.org/cgi-bin/amigo/term_details?term=GO:0044042
cellular glucan metabolic process	Biological Process	GO:0006073	1	80	103	17517	0.00970873786407767	0.00456699206485129	0.3767819728	0.7545075	hsa:1373,CPS1,1373:up	http://amigo.geneontology.org/cgi-bin/amigo/term_details?term=GO:0006073
Golgi organization	Biological Process	GO:0007030	1	80	103	17517	0.00970873786407767	0.00456699206485129	0.3767819728	0.7545075	hsa:8548,BLZF1,8548:up	http://amigo.geneontology.org/cgi-bin/amigo/term_details?term=GO:0007030
cellular response to hexose stimulus	Biological Process	GO:0071331	1	80	103	17517	0.00970873786407767	0.00456699206485129	0.3767819728	0.7545075	hsa:3091,HIF1A,3091:up	http://amigo.geneontology.org/cgi-bin/amigo/term_details?term=GO:0071331
regulation of heart rate	Biological Process	GO:0002027	1	80	103	17517	0.00970873786407767	0.00456699206485129	0.3767819728	0.7545075	hsa:9722,NOS1AP,9722:up	http://amigo.geneontology.org/cgi-bin/amigo/term_details?term=GO:0002027
gluconeogenesis	Biological Process	GO:0006094	1	80	103	17517	0.00970873786407767	0.00456699206485129	0.3767819728	0.7545075	hsa:2821,GPI,2821:up	http://amigo.geneontology.org/cgi-bin/amigo/term_details?term=GO:0006094
cellular amino acid biosynthetic process	Biological Process	GO:0008652	1	80	103	17517	0.00970873786407767	0.00456699206485129	0.3767819728	0.7545075	hsa:1373,CPS1,1373:up	http://amigo.geneontology.org/cgi-bin/amigo/term_details?term=GO:0008652
regulation of protein phosphorylation	Biological Process	GO:0001932	8	1165	103	17517	0.0776699029126214	0.0665068219443969	0.3780390879	0.7553950	hsa:5999,RGS4,5999:down|hsa:55023,PHIP,55023:up|hsa:90,ACVR1,90:up|hsa:1850,DUSP8,1850:up|hsa:2043,EPHA4,2043:up|hsa:4293,MAP3K9,4293:down|hsa:58509,CACTIN,58509:up|hsa:56288,PARD3,56288:up	http://amigo.geneontology.org/cgi-bin/amigo/term_details?term=GO:0001932
negative regulation of response to external stimulus	Biological Process	GO:0032102	2	223	103	17517	0.0194174757281553	0.012730490380773	0.3781698388	0.7553950	hsa:58509,CACTIN,58509:up|hsa:2043,EPHA4,2043:up	http://amigo.geneontology.org/cgi-bin/amigo/term_details?term=GO:0032102
regulation of small GTPase mediated signal transduction	Biological Process	GO:0051056	3	375	103	17517	0.029126213592233	0.0214077753039904	0.3793612957	0.7561984	hsa:5999,RGS4,5999:down|hsa:23263,MCF2L,23263:down|hsa:64857,PLEKHG2,64857:down	http://amigo.geneontology.org/cgi-bin/amigo/term_details?term=GO:0051056
extrinsic apoptotic signaling pathway	Biological Process	GO:0097191	2	224	103	17517	0.0194174757281553	0.0127875777815836	0.3802673972	0.7561984	hsa:55023,PHIP,55023:up|hsa:90,ACVR1,90:up	http://amigo.geneontology.org/cgi-bin/amigo/term_details?term=GO:0097191
cellular response to monosaccharide stimulus	Biological Process	GO:0071326	1	81	103	17517	0.00970873786407767	0.00462407946566193	0.3804633089	0.7561984	hsa:3091,HIF1A,3091:up	http://amigo.geneontology.org/cgi-bin/amigo/term_details?term=GO:0071326
regulation of tumor necrosis factor production	Biological Process	GO:0032680	1	81	103	17517	0.00970873786407767	0.00462407946566193	0.3804633089	0.7561984	hsa:58509,CACTIN,58509:up	http://amigo.geneontology.org/cgi-bin/amigo/term_details?term=GO:0032680
negative regulation of translation	Biological Process	GO:0017148	1	81	103	17517	0.00970873786407767	0.00462407946566193	0.3804633089	0.7561984	hsa:339345,NANOS2,339345:up	http://amigo.geneontology.org/cgi-bin/amigo/term_details?term=GO:0017148
regulation of defense response to virus	Biological Process	GO:0050688	1	81	103	17517	0.00970873786407767	0.00462407946566193	0.3804633089	0.7561984	hsa:115004,MB21D1,115004:down	http://amigo.geneontology.org/cgi-bin/amigo/term_details?term=GO:0050688
RNA export from nucleus	Biological Process	GO:0006405	1	82	103	17517	0.00970873786407767	0.00468116686647257	0.3841231092	0.7596961	hsa:26019,UPF2,26019:up	http://amigo.geneontology.org/cgi-bin/amigo/term_details?term=GO:0006405
tumor necrosis factor production	Biological Process	GO:0032640	1	82	103	17517	0.00970873786407767	0.00468116686647257	0.3841231092	0.7596961	hsa:58509,CACTIN,58509:up	http://amigo.geneontology.org/cgi-bin/amigo/term_details?term=GO:0032640
ribonucleoprotein complex export from nucleus	Biological Process	GO:0071426	1	82	103	17517	0.00970873786407767	0.00468116686647257	0.3841231092	0.7596961	hsa:26019,UPF2,26019:up	http://amigo.geneontology.org/cgi-bin/amigo/term_details?term=GO:0071426
positive regulation of cell cycle process	Biological Process	GO:0090068	2	226	103	17517	0.0194174757281553	0.0129017525832049	0.3844537767	0.7597237	hsa:55023,PHIP,55023:up|hsa:10397,NDRG1,10397:up	http://amigo.geneontology.org/cgi-bin/amigo/term_details?term=GO:0090068
heterocycle biosynthetic process	Biological Process	GO:0018130	25	3971	103	17517	0.242718446601942	0.226694068619056	0.3855015754	0.7610323	hsa:6202,RPS8,6202:down|hsa:55841,WWC3,55841:up|hsa:6187,RPS2,6187:down|hsa:55023,PHIP,55023:up|hsa:90,ACVR1,90:up|hsa:115004,MB21D1,115004:down|hsa:55279,ZNF654,55279:up|hsa:4291,MLF1,4291:up|hsa:10978,CLP1,10978:up|hsa:2274,FHL2,2274:up|hsa:10553,HTATIP2,10553:down|hsa:54925,ZSCAN32,54925:up|hsa:58509,CACTIN,58509:up|hsa:653619,PRAMEF15,653619:up|hsa:6161,RPL32,6161:down|hsa:3091,HIF1A,3091:up|…	http://amigo.geneontology.org/cgi-bin/amigo/term_details?term=GO:0018130
RNA phosphodiester bond hydrolysis	Biological Process	GO:0090501	1	83	103	17517	0.00970873786407767	0.00473825426728321	0.3877614987	0.7624917	hsa:79650,USB1,79650:up	http://amigo.geneontology.org/cgi-bin/amigo/term_details?term=GO:0090501
positive regulation of ossification	Biological Process	GO:0045778	1	83	103	17517	0.00970873786407767	0.00473825426728321	0.3877614987	0.7624917	hsa:90,ACVR1,90:up	http://amigo.geneontology.org/cgi-bin/amigo/term_details?term=GO:0045778
adult locomotory behavior	Biological Process	GO:0008344	1	83	103	17517	0.00970873786407767	0.00473825426728321	0.3877614987	0.7624917	hsa:2043,EPHA4,2043:up	http://amigo.geneontology.org/cgi-bin/amigo/term_details?term=GO:0008344
aromatic compound biosynthetic process	Biological Process	GO:0019438	25	3976	103	17517	0.242718446601942	0.226979505623109	0.3881810321	0.7626915	hsa:6202,RPS8,6202:down|hsa:55841,WWC3,55841:up|hsa:6187,RPS2,6187:down|hsa:55023,PHIP,55023:up|hsa:90,ACVR1,90:up|hsa:115004,MB21D1,115004:down|hsa:55279,ZNF654,55279:up|hsa:4291,MLF1,4291:up|hsa:10978,CLP1,10978:up|hsa:2274,FHL2,2274:up|hsa:10553,HTATIP2,10553:down|hsa:54925,ZSCAN32,54925:up|hsa:58509,CACTIN,58509:up|hsa:653619,PRAMEF15,653619:up|hsa:6161,RPL32,6161:down|hsa:3091,HIF1A,3091:up|…	http://amigo.geneontology.org/cgi-bin/amigo/term_details?term=GO:0019438
response to amino acid	Biological Process	GO:0043200	1	84	103	17517	0.00970873786407767	0.00479534166809385	0.3913786012	0.7643573	hsa:1373,CPS1,1373:up	http://amigo.geneontology.org/cgi-bin/amigo/term_details?term=GO:0043200
positive regulation of transmembrane transport	Biological Process	GO:0034764	1	84	103	17517	0.00970873786407767	0.00479534166809385	0.3913786012	0.7643573	hsa:9722,NOS1AP,9722:up	http://amigo.geneontology.org/cgi-bin/amigo/term_details?term=GO:0034764
regulation of tumor necrosis factor superfamily cytokine production	Biological Process	GO:1903555	1	84	103	17517	0.00970873786407767	0.00479534166809385	0.3913786012	0.7643573	hsa:58509,CACTIN,58509:up	http://amigo.geneontology.org/cgi-bin/amigo/term_details?term=GO:1903555
positive regulation of peptidyl-serine phosphorylation	Biological Process	GO:0033138	1	84	103	17517	0.00970873786407767	0.00479534166809385	0.3913786012	0.7643573	hsa:55023,PHIP,55023:up	http://amigo.geneontology.org/cgi-bin/amigo/term_details?term=GO:0033138
viral genome replication	Biological Process	GO:0019079	1	84	103	17517	0.00970873786407767	0.00479534166809385	0.3913786012	0.7643573	hsa:5886,RAD23A,5886:down	http://amigo.geneontology.org/cgi-bin/amigo/term_details?term=GO:0019079
ribonucleoprotein complex localization	Biological Process	GO:0071166	1	84	103	17517	0.00970873786407767	0.00479534166809385	0.3913786012	0.7643573	hsa:26019,UPF2,26019:up	http://amigo.geneontology.org/cgi-bin/amigo/term_details?term=GO:0071166
hexose biosynthetic process	Biological Process	GO:0019319	1	84	103	17517	0.00970873786407767	0.00479534166809385	0.3913786012	0.7643573	hsa:2821,GPI,2821:up	http://amigo.geneontology.org/cgi-bin/amigo/term_details?term=GO:0019319
organic cyclic compound metabolic process	Biological Process	GO:1901360	35	5655	103	17517	0.339805825242718	0.322829251584175	0.3915777985	0.7643573	hsa:6202,RPS8,6202:down|hsa:6187,RPS2,6187:down|hsa:90,ACVR1,90:up|hsa:4291,MLF1,4291:up|hsa:10978,CLP1,10978:up|hsa:54925,ZSCAN32,54925:up|hsa:653619,PRAMEF15,653619:up|hsa:79650,USB1,79650:up|hsa:5886,RAD23A,5886:down|hsa:339559,ZFP69,339559:up|hsa:23263,MCF2L,23263:down|hsa:4293,MAP3K9,4293:down|hsa:6143,RPL19,6143:down|hsa:26019,UPF2,26019:up|hsa:79816,TLE6,79816:down|hsa:55841,WWC3,55841:up|…	http://amigo.geneontology.org/cgi-bin/amigo/term_details?term=GO:1901360
plasma membrane organization	Biological Process	GO:0007009	2	230	103	17517	0.0194174757281553	0.0131301021864475	0.3927905301	0.7647651	hsa:10397,NDRG1,10397:up|hsa:8548,BLZF1,8548:up	http://amigo.geneontology.org/cgi-bin/amigo/term_details?term=GO:0007009
regulation of neuron death	Biological Process	GO:1901214	2	230	103	17517	0.0194174757281553	0.0131301021864475	0.3927905301	0.7647651	hsa:2821,GPI,2821:up|hsa:3091,HIF1A,3091:up	http://amigo.geneontology.org/cgi-bin/amigo/term_details?term=GO:1901214
cognition	Biological Process	GO:0050890	2	230	103	17517	0.0194174757281553	0.0131301021864475	0.3927905301	0.7647651	hsa:2821,GPI,2821:up|hsa:3091,HIF1A,3091:up	http://amigo.geneontology.org/cgi-bin/amigo/term_details?term=GO:0050890
positive regulation of cell development	Biological Process	GO:0010720	3	384	103	17517	0.029126213592233	0.0219215619112862	0.3937165770	0.7647651	hsa:3091,HIF1A,3091:up|hsa:79816,TLE6,79816:down|hsa:2043,EPHA4,2043:up	http://amigo.geneontology.org/cgi-bin/amigo/term_details?term=GO:0010720
negative regulation of intrinsic apoptotic signaling pathway	Biological Process	GO:2001243	1	85	103	17517	0.00970873786407767	0.00485242906890449	0.3949745402	0.7647651	hsa:3091,HIF1A,3091:up	http://amigo.geneontology.org/cgi-bin/amigo/term_details?term=GO:2001243
regulation of striated muscle contraction	Biological Process	GO:0006942	1	85	103	17517	0.00970873786407767	0.00485242906890449	0.3949745402	0.7647651	hsa:9722,NOS1AP,9722:up	http://amigo.geneontology.org/cgi-bin/amigo/term_details?term=GO:0006942
DNA recombination	Biological Process	GO:0006310	2	233	103	17517	0.0194174757281553	0.0133013643888794	0.3990104440	0.7713345	hsa:56160,NDNL2,56160:up|hsa:197342,EME2,197342:up	http://amigo.geneontology.org/cgi-bin/amigo/term_details?term=GO:0006310
striated muscle cell differentiation	Biological Process	GO:0051146	2	233	103	17517	0.0194174757281553	0.0133013643888794	0.3990104440	0.7713345	hsa:90,ACVR1,90:up|hsa:2274,FHL2,2274:up	http://amigo.geneontology.org/cgi-bin/amigo/term_details?term=GO:0051146
positive regulation of apoptotic process	Biological Process	GO:0043065	4	547	103	17517	0.0388349514563107	0.0312268082434207	0.4019953729	0.7748161	hsa:23567,ZNF346,23567:up|hsa:23263,MCF2L,23263:down|hsa:64857,PLEKHG2,64857:down|hsa:4293,MAP3K9,4293:down	http://amigo.geneontology.org/cgi-bin/amigo/term_details?term=GO:0043065
tumor necrosis factor superfamily cytokine production	Biological Process	GO:0071706	1	87	103	17517	0.00970873786407767	0.00496660387052577	0.4021034172	0.7748161	hsa:58509,CACTIN,58509:up	http://amigo.geneontology.org/cgi-bin/amigo/term_details?term=GO:0071706
positive regulation of neuron differentiation	Biological Process	GO:0045666	2	235	103	17517	0.0194174757281553	0.0134155391905007	0.4031409808	0.7750419	hsa:79816,TLE6,79816:down|hsa:2043,EPHA4,2043:up	http://amigo.geneontology.org/cgi-bin/amigo/term_details?term=GO:0045666
cell cycle process	Biological Process	GO:0022402	8	1193	103	17517	0.0776699029126214	0.0681052691670948	0.4034908386	0.7750419	hsa:29933,GPR132,29933:up|hsa:55023,PHIP,55023:up|hsa:90,ACVR1,90:up|hsa:339345,NANOS2,339345:up|hsa:80321,CEP70,80321:up|hsa:10397,NDRG1,10397:up|hsa:4291,MLF1,4291:up|hsa:901,CCNG2,901:down	http://amigo.geneontology.org/cgi-bin/amigo/term_details?term=GO:0022402
blood vessel development	Biological Process	GO:0001568	4	549	103	17517	0.0388349514563107	0.031340983045042	0.4046613013	0.7750419	hsa:10553,HTATIP2,10553:down|hsa:2821,GPI,2821:up|hsa:90,ACVR1,90:up|hsa:3091,HIF1A,3091:up	http://amigo.geneontology.org/cgi-bin/amigo/term_details?term=GO:0001568
stress-activated MAPK cascade	Biological Process	GO:0051403	2	236	103	17517	0.0194174757281553	0.0134726265913113	0.4052013263	0.7750419	hsa:2043,EPHA4,2043:up|hsa:4293,MAP3K9,4293:down	http://amigo.geneontology.org/cgi-bin/amigo/term_details?term=GO:0051403
integrin-mediated signaling pathway	Biological Process	GO:0007229	1	88	103	17517	0.00970873786407767	0.00502369127133642	0.4056365984	0.7750419	hsa:4185,ADAM11,4185:up	http://amigo.geneontology.org/cgi-bin/amigo/term_details?term=GO:0007229
cerebellum development	Biological Process	GO:0021549	1	88	103	17517	0.00970873786407767	0.00502369127133642	0.4056365984	0.7750419	hsa:10978,CLP1,10978:up	http://amigo.geneontology.org/cgi-bin/amigo/term_details?term=GO:0021549
regulation of dendrite development	Biological Process	GO:0050773	1	88	103	17517	0.00970873786407767	0.00502369127133642	0.4056365984	0.7750419	hsa:2043,EPHA4,2043:up	http://amigo.geneontology.org/cgi-bin/amigo/term_details?term=GO:0050773
cellular response to DNA damage stimulus	Biological Process	GO:0006974	5	710	103	17517	0.0485436893203883	0.0405320545755552	0.4060338135	0.7750419	hsa:56160,NDNL2,56160:up|hsa:10397,NDRG1,10397:up|hsa:197342,EME2,197342:up|hsa:5886,RAD23A,5886:down|hsa:79073,TMEM109,79073:down	http://amigo.geneontology.org/cgi-bin/amigo/term_details?term=GO:0006974
nucleocytoplasmic transport	Biological Process	GO:0006913	3	392	103	17517	0.029126213592233	0.0223782611177713	0.4064090303	0.7750419	hsa:10553,HTATIP2,10553:down|hsa:26019,UPF2,26019:up|hsa:55023,PHIP,55023:up	http://amigo.geneontology.org/cgi-bin/amigo/term_details?term=GO:0006913
movement of cell or subcellular component	Biological Process	GO:0006928	11	1689	103	17517	0.106796116504854	0.0964206199691728	0.4077497404	0.7750419	hsa:154810,AMOTL1,154810:up|hsa:90,ACVR1,90:up|hsa:3091,HIF1A,3091:up|hsa:752,FMNL1,752:down|hsa:23473,CAPN7,23473:up|hsa:2043,EPHA4,2043:up|hsa:971,CD72,971:down|hsa:30011,SH3KBP1,30011:down|hsa:56288,PARD3,56288:up|hsa:9722,NOS1AP,9722:up|hsa:199953,TMEM201,199953:down	http://amigo.geneontology.org/cgi-bin/amigo/term_details?term=GO:0006928
positive regulation of programmed cell death	Biological Process	GO:0043068	4	552	103	17517	0.0388349514563107	0.0315122452474739	0.4086564412	0.7750419	hsa:23567,ZNF346,23567:up|hsa:23263,MCF2L,23263:down|hsa:64857,PLEKHG2,64857:down|hsa:4293,MAP3K9,4293:down	http://amigo.geneontology.org/cgi-bin/amigo/term_details?term=GO:0043068
neuropeptide signaling pathway	Biological Process	GO:0007218	1	89	103	17517	0.00970873786407767	0.00508077867214706	0.4091491023	0.7750419	hsa:256933,NPB,256933:up	http://amigo.geneontology.org/cgi-bin/amigo/term_details?term=GO:0007218
body fluid secretion	Biological Process	GO:0007589	1	89	103	17517	0.00970873786407767	0.00508077867214706	0.4091491023	0.7750419	hsa:3091,HIF1A,3091:up	http://amigo.geneontology.org/cgi-bin/amigo/term_details?term=GO:0007589
DNA-templated transcription, termination	Biological Process	GO:0006353	1	89	103	17517	0.00970873786407767	0.00508077867214706	0.4091491023	0.7750419	hsa:10978,CLP1,10978:up	http://amigo.geneontology.org/cgi-bin/amigo/term_details?term=GO:0006353
intracellular signal transduction	Biological Process	GO:0035556	15	2352	103	17517	0.145631067961165	0.134269566706628	0.4098907065	0.7750419	hsa:5999,RGS4,5999:down|hsa:55841,WWC3,55841:up|hsa:154810,AMOTL1,154810:up|hsa:1850,DUSP8,1850:up|hsa:3091,HIF1A,3091:up|hsa:23263,MCF2L,23263:down|hsa:10397,NDRG1,10397:up|hsa:54622,ARL15,54622:up|hsa:2043,EPHA4,2043:up|hsa:5864,RAB3A,5864:down|hsa:4293,MAP3K9,4293:down|hsa:79073,TMEM109,79073:down|hsa:11123,RCAN3,11123:up|hsa:9722,NOS1AP,9722:up|hsa:64857,PLEKHG2,64857:down	http://amigo.geneontology.org/cgi-bin/amigo/term_details?term=GO:0035556
organic substance catabolic process	Biological Process	GO:1901575	11	1692	103	17517	0.106796116504854	0.0965918821716047	0.4100769125	0.7750419	hsa:6202,RPS8,6202:down|hsa:6187,RPS2,6187:down|hsa:1373,CPS1,1373:up|hsa:339345,NANOS2,339345:up|hsa:6161,RPL32,6161:down|hsa:3091,HIF1A,3091:up|hsa:51667,NUB1,51667:up|hsa:6143,RPL19,6143:down|hsa:26019,UPF2,26019:up|hsa:2821,GPI,2821:up|hsa:5886,RAD23A,5886:down	http://amigo.geneontology.org/cgi-bin/amigo/term_details?term=GO:1901575
regulation of system process	Biological Process	GO:0044057	3	395	103	17517	0.029126213592233	0.0225495233202032	0.4111499160	0.7750419	hsa:1373,CPS1,1373:up|hsa:9722,NOS1AP,9722:up|hsa:56288,PARD3,56288:up	http://amigo.geneontology.org/cgi-bin/amigo/term_details?term=GO:0044057
growth	Biological Process	GO:0040007	6	876	103	17517	0.058252427184466	0.0500085631101216	0.4111965069	0.7750419	hsa:55841,WWC3,55841:up|hsa:55023,PHIP,55023:up|hsa:3091,HIF1A,3091:up|hsa:56160,NDNL2,56160:up|hsa:149428,BNIPL,149428:up|hsa:8548,BLZF1,8548:up	http://amigo.geneontology.org/cgi-bin/amigo/term_details?term=GO:0040007
stress-activated protein kinase signaling cascade	Biological Process	GO:0031098	2	239	103	17517	0.0194174757281553	0.0136438887937432	0.4113622807	0.7750419	hsa:2043,EPHA4,2043:up|hsa:4293,MAP3K9,4293:down	http://amigo.geneontology.org/cgi-bin/amigo/term_details?term=GO:0031098
cell junction organization	Biological Process	GO:0034330	2	239	103	17517	0.0194174757281553	0.0136438887937432	0.4113622807	0.7750419	hsa:153562,MARVELD2,153562:down|hsa:56288,PARD3,56288:up	http://amigo.geneontology.org/cgi-bin/amigo/term_details?term=GO:0034330
cellular response to carbohydrate stimulus	Biological Process	GO:0071322	1	90	103	17517	0.00970873786407767	0.0051378660729577	0.4126410487	0.7750419	hsa:3091,HIF1A,3091:up	http://amigo.geneontology.org/cgi-bin/amigo/term_details?term=GO:0071322
alpha-amino acid catabolic process	Biological Process	GO:1901606	1	90	103	17517	0.00970873786407767	0.0051378660729577	0.4126410487	0.7750419	hsa:1373,CPS1,1373:up	http://amigo.geneontology.org/cgi-bin/amigo/term_details?term=GO:1901606
monosaccharide biosynthetic process	Biological Process	GO:0046364	1	90	103	17517	0.00970873786407767	0.0051378660729577	0.4126410487	0.7750419	hsa:2821,GPI,2821:up	http://amigo.geneontology.org/cgi-bin/amigo/term_details?term=GO:0046364
nucleotide catabolic process	Biological Process	GO:0009166	1	90	103	17517	0.00970873786407767	0.0051378660729577	0.4126410487	0.7750419	hsa:3091,HIF1A,3091:up	http://amigo.geneontology.org/cgi-bin/amigo/term_details?term=GO:0009166
negative regulation of protein metabolic process	Biological Process	GO:0051248	6	878	103	17517	0.058252427184466	0.0501227379117429	0.4133160961	0.7750419	hsa:5999,RGS4,5999:down|hsa:2821,GPI,2821:up|hsa:339345,NANOS2,339345:up|hsa:1850,DUSP8,1850:up|hsa:58509,CACTIN,58509:up|hsa:56288,PARD3,56288:up	http://amigo.geneontology.org/cgi-bin/amigo/term_details?term=GO:0051248
nuclear transport	Biological Process	GO:0051169	3	397	103	17517	0.029126213592233	0.0226636981218245	0.4143043728	0.7750419	hsa:10553,HTATIP2,10553:down|hsa:26019,UPF2,26019:up|hsa:55023,PHIP,55023:up	http://amigo.geneontology.org/cgi-bin/amigo/term_details?term=GO:0051169
nuclear import	Biological Process	GO:0051170	2	241	103	17517	0.0194174757281553	0.0137580635953645	0.4154525324	0.7750419	hsa:10553,HTATIP2,10553:down|hsa:55023,PHIP,55023:up	http://amigo.geneontology.org/cgi-bin/amigo/term_details?term=GO:0051170
regulation of endothelial cell proliferation	Biological Process	GO:0001936	1	91	103	17517	0.00970873786407767	0.00519495347376834	0.4161125568	0.7750419	hsa:3091,HIF1A,3091:up	http://amigo.geneontology.org/cgi-bin/amigo/term_details?term=GO:0001936
primary neural tube formation	Biological Process	GO:0014020	1	91	103	17517	0.00970873786407767	0.00519495347376834	0.4161125568	0.7750419	hsa:3091,HIF1A,3091:up	http://amigo.geneontology.org/cgi-bin/amigo/term_details?term=GO:0014020
positive regulation of viral life cycle	Biological Process	GO:1903902	1	91	103	17517	0.00970873786407767	0.00519495347376834	0.4161125568	0.7750419	hsa:5886,RAD23A,5886:down	http://amigo.geneontology.org/cgi-bin/amigo/term_details?term=GO:1903902
response to cAMP	Biological Process	GO:0051591	1	91	103	17517	0.00970873786407767	0.00519495347376834	0.4161125568	0.7750419	hsa:1373,CPS1,1373:up	http://amigo.geneontology.org/cgi-bin/amigo/term_details?term=GO:0051591
locomotion	Biological Process	GO:0040011	10	1537	103	17517	0.0970873786407767	0.0877433350459554	0.4176603832	0.7773214	hsa:154810,AMOTL1,154810:up|hsa:90,ACVR1,90:up|hsa:3091,HIF1A,3091:up|hsa:752,FMNL1,752:down|hsa:23473,CAPN7,23473:up|hsa:2043,EPHA4,2043:up|hsa:971,CD72,971:down|hsa:30011,SH3KBP1,30011:down|hsa:56288,PARD3,56288:up|hsa:199953,TMEM201,199953:down	http://amigo.geneontology.org/cgi-bin/amigo/term_details?term=GO:0040011
negative regulation of neuron projection development	Biological Process	GO:0010977	1	92	103	17517	0.00970873786407767	0.00525204087457898	0.4195637451	0.7778465	hsa:2043,EPHA4,2043:up	http://amigo.geneontology.org/cgi-bin/amigo/term_details?term=GO:0010977
positive regulation of viral process	Biological Process	GO:0048524	1	92	103	17517	0.00970873786407767	0.00525204087457898	0.4195637451	0.7778465	hsa:5886,RAD23A,5886:down	http://amigo.geneontology.org/cgi-bin/amigo/term_details?term=GO:0048524
regulation of stem cell proliferation	Biological Process	GO:0072091	1	92	103	17517	0.00970873786407767	0.00525204087457898	0.4195637451	0.7778465	hsa:3091,HIF1A,3091:up	http://amigo.geneontology.org/cgi-bin/amigo/term_details?term=GO:0072091
epithelium development	Biological Process	GO:0060429	7	1049	103	17517	0.0679611650485437	0.0598846834503625	0.4215282896	0.7787908	hsa:1373,CPS1,1373:up|hsa:90,ACVR1,90:up|hsa:3091,HIF1A,3091:up|hsa:153562,MARVELD2,153562:down|hsa:2709,GJB5,2709:down|hsa:56288,PARD3,56288:up|hsa:353131,LCE1A,353131:up	http://amigo.geneontology.org/cgi-bin/amigo/term_details?term=GO:0060429
ephrin receptor signaling pathway	Biological Process	GO:0048013	1	93	103	17517	0.00970873786407767	0.00530912827538962	0.4229947313	0.7787908	hsa:2043,EPHA4,2043:up	http://amigo.geneontology.org/cgi-bin/amigo/term_details?term=GO:0048013
acid secretion	Biological Process	GO:0046717	1	93	103	17517	0.00970873786407767	0.00530912827538962	0.4229947313	0.7787908	hsa:5864,RAB3A,5864:down	http://amigo.geneontology.org/cgi-bin/amigo/term_details?term=GO:0046717
positive regulation of transmembrane receptor protein serine/threonine kinase signaling pathway	Biological Process	GO:0090100	1	93	103	17517	0.00970873786407767	0.00530912827538962	0.4229947313	0.7787908	hsa:90,ACVR1,90:up	http://amigo.geneontology.org/cgi-bin/amigo/term_details?term=GO:0090100
epithelial to mesenchymal transition	Biological Process	GO:0001837	1	93	103	17517	0.00970873786407767	0.00530912827538962	0.4229947313	0.7787908	hsa:3091,HIF1A,3091:up	http://amigo.geneontology.org/cgi-bin/amigo/term_details?term=GO:0001837
cell cycle checkpoint	Biological Process	GO:0000075	2	246	103	17517	0.0194174757281553	0.0140435005994177	0.4256167154	0.7824172	hsa:10397,NDRG1,10397:up|hsa:901,CCNG2,901:down	http://amigo.geneontology.org/cgi-bin/amigo/term_details?term=GO:0000075
G1/S transition of mitotic cell cycle	Biological Process	GO:0000082	2	246	103	17517	0.0194174757281553	0.0140435005994177	0.4256167154	0.7824172	hsa:29933,GPR132,29933:up|hsa:90,ACVR1,90:up	http://amigo.geneontology.org/cgi-bin/amigo/term_details?term=GO:0000082
cellular glucose homeostasis	Biological Process	GO:0001678	1	94	103	17517	0.00970873786407767	0.00536621567620026	0.4264056325	0.7826680	hsa:3091,HIF1A,3091:up	http://amigo.geneontology.org/cgi-bin/amigo/term_details?term=GO:0001678
cerebral cortex development	Biological Process	GO:0021987	1	94	103	17517	0.00970873786407767	0.00536621567620026	0.4264056325	0.7826680	hsa:3091,HIF1A,3091:up	http://amigo.geneontology.org/cgi-bin/amigo/term_details?term=GO:0021987
cell cycle G1/S phase transition	Biological Process	GO:0044843	2	248	103	17517	0.0194174757281553	0.014157675401039	0.4296572031	0.7850558	hsa:29933,GPR132,29933:up|hsa:90,ACVR1,90:up	http://amigo.geneontology.org/cgi-bin/amigo/term_details?term=GO:0044843
regulation of striated muscle tissue development	Biological Process	GO:0016202	1	95	103	17517	0.00970873786407767	0.0054233030770109	0.4297965651	0.7850558	hsa:90,ACVR1,90:up	http://amigo.geneontology.org/cgi-bin/amigo/term_details?term=GO:0016202
leukocyte apoptotic process	Biological Process	GO:0071887	1	95	103	17517	0.00970873786407767	0.0054233030770109	0.4297965651	0.7850558	hsa:3091,HIF1A,3091:up	http://amigo.geneontology.org/cgi-bin/amigo/term_details?term=GO:0071887
axonogenesis	Biological Process	GO:0007409	4	568	103	17517	0.0388349514563107	0.0324256436604441	0.4298736575	0.7850558	hsa:971,CD72,971:down|hsa:56288,PARD3,56288:up|hsa:2043,EPHA4,2043:up|hsa:5864,RAB3A,5864:down	http://amigo.geneontology.org/cgi-bin/amigo/term_details?term=GO:0007409
regulation of catabolic process	Biological Process	GO:0009894	4	568	103	17517	0.0388349514563107	0.0324256436604441	0.4298736575	0.7850558	hsa:339345,NANOS2,339345:up|hsa:3091,HIF1A,3091:up|hsa:51667,NUB1,51667:up|hsa:5886,RAD23A,5886:down	http://amigo.geneontology.org/cgi-bin/amigo/term_details?term=GO:0009894
gland development	Biological Process	GO:0048732	3	407	103	17517	0.029126213592233	0.0232345721299309	0.4299972040	0.7850558	hsa:26019,UPF2,26019:up|hsa:1373,CPS1,1373:up|hsa:3091,HIF1A,3091:up	http://amigo.geneontology.org/cgi-bin/amigo/term_details?term=GO:0048732
vasculature development	Biological Process	GO:0001944	4	569	103	17517	0.0388349514563107	0.0324827310612548	0.4311939566	0.7854642	hsa:10553,HTATIP2,10553:down|hsa:2821,GPI,2821:up|hsa:90,ACVR1,90:up|hsa:3091,HIF1A,3091:up	http://amigo.geneontology.org/cgi-bin/amigo/term_details?term=GO:0001944
activation of immune response	Biological Process	GO:0002253	3	408	103	17517	0.029126213592233	0.0232916595307416	0.4315587534	0.7854642	hsa:115004,MB21D1,115004:down|hsa:9473,THEMIS2,9473:up|hsa:58509,CACTIN,58509:up	http://amigo.geneontology.org/cgi-bin/amigo/term_details?term=GO:0002253
cardiac ventricle development	Biological Process	GO:0003231	1	96	103	17517	0.00970873786407767	0.00548039047782154	0.4331676450	0.7854642	hsa:3091,HIF1A,3091:up	http://amigo.geneontology.org/cgi-bin/amigo/term_details?term=GO:0003231
regulation of muscle tissue development	Biological Process	GO:1901861	1	96	103	17517	0.00970873786407767	0.00548039047782154	0.4331676450	0.7854642	hsa:90,ACVR1,90:up	http://amigo.geneontology.org/cgi-bin/amigo/term_details?term=GO:1901861
cellular polysaccharide metabolic process	Biological Process	GO:0044264	1	96	103	17517	0.00970873786407767	0.00548039047782154	0.4331676450	0.7854642	hsa:1373,CPS1,1373:up	http://amigo.geneontology.org/cgi-bin/amigo/term_details?term=GO:0044264
positive regulation of hormone secretion	Biological Process	GO:0046887	1	96	103	17517	0.00970873786407767	0.00548039047782154	0.4331676450	0.7854642	hsa:3091,HIF1A,3091:up	http://amigo.geneontology.org/cgi-bin/amigo/term_details?term=GO:0046887
positive regulation of cell death	Biological Process	GO:0010942	4	573	103	17517	0.0388349514563107	0.0327110806644973	0.4364674782	0.7873752	hsa:23567,ZNF346,23567:up|hsa:23263,MCF2L,23263:down|hsa:64857,PLEKHG2,64857:down|hsa:4293,MAP3K9,4293:down	http://amigo.geneontology.org/cgi-bin/amigo/term_details?term=GO:0010942
regulation of muscle organ development	Biological Process	GO:0048634	1	97	103	17517	0.00970873786407767	0.00553747787863219	0.4365189872	0.7873752	hsa:90,ACVR1,90:up	http://amigo.geneontology.org/cgi-bin/amigo/term_details?term=GO:0048634
peptidyl-tyrosine dephosphorylation	Biological Process	GO:0035335	1	97	103	17517	0.00970873786407767	0.00553747787863219	0.4365189872	0.7873752	hsa:1850,DUSP8,1850:up	http://amigo.geneontology.org/cgi-bin/amigo/term_details?term=GO:0035335
microtubule-based transport	Biological Process	GO:0010970	1	97	103	17517	0.00970873786407767	0.00553747787863219	0.4365189872	0.7873752	hsa:3091,HIF1A,3091:up	http://amigo.geneontology.org/cgi-bin/amigo/term_details?term=GO:0010970
mRNA splicing, via spliceosome	Biological Process	GO:0000398	2	252	103	17517	0.0194174757281553	0.0143860250042816	0.4376937956	0.7883089	hsa:58509,CACTIN,58509:up|hsa:10978,CLP1,10978:up	http://amigo.geneontology.org/cgi-bin/amigo/term_details?term=GO:0000398
RNA splicing, via transesterification reactions with bulged adenosine as nucleophile	Biological Process	GO:0000377	2	252	103	17517	0.0194174757281553	0.0143860250042816	0.4376937956	0.7883089	hsa:58509,CACTIN,58509:up|hsa:10978,CLP1,10978:up	http://amigo.geneontology.org/cgi-bin/amigo/term_details?term=GO:0000377
regulation of phosphorylation	Biological Process	GO:0042325	8	1231	103	17517	0.0776699029126214	0.0702745903978992	0.4380681838	0.7883334	hsa:5999,RGS4,5999:down|hsa:55023,PHIP,55023:up|hsa:90,ACVR1,90:up|hsa:1850,DUSP8,1850:up|hsa:2043,EPHA4,2043:up|hsa:4293,MAP3K9,4293:down|hsa:58509,CACTIN,58509:up|hsa:56288,PARD3,56288:up	http://amigo.geneontology.org/cgi-bin/amigo/term_details?term=GO:0042325
synaptic vesicle transport	Biological Process	GO:0048489	1	98	103	17517	0.00970873786407767	0.00559456527944283	0.4398507062	0.7883334	hsa:5864,RAB3A,5864:down	http://amigo.geneontology.org/cgi-bin/amigo/term_details?term=GO:0048489
dendrite morphogenesis	Biological Process	GO:0048813	1	98	103	17517	0.00970873786407767	0.00559456527944283	0.4398507062	0.7883334	hsa:2043,EPHA4,2043:up	http://amigo.geneontology.org/cgi-bin/amigo/term_details?term=GO:0048813
establishment of synaptic vesicle localization	Biological Process	GO:0097480	1	98	103	17517	0.00970873786407767	0.00559456527944283	0.4398507062	0.7883334	hsa:5864,RAB3A,5864:down	http://amigo.geneontology.org/cgi-bin/amigo/term_details?term=GO:0097480
nucleoside phosphate catabolic process	Biological Process	GO:1901292	1	98	103	17517	0.00970873786407767	0.00559456527944283	0.4398507062	0.7883334	hsa:3091,HIF1A,3091:up	http://amigo.geneontology.org/cgi-bin/amigo/term_details?term=GO:1901292
regulation of protein metabolic process	Biological Process	GO:0051246	14	2230	103	17517	0.135922330097087	0.12730490380773	0.4400076568	0.7883334	hsa:5999,RGS4,5999:down|hsa:55023,PHIP,55023:up|hsa:90,ACVR1,90:up|hsa:339345,NANOS2,339345:up|hsa:1850,DUSP8,1850:up|hsa:51667,NUB1,51667:up|hsa:2043,EPHA4,2043:up|hsa:4293,MAP3K9,4293:down|hsa:2821,GPI,2821:up|hsa:56160,NDNL2,56160:up|hsa:58509,CACTIN,58509:up|hsa:9722,NOS1AP,9722:up|hsa:56288,PARD3,56288:up|hsa:5886,RAD23A,5886:down	http://amigo.geneontology.org/cgi-bin/amigo/term_details?term=GO:0051246
post-embryonic development	Biological Process	GO:0009791	1	99	103	17517	0.00970873786407767	0.00565165268025347	0.4431629157	0.7896084	hsa:5864,RAB3A,5864:down	http://amigo.geneontology.org/cgi-bin/amigo/term_details?term=GO:0009791
organelle fusion	Biological Process	GO:0048284	1	99	103	17517	0.00970873786407767	0.00565165268025347	0.4431629157	0.7896084	hsa:5864,RAB3A,5864:down	http://amigo.geneontology.org/cgi-bin/amigo/term_details?term=GO:0048284
RNA processing	Biological Process	GO:0006396	5	742	103	17517	0.0485436893203883	0.0423588514014957	0.4433877468	0.7896084	hsa:6202,RPS8,6202:down|hsa:152992,TRMT44,152992:up|hsa:58509,CACTIN,58509:up|hsa:79650,USB1,79650:up|hsa:10978,CLP1,10978:up	http://amigo.geneontology.org/cgi-bin/amigo/term_details?term=GO:0006396
RNA splicing, via transesterification reactions	Biological Process	GO:0000375	2	255	103	17517	0.0194174757281553	0.0145572872067135	0.4436815887	0.7896084	hsa:58509,CACTIN,58509:up|hsa:10978,CLP1,10978:up	http://amigo.geneontology.org/cgi-bin/amigo/term_details?term=GO:0000375
regulation of cell division	Biological Process	GO:0051302	2	256	103	17517	0.0194174757281553	0.0146143746075241	0.4456698344	0.7898247	hsa:55023,PHIP,55023:up|hsa:339345,NANOS2,339345:up	http://amigo.geneontology.org/cgi-bin/amigo/term_details?term=GO:0051302
transition metal ion transport	Biological Process	GO:0000041	1	100	103	17517	0.00970873786407767	0.00570874008106411	0.4464557289	0.7898247	hsa:2495,FTH1,2495:down	http://amigo.geneontology.org/cgi-bin/amigo/term_details?term=GO:0000041
metencephalon development	Biological Process	GO:0022037	1	100	103	17517	0.00970873786407767	0.00570874008106411	0.4464557289	0.7898247	hsa:10978,CLP1,10978:up	http://amigo.geneontology.org/cgi-bin/amigo/term_details?term=GO:0022037
cardiac muscle contraction	Biological Process	GO:0060048	1	100	103	17517	0.00970873786407767	0.00570874008106411	0.4464557289	0.7898247	hsa:9722,NOS1AP,9722:up	http://amigo.geneontology.org/cgi-bin/amigo/term_details?term=GO:0060048
regulation of endothelial cell migration	Biological Process	GO:0010594	1	100	103	17517	0.00970873786407767	0.00570874008106411	0.4464557289	0.7898247	hsa:154810,AMOTL1,154810:up	http://amigo.geneontology.org/cgi-bin/amigo/term_details?term=GO:0010594
regulation of MAPK cascade	Biological Process	GO:0043408	4	582	103	17517	0.0388349514563107	0.0332248672717931	0.4482847119	0.7898247	hsa:5999,RGS4,5999:down|hsa:1850,DUSP8,1850:up|hsa:2043,EPHA4,2043:up|hsa:4293,MAP3K9,4293:down	http://amigo.geneontology.org/cgi-bin/amigo/term_details?term=GO:0043408
cellular component disassembly	Biological Process	GO:0022411	4	583	103	17517	0.0388349514563107	0.0332819546726038	0.4495933433	0.7898247	hsa:6202,RPS8,6202:down|hsa:6143,RPL19,6143:down|hsa:6187,RPS2,6187:down|hsa:6161,RPL32,6161:down	http://amigo.geneontology.org/cgi-bin/amigo/term_details?term=GO:0022411
regulation of proteolysis involved in cellular protein catabolic process	Biological Process	GO:1903050	2	258	103	17517	0.0194174757281553	0.0147285494091454	0.4496346552	0.7898247	hsa:51667,NUB1,51667:up|hsa:5886,RAD23A,5886:down	http://amigo.geneontology.org/cgi-bin/amigo/term_details?term=GO:1903050
erythrocyte differentiation	Biological Process	GO:0030218	1	101	103	17517	0.00970873786407767	0.00576582748187475	0.4497292582	0.7898247	hsa:3091,HIF1A,3091:up	http://amigo.geneontology.org/cgi-bin/amigo/term_details?term=GO:0030218
regulation of mRNA metabolic process	Biological Process	GO:1903311	1	101	103	17517	0.00970873786407767	0.00576582748187475	0.4497292582	0.7898247	hsa:339345,NANOS2,339345:up	http://amigo.geneontology.org/cgi-bin/amigo/term_details?term=GO:1903311
mRNA 3'-end processing	Biological Process	GO:0031124	1	101	103	17517	0.00970873786407767	0.00576582748187475	0.4497292582	0.7898247	hsa:10978,CLP1,10978:up	http://amigo.geneontology.org/cgi-bin/amigo/term_details?term=GO:0031124
synaptic vesicle localization	Biological Process	GO:0097479	1	101	103	17517	0.00970873786407767	0.00576582748187475	0.4497292582	0.7898247	hsa:5864,RAB3A,5864:down	http://amigo.geneontology.org/cgi-bin/amigo/term_details?term=GO:0097479
response to lipopolysaccharide	Biological Process	GO:0032496	2	259	103	17517	0.0194174757281553	0.014785636809956	0.4516111840	0.7915787	hsa:1373,CPS1,1373:up|hsa:58509,CACTIN,58509:up	http://amigo.geneontology.org/cgi-bin/amigo/term_details?term=GO:0032496
organic cyclic compound biosynthetic process	Biological Process	GO:1901362	25	4093	103	17517	0.242718446601942	0.233658731517954	0.4516715936	0.7915787	hsa:6202,RPS8,6202:down|hsa:55841,WWC3,55841:up|hsa:6187,RPS2,6187:down|hsa:55023,PHIP,55023:up|hsa:90,ACVR1,90:up|hsa:115004,MB21D1,115004:down|hsa:55279,ZNF654,55279:up|hsa:4291,MLF1,4291:up|hsa:10978,CLP1,10978:up|hsa:2274,FHL2,2274:up|hsa:10553,HTATIP2,10553:down|hsa:54925,ZSCAN32,54925:up|hsa:58509,CACTIN,58509:up|hsa:653619,PRAMEF15,653619:up|hsa:6161,RPL32,6161:down|hsa:3091,HIF1A,3091:up|…	http://amigo.geneontology.org/cgi-bin/amigo/term_details?term=GO:1901362
embryonic organ development	Biological Process	GO:0048568	3	421	103	17517	0.029126213592233	0.0240337957412799	0.4517178738	0.7915787	hsa:90,ACVR1,90:up|hsa:3091,HIF1A,3091:up|hsa:2709,GJB5,2709:down	http://amigo.geneontology.org/cgi-bin/amigo/term_details?term=GO:0048568
neuron death	Biological Process	GO:0070997	2	260	103	17517	0.0194174757281553	0.0148427242107667	0.4535837616	0.7936889	hsa:2821,GPI,2821:up|hsa:3091,HIF1A,3091:up	http://amigo.geneontology.org/cgi-bin/amigo/term_details?term=GO:0070997
neural tube formation	Biological Process	GO:0001841	1	103	103	17517	0.00970873786407767	0.00588000228349603	0.4562189119	0.7965569	hsa:3091,HIF1A,3091:up	http://amigo.geneontology.org/cgi-bin/amigo/term_details?term=GO:0001841
sequestering of metal ion	Biological Process	GO:0051238	1	104	103	17517	0.00970873786407767	0.00593708968430667	0.4594352581	0.8010067	hsa:2495,FTH1,2495:down	http://amigo.geneontology.org/cgi-bin/amigo/term_details?term=GO:0051238
axon development	Biological Process	GO:0061564	4	591	103	17517	0.0388349514563107	0.0337386538790889	0.4600282786	0.8014581	hsa:971,CD72,971:down|hsa:56288,PARD3,56288:up|hsa:2043,EPHA4,2043:up|hsa:5864,RAB3A,5864:down	http://amigo.geneontology.org/cgi-bin/amigo/term_details?term=GO:0061564
DNA repair	Biological Process	GO:0006281	3	428	103	17517	0.029126213592233	0.0244334075469544	0.4624560624	0.8039438	hsa:56160,NDNL2,56160:up|hsa:197342,EME2,197342:up|hsa:5886,RAD23A,5886:down	http://amigo.geneontology.org/cgi-bin/amigo/term_details?term=GO:0006281
antigen processing and presentation of peptide antigen via MHC class I	Biological Process	GO:0002474	1	105	103	17517	0.00970873786407767	0.00599417708511731	0.4626327639	0.8039438	hsa:6892,TAPBP,6892:up	http://amigo.geneontology.org/cgi-bin/amigo/term_details?term=GO:0002474
negative regulation of immune response	Biological Process	GO:0050777	1	105	103	17517	0.00970873786407767	0.00599417708511731	0.4626327639	0.8039438	hsa:58509,CACTIN,58509:up	http://amigo.geneontology.org/cgi-bin/amigo/term_details?term=GO:0050777
response to metal ion	Biological Process	GO:0010038	2	266	103	17517	0.0194174757281553	0.0151852486156305	0.4653350397	0.8039438	hsa:1373,CPS1,1373:up|hsa:10397,NDRG1,10397:up	http://amigo.geneontology.org/cgi-bin/amigo/term_details?term=GO:0010038
gene expression	Biological Process	GO:0010467	31	5131	103	17517	0.300970873786408	0.292915453559399	0.4655992896	0.8039438	hsa:6202,RPS8,6202:down|hsa:55841,WWC3,55841:up|hsa:6187,RPS2,6187:down|hsa:55023,PHIP,55023:up|hsa:90,ACVR1,90:up|hsa:55279,ZNF654,55279:up|hsa:4291,MLF1,4291:up|hsa:10978,CLP1,10978:up|hsa:2274,FHL2,2274:up|hsa:10553,HTATIP2,10553:down|hsa:54925,ZSCAN32,54925:up|hsa:152992,TRMT44,152992:up|hsa:58509,CACTIN,58509:up|hsa:9722,NOS1AP,9722:up|hsa:653619,PRAMEF15,653619:up|hsa:79650,USB1,79650:up|hs…	http://amigo.geneontology.org/cgi-bin/amigo/term_details?term=GO:0010467
cytoskeleton-dependent intracellular transport	Biological Process	GO:0030705	1	106	103	17517	0.00970873786407767	0.00605126448592796	0.4658115386	0.8039438	hsa:3091,HIF1A,3091:up	http://amigo.geneontology.org/cgi-bin/amigo/term_details?term=GO:0030705
intrinsic apoptotic signaling pathway in response to DNA damage	Biological Process	GO:0008630	1	106	103	17517	0.00970873786407767	0.00605126448592796	0.4658115386	0.8039438	hsa:79073,TMEM109,79073:down	http://amigo.geneontology.org/cgi-bin/amigo/term_details?term=GO:0008630
regulation of peptidyl-serine phosphorylation	Biological Process	GO:0033135	1	106	103	17517	0.00970873786407767	0.00605126448592796	0.4658115386	0.8039438	hsa:55023,PHIP,55023:up	http://amigo.geneontology.org/cgi-bin/amigo/term_details?term=GO:0033135
regulation of osteoblast differentiation	Biological Process	GO:0045667	1	106	103	17517	0.00970873786407767	0.00605126448592796	0.4658115386	0.8039438	hsa:90,ACVR1,90:up	http://amigo.geneontology.org/cgi-bin/amigo/term_details?term=GO:0045667
endothelial cell proliferation	Biological Process	GO:0001935	1	106	103	17517	0.00970873786407767	0.00605126448592796	0.4658115386	0.8039438	hsa:3091,HIF1A,3091:up	http://amigo.geneontology.org/cgi-bin/amigo/term_details?term=GO:0001935
dorsal/ventral pattern formation	Biological Process	GO:0009953	1	106	103	17517	0.00970873786407767	0.00605126448592796	0.4658115386	0.8039438	hsa:90,ACVR1,90:up	http://amigo.geneontology.org/cgi-bin/amigo/term_details?term=GO:0009953
tube development	Biological Process	GO:0035295	4	596	103	17517	0.0388349514563107	0.0340240908831421	0.4665176324	0.8045836	hsa:1373,CPS1,1373:up|hsa:90,ACVR1,90:up|hsa:3091,HIF1A,3091:up|hsa:5864,RAB3A,5864:down	http://amigo.geneontology.org/cgi-bin/amigo/term_details?term=GO:0035295
cell cycle	Biological Process	GO:0007049	10	1600	103	17517	0.0970873786407767	0.0913398412970257	0.4688310937	0.8063451	hsa:29933,GPR132,29933:up|hsa:55023,PHIP,55023:up|hsa:90,ACVR1,90:up|hsa:339345,NANOS2,339345:up|hsa:80321,CEP70,80321:up|hsa:10397,NDRG1,10397:up|hsa:4291,MLF1,4291:up|hsa:56288,PARD3,56288:up|hsa:901,CCNG2,901:down|hsa:8548,BLZF1,8548:up	http://amigo.geneontology.org/cgi-bin/amigo/term_details?term=GO:0007049
establishment of protein localization to plasma membrane	Biological Process	GO:0090002	1	107	103	17517	0.00970873786407767	0.0061083518867386	0.4689716909	0.8063451	hsa:8548,BLZF1,8548:up	http://amigo.geneontology.org/cgi-bin/amigo/term_details?term=GO:0090002
cellular response to tumor necrosis factor	Biological Process	GO:0071356	1	107	103	17517	0.00970873786407767	0.0061083518867386	0.4689716909	0.8063451	hsa:58509,CACTIN,58509:up	http://amigo.geneontology.org/cgi-bin/amigo/term_details?term=GO:0071356
coenzyme metabolic process	Biological Process	GO:0006732	2	268	103	17517	0.0194174757281553	0.0152994234172518	0.4692195647	0.8063451	hsa:2821,GPI,2821:up|hsa:3091,HIF1A,3091:up	http://amigo.geneontology.org/cgi-bin/amigo/term_details?term=GO:0006732
regulation of cellular protein catabolic process	Biological Process	GO:1903362	2	268	103	17517	0.0194174757281553	0.0152994234172518	0.4692195647	0.8063451	hsa:51667,NUB1,51667:up|hsa:5886,RAD23A,5886:down	http://amigo.geneontology.org/cgi-bin/amigo/term_details?term=GO:1903362
anatomical structure morphogenesis	Biological Process	GO:0009653	15	2442	103	17517	0.145631067961165	0.139407432779586	0.4703834745	0.8077666	hsa:55023,PHIP,55023:up|hsa:90,ACVR1,90:up|hsa:3091,HIF1A,3091:up|hsa:752,FMNL1,752:down|hsa:2043,EPHA4,2043:up|hsa:5864,RAB3A,5864:down|hsa:2274,FHL2,2274:up|hsa:10553,HTATIP2,10553:down|hsa:971,CD72,971:down|hsa:2821,GPI,2821:up|hsa:11123,RCAN3,11123:up|hsa:2709,GJB5,2709:down|hsa:30011,SH3KBP1,30011:down|hsa:56288,PARD3,56288:up|hsa:199221,DZIP1L,199221:up	http://amigo.geneontology.org/cgi-bin/amigo/term_details?term=GO:0009653
regulation of phosphate metabolic process	Biological Process	GO:0019220	9	1435	103	17517	0.087378640776699	0.08192042016327	0.4710343715	0.8077844	hsa:5999,RGS4,5999:down|hsa:55023,PHIP,55023:up|hsa:90,ACVR1,90:up|hsa:1850,DUSP8,1850:up|hsa:3091,HIF1A,3091:up|hsa:2043,EPHA4,2043:up|hsa:4293,MAP3K9,4293:down|hsa:58509,CACTIN,58509:up|hsa:56288,PARD3,56288:up	http://amigo.geneontology.org/cgi-bin/amigo/term_details?term=GO:0019220
positive regulation of protein serine/threonine kinase activity	Biological Process	GO:0071902	2	269	103	17517	0.0194174757281553	0.0153565108180625	0.4711556319	0.8077844	hsa:2043,EPHA4,2043:up|hsa:4293,MAP3K9,4293:down	http://amigo.geneontology.org/cgi-bin/amigo/term_details?term=GO:0071902
positive regulation of nucleotide metabolic process	Biological Process	GO:0045981	1	108	103	17517	0.00970873786407767	0.00616543928754924	0.4721133288	0.8077844	hsa:3091,HIF1A,3091:up	http://amigo.geneontology.org/cgi-bin/amigo/term_details?term=GO:0045981
polysaccharide metabolic process	Biological Process	GO:0005976	1	108	103	17517	0.00970873786407767	0.00616543928754924	0.4721133288	0.8077844	hsa:1373,CPS1,1373:up	http://amigo.geneontology.org/cgi-bin/amigo/term_details?term=GO:0005976
positive regulation of purine nucleotide metabolic process	Biological Process	GO:1900544	1	108	103	17517	0.00970873786407767	0.00616543928754924	0.4721133288	0.8077844	hsa:3091,HIF1A,3091:up	http://amigo.geneontology.org/cgi-bin/amigo/term_details?term=GO:1900544
protein transport	Biological Process	GO:0015031	10	1605	103	17517	0.0970873786407767	0.091625278301079	0.4728726677	0.8077844	hsa:6202,RPS8,6202:down|hsa:6187,RPS2,6187:down|hsa:55023,PHIP,55023:up|hsa:6161,RPL32,6161:down|hsa:3091,HIF1A,3091:up|hsa:5864,RAB3A,5864:down|hsa:79856,SNX22,79856:down|hsa:6143,RPL19,6143:down|hsa:56288,PARD3,56288:up|hsa:8548,BLZF1,8548:up	http://amigo.geneontology.org/cgi-bin/amigo/term_details?term=GO:0015031
establishment of organelle localization	Biological Process	GO:0051656	2	270	103	17517	0.0194174757281553	0.0154135982188731	0.4730875438	0.8077844	hsa:199953,TMEM201,199953:down|hsa:5864,RAB3A,5864:down	http://amigo.geneontology.org/cgi-bin/amigo/term_details?term=GO:0051656
positive regulation of secretion by cell	Biological Process	GO:1903532	2	270	103	17517	0.0194174757281553	0.0154135982188731	0.4730875438	0.8077844	hsa:3091,HIF1A,3091:up|hsa:5864,RAB3A,5864:down	http://amigo.geneontology.org/cgi-bin/amigo/term_details?term=GO:1903532
erythrocyte homeostasis	Biological Process	GO:0034101	1	109	103	17517	0.00970873786407767	0.00622252668835988	0.4752365597	0.8091227	hsa:3091,HIF1A,3091:up	http://amigo.geneontology.org/cgi-bin/amigo/term_details?term=GO:0034101
triglyceride metabolic process	Biological Process	GO:0006641	1	109	103	17517	0.00970873786407767	0.00622252668835988	0.4752365597	0.8091227	hsa:1373,CPS1,1373:up	http://amigo.geneontology.org/cgi-bin/amigo/term_details?term=GO:0006641
negative regulation of cell projection organization	Biological Process	GO:0031345	1	109	103	17517	0.00970873786407767	0.00622252668835988	0.4752365597	0.8091227	hsa:2043,EPHA4,2043:up	http://amigo.geneontology.org/cgi-bin/amigo/term_details?term=GO:0031345
negative regulation of transmembrane receptor protein serine/threonine kinase signaling pathway	Biological Process	GO:0090101	1	109	103	17517	0.00970873786407767	0.00622252668835988	0.4752365597	0.8091227	hsa:90,ACVR1,90:up	http://amigo.geneontology.org/cgi-bin/amigo/term_details?term=GO:0090101
regulation of nervous system development	Biological Process	GO:0051960	4	603	103	17517	0.0388349514563107	0.0344237026888166	0.4755577429	0.8091227	hsa:3091,HIF1A,3091:up|hsa:56288,PARD3,56288:up|hsa:79816,TLE6,79816:down|hsa:2043,EPHA4,2043:up	http://amigo.geneontology.org/cgi-bin/amigo/term_details?term=GO:0051960
cellular carbohydrate metabolic process	Biological Process	GO:0044262	2	272	103	17517	0.0194174757281553	0.0155277730204944	0.4769388286	0.8098386	hsa:1373,CPS1,1373:up|hsa:3091,HIF1A,3091:up	http://amigo.geneontology.org/cgi-bin/amigo/term_details?term=GO:0044262
response to molecule of bacterial origin	Biological Process	GO:0002237	2	272	103	17517	0.0194174757281553	0.0155277730204944	0.4769388286	0.8098386	hsa:1373,CPS1,1373:up|hsa:58509,CACTIN,58509:up	http://amigo.geneontology.org/cgi-bin/amigo/term_details?term=GO:0002237
regulation of developmental process	Biological Process	GO:0050793	12	1947	103	17517	0.116504854368932	0.111149169378318	0.4773086809	0.8098386	hsa:55841,WWC3,55841:up|hsa:55023,PHIP,55023:up|hsa:90,ACVR1,90:up|hsa:339345,NANOS2,339345:up|hsa:3091,HIF1A,3091:up|hsa:752,FMNL1,752:down|hsa:2043,EPHA4,2043:up|hsa:10553,HTATIP2,10553:down|hsa:30011,SH3KBP1,30011:down|hsa:653619,PRAMEF15,653619:up|hsa:79816,TLE6,79816:down|hsa:56288,PARD3,56288:up	http://amigo.geneontology.org/cgi-bin/amigo/term_details?term=GO:0050793
positive regulation of mitotic cell cycle	Biological Process	GO:0045931	1	110	103	17517	0.00970873786407767	0.00627961408917052	0.4783414904	0.8098386	hsa:55023,PHIP,55023:up	http://amigo.geneontology.org/cgi-bin/amigo/term_details?term=GO:0045931
action potential	Biological Process	GO:0001508	1	110	103	17517	0.00970873786407767	0.00627961408917052	0.4783414904	0.8098386	hsa:9722,NOS1AP,9722:up	http://amigo.geneontology.org/cgi-bin/amigo/term_details?term=GO:0001508
cellular amino acid catabolic process	Biological Process	GO:0009063	1	110	103	17517	0.00970873786407767	0.00627961408917052	0.4783414904	0.8098386	hsa:1373,CPS1,1373:up	http://amigo.geneontology.org/cgi-bin/amigo/term_details?term=GO:0009063
response to transition metal nanoparticle	Biological Process	GO:1990267	1	111	103	17517	0.00970873786407767	0.00633670148998116	0.4814282272	0.8127701	hsa:1373,CPS1,1373:up	http://amigo.geneontology.org/cgi-bin/amigo/term_details?term=GO:1990267
T cell receptor signaling pathway	Biological Process	GO:0050852	1	111	103	17517	0.00970873786407767	0.00633670148998116	0.4814282272	0.8127701	hsa:9473,THEMIS2,9473:up	http://amigo.geneontology.org/cgi-bin/amigo/term_details?term=GO:0050852
positive regulation of angiogenesis	Biological Process	GO:0045766	1	111	103	17517	0.00970873786407767	0.00633670148998116	0.4814282272	0.8127701	hsa:3091,HIF1A,3091:up	http://amigo.geneontology.org/cgi-bin/amigo/term_details?term=GO:0045766
regulation of phosphorus metabolic process	Biological Process	GO:0051174	9	1448	103	17517	0.087378640776699	0.0826625563738083	0.4820666820	0.8132756	hsa:5999,RGS4,5999:down|hsa:55023,PHIP,55023:up|hsa:90,ACVR1,90:up|hsa:1850,DUSP8,1850:up|hsa:3091,HIF1A,3091:up|hsa:2043,EPHA4,2043:up|hsa:4293,MAP3K9,4293:down|hsa:58509,CACTIN,58509:up|hsa:56288,PARD3,56288:up	http://amigo.geneontology.org/cgi-bin/amigo/term_details?term=GO:0051174
regulation of innate immune response	Biological Process	GO:0045088	2	275	103	17517	0.0194174757281553	0.0156990352229263	0.4826841429	0.8137451	hsa:115004,MB21D1,115004:down|hsa:58509,CACTIN,58509:up	http://amigo.geneontology.org/cgi-bin/amigo/term_details?term=GO:0045088
single-organism membrane fusion	Biological Process	GO:0044801	1	112	103	17517	0.00970873786407767	0.0063937888907918	0.4844968755	0.8150828	hsa:5864,RAB3A,5864:down	http://amigo.geneontology.org/cgi-bin/amigo/term_details?term=GO:0044801
DNA damage response, signal transduction by p53 class mediator	Biological Process	GO:0030330	1	112	103	17517	0.00970873786407767	0.0063937888907918	0.4844968755	0.8150828	hsa:10397,NDRG1,10397:up	http://amigo.geneontology.org/cgi-bin/amigo/term_details?term=GO:0030330
mRNA processing	Biological Process	GO:0006397	3	443	103	17517	0.029126213592233	0.025289718559114	0.4851613795	0.8156287	hsa:58509,CACTIN,58509:up|hsa:79650,USB1,79650:up|hsa:10978,CLP1,10978:up	http://amigo.geneontology.org/cgi-bin/amigo/term_details?term=GO:0006397
mitotic cell cycle	Biological Process	GO:0000278	6	947	103	17517	0.058252427184466	0.0540617685676771	0.4857108641	0.8159806	hsa:29933,GPR132,29933:up|hsa:55023,PHIP,55023:up|hsa:90,ACVR1,90:up|hsa:80321,CEP70,80321:up|hsa:8548,BLZF1,8548:up|hsa:901,CCNG2,901:down	http://amigo.geneontology.org/cgi-bin/amigo/term_details?term=GO:0000278
heart development	Biological Process	GO:0007507	3	444	103	17517	0.029126213592233	0.0253468059599246	0.4866593964	0.8167783	hsa:90,ACVR1,90:up|hsa:3091,HIF1A,3091:up|hsa:2274,FHL2,2274:up	http://amigo.geneontology.org/cgi-bin/amigo/term_details?term=GO:0007507
regulation of intracellular signal transduction	Biological Process	GO:1902531	9	1455	103	17517	0.087378640776699	0.0830621681794828	0.4879882756	0.8169462	hsa:5999,RGS4,5999:down|hsa:55841,WWC3,55841:up|hsa:1850,DUSP8,1850:up|hsa:3091,HIF1A,3091:up|hsa:23263,MCF2L,23263:down|hsa:2043,EPHA4,2043:up|hsa:4293,MAP3K9,4293:down|hsa:64857,PLEKHG2,64857:down|hsa:9722,NOS1AP,9722:up	http://amigo.geneontology.org/cgi-bin/amigo/term_details?term=GO:1902531
cell division	Biological Process	GO:0051301	4	613	103	17517	0.0388349514563107	0.034994576696923	0.4883747472	0.8170230	hsa:55023,PHIP,55023:up|hsa:339345,NANOS2,339345:up|hsa:56288,PARD3,56288:up|hsa:901,CCNG2,901:down	http://amigo.geneontology.org/cgi-bin/amigo/term_details?term=GO:0051301
formation of primary germ layer	Biological Process	GO:0001704	1	114	103	17517	0.00970873786407767	0.00650796369241308	0.4905803261	0.8201409	hsa:90,ACVR1,90:up	http://amigo.geneontology.org/cgi-bin/amigo/term_details?term=GO:0001704
intracellular receptor signaling pathway	Biological Process	GO:0030522	2	280	103	17517	0.0194174757281553	0.0159844722269795	0.4921742503	0.8222326	hsa:653619,PRAMEF15,653619:up|hsa:2274,FHL2,2274:up	http://amigo.geneontology.org/cgi-bin/amigo/term_details?term=GO:0030522
intrinsic apoptotic signaling pathway	Biological Process	GO:0097193	2	281	103	17517	0.0194174757281553	0.0160415596277901	0.4940593170	0.8248074	hsa:3091,HIF1A,3091:up|hsa:79073,TMEM109,79073:down	http://amigo.geneontology.org/cgi-bin/amigo/term_details?term=GO:0097193
transcription from RNA polymerase II promoter	Biological Process	GO:0006366	11	1802	103	17517	0.106796116504854	0.102871496260775	0.4952267479	0.8261815	hsa:55841,WWC3,55841:up|hsa:55023,PHIP,55023:up|hsa:90,ACVR1,90:up|hsa:3091,HIF1A,3091:up|hsa:23263,MCF2L,23263:down|hsa:10978,CLP1,10978:up|hsa:2274,FHL2,2274:up|hsa:10553,HTATIP2,10553:down|hsa:54925,ZSCAN32,54925:up|hsa:8548,BLZF1,8548:up|hsa:64344,HIF3A,64344:up	http://amigo.geneontology.org/cgi-bin/amigo/term_details?term=GO:0006366
neurotrophin TRK receptor signaling pathway	Biological Process	GO:0048011	2	282	103	17517	0.0194174757281553	0.0160986470286008	0.4959400305	0.8267355	hsa:23263,MCF2L,23263:down|hsa:64857,PLEKHG2,64857:down	http://amigo.geneontology.org/cgi-bin/amigo/term_details?term=GO:0048011
collagen metabolic process	Biological Process	GO:0032963	1	116	103	17517	0.00970873786407767	0.00662213849403437	0.4965926748	0.8267355	hsa:3091,HIF1A,3091:up	http://amigo.geneontology.org/cgi-bin/amigo/term_details?term=GO:0032963
cell recognition	Biological Process	GO:0008037	1	116	103	17517	0.00970873786407767	0.00662213849403437	0.4965926748	0.8267355	hsa:2043,EPHA4,2043:up	http://amigo.geneontology.org/cgi-bin/amigo/term_details?term=GO:0008037
regulation of transcription from RNA polymerase II promoter	Biological Process	GO:0006357	10	1638	103	17517	0.0970873786407767	0.0935091625278301	0.4994084391	0.8295864	hsa:55841,WWC3,55841:up|hsa:55023,PHIP,55023:up|hsa:90,ACVR1,90:up|hsa:3091,HIF1A,3091:up|hsa:23263,MCF2L,23263:down|hsa:2274,FHL2,2274:up|hsa:10553,HTATIP2,10553:down|hsa:54925,ZSCAN32,54925:up|hsa:8548,BLZF1,8548:up|hsa:64344,HIF3A,64344:up	http://amigo.geneontology.org/cgi-bin/amigo/term_details?term=GO:0006357
acylglycerol metabolic process	Biological Process	GO:0006639	1	117	103	17517	0.00970873786407767	0.00667922589484501	0.4995724434	0.8295864	hsa:1373,CPS1,1373:up	http://amigo.geneontology.org/cgi-bin/amigo/term_details?term=GO:0006639
camera-type eye development	Biological Process	GO:0043010	2	284	103	17517	0.0194174757281553	0.0162128218302221	0.4996883407	0.8295864	hsa:3091,HIF1A,3091:up|hsa:4810,NHS,4810:down	http://amigo.geneontology.org/cgi-bin/amigo/term_details?term=GO:0043010
positive regulation of catalytic activity	Biological Process	GO:0043085	7	1131	103	17517	0.0679611650485437	0.0645658503168351	0.5006449577	0.8297184	hsa:5999,RGS4,5999:down|hsa:6187,RPS2,6187:down|hsa:3091,HIF1A,3091:up|hsa:9722,NOS1AP,9722:up|hsa:2043,EPHA4,2043:up|hsa:5864,RAB3A,5864:down|hsa:4293,MAP3K9,4293:down	http://amigo.geneontology.org/cgi-bin/amigo/term_details?term=GO:0043085
embryonic organ morphogenesis	Biological Process	GO:0048562	2	285	103	17517	0.0194174757281553	0.0162699092310327	0.5015559096	0.8297184	hsa:90,ACVR1,90:up|hsa:3091,HIF1A,3091:up	http://amigo.geneontology.org/cgi-bin/amigo/term_details?term=GO:0048562
Rab protein signal transduction	Biological Process	GO:0032482	2	285	103	17517	0.0194174757281553	0.0162699092310327	0.5015559096	0.8297184	hsa:5999,RGS4,5999:down|hsa:5864,RAB3A,5864:down	http://amigo.geneontology.org/cgi-bin/amigo/term_details?term=GO:0032482
neutral lipid metabolic process	Biological Process	GO:0006638	1	118	103	17517	0.00970873786407767	0.00673631329565565	0.5025347445	0.8297184	hsa:1373,CPS1,1373:up	http://amigo.geneontology.org/cgi-bin/amigo/term_details?term=GO:0006638
calcium-mediated signaling	Biological Process	GO:0019722	1	118	103	17517	0.00970873786407767	0.00673631329565565	0.5025347445	0.8297184	hsa:11123,RCAN3,11123:up	http://amigo.geneontology.org/cgi-bin/amigo/term_details?term=GO:0019722
response to ketone	Biological Process	GO:1901654	1	118	103	17517	0.00970873786407767	0.00673631329565565	0.5025347445	0.8297184	hsa:1373,CPS1,1373:up	http://amigo.geneontology.org/cgi-bin/amigo/term_details?term=GO:1901654
neurotrophin signaling pathway	Biological Process	GO:0038179	2	286	103	17517	0.0194174757281553	0.0163269966318434	0.5034190697	0.8306068	hsa:23263,MCF2L,23263:down|hsa:64857,PLEKHG2,64857:down	http://amigo.geneontology.org/cgi-bin/amigo/term_details?term=GO:0038179
keratinocyte differentiation	Biological Process	GO:0030216	1	119	103	17517	0.00970873786407767	0.00679340069646629	0.5054796793	0.8317186	hsa:353131,LCE1A,353131:up	http://amigo.geneontology.org/cgi-bin/amigo/term_details?term=GO:0030216
learning	Biological Process	GO:0007612	1	119	103	17517	0.00970873786407767	0.00679340069646629	0.5054796793	0.8317186	hsa:3091,HIF1A,3091:up	http://amigo.geneontology.org/cgi-bin/amigo/term_details?term=GO:0007612
mesoderm development	Biological Process	GO:0007498	1	119	103	17517	0.00970873786407767	0.00679340069646629	0.5054796793	0.8317186	hsa:90,ACVR1,90:up	http://amigo.geneontology.org/cgi-bin/amigo/term_details?term=GO:0007498
Rho protein signal transduction	Biological Process	GO:0007266	2	288	103	17517	0.0194174757281553	0.0164411714334646	0.5071321116	0.8319708	hsa:5999,RGS4,5999:down|hsa:23263,MCF2L,23263:down	http://amigo.geneontology.org/cgi-bin/amigo/term_details?term=GO:0007266
positive regulation of cell cycle	Biological Process	GO:0045787	2	288	103	17517	0.0194174757281553	0.0164411714334646	0.5071321116	0.8319708	hsa:55023,PHIP,55023:up|hsa:10397,NDRG1,10397:up	http://amigo.geneontology.org/cgi-bin/amigo/term_details?term=GO:0045787
response to organophosphorus	Biological Process	GO:0046683	1	120	103	17517	0.00970873786407767	0.00685048809727693	0.5084073488	0.8319708	hsa:1373,CPS1,1373:up	http://amigo.geneontology.org/cgi-bin/amigo/term_details?term=GO:0046683
positive regulation of cell division	Biological Process	GO:0051781	1	120	103	17517	0.00970873786407767	0.00685048809727693	0.5084073488	0.8319708	hsa:55023,PHIP,55023:up	http://amigo.geneontology.org/cgi-bin/amigo/term_details?term=GO:0051781
positive regulation of vasculature development	Biological Process	GO:1904018	1	120	103	17517	0.00970873786407767	0.00685048809727693	0.5084073488	0.8319708	hsa:3091,HIF1A,3091:up	http://amigo.geneontology.org/cgi-bin/amigo/term_details?term=GO:1904018
negative regulation of defense response	Biological Process	GO:0031348	1	121	103	17517	0.00970873786407767	0.00690757549808757	0.5113178531	0.8350249	hsa:58509,CACTIN,58509:up	http://amigo.geneontology.org/cgi-bin/amigo/term_details?term=GO:0031348
morphogenesis of an epithelium	Biological Process	GO:0002009	3	461	103	17517	0.029126213592233	0.0263172917737055	0.5118040773	0.8352503	hsa:90,ACVR1,90:up|hsa:3091,HIF1A,3091:up|hsa:56288,PARD3,56288:up	http://amigo.geneontology.org/cgi-bin/amigo/term_details?term=GO:0002009
cellular protein localization	Biological Process	GO:0034613	8	1314	103	17517	0.0776699029126214	0.0750128446651824	0.5125982414	0.8359777	hsa:6202,RPS8,6202:down|hsa:6187,RPS2,6187:down|hsa:55023,PHIP,55023:up|hsa:6161,RPL32,6161:down|hsa:5864,RAB3A,5864:down|hsa:6143,RPL19,6143:down|hsa:56288,PARD3,56288:up|hsa:8548,BLZF1,8548:up	http://amigo.geneontology.org/cgi-bin/amigo/term_details?term=GO:0034613
negative regulation of developmental process	Biological Process	GO:0051093	5	804	103	17517	0.0485436893203883	0.0458982702517554	0.5139995180	0.8366332	hsa:55841,WWC3,55841:up|hsa:339345,NANOS2,339345:up|hsa:3091,HIF1A,3091:up|hsa:653619,PRAMEF15,653619:up|hsa:2043,EPHA4,2043:up	http://amigo.geneontology.org/cgi-bin/amigo/term_details?term=GO:0051093
intracellular steroid hormone receptor signaling pathway	Biological Process	GO:0030518	1	122	103	17517	0.00970873786407767	0.00696466289889821	0.5142112919	0.8366332	hsa:2274,FHL2,2274:up	http://amigo.geneontology.org/cgi-bin/amigo/term_details?term=GO:0030518
multicellular organismal macromolecule metabolic process	Biological Process	GO:0044259	1	122	103	17517	0.00970873786407767	0.00696466289889821	0.5142112919	0.8366332	hsa:3091,HIF1A,3091:up	http://amigo.geneontology.org/cgi-bin/amigo/term_details?term=GO:0044259
organophosphate metabolic process	Biological Process	GO:0019637	6	975	103	17517	0.058252427184466	0.0556602157903751	0.5143951466	0.8366332	hsa:1373,CPS1,1373:up|hsa:2821,GPI,2821:up|hsa:4538,ND4,4538:down|hsa:3091,HIF1A,3091:up|hsa:115004,MB21D1,115004:down|hsa:4537,ND3,4537:up	http://amigo.geneontology.org/cgi-bin/amigo/term_details?term=GO:0019637
regulation of cellular response to stress	Biological Process	GO:0080135	3	464	103	17517	0.029126213592233	0.0264885539761375	0.5161758221	0.8381713	hsa:3091,HIF1A,3091:up|hsa:2043,EPHA4,2043:up|hsa:4293,MAP3K9,4293:down	http://amigo.geneontology.org/cgi-bin/amigo/term_details?term=GO:0080135
embryonic epithelial tube formation	Biological Process	GO:0001838	1	123	103	17517	0.00970873786407767	0.00702175029970885	0.5170877642	0.8381713	hsa:3091,HIF1A,3091:up	http://amigo.geneontology.org/cgi-bin/amigo/term_details?term=GO:0001838
mitotic cell cycle phase transition	Biological Process	GO:0044772	3	465	103	17517	0.029126213592233	0.0265456413769481	0.5176285437	0.8384813	hsa:29933,GPR132,29933:up|hsa:90,ACVR1,90:up|hsa:80321,CEP70,80321:up	http://amigo.geneontology.org/cgi-bin/amigo/term_details?term=GO:0044772
cellular macromolecule localization	Biological Process	GO:0070727	8	1322	103	17517	0.0776699029126214	0.0754695438716675	0.5196441929	0.8394677	hsa:6202,RPS8,6202:down|hsa:6187,RPS2,6187:down|hsa:55023,PHIP,55023:up|hsa:6161,RPL32,6161:down|hsa:5864,RAB3A,5864:down|hsa:6143,RPL19,6143:down|hsa:56288,PARD3,56288:up|hsa:8548,BLZF1,8548:up	http://amigo.geneontology.org/cgi-bin/amigo/term_details?term=GO:0070727
cell morphogenesis involved in neuron differentiation	Biological Process	GO:0048667	4	638	103	17517	0.0388349514563107	0.036421761717189	0.5198574330	0.8394677	hsa:971,CD72,971:down|hsa:56288,PARD3,56288:up|hsa:2043,EPHA4,2043:up|hsa:5864,RAB3A,5864:down	http://amigo.geneontology.org/cgi-bin/amigo/term_details?term=GO:0048667
cellular response to lipopolysaccharide	Biological Process	GO:0071222	1	124	103	17517	0.00970873786407767	0.00707883770051949	0.5199473687	0.8394677	hsa:58509,CACTIN,58509:up	http://amigo.geneontology.org/cgi-bin/amigo/term_details?term=GO:0071222
epithelial tube formation	Biological Process	GO:0072175	1	124	103	17517	0.00970873786407767	0.00707883770051949	0.5199473687	0.8394677	hsa:3091,HIF1A,3091:up	http://amigo.geneontology.org/cgi-bin/amigo/term_details?term=GO:0072175
epidermis development	Biological Process	GO:0008544	2	295	103	17517	0.0194174757281553	0.0168407832391391	0.5199870512	0.8394677	hsa:2709,GJB5,2709:down|hsa:353131,LCE1A,353131:up	http://amigo.geneontology.org/cgi-bin/amigo/term_details?term=GO:0008544
regulation of actin filament-based process	Biological Process	GO:0032970	2	296	103	17517	0.0194174757281553	0.0168978706399498	0.5218054514	0.8400360	hsa:9722,NOS1AP,9722:up|hsa:56288,PARD3,56288:up	http://amigo.geneontology.org/cgi-bin/amigo/term_details?term=GO:0032970
regulation of axonogenesis	Biological Process	GO:0050770	1	125	103	17517	0.00970873786407767	0.00713592510133014	0.5227902032	0.8400360	hsa:2043,EPHA4,2043:up	http://amigo.geneontology.org/cgi-bin/amigo/term_details?term=GO:0050770
acute inflammatory response	Biological Process	GO:0002526	1	125	103	17517	0.00970873786407767	0.00713592510133014	0.5227902032	0.8400360	hsa:90,ACVR1,90:up	http://amigo.geneontology.org/cgi-bin/amigo/term_details?term=GO:0002526
regulation of synaptic plasticity	Biological Process	GO:0048167	1	125	103	17517	0.00970873786407767	0.00713592510133014	0.5227902032	0.8400360	hsa:5864,RAB3A,5864:down	http://amigo.geneontology.org/cgi-bin/amigo/term_details?term=GO:0048167
mRNA transport	Biological Process	GO:0051028	1	125	103	17517	0.00970873786407767	0.00713592510133014	0.5227902032	0.8400360	hsa:26019,UPF2,26019:up	http://amigo.geneontology.org/cgi-bin/amigo/term_details?term=GO:0051028
peptide transport	Biological Process	GO:0015833	2	298	103	17517	0.0194174757281553	0.017012045441571	0.5254286311	0.8434473	hsa:6892,TAPBP,6892:up|hsa:3091,HIF1A,3091:up	http://amigo.geneontology.org/cgi-bin/amigo/term_details?term=GO:0015833
response to ionizing radiation	Biological Process	GO:0010212	1	126	103	17517	0.00970873786407767	0.00719301250214078	0.5256163652	0.8434473	hsa:79073,TMEM109,79073:down	http://amigo.geneontology.org/cgi-bin/amigo/term_details?term=GO:0010212
mitotic cell cycle process	Biological Process	GO:1903047	5	817	103	17517	0.0485436893203883	0.0466404064622938	0.5283764936	0.8440641	hsa:29933,GPR132,29933:up|hsa:55023,PHIP,55023:up|hsa:90,ACVR1,90:up|hsa:80321,CEP70,80321:up|hsa:901,CCNG2,901:down	http://amigo.geneontology.org/cgi-bin/amigo/term_details?term=GO:1903047
myeloid cell homeostasis	Biological Process	GO:0002262	1	127	103	17517	0.00970873786407767	0.00725009990295142	0.5284259515	0.8440641	hsa:3091,HIF1A,3091:up	http://amigo.geneontology.org/cgi-bin/amigo/term_details?term=GO:0002262
vascular endothelial growth factor receptor signaling pathway	Biological Process	GO:0048010	1	127	103	17517	0.00970873786407767	0.00725009990295142	0.5284259515	0.8440641	hsa:3091,HIF1A,3091:up	http://amigo.geneontology.org/cgi-bin/amigo/term_details?term=GO:0048010
columnar/cuboidal epithelial cell differentiation	Biological Process	GO:0002065	1	127	103	17517	0.00970873786407767	0.00725009990295142	0.5284259515	0.8440641	hsa:3091,HIF1A,3091:up	http://amigo.geneontology.org/cgi-bin/amigo/term_details?term=GO:0002065
behavior	Biological Process	GO:0007610	4	645	103	17517	0.0388349514563107	0.0368213735228635	0.5285155494	0.8440641	hsa:64856,VWA1,64856:up|hsa:2821,GPI,2821:up|hsa:3091,HIF1A,3091:up|hsa:2043,EPHA4,2043:up	http://amigo.geneontology.org/cgi-bin/amigo/term_details?term=GO:0007610
[truncated: 711 more rows]

## Sheet: Molecular Function
Term	Database	ID	Input number	Background number	All input number	All background number	Input frequency	Background frequency	P-Value	Corrected P-Value	Input	Hyperlink
[truncated: 291 more rows]
